# Supplementary material for: Single-cell RNA sequencing unifies developmental programs of Esophageal and Gastric Intestinal Metaplasia
Source: Cancer Discov. Author manuscript; Available in PMC 2023 Jun 23. (PMC10236154; doi:10.1158/2159-8290.CD-22-0824)
Supplement: Table S1 [file EMS172799-supplement-Table_S1.xlsx]

## Sheet: Patient data
Sample	Patient ID in current study	Science manuscript Patient ID	EGA_ID	Study_ID	Donor_ID_CBTM	Donor_ID_Fitzgerald laboratory	10x genomics 3' scRNA-seq chemistry	Other experiments	Batch	Barcode	Tissue	Age	Gender	Notes
SLX-12927.SIGAE2	Patient01	Patient01	EGAN00002232660 (SAMEA6064675)	AHM1896			Single Cell 3' v2		SLX-12927	SIGAE2	NE	57	M
SLX-12927.SIGAG2	Patient01	Patient01	EGAN00002232659 (SAMEA6064674)	AHM1896			Single Cell 3' v2		SLX-12927	SIGAG2	NG	57	M
SLX-12927.SIGAF2	Patient01	Patient01	EGAN00002232661 (SAMEA6064676)	AHM1896			Single Cell 3' v2		SLX-12927	SIGAF2	NSCJ	57	M
SLX-14096.SIGAC9	Patient02	Patient02	EGAN00002232657 (SAMEA6064672)	AHM1915			Single Cell 3' v2		SLX-14096	SIGAC9	NE	48	F
SLX-14096.SIGAE9	Patient02	Patient02	EGAN00002232656 (SAMEA6064671)	AHM1915			Single Cell 3' v2		SLX-14096	SIGAE9	NG	48	F
SLX-14096.SIGAD9	Patient02	Patient02	EGAN00002232658 (SAMEA6064673)	AHM1915			Single Cell 3' v2		SLX-14096	SIGAD9	NSCJ	48	F
SLX-14961.SIGAC5	Patient03	Patient03	EGAN00002232668 (SAMEA6064683)	AHM1557			Single Cell 3' v2		SLX-14961	SIGAC5	BE	58	F
SLX-14961.SIGAB5	Patient03	Patient03	EGAN00002232669 (SAMEA6064684)	AHM1557			Single Cell 3' v2		SLX-14961	SIGAB5	BSCJ	58	F
SLX-14961.SIGAD5	Patient03	Patient03	EGAN00002232641 (SAMEA6064656)	AHM1557			Single Cell 3' v2		SLX-14961	SIGAD5	NG	58	F
SLX-14961.SIGAA5	Patient03	Patient03	EGAN00002232642 (SAMEA6064657)	AHM1915			Single Cell 3' v2		SLX-14961	SIGAA5	NE	58	F
SLX-15296.SIGAF11	Patient05	Patient05	EGAN00002232652 (SAMEA6064667)		302C	DE09	Single Cell 3' v2		SLX-15296	SIGAF11	NE	43	M
SLX-15296.SIGAH11	Patient05	Patient05	EGAN00002232651 (SAMEA6064666)		302C	DE09	Single Cell 3' v2		SLX-15296	SIGAH11	NG	43	M
SLX-15296.SIGAG11	Patient05	Patient05	EGAN00002232653 (SAMEA6064668)		302C	DE09	Single Cell 3' v2	IF for S1/S2/S3 fibroblasts	SLX-15296	SIGAG11	NSCJ	43	M
HCATisStabAug177184859.Karol-A	Patient06	Patient06	TBC		296C	DE07	Single Cell 3' v2		HCATisStabAug177184859	Karol-A	NE	34	F	Seqeunced at Sanger
HCATisStabAug177184859.Karol-C	Patient06	Patient06	TBC		296C	DE07	Single Cell 3' v2		HCATisStabAug177184859	Karol-E	NG	34	F	Seqeunced at Sanger
HCATisStabAug177184859.Karol-B	Patient06	Patient06	TBC		296C	DE07	Single Cell 3' v2		HCATisStabAug177184859	Karol-C	NSCJ	34	F	Seqeunced at Sanger
SLX-15694.SIGAC4	Patient07	Patient07	EGAN00002232670 (SAMEA6064685)	AHM1994			Single Cell 3' v2		SLX-15694	SIGAC4	BE	45	M
SLX-15694.SIGAB4	Patient07	Patient07	EGAN00002232671 (SAMEA6064686)	AHM1994			Single Cell 3' v2		SLX-15694	SIGAB4	BSCJ	45	M
SLX-15694.SIGAE4	Patient07	Patient07	EGAN00002232648 (SAMEA6064663)	AHM1994			Single Cell 3' v2		SLX-15694	SIGAE4	ND	45	M
SLX-15694.SIGAA4	Patient07	Patient07	EGAN00002232650 (SAMEA6064665)	AHM1994			Single Cell 3' v2		SLX-15694	SIGAA4	NE	45	M
SLX-15694.SIGAD4	Patient07	Patient07	EGAN00002232649 (SAMEA6064664)	AHM1994			Single Cell 3' v2		SLX-15694	SIGAD4	NG	45	M
SLX-15696.SIGAG7	Patient08	Patient08	EGAN00002232662 (SAMEA6064677)	AHM1784			Single Cell 3' v2		SLX-15696	SIGAG7	ND	29	M
SLX-15696.SIGAD7	Patient08	Patient08	EGAN00002232664 (SAMEA6064679)	AHM1784			Single Cell 3' v2		SLX-15696	SIGAD7	NE	29	M
SLX-15696.SIGAF7	Patient08	Patient08	EGAN00002232663 (SAMEA6064678)	AHM1784			Single Cell 3' v2		SLX-15696	SIGAF7	NG	29	M
SLX-15696.SIGAE7	Patient08	Patient08	EGAN00002232665 (SAMEA6064680)	AHM1784			Single Cell 3' v2		SLX-15696	SIGAE7	NSCJ	29	M
SLX-15730.SIGAF9	Patient09	Patient09	EGAN00002232666 (SAMEA6064681)	AHM0163			Single Cell 3' v2		SLX-15730	SIGAF9	BE	77	M
SLX-15730.SIGAE9	Patient09	Patient09	EGAN00002232667 (SAMEA6064682)	AHM0163			Single Cell 3' v2		SLX-15730	SIGAE9	BSCJ	77	M
SLX-15730.SIGAH9	Patient09	Patient09	EGAN00002232635 (SAMEA6064650)	AHM0163			Single Cell 3' v2		SLX-15730	SIGAH9	ND	77	M
SLX-15730.SIGAD9	Patient09	Patient09	EGAN00002232637 (SAMEA6064652)	AHM0163			Single Cell 3' v2		SLX-15730	SIGAD9	NE	77	M
SLX-15730.SIGAG9	Patient09	Patient09	EGAN00002232636 (SAMEA6064651)	AHM0163			Single Cell 3' v2		SLX-15730	SIGAG9	NG	77	M
SLX-15694.SIGAA5	Patient10	Patient10	EGAN00002232645 (SAMEA6064660)		312C	DE11	Single Cell 3' v2		SLX-15694	SIGAA5	NE	77	F
SLX-15694.SIGAC5	Patient10	Patient10	EGAN00002232644 (SAMEA6064659)		312C	DE11	Single Cell 3' v2		SLX-15694	SIGAC5	NG	77	F
SLX-15694.SIGAB5	Patient10	Patient10	EGAN00002232646 (SAMEA6064661)		312C	DE11	Single Cell 3' v2	IF for S1/S2/S3 fibroblasts	SLX-15694	SIGAB5	NSCJ	77	F
SLX-15694.SIGAD5	Patient10	Patient10	EGAN00002232647 (SAMEA6064662)		312C	DE11	Single Cell 3' v2		SLX-15694	SIGAD5	SMG	77	F
SLX-15730.SIGAA4	Patient11	Patient11	EGAN00002232643 (SAMEA6064658)		316B	DE12	Single Cell 3' v2		SLX-15730	SIGAA4	SMG	27	F
SLX-16368.SIGAC3	Patient12	Patient12	EGAN00002232672 (SAMEA6064687)	AHM1997			Single Cell 3' v2		SLX-16368	SIGAC3	E-GM	55	F
SLX-16368.SIGAE3	Patient12	Patient12	EGAN00002232654 (SAMEA6064669)	AHM1997			Single Cell 3' v2		SLX-16368	SIGAE3	ND	55	F
SLX-16368.SIGAD3	Patient12	Patient12	EGAN00002232655 (SAMEA6064670)	AHM1997			Single Cell 3' v2		SLX-16368	SIGAD3	NG	55	F
SLX-16801.SIGAE8	Patient13	Patient13	EGAN00002232638 (SAMEA6064653)		356C	DE16	Single Cell 3' v2		SLX-16801	SIGAE8	NG	41	F
SLX-16801.SIGAD8	Patient13	Patient13	EGAN00002232639 (SAMEA6064654)		356C	DE16	Single Cell 3' v2	IF for MUC5AC/MUC6/GPA33/OLFM4; IF for S1/S2/S3 fibroblasts	SLX-16801	SIGAD8	NSCJ	41	F
SLX-16801.SIGAC8	Patient13	Patient13	EGAN00002232640 (SAMEA6064655)		356C	DE16	Single Cell 3' v2		SLX-16801	SIGAC8	SMG	41	F
SLX-17386.SIGAE8	Patient14	NA	NA	AHM2146			Single Cell 3' v3	IF for MUC5AC/MUC6/GPA33/OLFM4; IF for S1/S2/S3 fibroblasts	SLX-17386	SIGAE8	GIM	53	F
SLX-17386.SIGAF8	Patient14	NA	NA	AHM2146			Single Cell 3' v3		SLX-17386	SIGAF8	NG	53	F
SLX-18011.SIGAG11	Patient15	Patient04	TBC		417C	DE25	Single Cell 3' v3		SLX-18011	SIGAG11	NSCJ	69	M
SLX-19079.SIGAB1	Patient16	NA	NA	AHM2269			Single Cell 3' v3		SLX-19079	SIGAB1	CIM	62	M
SLX-19079.SIGAA1	Patient16	NA	NA	AHM2269			Single Cell 3' v3	IF for MUC5AC/MUC6/GPA33/OLFM4	SLX-19079	SIGAA1	GIM	62	M
SLX-19079.SIGAC1	Patient16	NA	NA	AHM2269			Single Cell 3' v3		SLX-19079	SIGAC1	NG	62	M
SLX-19113.SIGAG7	Patient17	NA	NA	AHM2074			Single Cell 3' v3		SLX-19113	SIGAG7	CIM	74	M
SLX-19113.SIGAH1	Patient17	NA	NA	AHM2074			Single Cell 3' v3		SLX-19113	SIGAH1	GIM	74	M
SLX-19113.SIGAH7	Patient17	NA	NA	AHM2074			Single Cell 3' v3		SLX-19113	SIGAH7	NG	74	M
SLX-19289.SIGAA3	Patient18	NA	NA	AHM1661			Single Cell 3' v3		SLX-19289	SIGAA3	E-GM	67	F
SLX-19289.SIGAB3	Patient19	Patient14	TBC	AH0197			Single Cell 3' v3		SLX-19289	SIGAB3	BE	92	M
SLX-19289.SIGAC3	Patient20	NA	NA	AHM1564			Single Cell 3' v3		SLX-19289	SIGAC3	E-GM	74	M
SLX-19592.SIGAB1	Patient21	NA	NA	AHM2247			Single Cell 3' v3		SLX-19592	SIGAB1	CIM	42	F
SLX-19592.SIGAA1	Patient21	NA	NA	AHM2247			Single Cell 3' v3		SLX-19592	SIGAA1	GIM	42	F
SLX-19592.SIGAC1	Patient21	NA	NA	AHM2247			Single Cell 3' v3		SLX-19592	SIGAC1	NG	42	F
SLX-19831.SIGAF9	Patient22	NA	NA	AHM2320			Single Cell 3' v3		SLX-19831	SIGAF9	CIM	83	M
SLX-19831.SIGAE9	Patient22	NA	NA	AHM2320			Single Cell 3' v3		SLX-19831	SIGAE9	GIM	83	M
SLX-19831.SIGAG9	Patient22	NA	NA	AHM2320			Single Cell 3' v3		SLX-19831	SIGAG9	NG	83	M
	Patient23				267C	DE03		IF for MUC5AC/MUC6/GPA33/OLFM4; IF for S1/S2/S3 fibroblasts			NSCJ	22	M
	Patient23				386C	DE21		IF for S1/S2/S3 fibroblasts			NSCJ	74	F
	Patient24				386C	DE21		IF for S1/S2/S3 fibroblasts			NSCJ	74	F
	Patient25				390C	DE22		IF for S1/S2/S3 fibroblasts			NSCJ	68	F
	Patient26				403C	DE23		IF for S1/S2/S3 fibroblasts			NSCJ	51	M
	Patient26				403C	DE23		IF for S1/S2/S3 fibroblasts			NSCJ	51	M
	Patient27				529C	DE28		IF for S1/S2/S3 fibroblasts			NG	37	M
	Patient28				534C	DE29		IF for S1/S2/S3 fibroblasts			NG	62	M
	Patient29				566B	DE30		IF for S1/S2/S3 fibroblasts			NG	29	F
	Patient30				689C	DE32		IF for MUC5AC/MUC6/GPA33/OLFM4			NSCJ	41	M
	Patient30				689C	DE32		IF for S1/S2/S3 fibroblasts			NG	41	M
	Patient31				694B	DE33		IF for S1/S2/S3 fibroblasts			NG	19	M
	Patient32			AHM1075				IF for MUC5AC/MUC6/GPA33/OLFM4			BE	74	M
	Patient33			AHM1291				IF for MUC5AC/MUC6/GPA33/OLFM4; IF for S1/S2/S3 fibroblasts			BE	76	M
	Patient34			AHM1421				IF for MUC5AC/MUC6/GPA33/OLFM4; IF for S1/S2/S3 fibroblasts			BE	50	F
	Patient35			AHM1470				IF for S1/S2/S3 fibroblasts			E-GM	68	M
	Patient36			AHM1473				IF for S1/S2/S3 fibroblasts			BE	72	M
	Patient37			AHM1487				IF for S1/S2/S3 fibroblasts			BE	72	M
	Patient37			AHM1487				IF for S1/S2/S3 fibroblasts			E-GM	72	M
	Patient38			AHM1553				IF for MUC5AC/MUC6/GPA33/OLFM4; IF for S1/S2/S3 fibroblasts			E-GM	79	M
	Patient39			AHM1577				IF for MUC5AC/MUC6/GPA33/OLFM4; IF for S1/S2/S3 fibroblasts			E-GM	57	M
	Patient40			AHM1702				IF for S1/S2/S3 fibroblasts			E-GM	52	M
	Patient41			AHM1739				IF for MUC5AC/MUC6/GPA33/OLFM4; IF for S1/S2/S3 fibroblasts			E-GM	64	M
	Patient42			AHM1942				IF for MUC5AC/MUC6/GPA33/OLFM4			BE	71	F
	Patient43			AHM1976				IF for S1/S2/S3 fibroblasts			E-GM	58	F
	Patient44			AHM2041				IF for S1/S2/S3 fibroblasts			BE	61	M
	Patient45			AHM2067				IF for S1/S2/S3 fibroblasts			E-GM	70	M
	Patient46			AHM2111				IF for S1/S2/S3 fibroblasts			E-GM	64	M
	Patient47			AHM2115				IF for S1/S2/S3 fibroblasts			BE	64	F
	Patient48			AHM2324				IF for MUC5AC/MUC6/GPA33/OLFM4			ND	78	M
	Patient49			AHM2331				IF for MUC5AC/MUC6/GPA33/OLFM4; IF for S1/S2/S3 fibroblasts			GIM	76	M
	Patient50			AHM2394				IF for MUC5AC/MUC6/GPA33/OLFM4			ND	77	M
	Patient51			AHM2409				IF for MUC5AC/MUC6/GPA33/OLFM4			CIM	83	F
	Patient52			AHM2409				IF for S1/S2/S3 fibroblasts			GIM	83	F
	Patient53			BEST2/CAM/0617				IF for MUC5AC/MUC6/GPA33/OLFM4; IF for S1/S2/S3 fibroblasts			GIM	71	M
	Patient54			BEST2/CAM/0796				IF for MUC5AC/MUC6/GPA33/OLFM4; IF for S1/S2/S3 fibroblasts			GIM	63	F
	Patient55			BEST2/CAM/0808				IF for S1/S2/S3 fibroblasts			GIM	69	M
	Patient56			PS18.18223				IF for S1/S2/S3 fibroblasts			BE

## Sheet: EGA_metadata
sample (EGA tracking)	scRNA_subject	gender	source	Tissue (manuscript)	Ethic approval ID
SLX-12927.SIGAE2	1	Male	Normal Oesophagus	NE	01/149
SLX-12927.SIGAF2	1	Male	Normal Squamo-columnar junction	N-SCJ	01/149
SLX-12927.SIGAG2	1	Male	Normal gastric cardia	NG	01/149
SLX-14096.SIGAC9	2	Female	Normal Oesophagus	NE	01/149
SLX-14096.SIGAD9	2	Female	Normal Squamo-columnar junction	N-SCJ	01/149
SLX-14096.SIGAE9	2	Female	Normal gastric cardia	NG	01/149
SLX-14961.SIGAA5	3	Female	Normal Oesophagus	NE	01/149
SLX-14961.SIGAB5	3	Female	Squamo-columnar junction between BE and NE	B-SCJ	01/149
SLX-14961.SIGAC5	3	Female	Barrett's Oesophagus	BE	01/149
SLX-14961.SIGAD5	3	Female	Normal gastric cardia	NG	01/149
SLX-15296.SIGAF11	5	Male	Normal Oesophagus	NE	15/EE/0152
SLX-15296.SIGAG11	5	Male	Normal Squamo-columnar junction	N-SCJ	15/EE/0152
SLX-15296.SIGAH11	5	Male	Normal gastric cardia	NG	15/EE/0152
SLX-15694.SIGAA4	7	Male	Normal Oesophagus	NE	01/149
SLX-15694.SIGAB4	7	Male	Squamo-columnar junction between BE and NE	B-SCJ	01/149
SLX-15694.SIGAC4	7	Male	Barrett's Oesophagus	BE	01/149
SLX-15694.SIGAD4	7	Male	Normal gastric cardia	NG	01/149
SLX-15694.SIGAE4	7	Male	Normal duodenum	ND	01/149
SLX-15694.SIGAA5	10	Female	Normal Oesophagus	NE	15/EE/0152
SLX-15694.SIGAB5	10	Female	Normal Squamo-columnar junction	N-SCJ	15/EE/0152
SLX-15694.SIGAC5	10	Female	Normal gastric cardia	NG	15/EE/0152
SLX-15694.SIGAD5	10	Female	Submucosal gland	SMG	15/EE/0152
SLX-15696.SIGAD7	8	Male	Normal Oesophagus	NE	01/149
SLX-15696.SIGAE7	8	Male	Normal Squamo-columnar junction	N-SCJ	01/149
SLX-15696.SIGAF7	8	Male	Normal gastric cardia	NG	01/149
SLX-15696.SIGAG7	8	Male	Normal duodenum	ND	01/149
SLX-15730.SIGAA4	11	Female	Submucosal gland	SMG	15/EE/0152
SLX-15730.SIGAD9	9	Male	Normal Oesophagus	NE	01/149
SLX-15730.SIGAE9	9	Male	Squamo-columnar junction between BE and NE	B-SCJ	01/149
SLX-15730.SIGAF9	9	Male	Barrett's Oesophagus	BE	01/149
SLX-15730.SIGAG9	9	Male	Normal gastric cardia	NG	01/149
SLX-15730.SIGAH9	9	Male	Normal duodenum	ND	01/149
SLX-16368.SIGAC3	12	Female	Barrett's Oesophagus	BE	01/149
SLX-16368.SIGAD3	12	Female	Normal gastric cardia	NG	01/149
SLX-16368.SIGAE3	12	Female	Normal duodenum	ND	01/149
SLX-16801.SIGAC8	13	Female	Submucosal gland	SMG	15/EE/0152
SLX-16801.SIGAD8	13	Female	Normal Squamo-columnar junction	N-SCJ	15/EE/0152
SLX-16801.SIGAE8	13	Female	Normal gastric cardia	NG	15/EE/0152

## Sheet: Pathology and progression 
Study ID	Patient	Diagnosis of scRNA-seq sample	Followup since research biopsy	Pathology of the most recent biopsy	Pathology and progression information
AHM1557	Patient03	NDBE	4 years	Gastric metaplasia	No progression and patient remained as gastric metaplasia under current surveillance. Note, the patient was previously diagnosed with high grade dysplasia at the time of research biopsy collection followed by radiofrequency ablation treatment.
AHM1994	Patient07	NDBE	4 years	Barrett’s esophagus with no dysplasia	No progression and remained as Barrett’s esophagus with intestinal metaplasia under current surveillance.
AHM0163	Patient09	NDBE	4 years	Barrett’s esophagus with no dysplasia	No progression and patient remained as Barrett’s esophagus with intestinal metaplasia under current surveillance. Note, the patient was previously (9 years prior to scRNA-seq sample collection) diagnosed with low grade dysplasia followed by radiofrequency ablation treatment.
AHM1997	Patient12	E-GM	4 years	Barrett’s esophagus with no dysplasia	Patient diagnosed with dysplasia at the time of scRNA-seq bipsy collection and received three radiofrequency ablation treatments. The most recent (3 years after collection of scRNA-seq sample) was Barrett’s esophagus with intestinal metaplasia and no dysplasia.
AHM2146	Patient14	GIM	3 years	Gastric atrophy and intestinal metaplasia	No progression and patient remained as gastric intestinal metaplasia.
AHM2269	Patient16	GIM and CIM	2 years	Gastric atrophy and intestinal metaplasia	No progression and patient remained as gastric intestinal metaplasia.
AHM2074	Patient17	GIM and CIM	2 years	Gastric atrophy	The patient was diagnosed with gastric dysplasia in 15 months after scRNA-seq biopsy colletion
AHM1661	Patient18	E-GM	2 years	Barrett’s esophagus with no dysplasia	No progression and remained as Barrett’s esophagus with intestinal metaplasia under current surveillance.
AH0197	Patient19	NDBE	NA	Barrett’s esophagus with no dysplasia	No progression and patient remained as gastric metaplasia under current surveillance. Note, the patient was previously diagnosed (10 years prior to scRNA-seq biopsy collection) with low grade dysplasia followed by radiofrequency ablation treatment.
AHM1564	Patient20	E-GM	2 years	Barrett’s esophagus with no dysplasia	No progression and remained as Barrett’s esophagus with intestinal metaplasia under current surveillance.
AHM2247	Patient21	GIM and CIM	NA	Cardia intestinal metaplasia	Progression unknow as the patient was only sampled once. The patient was diagnosed with Cardia intestinal metaplasia
AHM2320	Patient22	GIM and CIM	NA	Gastric atrophy and intestinal metaplasia	Progression unknow as the patient was only sampled once.
