# Supplementary material for: Single-cell RNA sequencing unifies developmental programs of Esophageal and Gastric Intestinal Metaplasia
Source: Cancer Discov. Author manuscript; Available in PMC 2023 Jun 23. (PMC10236154; doi:10.1158/2159-8290.CD-22-0824)
Supplement: Table S2 [file EMS172799-supplement-Table_S2.xlsx]

## Sheet: 1
Top	p.value	FDR	summary.logFC	logFC.2	logFC.3	logFC.4	logFC.5	logFC.6	logFC.7	logFC.8	logFC.9	logFC.10	logFC.11	logFC.12	logFC.13	logFC.14	logFC.15	logFC.16	logFC.17	logFC.18	logFC.19	logFC.20	logFC.21	logFC.22	logFC.23	logFC.24	logFC.25	logFC.26	logFC.27	logFC.28	logFC.29	logFC.30	logFC.31	GeneName
8	0	0	0.485913	0.140601	0.398766	0.416172	0.257359	0.272125	0.373772	0.486441	0.278548	0.264704	0.218884	0.266869	0.492564	0.49359	0.399652	0.337839	0.520787	0.283044	0.39512	0.434968	0.138706	0.556896	0.484621	0.536731	0.446053	0.485895	0.521377	0.2346	0.485913	0.526881	0.423271	ADH1C
18	0	0	0.152874	0.0390947	0.182312	0.117122	0.164434	0.174706	0.271506	0.11197	0.147822	0.156378	0.159464	0.152392	0.108452	0.163801	0.285852	0.0931078	0.198664	0.091084	0.104934	0.13739	0.0454452	0.0932009	0.122177	0.14108	0.120499	0.146405	0.173868	0.0702157	0.152874	0.132488	0.17782	CA9
50	0	3.82296e-308	0.0892389	0.0154583	0.104762	0.0659016	0.0853572	0.0808837	0.0988411	0.0726634	0.0771461	0.0862951	0.0691546	0.0856094	0.0723822	0.091993	0.0840957	0.0547666	0.0802649	0.0352066	0.0848444	0.0730892	0.0296058	0.0700673	0.0797801	0.0789662	0.064029	0.0854668	0.0797933	0.0292489	0.0892389	0.0799358	0.100226	KCNE3
51	6.96566e-170	1.47391e-168	0.0793079	0.00734296	0.0803588	0.0371704	0.0280928	0.0583859	0.0305333	0.0611209	0.0769461	0.0597826	0.0910316	0.0803046	0.0506098	0.0802389	0.0424382	0.0203087	0.08774	0.0389149	0.0543549	0.046606	0.0372362	0.0424091	0.0515412	0.0798778	0.0563822	0.0241523	0.0829918	0.0221163	0.0626617	0.0793079	0.0917353	UQCC2
64	0	0	0.232757	0.0105157	0.265143	0.115576	0.212924	0.195994	0.210257	0.15463	0.106616	0.211829	0.197447	0.188947	0.174903	0.253283	0.253325	0.054131	0.171119	0.0452531	0.203122	0.209964	0.00515687	0.156145	0.217809	0.240096	0.00618105	0.131912	0.104013	0.0844329	0.232757	0.234465	0.284239	TM9SF3
66	1.29919e-214	3.87309e-213	0.0389855	0.00261594	0.0531972	0.0227152	0.016941	0.0173404	0.0504054	0.0272766	0.0241618	0.0240693	0.0216715	0.0214704	0.0235518	0.0410945	0.0528357	0.0131274	0.0474875	0.0330079	0.0360226	0.0268749	0.0116026	0.0213943	0.0389855	0.0356254	0.035353	0.0333087	0.0428093	0.0254573	0.0326158	0.0308624	0.0527388	IMPDH1
81	0	0	0.0757604	0.000582462	0.0963498	0.00997818	0.079693	0.0746452	0.0732897	0.0494093	0.0433823	0.0737265	0.0573182	0.0660127	0.0623097	0.0809034	0.0755563	0.00575332	0.0478231	0.0255675	0.0789417	0.0640457	0.0267072	0.051301	0.0734616	0.0757604	0.0232235	0.0540345	0.0568206	0.0227072	0.0773487	0.0726542	0.0813021	TSPAN15
88	1.38096e-286	6.52321e-285	0.052391	0.00703559	0.0610341	0.0406504	0.0490055	0.046287	0.0478704	0.0455667	0.0430549	0.0479088	0.0591553	0.0504014	0.0460572	0.0571635	0.0509682	0.0206422	0.0442876	0.00172779	0.0418432	0.052391	0.0146608	0.0404157	0.0544926	0.0564395	0.00879245	0.0274835	0.00622881	0.00731968	0.0588136	0.0556001	0.0543404	DDAH1
104	3.53938e-91	3.04681e-90	0.0842843	0.0156332	0.0372068	0.0489766	0.00330248	0.0211418	0.0343379	0.0119748	0.0407664	0.0388142	0.0954444	0.0714542	0.0229836	0.0686911	0.0264961	0.0302705	0.0665427	0.0334574	0.0534687	0.0253524	0.0212008	0.0211265	0.0278613	0.0574157	0.0309926	0.00661737	0.0750701	0.0069611	0.0283979	0.0524924	0.0842843	SNRPC
111	1.18275e-110	1.34556e-109	0.0480916	0.0167746	0.0312134	0.0350417	0.004194	0.0140122	0.0276047	0.00421379	0.0240662	0.0284821	0.0552475	0.0528981	0.00770437	0.0414511	0.00437514	0.0266849	0.0395019	0.021826	0.0237449	0.028813	0.00862447	0.01641	0.0249482	0.0317974	0.028942	0.00986773	0.0386663	0.0041292	0.0290835	0.0305194	0.0480916	MRPL24
137	6.6281e-211	1.93298e-209	0.18788	0.100058	0.0636102	0.0772186	0.00412323	0.0939656	0.128516	0.124316	0.0293637	0.111183	0.0739713	0.101116	0.15441	0.197736	0.211243	0.18788	0.170982	0.0788587	0.188238	0.159392	0.117638	0.199827	0.153534	0.211855	0.0974175	0.0962355	0.0888838	0.027983	0.0945035	0.205443	0.204366	HIST1H4C
140	4.65298e-258	1.88696e-256	0.107041	0.0102146	0.15837	0.0332839	0.00987456	0.0101835	0.0540905	0.0486199	0.0488416	0.018475	0.0386044	0.0203493	0.0435951	0.114165	0.0989896	0.0317835	0.0835583	0.0266114	0.102872	0.107041	0.0215621	0.015094	0.100122	0.0675734	0.0587232	0.0332971	0.0369996	0.0183017	0.0986524	0.0632259	0.178028	TMEM238
144	1.94799e-258	7.92862e-257	0.0890564	0.0209838	0.0609527	0.0664649	0.0557304	0.0605578	0.0543092	0.0871527	0.0328807	0.0539065	0.0686692	0.0468234	0.0890564	0.0703073	0.0645327	0.0462063	0.0583637	0.036703	0.0494053	0.0720192	0.0281985	0.0684805	0.0796112	0.0775474	0.0459967	0.0198632	0.051873	0.00894367	0.0638952	0.080776	0.0565486	BIK
145	7.69217e-267	3.27802e-265	0.0506494	0.00101595	0.046332	0.00296179	0.0424595	0.0453045	0.0584567	0.0418935	0.0100566	0.0458731	0.063461	0.0466917	0.0441421	0.0509648	0.0299264	0.00538303	0.0407002	0.00665934	0.0370671	0.0506494	0.00523007	0.0321295	0.0491281	0.0473161	0.00677296	0.0330871	0.0323473	0.0145836	0.00344544	0.0480726	0.0495517	TC2N
157	0	0	0.21216	0.0478182	0.183293	0.21216	0.0581585	0.0997064	0.208233	0.170294	0.158156	0.148722	0.248881	0.192772	0.16913	0.217806	0.201926	0.147041	0.168158	0.104623	0.172058	0.167185	0.0985007	0.194351	0.212809	0.226374	0.0934392	0.143735	0.118672	0.059904	0.168907	0.225866	0.278074	MZT2B
164	1.64078e-213	4.84405e-212	0.177146	0.0138784	0.14584	0.0827127	0.061064	0.0707846	0.0282954	0.0683051	0.00188611	0.0847372	0.146397	0.124275	0.0451941	0.0552293	0.106296	0.0489906	0.121726	0.053695	0.0345572	0.0995861	0.0161453	0.0567229	0.11237	0.0313186	0.00540744	0.056824	0.125591	0.0624322	0.0941665	0.0131214	0.177146	MYDGF
166	0	0	0.151981	0.0349749	0.0786289	0.151981	0.0525589	0.0510304	0.138514	0.110796	0.0449476	0.137729	0.227787	0.181088	0.0872125	0.158974	0.0286606	0.0764714	0.0993615	0.0521665	0.150271	0.0378905	0.0358602	0.0897312	0.0941447	0.166973	0.0665859	0.0571076	0.0783438	0.021124	0.0565246	0.160992	0.166776	HIGD2A
177	0	0	0.131589	0.00274799	0.118047	0.0710384	0.048374	0.0804203	0.111215	0.108345	0.0781363	0.0906336	0.16223	0.140768	0.107394	0.125408	0.0610923	0.0170277	0.0657516	0.028924	0.115362	0.109658	0.0668366	0.0921498	0.120586	0.131589	0.0830273	0.0885585	0.0612093	0.0473458	0.111907	0.128631	0.138242	MRPL14
194	0	0	0.157311	0.033429	0.149784	0.0820924	0.0351981	0.0618908	0.1063	0.108746	0.0913659	0.0949211	0.143878	0.119658	0.113209	0.148405	0.0690842	0.0702562	0.135334	0.0636027	0.102021	0.126913	0.0733858	0.128547	0.132195	0.157881	0.0700056	0.10825	0.118344	0.0449762	0.119285	0.157311	0.170978	CENPX
198	9.37469e-149	1.63075e-147	0.0457099	0.00307925	0.0232322	0.0139179	0.0345508	0.0330517	0.0477253	0.0291919	0.025849	0.0337727	0.0279423	0.0308411	0.0281342	0.047445	0.0453375	0.0103695	0.0358311	0.0242258	0.0200415	0.0398913	0.00488043	0.0438744	0.0437541	0.0451595	0.023564	0.0458621	0.031389	0.0204746	0.0457099	0.0447799	0.0477654	FUT8
206	2.28418e-223	7.27511e-222	0.0681902	0.00181223	0.0553073	0.0326104	0.00472395	0.0270178	0.0475721	0.0334377	0.0498072	0.00494137	0.0604812	0.0321846	0.0272072	0.0681902	0.0399362	0.00778721	0.028403	0.0088163	0.0487592	0.0219834	0.0241901	0.0375971	0.0350851	0.0604312	0.00604322	0.036685	0.0326346	0.0223579	0.0373815	0.0600385	0.0733506	EIF4E2
258	4.8237e-157	9.09372e-156	0.0918981	0.0134796	0.0830234	0.054198	0.0325589	0.0471407	0.0683788	0.084089	0.0589927	0.0543724	0.0775639	0.0689123	0.0918981	0.0861705	0.0341356	0.0304626	0.100203	0.0526588	0.0422699	0.0832014	0.0298673	0.0843173	0.0872455	0.0877505	0.0315848	0.0663839	0.113627	0.0382245	0.0841588	0.0783625	0.100599	LRRC59
267	1.43845e-147	2.47653e-146	0.0533297	0.00230615	0.0339922	0.0221637	0.011639	0.0181895	0.0408114	0.0275395	0.0238829	0.0156348	0.0390626	0.0266315	0.0409149	0.0533297	0.0536991	0.0250084	0.0502007	0.0236044	0.0399318	0.0354416	0.0157235	0.042213	0.0422156	0.0528429	0.0243015	0.0196574	0.0495273	0.0132388	0.0376956	0.0533667	0.0588001	EIF3B
275	1.09373e-266	4.65503e-265	0.10865	0.0138873	0.0906462	0.0601968	0.00160236	0.0381376	0.106398	0.0547354	0.0398064	0.0591111	0.0808725	0.0715302	0.0742157	0.126607	0.110429	0.0362725	0.123522	0.0431073	0.117683	0.0744962	0.0585567	0.0852697	0.102713	0.10865	0.0269142	0.0693715	0.0951174	0.00990655	0.0722159	0.105419	0.156089	HNRNPAB
285	2.61935e-194	6.78362e-193	0.0477521	0.0139478	0.0334583	0.0328231	0.0146114	0.0223084	0.0272999	0.034339	0.0301254	0.0297615	0.0367494	0.0311054	0.0344687	0.0477521	0.0432887	0.0308222	0.0232198	0.00770099	0.0460282	0.0311127	0.0207789	0.0237467	0.0322177	0.0435209	0.0224595	0.025675	0.0207128	0.00465316	0.0394004	0.0405414	0.0566743	BRI3BP
289	1.56138e-177	3.52157e-176	0.130294	0.0187766	0.0263097	0.049217	0.0314265	0.0355984	0.0300722	0.0133272	0.0435008	0.0748563	0.0809872	0.0877516	0.0287767	0.0903874	0.0781326	0.0457757	0.101927	0.0405948	0.0832369	0.0326056	0.0336083	0.0481036	0.0573421	0.0895238	0.0409939	0.0120045	0.0708028	0.00224698	0.0298757	0.0879386	0.130294	HNRNPD
289	1.11006e-193	2.85282e-192	0.0700175	0.0145657	0.0262595	0.0700175	0.00322151	0.011345	0.0394539	0.0460854	0.0213144	0.0029337	0.0340969	0.0221029	0.065586	0.0607391	0.0254019	0.0308123	0.0489401	0.0276889	0.0430507	0.0417218	0.0306693	0.0717963	0.046301	0.075613	0.0353385	0.0524631	0.0532872	0.0196098	0.0297285	0.075288	0.0526209	TOMM5
294	8.71046e-115	1.04147e-113	0.0174138	0.00582349	0.0137205	0.0127618	0.00754754	0.0080538	0.0187727	0.0155616	0.000532662	0.00589944	0.00803381	0.00512496	0.0173803	0.0164221	0.00367864	0.00812561	0.0122431	0.00897765	0.0131051	0.0121728	0.00173804	0.0212649	0.0126499	0.0179921	0.00757461	0.0174138	0.00787327	0.00578217	0.0170238	0.0170714	0.00961936	PCAT18
297	2.4992e-204	6.9043e-203	0.0458649	0.00468294	0.0510686	0.0136416	0.0264774	0.0237994	0.0310558	0.00882854	0.00461828	0.0288863	0.0325314	0.0333264	0.0140533	0.0503819	0.00289432	0.0157639	0.0266694	0.00803783	0.0235655	0.029142	0.00852025	0.0230313	0.0300249	0.0456679	0.0137597	0.01189	0.0315828	0.0042513	0.0458649	0.0448307	0.0444143	CTBP2
308	3.36256e-217	1.02058e-215	0.0812474	0.0210028	0.0270782	0.0535689	0.0237298	0.0225771	0.0566799	0.0438425	0.0438881	0.0418352	0.0287946	0.0383935	0.0601497	0.082605	0.0678027	0.05235	0.0736895	0.0371421	0.0639839	0.0491923	0.0434991	0.0790876	0.0609083	0.0812474	0.0312175	0.0538955	0.0552285	0.0189826	0.0505892	0.0827821	0.0880668	TMPO
310	3.0294e-147	5.18896e-146	0.0692364	0.030557	0.0426786	0.0692364	0.0167549	0.031465	0.0579283	0.0473545	0.0405513	0.0614091	0.0678175	0.0722548	0.0549353	0.0883786	0.0576555	0.0421059	0.0787571	0.0484288	0.0731609	0.0497359	0.0491292	0.0592679	0.0621976	0.0801648	0.0540878	0.0541985	0.0736211	0.0167091	0.0481741	0.0762105	0.0841212	RPA3
312	4.62358e-173	1.00431e-171	0.157131	0.0271227	0.0212348	0.0935779	0.00724771	0.031019	0.0431312	0.0142169	0.0168841	0.0402052	0.121906	0.108045	0.00952182	0.121837	0.0390024	0.0587721	0.0887687	0.0271869	0.0744483	0.0361807	0.0167628	0.0185255	0.0219232	0.1106	0.0597991	0.00579294	0.0969817	0.00854335	0.0160111	0.0995321	0.157131	C19orf53
349	3.57706e-104	3.7443e-103	0.0150746	0.00240015	0.0100292	0.00707323	0.00723374	0.00430291	0.0051354	0.00813376	0.00681158	0.0121449	0.0135011	0.0140107	0.00837086	0.010723	0.0112527	0.00405397	0.0132548	0.00663257	0.00481509	0.01003	0.00118675	0.00852957	0.0119789	0.0112222	0.00228231	0.00540372	0.015167	0.00254347	0.0106569	0.010891	0.0150746	ALG1
360	2.70659e-186	6.5211e-185	0.0575582	0.00238825	0.0168417	0.0135416	0.00770061	0.00490109	0.00670334	0.0176985	0.00615238	0.0128597	0.00452623	0.0021931	0.0267052	0.0471956	0.00398336	0.00864538	0.0265064	0.00845147	0.0279836	0.0136551	0.0144621	0.019014	0.000215256	0.0575582	0.0112826	0.00296951	0.0299552	0.00825422	0.0275446	0.0550584	0.0469927	WDR45B
378	7.45104e-163	1.47778e-161	0.107108	0.00309773	0.073749	0.0190387	0.046734	0.0501762	0.0792562	0.0379229	0.00540679	0.0374205	0.0659979	0.0309774	0.0523661	0.0777958	0.0444686	0.0202794	0.078164	0.00884617	0.0703692	0.0596255	0.0101606	0.0506741	0.0617023	0.0685458	0.0207372	0.0522548	0.050959	0.00579331	0.0571125	0.0653342	0.107108	CLINT1
384	6.59302e-138	1.03085e-136	0.0198435	0.00119006	0.0253422	0.00741507	0.0201618	0.017611	0.0279873	0.0179322	0.0159185	0.0193122	0.0186612	0.0173257	0.0168373	0.0218202	0.0176391	0.00191373	0.00513312	0.00159329	0.015596	0.0150783	0.00158783	0.0183838	0.0198435	0.0192766	0.00459434	0.0211487	0.00765727	0.000103586	0.0207335	0.0207497	0.0223996	BCL2L14
395	2.99238e-156	5.59724e-155	0.0164667	0.00383195	0.0221494	0.0106345	0.0254345	0.0164597	0.020855	0.0154794	0.013923	0.0160563	0.0177392	0.00114301	0.0131699	0.0181164	0.0153944	0.00881742	0.0139542	0.0110994	0.0140812	0.0164667	0.000690462	0.0109831	0.0168892	0.0139336	0.0115877	0.0145913	0.0134764	0.00611821	0.0161734	0.0138218	0.0187402	EYA2
411	2.42106e-159	4.66652e-158	0.0480291	0.0044428	0.0333135	0.0192526	0.0208851	0.0221715	0.0286248	0.0138909	0.0140561	0.0187442	0.016393	0.0183961	0.0291866	0.0412658	0.0410879	0.0181137	0.0415152	0.023352	0.0392253	0.0358925	0.0125373	0.0266898	0.0350586	0.0386516	0.0272045	0.0194515	0.0343289	0.0190716	0.0335333	0.0371168	0.0480291	MED24
414	6.82438e-162	1.34002e-160	0.0843184	0.0140967	0.0653371	0.0524849	0.0261544	0.0458111	0.0404438	0.0411042	0.0609241	0.0352266	0.0868974	0.0766136	0.0432766	0.0843184	0.0316117	0.0338174	0.0441604	0.0234479	0.0685825	0.050261	0.021248	0.0321487	0.0568034	0.0670829	0.0397512	0.0364015	0.0240378	0.00626703	0.0574319	0.0671511	0.0954022	COA4
419	2.77163e-158	5.28753e-157	0.0614023	0.00225992	0.027938	0.0151515	0.00081512	0.0215333	0.0383416	0.0159846	0.0171596	0.026594	0.0538146	0.0416753	0.0145952	0.0491709	0.00791468	0.0127777	0.034281	0.00878076	0.049069	0.02658	0.0179386	0.0195977	0.0212858	0.0385868	0.0180854	0.0167717	0.0236335	0.00900639	0.0252155	0.0365559	0.0614023	PFDN6
440	1.98651e-122	2.61269e-121	0.0199672	0.00975528	0.0201751	0.0162101	0.00760857	0.00720118	0.0176905	0.0141715	0.00667175	0.0172959	0.0192968	0.0190835	0.0170818	0.0225654	0.0103442	0.0151882	0.0274242	0.0152575	0.0168214	0.0199672	0.00840333	0.0168206	0.0186731	0.0208062	0.00899556	0.016953	0.0254549	0.0073105	0.0205691	0.0204036	0.0231455	ECT2
453	3.0181e-155	5.59851e-154	0.0465603	0.00635675	0.0208513	0.0190365	0.00307468	0.00450255	0.0174608	0.0130716	0.0124912	0.00804535	0.0136855	0.00709752	0.0186788	0.0256533	0.0236847	0.0172338	0.0428791	0.0160549	0.0284892	0.00632875	0.0164477	0.0183975	0.0220236	0.026451	0.0202024	0.0152802	0.0149578	0.00362375	0.0164756	0.0231636	0.0465603	ALYREF
469	2.00079e-142	3.24952e-141	0.0809235	0.00579376	0.059432	0.0281187	0.00173978	0.00812791	0.0327704	0.00619649	0.000793309	0.0220352	0.0412168	0.0376082	0.0227869	0.0645026	0.0488375	0.0186597	0.0496734	0.0149869	0.0394585	0.0326059	0.00422816	0.0298523	0.0393446	0.0575098	0.025414	0.023567	0.0460986	0.013458	0.0478528	0.0583332	0.0809235	CCDC47
483	1.63774e-92	1.43787e-91	0.0297379	0.000721737	0.0144968	0.016299	0.00641071	0.00173157	0.0118998	0.0126048	0.018739	0.0122978	0.0109442	0.0146938	0.0106717	0.0298898	0.00540919	0.00778058	0.0206258	0.0105089	0.0228181	0.0105949	0.011697	0.0142041	0.0255339	0.0297379	0.010147	0.010919	0.0282814	0.00460056	0.0153366	0.0287509	0.03946	LSM12
487	1.20758e-109	1.3527e-108	0.0150766	0.00251149	0.0130486	0.0115888	0.00312324	0.007195	0.0102754	0.0016993	0.0114262	0.00837334	0.0251784	0.0128562	0.00669526	0.0175589	0.00503794	0.00693198	0.0142341	0.00721428	0.00813535	0.00142995	0.00173654	0.00866944	0.00574244	0.013678	0.00437765	0.00577606	0.0150489	0.00179307	0.0124385	0.0131994	0.0150766	IMPACT
492	6.85658e-148	1.18351e-146	0.0314183	0.00206155	0.0314183	0.00934589	0.0140886	0.0132399	0.000945141	0.014263	0.00803852	0.0177826	0.0109557	0.0189968	0.0207093	0.0292873	0.0148343	0.00654356	0.0269211	0.0154308	0.0239579	0.0275157	0.00126862	0.0140211	0.0262081	0.0324146	0.0102629	0.00427445	0.0290915	0.0114271	0.0289097	0.0315969	0.0265343	DAG1
505	4.46168e-158	8.48275e-157	0.0421305	0.0119443	0.0296501	0.0286351	0.0242133	0.0222685	0.00231745	0.0334537	0.0241557	0.0318442	0.0350655	0.034039	0.0306384	0.0421305	0.0188418	0.019617	0.00916315	0.0100678	0.0169152	0.0267177	0.00885287	0.00881361	0.0291413	0.0383565	0.0287142	0.00775448	0.0161965	0.00345758	0.0258421	0.0383188	0.030712	MTHFS
528	4.95496e-151	8.83933e-150	0.0365226	0.00343485	0.0180386	0.0177769	0.00461537	0.00508951	0.0151864	0.012462	0.00406609	0.0144321	0.0149291	0.0158748	0.0207531	0.0309585	0.0316641	0.0152097	0.0215752	0.012246	0.0259269	0.0114683	0.0146169	0.0228546	0.0224075	0.0350333	0.00742898	0.00353017	0.00915576	0.00694176	0.0236907	0.0365226	0.0300911	KHSRP
564	1.98962e-143	3.26457e-142	0.065652	0.00931513	0.0585404	0.044631	0.0271674	0.0389884	0.0464026	0.0544374	0.0424462	0.0588907	0.0774623	0.0820481	0.0578129	0.0639771	0.0623221	0.0281437	0.0507997	0.0223662	0.0456581	0.0554991	0.0157028	0.0594817	0.0565458	0.0693596	0.0207584	0.0370407	0.064452	0.0111728	0.065652	0.0645952	0.0774449	ZNF593
571	5.85789e-108	6.43715e-107	0.051313	0.00413902	0.0276595	0.00985598	0.023564	0.00656565	0.0258477	0.0234995	0.023421	0.0303444	0.0315737	0.0325519	0.0284221	0.0496875	0.0430648	0.0210879	0.0442277	0.0185342	0.0368375	0.0263248	0.0160907	0.0375808	0.0333699	0.051313	0.0119564	0.00292255	0.0475405	0.0107016	0.0331436	0.0502718	0.057964	TRIM28
601	2.63275e-141	4.21466e-140	0.0575282	0.00703787	0.0253203	0.0256064	0.00995206	0.012898	0.0187973	0.0161187	0.0110341	0.0237027	0.033102	0.0259935	0.0345563	0.045722	0.0387346	0.0183595	0.0475019	0.0218383	0.0378496	0.0265041	0.018383	0.0526495	0.0365073	0.0575282	0.0155252	0.0184121	0.0304094	0.0145644	0.03559	0.0561317	0.0548808	DHX15
613	5.96799e-62	3.16851e-61	0.0198326	0.00872395	0.015265	0.0196422	0.00688367	0.0105779	0.0520142	0.00980135	0.0352631	0.0118511	0.00678268	0.0054612	0.00647842	0.00596049	0.0249912	0.013052	0.0504122	0.0276056	0.0485185	0.0198326	0.00687579	0.004026	0.0200179	0.00987712	0.041004	0.0256272	0.0117599	0.0239879	0.0199321	0.00771585	0.0328941	ORM1
678	9.28372e-44	3.59784e-43	0.00574611	0.00264775	0.00678247	0.00533513	0.00192063	0.00540123	0.00712698	0.00487722	0.00315684	0.00680632	0.012328	0.00800541	0.00379193	0.00632143	0.00619305	0.00598396	0.00941719	0.00414731	0.00760701	0.00574611	0.00433674	0.00485063	0.00652513	0.00531886	0.00363207	0.00623771	0.00692588	0.000561284	0.00637571	0.00567531	0.00790314	KIF4A
693	6.37273e-59	3.20914e-58	0.00944592	0.00455278	0.00351561	0.00761187	0.000859582	0.00245607	0.00872898	0.00769268	0.00472824	0.0086821	0.0146361	0.00985266	0.00766273	0.00937894	0.00880364	0.00845304	0.0109869	0.00684051	0.00895555	0.00734138	0.00571733	0.00774278	0.00944592	0.00942983	0.00626041	0.00826918	0.00951138	0.000175807	0.00782611	0.00930509	0.0107942	SGO1
738	1.18084e-38	4.21982e-38	0.0367123	0.00206261	0.025107	0.0062	0.0220069	0.0227885	0.0367123	0.0124443	0.028226	0.0205889	0.0190093	0.022094	0.00947349	0.0171411	0.0356587	0.00920386	0.0107278	0.00482947	0.0258395	0.0160514	0.00267683	0.000479754	0.0136487	0.0121757	0.0059035	0.0155174	0.00237298	0.00676776	0.0135358	0.0116834	0.0104771	ALB
801	7.89006e-49	3.33228e-48	0.00825843	0.00321731	0.00596729	0.00656607	0.00108026	0.00180241	0.00552455	0.00692546	0.0016291	0.00215816	0.000694032	0.00157566	0.00690832	0.00837902	0.00540026	0.00788265	0.00835309	0.00288654	0.00804527	0.00513713	0.00630978	0.00981428	0.00653905	0.00850075	0.00507892	0.00825843	0.00871071	0.000664873	0.00822741	0.00791178	0.00848066	IQGAP3
812	5.89108e-135	8.94814e-134	0.0588119	0.014456	0.0653366	0.0335197	0.0194286	0.0281617	0.0358972	0.0241539	0.0479496	0.0453275	0.0798638	0.0544562	0.0295336	0.0644975	0.0450406	0.0252737	0.0231262	0.0184218	0.0457001	0.0536559	0.0117806	0.0236179	0.0492602	0.0588119	0.0231999	0.0184826	0.0270235	0.00338422	0.0505445	0.0508793	0.07493	POLR2H
837	1.43153e-121	1.85871e-120	0.0706193	0.0140826	0.0526042	0.0402614	0.0181561	0.0212731	0.0232298	0.0180091	0.0355061	0.0384837	0.0526698	0.0560118	0.0157933	0.0706193	0.0144594	0.0339612	0.0586133	0.0208217	0.0395144	0.035594	0.0125577	0.023811	0.0368393	0.0522466	0.029675	0.0138325	0.0389459	0.00031168	0.0224864	0.0537495	0.0769831	METTL26
850	1.01945e-66	5.8565e-66	0.0141819	0.00823779	0.00143074	0.0139943	0.0118036	0.00639384	0.0054561	0.0149539	0.0135123	0.0162868	0.0202457	0.0153006	0.0120135	0.0209548	0.00631189	0.0147591	0.0218661	0.0133766	0.00826105	0.0141819	0.000764821	0.0154213	0.00995069	0.0153966	0.00969183	0.0123559	0.0196957	0.00197274	0.0183643	0.0136901	0.0201094	CDCA7L
857	3.5491e-119	4.46305e-118	0.0278203	0.000726547	0.0170199	0.0072131	0.00908114	0.0138993	0.0164215	0.0133881	0.0240748	0.0143483	0.0202061	0.0157857	0.0179978	0.0278203	0.0157643	0.00340099	0.016256	0.00792438	0.0219135	0.0154241	0.00888667	0.0149379	0.0164756	0.0219059	0.00575925	0.0148243	0.019052	0.00262962	0.0174648	0.0218313	0.0272603	FRAT2
859	4.91017e-93	4.34619e-92	0.0072171	0.000594478	0.00909344	0.00388634	0.00343885	0.00426351	0.00402392	0.00632156	0.00665304	0.00398569	0.00713667	0.00530833	0.00620823	0.00655757	0.00504708	0.000696597	0.00632316	0.00395749	0.00508216	0.0072171	0.00308546	0.00451074	0.00576127	0.00650411	0.00456653	0.00537064	0.00719172	0.00324552	0.00688531	0.00621456	0.00714308	LINC00992
890	2.69761e-141	4.31644e-140	0.0586425	0.000683339	0.060145	0.0264399	0.0108847	0.0335225	0.0322096	0.0291965	0.0266055	0.0236433	0.0718575	0.0462107	0.0267392	0.0638386	0.0130799	0.0136684	0.0135386	0.00753227	0.0400376	0.0497841	0.0211615	0.0214036	0.0511587	0.0586425	0.0106052	0.0150501	0.0203175	0.00721327	0.0532322	0.0580933	0.0712252	UQCC3
942	7.77052e-119	9.73143e-118	0.0366833	0.00173076	0.0191621	0.0122815	0.00289985	0.00419043	0.0235761	0.015574	0.0134521	0.0123229	0.00310322	0.00511209	0.0240255	0.0414801	0.0344547	0.00681926	0.0344728	0.017444	0.0308097	0.020232	0.0132527	0.0185077	0.0211225	0.0378245	0.0192481	0.0143741	0.0232866	0.0165539	0.0158854	0.0366833	0.0316421	NUP50
963	1.56806e-81	1.15939e-80	0.00947909	0.00510331	0.00973988	0.0093491	0.00708302	0.0067281	0.010475	0.0102606	0.00471889	0.00660452	0.004743	0.00613223	0.0108411	0.0120226	0.0135321	0.00827508	0.0127866	0.00900899	0.0116048	0.00947909	0.0021193	0.00810924	0.00973981	0.0123446	0.00785575	0.00779559	0.0118523	0.00328948	0.0111766	0.0121752	0.00922897	C2orf70
1084	3.40128e-111	3.89857e-110	0.0239232	0.00138492	0.013554	0.00741476	0.008358	0.0109532	0.00875662	0.00601882	0.0124866	0.00784515	0.0159324	0.0127064	0.0118608	0.0220656	0.000300311	0.00685102	0.0110616	0.00345812	0.0175447	0.0153195	0.00726324	0.00549668	0.00929208	0.0206252	0.013491	0.0038452	0.000948493	0.0091921	0.0198215	0.0204225	0.0239232	SLC25A13
1145	3.43216e-70	2.10589e-69	0.0165305	0.00530402	0.0113414	0.012447	0.0031591	0.00515165	0.00577612	0.00851153	0.00288664	0.00804717	0.00914952	0.00696443	0.00864777	0.0165305	0.0157197	0.0132565	0.0109465	0.00765936	0.0148193	0.0110353	0.00694363	0.011753	0.00767611	0.0163965	0.00897851	0.00649102	0.0111801	0.00313698	0.00675046	0.0144421	0.0125369	FPGS
1218	2.32442e-55	1.10077e-54	0.00487906	0.00119618	0.00588092	0.00275975	0.00383646	0.00332025	0.00540797	0.00394674	0.00313668	0.0035925	0.00340716	0.00307538	0.00475963	0.00604037	0.00586213	0.000683648	0.00546363	0.0036078	0.0040268	0.00487906	0.0037697	0.00562818	0.00508911	0.00612191	0.00443121	0.00570163	0.00496841	0.0031226	0.00562875	0.00601558	0.00568944	LYPD6
1294	3.41533e-59	1.73209e-58	0.00675142	0.0022302	0.00666798	0.00439414	0.0041695	0.00402835	0.00576828	0.00731632	0.00797783	0.00645426	0.00780809	0.00653046	0.00688805	0.00654072	0.00155037	0.00518723	0.0109829	0.00465264	0.00674963	0.00664916	0.00281768	0.00529462	0.00675142	0.0075528	0.00739286	0.00567532	0.0134239	0.00105458	0.00606509	0.00737056	0.0101213	SLC29A2
1317	1.68967e-81	1.24792e-80	0.0319947	0.00208082	0.00557263	0.0184299	0.00291938	0.00258198	0.0178553	0.00788158	0.0310127	0.0136988	0.043012	0.0318748	0.0103009	0.0374782	0.00402553	0.00718258	0.0240861	0.00975292	0.0276714	0.0175936	0.0157148	0.0185729	0.00758885	0.0319947	0.0171804	0.0109931	0.0145598	0.00762963	0.00011017	0.0293064	0.0400393	LLPH
1327	4.37671e-71	2.73906e-70	0.0352797	0.00476997	0.0188074	0.0153295	0.00199481	0.00300784	0.0203167	0.00980388	0.0115784	0.0203191	0.0256241	0.0246117	0.0181863	0.0205067	0.00530904	0.0141234	0.0295407	0.0116782	0.0258733	0.00964848	0.0142201	0.0200664	0.0267264	0.0274389	0.0157889	0.000602204	0.0094577	0.00433761	0.012705	0.0270669	0.0352797	STARD7
1330	1.27547e-47	5.27847e-47	0.00886196	0.00301039	0.00504148	0.00472265	2.67463e-05	0.000961062	0.000617123	0.000221896	0.00138055	0.00278288	0.00461491	0.00386944	0.000971802	0.00761895	0.00550768	0.00524176	0.00786973	0.00388713	0.00409266	0.000248133	0.00284755	0.00428994	0.00484401	0.00539226	0.00537355	0.00281812	0.00796798	7.56119e-05	0.00514835	0.00546611	0.00886196	MTHFD1L
1424	6.45972e-55	3.03086e-54	0.0107666	0.000914698	0.009866	0.00160716	0.00525754	0.00593634	0.00556598	0.0047367	0.00952361	0.00260522	0.00163908	0.00630629	0.00594593	0.00950771	0.000608661	0.000954656	0.0108393	0.00551896	0.0068959	0.00636929	0.00265689	0.00417168	0.00246161	0.0069791	0.00743556	0.00698717	0.0105493	0.0061407	0.00547023	0.00765416	0.0107666	NUP50-DT
1496	1.03415e-35	3.52367e-35	0.00240203	0.00171043	0.0019881	0.00265458	0.000558438	0.00081348	0.00142916	0.00284365	0.00019884	0.00132954	0.00115081	0.00132506	0.00218185	0.00249014	0.00139679	0.00271145	0.00241382	0.0018839	0.00178816	0.00240203	0.00136414	0.00220878	0.00324531	0.00299153	0.00257606	0.00097349	0.00108904	0.0001086	0.00234939	0.00299912	0.00302128	FAM81A
1528	6.04388e-43	2.30997e-42	0.00927678	0.00101891	0.0045998	0.00373233	0.00682578	0.00682367	0.0024286	0.00240833	0.0137665	0.00798764	0.0140475	0.00950328	0.00626307	0.00826234	0.0114899	0.00208769	0.0107251	0.00585239	0.00916076	0.00433369	0.00320038	0.00354183	0.00765088	0.00927678	0.003981	0.00166814	0.00982841	0.00443856	0.00298229	0.00970481	0.0113658	DCAF1
1619	4.90181e-87	3.96137e-86	0.0198684	0.000812135	0.0131199	0.010939	0.0095287	0.00860281	0.0134178	0.00204569	0.0116196	0.0144245	0.0193251	0.0148293	0.0106992	0.0198684	0.00259978	0.00481328	0.0187034	0.00791117	0.0113734	0.0100367	0.0060733	0.010151	0.0143426	0.0209495	0.0106987	0.00587252	0.0233873	0.00917107	0.0118296	0.0197141	0.0227735	UBP1
1712	6.73319e-85	5.24425e-84	0.0187269	0.000580781	0.0149609	0.00393535	0.00538233	0.00582657	0.0111116	0.00286658	0.0127335	0.00837219	0.0122365	0.0112404	0.00720025	0.014884	0.00351057	0.00238633	0.00929074	0.00288283	0.0136239	0.0108797	0.00472959	0.00720941	0.00818037	0.0137125	0.00443933	0.0101041	0.00854717	0.00180306	0.010966	0.0143229	0.0187269	TCAIM
1734	1.57255e-44	6.17639e-44	0.00363141	0.000453979	0.00337606	0.00214391	0.00103878	7.90309e-05	0.00117281	0.00281649	0.00289128	0.00269405	0.00305134	0.00293675	0.00113985	0.00366996	0.00336882	0.00247419	0.00349889	0.00258019	0.00317451	0.00363141	0.00227985	0.0033438	0.00340626	0.00342233	0.00197217	0.000843721	0.0030049	0.00116463	0.00372938	0.00340486	0.00408739	AADAT
1973	8.10509e-30	2.523e-29	0.00313111	0.000627486	0.00426608	0.0021705	0.00192199	0.00237247	0.00458399	0.00317835	0.00212026	0.00179158	0.00198132	0.00165121	0.00302945	0.00425989	0.004018	0.00169011	0.00445733	0.00262955	0.00423781	0.00313111	2.26694e-05	0.00314029	0.00306714	0.00420631	0.00339521	0.00367609	0.0045484	0.00159591	0.00376811	0.003845	0.00373084	FAM69C
2226	1.42009e-18	3.75399e-18	0.0015026	0.000669813	0.00154685	0.00139983	0.000196561	1.13276e-05	0.00161892	0.00140079	0.00073028	0.00136393	0.000552783	0.00124543	0.00125964	0.00136555	0.00119361	0.00146082	0.0025425	0.00161032	0.00140066	0.0015026	0.000984788	0.00129432	0.00119228	0.00134014	0.00156585	0.00144219	0.00172328	0.000681763	0.00162172	0.00122953	0.00219004	EXO1
2307	1.80844e-37	6.33966e-37	0.00652542	0.000944395	0.00438188	0.00689184	0.00245124	0.00671198	0.00294194	0.000796528	0.00804598	0.0055302	0.0117002	0.00988625	0.00327465	0.00976161	0.00312347	0.00283541	0.0100777	0.00181805	0.00673888	0.00652542	0.00223436	0.00109438	0.00554313	0.00864687	0.00321476	0.000933494	0.00582092	0.00045856	0.00156822	0.0082972	0.0108001	BNIP1
2312	2.44607e-50	1.06113e-49	0.008048	7.27027e-05	0.00229429	0.00194869	0.00156718	0.00226941	0.000991758	0.00267783	0.00436952	0.00291851	0.00641778	0.00383962	0.00483354	0.00609352	0.0044658	0.00172619	0.00256419	0.00199177	0.00527279	0.00274013	0.00168843	0.00679371	0.00268146	0.00555054	0.00343113	0.0023787	0.00487556	0.000375581	0.00154399	0.00618393	0.008048	DHX37
2451	1.71133e-37	6.00237e-37	0.00681031	0.00112162	0.00200662	0.00113976	0.00182213	0.00178588	0.00212518	0.00282151	0.00623892	0.00421783	0.00723514	0.00563973	0.00179089	0.00549546	0.00481257	0.00230626	0.00761309	0.00198168	0.00640177	0.00389081	0.00243965	0.0028051	0.00428445	0.00431583	0.00475114	0.00250194	0.00455804	0.000959148	0.00237325	0.00346129	0.00681031	POP1
2469	8.62289e-57	4.17609e-56	0.00934521	0.001637	0.00482862	0.00488182	0.000197086	0.000209949	0.003288	0.00449427	0.0076999	0.00463256	0.00897256	0.00376627	0.00576516	0.00934521	0.00673891	0.00417553	0.00906124	0.00474318	0.00735675	0.00524848	0.00471774	0.00608703	0.0075628	0.00787998	0.00434173	0.000437666	0.00941864	0.0026686	0.00509472	0.00812949	0.0100672	NUP205
2580	1.92368e-11	4.58733e-11	0.00104431	0.000595833	0.00104087	0.00103484	0.000140538	0.000150004	0.00124188	0.000912144	0.000762946	0.00118568	0.000441746	0.00118748	0.00104005	0.00104492	0.00157089	0.00107613	0.00095399	0.000548578	0.00111392	0.00104431	0.000840557	0.00104981	0.000996611	0.00113693	0.000498456	0.000913891	0.000755069	9.50461e-05	0.00113601	0.00108168	0.00108825	AP000251.1
2703	2.1426e-33	7.0298e-33	0.00487132	0.00102057	0.00384475	0.00241235	0.00140689	0.00284928	0.00437812	0.00331727	0.00116633	0.00551378	0.0111333	0.00639525	0.00267854	0.00485094	0.00405972	0.00286378	0.0078998	0.00412718	0.00533308	0.00487132	0.00204994	0.00226341	0.00505599	0.00434925	0.0029581	0.00329492	0.00538401	0.00242751	0.00280297	0.00420014	0.0063243	CCNF
2732	1.33631e-13	3.28693e-13	0.00134343	0.000999645	0.0011128	0.00116024	7.42846e-05	0.000250228	0.00126377	0.00114753	0.00025756	0.000281833	0.000130146	7.99992e-05	0.00120635	0.00145231	0.000935486	0.0012636	0.00161674	0.00108805	0.00110625	0.00134343	0.00102092	0.0010424	0.00136909	0.0012385	0.00128206	0.00132771	0.00164646	5.31312e-05	0.00060115	0.00130781	0.00137658	RDM1
3447	1.68017e-35	5.69993e-35	0.0055072	0.00125395	0.00303621	0.00141702	0.00190016	0.00090653	0.00149172	0.000997106	0.0021458	0.00187842	0.00271811	0.00167692	0.000459406	0.00506407	0.00506222	0.000806886	0.00178989	0.0016578	0.00342519	0.0025085	0.00122889	0.00194685	0.00242774	0.00446051	0.00262633	0.00196423	0.00288863	0.00167812	0.00349157	0.00385932	0.0055072	FAM149B1
4333	7.96574e-13	1.93717e-12	0.00138559	0.000373753	0.00138559	0.000586696	0.000860977	0.00290877	0.00104264	0.00116509	0.00182706	0.00361538	0.00692906	0.00466062	0.00128799	0.00128125	0.000517647	0.000606912	0.00192923	0.00114605	0.00112654	0.000373285	0.000415456	0.00110149	0.0016118	0.00128829	0.000848708	0.00153212	0.00297512	0.000729522	0.00143482	0.00123098	0.002289	LINC00853
4573	4.17894e-11	9.91463e-11	0.00188198	0.000405681	0.000989937	0.00119823	0.000117035	0.000340318	0.00158154	0.00184103	0.00172336	6.16295e-05	3.83538e-05	3.92291e-05	0.00123299	0.00131923	0.00216958	0.000126152	0.00310339	0.00147453	0.00173725	0.00133403	0.000509879	0.00107626	0.00200613	0.00188198	0.000905391	0.00213421	0.00149078	0.000585181	0.00190192	0.00108541	0.00222771	AC009509.1

## Sheet: 2
Top	p.value	FDR	summary.logFC	logFC.1	logFC.3	logFC.4	logFC.5	logFC.6	logFC.7	logFC.8	logFC.9	logFC.10	logFC.11	logFC.12	logFC.13	logFC.14	logFC.15	logFC.16	logFC.17	logFC.18	logFC.19	logFC.20	logFC.21	logFC.22	logFC.23	logFC.24	logFC.25	logFC.26	logFC.27	logFC.28	logFC.29	logFC.30	logFC.31	GeneName
1	0	0	1.98766	0.091372	1.99598	0.729457	1.61844	1.62768	1.94941	1.82687	1.0496	1.69316	1.74234	1.81882	1.81519	2.04474	1.94943	0.15613	2.21849	1.01048	1.52898	2.02533	0.441489	1.61625	1.93914	1.85193	0.269516	1.81001	2.22552	0.94016	1.98766	1.77368	2.1544	AGR2
16	0	0	0.301351	0.0357737	0.270571	0.0835685	0.152072	0.146619	0.287485	0.289554	0.0957419	0.140301	0.0903319	0.108563	0.282568	0.28839	0.277296	0.00196291	0.304308	0.224439	0.266227	0.261981	0.147	0.33206	0.296791	0.323226	0.23061	0.313518	0.283364	0.204813	0.301351	0.323317	0.248487	FOXQ1
47	0	0	0.138277	0.0276854	0.147368	0.0397149	0.099261	0.109236	0.0193456	0.107451	0.0883037	0.0968648	0.0332961	0.0735448	0.101868	0.13742	0.0788044	0.00734977	0.162648	0.0920019	0.154919	0.123358	0.0780659	0.0902816	0.126992	0.128084	0.10576	0.089228	0.138376	0.0998175	0.138277	0.123874	0.144196	TRNP1
63	0	0	0.222497	2.00353e-05	0.21227	0.139859	0.115855	0.143596	0.196116	0.152666	0.0894852	0.110824	0.188423	0.118942	0.14804	0.172072	0.259095	0.0388589	0.197539	0.0802091	0.122771	0.173309	0.0572429	0.209005	0.212615	0.183876	0.00560411	0.185168	0.158366	0.0718068	0.222497	0.157859	0.243291	KDELR2
71	0	0	0.121321	0.0161634	0.125006	0.00493055	0.0487691	0.0522686	0.0756231	0.0563118	0.0567003	0.0380106	0.0484664	0.0496698	0.066028	0.119094	0.0836816	0.00176122	0.0691168	0.0236988	0.0790548	0.121321	0.0464775	0.0741785	0.119355	0.116993	0.0381079	0.0599186	0.051789	0.056174	0.118245	0.113923	0.115294	CTTN
83	2.33393e-224	9.25239e-223	0.0687247	0.0123643	0.0650248	0.0308354	0.0433346	0.0520318	0.0708399	0.0589973	0.0491664	0.0317676	0.000793609	0.0171168	0.0544695	0.0661317	0.0885225	0.00541992	0.0670809	0.0297391	0.0765594	0.0533246	0.048568	0.0600659	0.0641524	0.0616265	0.0626782	0.0630612	0.0581352	0.0464933	0.0687247	0.0615756	0.0747066	ME1
84	1.01912e-134	1.96998e-133	0.0517146	0.00380397	0.0207191	0.0104869	0.0108882	0.00663529	0.0114093	0.0135914	0.00219662	0.0214895	0.0280363	0.0229427	0.0227928	0.0490097	0.0258625	0.00642206	0.0451764	0.0247878	0.0408907	0.0242948	0.0214849	0.0246395	0.0293503	0.0503115	0.0165235	6.16829e-05	0.0521406	0.0205588	0.0333175	0.0463955	0.0517146	TNPO1
90	2.55439e-184	7.78811e-183	0.0897543	0.0119955	0.115628	0.0205068	0.0558246	0.0658385	0.113238	0.055905	0.0702171	0.0573878	0.0480721	0.0560427	0.0637111	0.10381	0.107327	0.0051941	0.0689169	0.030839	0.107758	0.0731132	0.0331492	0.0557079	0.0786342	0.0855629	0.0824608	0.048949	0.0648857	0.0394823	0.0897543	0.0845685	0.0913725	GCNT1
91	0	0	0.139041	0.0255133	0.134582	0.0367552	0.100702	0.103587	0.101041	0.0965039	0.0727508	0.09914	0.0923063	0.0938317	0.125803	0.133742	0.132718	0.0059972	0.0832932	0.0312355	0.0755527	0.118813	0.0683539	0.130711	0.128886	0.146589	0.0467463	0.108998	0.0971421	0.0674232	0.139041	0.145069	0.122661	ATP8B1
96	0	0	0.134322	0.0337421	0.120717	0.0246254	0.0938751	0.0908596	0.149743	0.0814316	0.0693965	0.091724	0.0585164	0.0785295	0.127378	0.138365	0.0696035	0.00335222	0.114385	0.0665459	0.150453	0.0307383	0.0965143	0.135828	0.112532	0.138055	0.0467305	0.125183	0.0848537	0.0802405	0.134322	0.137297	0.136922	LGALS9
100	0	0	0.167391	0.0292086	0.157423	0.0772792	0.0642494	0.0669176	0.110925	0.124224	0.0209762	0.0755504	0.124457	0.0845992	0.119801	0.116405	0.13523	0.0370779	0.174605	0.078367	0.0788516	0.145022	0.0689462	0.154274	0.170246	0.0682409	0.0025914	0.147069	0.202357	0.123542	0.167391	0.0629237	0.19865	PDIA4
103	8.08347e-277	4.27608e-275	0.0938417	0.0020009	0.0952474	0.0353397	0.0658616	0.064132	0.0621935	0.0671416	0.0487071	0.0606809	0.0468338	0.0531	0.074033	0.0919309	0.0131355	0.0129162	0.0861474	0.0514626	0.0637755	0.0708589	0.0133796	0.0772394	0.0813642	0.0929546	0.0594262	0.0570976	0.0462831	0.0439391	0.0938417	0.0925374	0.0839598	GATA6
110	2.55417e-272	1.32398e-270	0.106222	0.0106332	0.0945149	0.0438407	0.075495	0.0817622	0.0945107	0.0669959	0.0248264	0.0790553	0.0712824	0.0691477	0.039676	0.0979098	0.0984111	0.016903	0.0972454	0.053041	0.0197259	0.0654165	0.0238806	0.0669873	0.0778383	0.0974411	0.0778438	0.0630558	0.0649144	0.0643208	0.106222	0.0911413	0.0872931	METTL7A
112	1.53605e-204	5.44566e-203	0.0986368	0.00522524	0.0817686	0.0213963	0.0157837	0.0240984	0.0638828	0.0665772	0.0412676	0.00755152	0.0423788	0.00223663	0.0770472	0.0946995	0.0891934	0.017494	0.0742087	0.0611462	0.0645716	0.0614379	0.0246381	0.0683699	0.0748389	0.0955493	0.0791601	0.0697236	0.0537014	0.0629664	0.0797053	0.0986368	0.0785385	FAR1
125	4.74913e-211	1.76386e-209	0.0547827	0.0136432	0.0420284	0.0225064	0.0321418	0.0308142	0.045515	0.0501576	0.0177362	0.0341717	0.0195255	0.0287511	0.0425532	0.0482359	0.0490842	0.00580654	0.062156	0.0377913	0.0489251	0.0447414	0.0502618	0.0664111	0.0513833	0.0546432	0.0441477	0.0544054	0.0493329	0.0445739	0.0547827	0.0529635	0.0473999	ANO1
133	0	0	0.280755	0.000139613	0.125583	0.099716	0.0757171	0.104227	0.131335	0.129344	0.0653402	0.119087	0.138377	0.102809	0.184059	0.209199	0.134761	0.0418437	0.113881	0.0643908	0.177888	0.0882087	0.12635	0.191322	0.0877106	0.280755	0.108373	0.117547	0.117406	0.0575083	0.159122	0.280128	0.193227	ARL6IP1
136	1.10365e-268	5.63382e-267	0.0762237	0.000530591	0.0798478	0.0304988	0.0354237	0.0510703	0.0553618	0.0693595	0.0206475	0.0260968	0.0438528	0.0324754	0.0666584	0.0782476	0.014308	0.00534253	0.0426971	0.0111304	0.0541723	0.0762237	0.027579	0.0347764	0.0735724	0.0756596	0.0393924	0.028245	0.056532	0.0109916	0.0797669	0.0749258	0.0791187	AP1M2
138	0	0	0.150207	0.013837	0.144902	0.0701503	0.106717	0.098746	0.138689	0.108706	0.0592849	0.117636	0.119691	0.108995	0.120985	0.163207	0.131487	0.0276338	0.188361	0.0828513	0.145892	0.108089	0.0777995	0.115642	0.141311	0.162675	0.0939394	0.110282	0.169904	0.0850383	0.150207	0.162424	0.174864	FAM120A
139	0	0	0.121351	0.0269949	0.0936907	0.0808787	0.0367762	0.0467193	0.0831733	0.124351	0.0250097	0.0326596	0.0637984	0.0470033	0.0993595	0.10518	0.100992	0.0199393	0.0815495	0.0557333	0.0756408	0.109872	0.0840903	0.102606	0.111872	0.13194	0.0565938	0.0755636	0.0883044	0.0679699	0.121351	0.132501	0.107072	UGDH
154	8.15964e-58	5.14394e-57	0.0107461	0.00382444	0.0154425	0.00524836	0.0153701	0.0128963	0.0198378	0.0108346	0.00920639	0.0110953	0.00319887	0.0030104	0.0111391	0.013628	0.0132959	0.000439029	0.0147191	0.011394	0.0149658	0.0107461	0.0136535	0.0114402	0.00939688	0.0119562	0.0137022	0.0147098	0.0165895	0.011231	0.0133848	0.0127447	0.0128813	ANKRD31
156	6.56874e-263	3.22551e-261	0.194582	0.0101844	0.178072	0.128199	0.0228412	0.0593468	0.123868	0.0650697	0.160458	0.113571	0.274661	0.220241	0.0763891	0.206335	0.096083	0.0131037	0.0859092	0.03386	0.147547	0.111515	0.0859719	0.144955	0.139	0.194582	0.0210111	0.0737798	0.0513468	0.0320863	0.150275	0.191416	0.20241	SEM1
162	7.04734e-179	2.04635e-177	0.0726292	0.00408174	0.0601579	0.0233053	0.0337212	0.039496	0.0260792	0.0549728	0.0354896	0.0339481	0.0120637	0.0248313	0.0552484	0.0597721	0.0768807	0.000601504	0.0405367	0.0457602	0.0726292	0.0469797	0.0394468	0.0456174	0.0613081	0.0581028	0.0358102	0.057611	0.0546042	0.0478993	0.0549664	0.054882	0.0703382	B3GNT7
168	5.11736e-158	1.24007e-156	0.0697608	0.00836526	0.0593538	0.00960703	0.032944	0.00993438	0.0697608	0.0263332	0.0508095	0.0476224	0.039677	0.0493196	0.0321287	0.0488627	0.065056	0.00472832	0.0695883	0.0169801	0.0700974	0.0446268	0.03379	0.0334934	0.0484443	0.0481153	0.0405903	0.0536105	0.0548357	0.0283618	0.0478736	0.0444478	0.0662507	SLC16A1
173	2.20911e-234	9.46223e-233	0.0722959	0.00369757	0.0824658	0.0254805	0.0517532	0.0506099	0.0491233	0.0616688	0.0503362	0.0549949	0.0347014	0.0541695	0.0574112	0.0759902	0.0555428	0.00329078	0.0493069	0.0220246	0.0565213	0.0722959	0.0377181	0.04906	0.0660572	0.0635859	0.0378291	0.0452083	0.0457119	0.0247549	0.0682853	0.0620926	0.0817874	CENPV
184	1.04029e-202	3.64188e-201	0.0919963	0.0215021	0.0961587	0.0179148	0.0693742	0.0583161	0.0876815	0.0641396	0.0455201	0.0643403	0.0538396	0.0618716	0.0615303	0.0933641	0.101415	0.00226656	0.132536	0.0648385	0.0989678	0.0819492	0.0454772	0.0562712	0.0884202	0.0819653	0.0258949	0.0671177	0.106498	0.0759547	0.0919963	0.0773994	0.110979	EDEM3
194	4.08285e-183	1.22808e-181	0.071068	0.020136	0.0299932	0.0226906	0.0118558	0.0017784	0.0198273	0.0572776	0.0379054	0.0334161	0.025405	0.0328188	0.0475023	0.0509706	0.0419084	0.0190755	0.0347369	0.0385971	0.0364627	0.0451228	0.0480254	0.0761258	0.0635787	0.071068	0.0456746	0.0196756	0.0540031	0.0467151	0.0493146	0.0711583	0.042248	GCLC
194	3.43847e-208	1.25484e-206	0.0677797	0.00523874	0.059611	0.0275961	0.0472168	0.0435686	0.0592818	0.0381098	0.0489825	0.0408003	0.0180713	0.0263718	0.0609755	0.0677797	0.067962	0.00180866	0.0584772	0.0363632	0.054802	0.0531987	0.033964	0.0613924	0.0629202	0.0741437	0.0450684	0.0583798	0.0352786	0.0385596	0.0575115	0.0758338	0.0647964	ZDHHC20
211	2.87861e-180	8.46867e-179	0.102164	0.00795741	0.0644697	0.0468696	0.0133904	0.0136191	0.0766478	0.0551056	0.0268742	0.0388238	0.0632308	0.0400652	0.0627252	0.110686	0.0590646	0.00645099	0.00757031	0.0286874	0.098437	0.0369053	0.0507049	0.0674754	0.0767069	0.102164	0.0515732	0.0604378	0.0193499	0.0377717	0.0849588	0.0972172	0.110634	VPS35
216	8.68734e-81	8.24437e-80	0.030946	0.00224122	0.0249971	0.0110981	0.043466	0.0332765	0.0235225	0.00851879	0.0369959	0.0434429	0.00664761	0.0431358	0.0137749	0.026958	0.0364035	0.0104094	0.0225632	0.00449813	0.0304174	0.0220164	0.0161385	0.0075122	0.0278976	0.0310107	0.00536397	0.00949724	0.0245367	0.0055029	0.0225525	0.0322428	0.030946	TP53I11
219	3.72908e-225	1.48358e-223	0.110617	0.00914454	0.0729182	0.0411031	0.0855553	0.0674747	0.105348	0.04114	0.0431293	0.0839849	0.0870383	0.0613704	0.0197914	0.102923	0.0880465	0.0171611	0.124357	0.0430733	0.108006	0.0741472	0.0423984	0.0955521	0.0918744	0.110617	0.0685072	0.0611165	0.0781526	0.0231991	0.0914163	0.106505	0.109231	ADD3
219	9.65557e-209	3.53139e-207	0.101564	0.0130965	0.0526873	0.0323033	0.0432655	0.0458573	0.0415994	0.0761235	0.0389826	0.0503498	0.0465613	0.0506108	0.088034	0.0826807	0.0276869	0.0116316	0.00950444	0.00134453	0.0649686	0.048797	0.0551274	0.109036	0.0765742	0.101643	0.0608201	0.0650723	0.0300876	0.047489	0.0761187	0.101564	0.0745256	TXNRD1
221	2.77757e-189	8.80475e-188	0.0642662	0.0108674	0.0663317	0.0149675	0.0296895	0.0351945	0.0509692	0.051168	0.0297186	0.0314206	0.000705715	0.0240951	0.0520366	0.0668179	0.0563441	0.00931254	0.0470727	0.0279889	0.066563	0.0588045	0.0412206	0.0481541	0.0545008	0.065216	0.043128	0.0546601	0.0409625	0.035895	0.0642662	0.0647101	0.0636171	MCU
231	4.97578e-208	1.81192e-206	0.0625885	0.00677244	0.0556585	0.00135371	0.0431964	0.0432156	0.0463791	0.0509853	0.014191	0.0421967	0.0379268	0.0398841	0.0455571	0.0607067	0.0656781	0.00570658	0.0434371	0.0305379	0.0433969	0.0504392	0.0184989	0.0618394	0.0516077	0.0680893	0.0334035	0.0406761	0.0114176	0.034066	0.0625885	0.0662858	0.0523127	SH3RF1
238	1.38458e-104	1.83978e-103	0.0176637	0.00331734	0.0202408	0.00738935	0.0190293	0.0210456	0.0261404	0.0196412	0.0202076	0.0142514	0.0155137	0.0192692	0.0184611	0.0184081	0.0209403	0.00329852	0.0217184	0.0136449	0.023404	0.0176637	0.013777	0.0222797	0.0186999	0.0218244	0.0172036	0.0207025	0.0149521	0.0112894	0.0217709	0.0224187	0.0180972	NRG4
243	8.54718e-230	3.53895e-228	0.147538	0.0107301	0.125906	0.0791988	0.0484803	0.100704	0.119752	0.0882091	0.106442	0.0965787	0.169887	0.136828	0.114058	0.135691	0.0510281	0.0194145	0.0925595	0.0191042	0.101327	0.111339	0.0721638	0.132111	0.105979	0.147538	0.0412447	0.0853436	0.0551258	0.0499605	0.13447	0.141054	0.177665	MRPL52
254	2.32641e-184	7.09946e-183	0.0446821	0.00125236	0.0575731	0.0132988	0.0437047	0.0438648	0.0621475	0.0356967	0.0314402	0.0429925	0.0417461	0.0410605	0.034608	0.0483601	0.0439264	0.0120414	0.03586	0.0228139	0.0343963	0.0446821	0.00716329	0.0286369	0.044354	0.0404849	0.0399338	0.0393225	0.0377758	0.029716	0.049505	0.0373078	0.05765	SLC9A2
269	7.84792e-146	1.67326e-144	0.0526122	0.00287068	0.0511139	0.00961474	0.0519821	0.0493402	0.0555593	0.0367191	0.0265964	0.0424847	0.025767	0.0277269	0.0346539	0.0569683	0.068842	0.00512484	0.0266521	0.0123777	0.0510844	0.0331289	0.0146542	0.0373636	0.0526122	0.0555665	0.0071329	0.02191	0.00974458	0.0313198	0.041826	0.052434	0.0508344	CAMK2D
272	9.75891e-205	3.4671e-203	0.117208	0.0233353	0.0463984	0.0268044	0.0495721	0.0466325	0.0548783	0.0886252	0.0302085	0.0429026	0.0522511	0.0495108	0.103325	0.0898738	0.0771129	0.0062231	0.0223237	0.0349245	0.0713415	0.0661377	0.0561347	0.136474	0.10406	0.117208	0.02136	0.0692027	0.0399604	0.0573105	0.0733003	0.112013	0.0765683	TES
285	1.08778e-244	4.91011e-243	0.0941425	0.0123595	0.0819971	0.0413345	0.0755104	0.0632024	0.0625589	0.0542908	0.0750511	0.0753273	0.0738377	0.0702993	0.0405528	0.0797971	0.0685607	0.000728166	0.0674817	0.0407784	0.0622906	0.0635398	0.0333905	0.0716156	0.0641536	0.0941425	0.0303416	0.0275938	0.0534009	0.0470099	0.0819158	0.0890914	0.0704174	SSBP3
314	4.14263e-175	1.1578e-173	0.0929484	0.011748	0.0929484	0.0406635	0.0498241	0.0473926	0.0374528	0.059563	0.0311271	0.0626692	0.13066	0.0804101	0.075235	0.0676821	0.0846192	0.0236523	0.072153	0.0462451	0.0451069	0.076525	0.0462275	0.0841589	0.0900073	0.0660203	0.0142332	0.0630008	0.0641626	0.0576551	0.0859502	0.0569818	0.110355	RPN1
320	1.90523e-160	4.7157e-159	0.0503885	0.00678924	0.0593827	0.0161156	0.0417726	0.0289595	0.0261246	0.0362053	0.0270367	0.0343817	0.057142	0.0267755	0.0355508	0.0541544	0.00553176	0.00165573	0.0296248	0.0119927	0.0416143	0.0503885	0.0252887	0.0226291	0.0460609	0.0483757	0.0259365	0.0109451	0.0148903	0.0224813	0.0493513	0.0452378	0.0602388	ABCD3
332	1.00245e-156	2.39972e-155	0.0267947	0.00397595	0.0305788	0.0094267	0.014383	0.0146365	0.0192549	0.0270253	0.00956862	0.0131701	0.0109797	0.0119232	0.0268063	0.0303604	0.0226239	0.00101781	0.021002	0.010191	0.0258242	0.0267947	0.0120653	0.0203543	0.0291367	0.030882	0.014589	0.0165792	0.0225935	0.0134217	0.0316382	0.0310561	0.031433	OVOL2
341	1.11377e-163	2.83627e-162	0.0823126	0.0142875	0.0650064	0.00752907	0.00773939	0.00827537	0.0322412	0.0369787	0.00653058	0.0123861	0.0226071	0.000323238	0.0616251	0.0761503	0.0812543	0.0159625	0.0644157	0.0333151	0.0577656	0.0642305	0.0423816	0.0611604	0.0754361	0.0823126	0.032608	0.0368312	0.0838981	0.0512751	0.0696149	0.0798332	0.0878407	EIF4G1
368	1.09837e-163	2.79917e-162	0.0696055	0.00754105	0.0768907	0.00416869	0.0503051	0.0449795	0.0561964	0.0153901	0.0293347	0.0526628	0.0472906	0.048811	0.041553	0.0737876	0.048863	0.0130873	0.0297351	0.0139811	0.0266285	0.0551096	0.0113099	0.0522392	0.0489188	0.077383	0.0261017	0.0131511	0.0323837	0.0371082	0.0696055	0.0756929	0.0704126	SSFA2
383	5.14576e-126	8.95117e-125	0.0338449	0.0120646	0.0348478	0.0158939	0.0282184	0.0230987	0.0372766	0.0302935	0.00265934	0.0253932	0.0324795	0.0260166	0.0315689	0.0297344	0.0495272	0.000891654	0.0127892	0.0112401	0.0288117	0.0338449	0.0205694	0.0344546	0.0346234	0.0335156	0.0098336	0.0297441	0.00702979	0.0150027	0.0339689	0.0336969	0.0385538	ALDH18A1
389	1.58284e-221	6.1871e-220	0.150678	0.00666859	0.0579195	0.0643121	0.0949429	0.0724138	0.0469478	0.0986264	0.00851732	0.108726	0.122651	0.118784	0.0979879	0.130682	0.000883269	0.0105545	0.0546867	0.0358064	0.0704219	0.0292043	0.0517595	0.104581	0.0936034	0.150678	0.0429847	0.0517517	0.0592478	0.0511556	0.0498849	0.141935	0.120059	PTP4A2
411	6.38363e-111	9.31249e-110	0.0373138	0.00950677	0.0367244	0.0132498	0.00976423	0.0183195	0.0276601	0.023624	0.0335636	0.0118276	0.030371	0.018699	0.0276531	0.0373138	0.0297578	0.0011393	0.0302059	0.0169656	0.0374137	0.0323876	0.0295104	0.0304518	0.0331536	0.0356463	0.0300728	0.0275851	0.0288264	0.0249109	0.0319292	0.0363505	0.036061	GPD1L
438	4.77968e-153	1.0957e-151	0.079498	0.0133699	0.0362228	0.0268451	0.0338827	0.0396947	0.01971	0.0303506	0.0086501	0.0314776	0.0343978	0.0284573	0.0459708	0.0573435	0.0454356	0.00216459	0.058805	0.0364356	0.0510015	0.0419478	0.0284685	0.0325553	0.0400895	0.0526338	0.0137373	0.0154802	0.0339811	0.0380918	0.0515587	0.0512269	0.079498	ACBD3
443	7.15713e-95	8.36071e-94	0.0407968	0.00398669	0.0249847	9.73329e-05	0.0353848	0.0355425	0.0353714	0.0186331	0.0238015	0.0353732	0.0297546	0.0341595	0.0261435	0.0358035	0.0224434	0.00375233	0.033943	0.0219208	0.027856	0.0312544	0.0119292	0.0255125	0.0317959	0.0316577	0.0174457	0.0240059	0.0222042	0.0238355	0.0146831	0.0311238	0.0407968	GALNT10
443	2.11736e-175	5.92754e-174	0.0900219	0.0130185	0.0892602	0.00449393	0.032927	0.0400626	0.0226198	0.0505094	0.00394333	0.0273265	0.0410959	0.0137615	0.0580609	0.098073	0.0516698	0.0084591	0.017431	0.0159107	0.0792818	0.0512551	0.0405988	0.0626964	0.0881979	0.0947764	0.0387975	0.0581135	0.0188634	0.034183	0.0900219	0.0962273	0.0869116	PFKL
464	1.37512e-105	1.85663e-104	0.0458191	0.00113992	0.0449541	0.0222813	0.0150043	0.0125486	0.0399132	0.0199411	0.0117284	0.0146422	0.0154153	0.0134694	0.0213236	0.0458191	0.00789784	0.00703264	0.0319864	0.0148202	0.0381109	0.0289585	0.0159386	0.0340591	0.0377658	0.0436499	0.0329355	0.0326248	0.0240906	0.020198	0.0421723	0.0421986	0.044508	ACO1
479	7.798e-135	1.51086e-133	0.110067	0.00295285	0.0836973	0.0592592	0.0182648	0.0481675	0.039441	0.0365891	0.0372329	0.0140753	0.070196	0.0365812	0.0380146	0.0856796	0.0452826	0.010754	0.0682451	0.0302225	0.0490723	0.0616861	0.0255096	0.0337212	0.0748864	0.0745056	0.0240128	0.0290613	0.0708563	0.0327208	0.0686072	0.0742602	0.110067	COPZ1
502	3.11068e-133	5.88748e-132	0.0768946	0.00447882	0.045846	0.0211506	0.0655507	0.0407357	0.0218102	0.0102681	0.0229296	0.0679335	0.0675742	0.0637594	0.0315903	0.0827646	0.041856	0.0241874	0.0394599	0.0151577	0.054727	0.0459806	0.0335595	0.0209993	0.034141	0.0768946	0.0331901	0.00815795	0.00121105	0.0173402	0.0282729	0.076458	0.0621873	AP2B1
502	1.2423e-120	2.02845e-119	0.0358825	0.00495804	0.0426611	0.0108138	0.02769	0.0282223	0.00797265	0.033844	0.0201815	0.0383558	0.0444303	0.0450992	0.0270527	0.0350771	0.039908	0.00194683	0.0343435	0.0189268	0.0267471	0.0358825	0.00305738	0.0414687	0.0383907	0.0439041	0.0193424	0.0202315	0.026201	0.0110638	0.0416889	0.0460702	0.0347902	RAB40B
575	1.49809e-56	9.22228e-56	0.0161128	0.00625219	0.0138892	0.00535076	0.00951175	0.0107209	0.0220158	0.0154778	0.00313719	0.00750257	0.00509874	0.00344674	0.015639	0.016984	0.0308819	0.0067126	0.014759	0.0132323	0.029955	0.0161128	0.0102539	0.016224	0.0119493	0.0181043	0.0130307	0.0157074	0.00748093	0.0152201	0.0155725	0.0169207	0.015369	CARNS1
583	5.12681e-102	6.58281e-101	0.0353944	0.00539289	0.0316344	0.0131569	0.0214728	0.0175164	0.0305093	0.0226811	0.0346992	0.0287381	0.0391676	0.0281365	0.0262471	0.0353944	0.0267515	0.00549921	0.0281718	0.0105926	0.0145664	0.018416	0.0139758	0.031622	0.031863	0.0394768	0.00211292	0.0173443	0.021571	0.00490145	0.0304516	0.0380024	0.0319605	SMARCD2
589	7.29545e-97	8.73839e-96	0.0802764	0.00585236	0.0505253	0.00989226	0.0203199	0.0381608	0.0416207	0.0083937	0.0348675	0.0220318	0.0308826	0.0328771	0.00788077	0.0612918	0.0361664	0.0135804	0.0520501	0.015219	0.0586846	0.0353914	0.0322812	0.0261327	0.0411166	0.0582697	0.0380424	0.0150701	0.0303836	0.0214902	0.0385424	0.0557446	0.0802764	CCDC124
591	7.3098e-90	7.98294e-89	0.0327028	0.0078342	0.0229937	0.0137758	0.00403675	0.0168496	0.0277393	0.0146135	0.00178957	0.00891726	0.00565934	0.00885826	0.0266057	0.0242538	0.031685	0.00154232	0.000622482	0.00215252	0.0346555	0.0196146	0.0232831	0.0254689	0.0223506	0.0287419	0.0106194	0.0233389	0.0110957	0.0135869	0.0132486	0.0269355	0.0327028	CASP3
634	2.51301e-112	3.74417e-111	0.0293351	0.00138843	0.0217015	0.00494825	0.00829915	0.0122162	0.00770523	0.0078238	0.0147541	0.01206	0.0233482	0.00913312	0.00850526	0.0186051	0.023027	0.00199067	0.0159848	0.00965727	0.0218356	0.0159921	0.00815657	0.0101665	0.0173483	0.0182354	0.0122572	0.00790217	0.0155979	0.0112273	0.0175936	0.0180393	0.0293351	VKORC1L1
639	7.78916e-133	1.4676e-131	0.0393886	0.000853985	0.0360088	0.00106906	0.0219563	0.0193543	0.0281792	0.011564	0.00741807	0.0216429	0.0214831	0.0208877	0.00462948	0.0279988	0.0373273	0.00627034	0.0305754	0.0156664	0.0270944	0.017296	0.0126531	0.00930263	0.0258097	0.0301619	0.0144412	0.00935614	0.0186543	0.0144283	0.0393886	0.0255161	0.0389502	EVI5
644	3.73006e-96	4.42357e-95	0.076221	0.0171233	0.0330412	0.0472181	0.0348798	0.0465322	0.0397478	0.0404997	0.0469294	0.0313877	0.0536916	0.0484471	0.0622996	0.0434877	0.0874372	0.00979946	0.0665325	0.0300238	0.0484268	0.039359	0.0455076	0.0790682	0.0592148	0.0303841	0.0201	0.0612952	0.0582969	0.0538591	0.0486005	0.0207483	0.076221	UFM1
658	4.61816e-93	5.25564e-92	0.0241298	0.00266904	0.00911062	0.00175777	0.00643156	0.00491105	0.00502104	0.0127398	0.00926788	0.00875559	0.00606794	0.00712766	0.0129022	0.0186731	0.0153213	0.00301424	0.0256092	0.0139164	0.0177398	0.0178516	0.0131883	0.0167596	0.0150975	0.0200765	0.0168512	0.00841672	0.0210312	0.0114388	0.0115243	0.0192838	0.0241298	ATP9B
676	5.42861e-103	7.05832e-102	0.026782	0.00251332	0.0237296	0.00193992	0.0111301	0.0105897	0.0231941	0.0109175	0.00813176	0.0124862	0.00652033	0.00916464	0.0213117	0.0279344	0.0185511	0.00456833	0.00519568	0.0084184	0.0232891	0.020044	0.00769405	0.0273755	0.0261228	0.028291	0.0134023	0.0205111	0.00886878	0.0162762	0.026782	0.027555	0.0200173	RAPH1
680	1.87472e-136	3.68549e-135	0.0455942	0.00732601	0.0286179	0.00281734	0.0104391	0.00781807	0.00467384	0.00756258	0.00138613	0.0200894	0.0178167	0.0180585	0.0187177	0.03157	0.0253807	0.00166891	0.00989908	0.00907977	0.0220425	0.0289993	0.0201576	0.0401618	0.0303555	0.0455942	0.00922651	0.0132818	0.0180199	0.0108198	0.0383341	0.0460165	0.0316545	CDC42EP4
706	6.40109e-99	7.89264e-98	0.0429572	0.0104421	0.0300392	0.0135218	0.0260029	0.0197206	0.0252704	0.0267951	0.000307586	0.030766	0.0476345	0.0229554	0.0315738	0.0429572	0.0463875	0.00269338	0.0290377	0.0175747	0.0399898	0.0271773	0.0256566	0.0429057	0.033683	0.0493169	0.0176561	0.0248204	0.0219874	0.0239934	0.0369438	0.0517952	0.0402062	HNRNPUL2
711	2.92022e-109	4.17292e-108	0.0443299	0.00735819	0.0381384	0.00359155	0.01332	0.0138444	0.0307988	0.0285456	0.01298	0.0183201	0.00397034	0.0101481	0.0321589	0.0443299	0.0339689	0.0017414	0.00811626	0.0129304	0.0339649	0.0289644	0.0175943	0.0153035	0.0273169	0.0332658	0.0104681	0.0203275	0.0207821	0.0208676	0.0288403	0.0346777	0.0489797	GSR
754	8.09887e-76	7.10488e-75	0.0209573	0.00395975	0.0149187	0.000504073	0.00957638	0.0154009	0.0160867	0.00584251	0.00882123	0.00912467	0.0104846	0.0062829	0.00874516	0.0207657	0.0238144	0.0039659	0.0123349	0.00808591	0.0230035	0.0142744	0.00946593	0.00952693	0.0117142	0.0169091	0.0107951	0.0122767	0.0102632	0.0121966	0.0113865	0.0164994	0.0209573	ATP7A
787	3.28978e-118	5.234e-117	0.0779663	0.00305722	0.0447519	0.0250668	0.011698	0.0236713	0.022079	0.0190235	0.0359162	0.0185803	0.0166865	0.0177686	0.023968	0.0726976	0.0204368	0.00599245	0.017315	0.0116983	0.0435313	0.034438	0.0213724	0.0183926	0.0459591	0.0597117	0.026185	0.00737732	0.0156671	0.0242032	0.0310047	0.0547585	0.0779663	UBE2K
788	3.33552e-118	5.30425e-117	0.0831518	0.00766601	0.0131737	0.00876679	0.0231843	0.00362274	0.0326229	0.023807	6.067e-05	0.0343494	0.0638688	0.0358718	0.0258734	0.0750022	0.0556567	0.0152689	0.0635777	0.0311086	0.0683096	0.0425548	0.0255237	0.047262	0.0365772	0.0792015	0.0259827	0.0250654	0.0401975	0.0296442	0.0039691	0.0778302	0.0831518	SLTM
791	5.17744e-81	4.94e-80	0.0356917	0.00529325	0.031601	0.00735296	0.0240392	0.0246703	0.0211349	0.0212453	0.0171298	0.0261547	0.0255537	0.0265087	0.0276195	0.0356173	0.00432709	0.00203716	0.00959969	0.0104611	0.0372787	0.0294444	0.0212623	0.0231809	0.0269625	0.0356917	0.0201539	0.0187256	0.00683596	0.0162638	0.0310569	0.0348958	0.0365477	PET117
898	1.6553e-27	5.70032e-27	0.00411039	0.000118941	0.00274744	0.00200611	0.00278015	0.00261752	0.000576671	0.00440193	0.00295568	0.00283333	0.00353942	0.00245489	0.00117499	0.00427968	0.00274368	4.31346e-06	0.00303201	0.00226998	0.00198036	0.00411039	0.00167801	0.000340764	0.00419828	0.00407246	0.00376614	0.00122617	0.00204519	0.0021636	0.000614098	0.00397082	0.00412974	LOXL1-AS1
907	4.29112e-63	2.99014e-62	0.0276499	0.00817779	0.0193241	0.00752516	0.0226553	0.0244238	0.0161846	0.0102327	0.031394	0.0198419	0.0305446	0.0243546	0.0193028	0.0252251	0.0207324	0.00202397	0.0193521	0.00856194	0.0190329	0.00693897	0.0171578	0.0189746	0.021271	0.0276499	0.00608058	0.0165524	0.0158803	0.0205337	0.0166075	0.0260992	0.0277506	TAF13
925	9.61533e-75	8.27506e-74	0.0187011	0.00165323	0.0215322	0.000273304	0.019674	0.0154738	0.0146968	0.0140815	0.00785411	0.0212848	0.0235016	0.0185033	0.00596585	0.017917	0.00513314	0.000665785	0.0148798	0.00470518	0.0112862	0.0187011	0.00444731	0.00204408	0.0164311	0.0146874	0.00253688	0.00337455	0.0128361	0.00735902	0.0128918	0.0147974	0.0236041	DLG3
927	1.12287e-44	5.46096e-44	0.0142562	0.00602129	0.00974894	0.00643189	0.00166379	0.00409713	0.00717833	0.00721733	0.00959245	0.0029793	0.00747792	0.0109114	0.0112577	0.0222417	0.0283203	0.00161868	0.0171144	0.0119986	0.0199035	0.0142562	0.0141292	0.0112086	0.0188064	0.0199523	0.00825012	0.00695146	0.0142122	0.0120376	0.000227123	0.0160908	0.000108157	FAM104A
928	2.32253e-80	2.18862e-79	0.0370014	0.000863329	0.0271043	0.00866489	0.0215748	0.0244855	0.0160861	0.015972	0.0191568	0.0253601	0.0244016	0.0250955	0.0150348	0.0313297	0.0316688	0.0053138	0.0391517	0.0194147	0.0311024	0.0205887	0.00693527	0.018879	0.0270096	0.0290191	0.0161876	0.0145797	0.0272596	0.016069	0.0252911	0.0287138	0.0370014	SEC23IP
957	5.49608e-82	5.32738e-81	0.0387703	0.000458343	0.0184221	0.00640208	0.012699	0.00743976	0.0221692	0.025549	0.0144538	0.0174905	0.0279644	0.0161153	0.0259347	0.0256321	0.0161017	0.00721856	0.0273994	0.00572978	0.00261893	0.0221735	0.00649129	0.0254175	0.0300122	0.0310944	0.000474393	0.0106912	0.0255893	0.000217719	0.0183903	0.0280782	0.0387703	DUS1L
968	1.56469e-59	1.01857e-58	0.0228457	0.00480273	0.00721004	0.00770128	0.00353971	0.00223687	0.00185987	0.0149074	5.97652e-05	0.00582538	0.00374959	0.00523468	0.00812165	0.0163012	0.00313629	0.00267432	0.00656401	0.00541825	0.007688	0.0116544	0.0115879	0.0225594	0.0178799	0.0225661	0.00811975	0.00768952	0.00854997	0.00887132	0.0159632	0.0228457	0.0138255	UBTD2
1026	1.03999e-90	1.14999e-89	0.0420994	0.000129766	0.0219859	0.0131452	0.00778598	0.00274265	0.00635988	0.00101554	0.00262128	0.00122134	0.0228594	0.00520541	0.0054536	0.0255979	0.0235407	0.00353407	0.0234758	0.0117413	0.00234215	0.0187517	0.00717951	0.0122684	0.0162708	0.022687	0.013757	0.0093493	0.0285413	0.020562	0.0135695	0.0175486	0.0420994	MAGT1
1027	1.49697e-102	1.93395e-101	0.0447212	0.00185842	0.0250834	0.0100048	0.00943014	0.0109945	0.0150395	0.00239262	0.00713388	0.0179389	0.018596	0.0168651	0.00409495	0.0442491	0.0158012	0.0055843	0.00360503	0.00720977	0.0277817	0.0150689	0.0153939	0.0195102	0.0222857	0.0447212	0.00345698	0.00537086	0.00981641	0.00840427	0.0225323	0.0469983	0.0326277	FGD5-AS1
1055	1.34387e-65	9.80009e-65	0.0122683	0.00342174	0.0140971	0.00340359	0.0138301	0.0118181	0.0126929	0.00932616	0.013988	0.0135643	0.0138151	0.0135724	0.0122377	0.0154287	0.0132216	0.000434786	0.00898111	0.00708036	0.0153344	0.0122683	0.00991536	0.0126653	0.013574	0.0157421	0.00793051	0.00976568	0.008672	0.00780475	0.0147226	0.0161495	0.0147482	KAT14
1092	4.76966e-62	3.26326e-61	0.0193479	0.000229961	0.0142618	0.00742939	0.0163488	0.0241359	0.0204729	0.00868995	0.0127896	0.0208637	0.0300584	0.0260031	0.0145285	0.0177905	0.00143214	0.000991643	0.0191907	0.00874753	0.0210213	0.0114075	0.00920058	0.00911282	0.0157089	0.0161013	0.0113753	0.00727218	0.0159916	0.00906683	0.0156098	0.0135203	0.0193479	GEMIN7
1169	2.17365e-47	1.12292e-46	0.00690992	0.00207587	0.00580884	0.00604084	0.00374446	0.00392815	0.00428371	0.00989119	0.00270041	0.00483137	0.00756949	0.0046766	0.00873681	0.00639554	0.00406795	0.00292954	0.00378123	0.00396332	0.00437829	0.00690992	0.00427155	0.0137601	0.00529992	0.00978231	0.00475153	0.00735624	0.00638253	0.00289951	0.00816275	0.0104684	0.00519756	MSX2
1192	1.28825e-41	5.90398e-41	0.0157217	0.000158649	0.0106269	0.00359935	0.00619237	0.00665358	0.00388139	0.00720441	0.00675472	0.010264	0.0135255	0.0105392	0.00304976	0.0138223	0.0088431	0.00202858	0.00753922	0.00479275	0.00677606	0.0125878	0.00174459	0.0113182	0.0086955	0.014581	0.000894499	0.00298089	0.0149431	0.0035209	0.00880088	0.0157217	0.0119201	SLC37A3
1241	2.41329e-49	1.29748e-48	0.0224186	0.000785067	0.0124592	0.00222962	0.00883289	0.00604937	0.0129873	0.0116722	0.00772096	0.00851115	0.0138799	0.00967113	0.00989217	0.0219344	0.0124357	0.00171872	0.0178431	0.00835424	0.016631	0.0130451	0.0046635	0.012223	0.0151135	0.0197476	0.0127187	0.00396493	0.0253193	0.00583697	0.0164378	0.0224186	0.0204111	BTBD2
1366	1.88488e-71	1.53659e-70	0.0323578	0.0030397	0.0177365	0.0119615	0.0019674	0.00653162	0.00838415	0.0130688	0.0192117	0.00445306	0.0360896	0.0184186	0.019559	0.0323578	0.0270153	0.00531525	0.0149178	0.000855334	0.0202553	0.00832555	0.0134407	0.0138677	0.0193561	0.0321094	0.00640531	0.0098124	0.0354334	0.00727917	0.0168752	0.0314405	0.0332016	TMEM33
1390	7.74185e-63	5.36792e-62	0.034563	0.00255026	0.0177137	0.0122405	0.0138929	0.00412963	0.00730522	0.0133562	0.00252093	0.0129612	0.00786607	0.00174458	0.0203747	0.0366735	0.0227423	0.00859782	0.0307686	0.0101465	0.0307204	0.0115499	0.0132121	0.0217393	0.0249778	0.034563	0.00798386	0.00374001	0.01827	0.00467119	0.0184666	0.0347609	0.0361399	USP7
1424	9.38995e-70	7.40466e-69	0.0201336	0.00250002	0.018077	0.00191669	0.0174703	0.0128472	0.017396	0.0124274	0.017199	0.01977	0.0204393	0.0185914	0.0160653	0.0201336	0.0183035	0.000211436	0.0269522	0.0138283	0.0202056	0.016034	0.0100762	0.0127264	0.0173156	0.0194342	0.012382	0.0119531	0.000796742	0.0137461	0.0159335	0.0196177	0.0236518	GCN1
1432	3.07828e-75	2.6739e-74	0.0315252	0.00213432	0.0165611	0.0134702	0.0125511	0.011421	0.0133863	0.00610845	0.00347823	0.0177679	0.0251755	0.0200495	0.0158085	0.0217128	0.00208827	0.00532691	0.0245945	0.00988852	0.00835665	0.0143118	0.00655146	0.0188648	0.0219211	0.0315252	0.00798403	0.0037308	0.0234583	0.00563167	0.0142165	0.0290676	0.0161213	CUL4A
1485	6.57205e-71	5.30478e-70	0.0163031	0.00314301	0.0107977	0.00174353	0.00299005	0.00524478	0.00765259	0.00252406	0.00667692	0.00124326	0.00629126	0.00400946	0.00610135	0.0151335	0.00307369	0.000991232	0.00899473	0.00793691	0.0104324	0.000959392	0.0036122	0.00101571	0.00779284	0.0100753	0.00655525	0.000662813	0.0146128	0.00780556	0.0101467	0.0108715	0.0163031	STYXL1
1501	8.56277e-65	6.16395e-64	0.0268021	0.00899286	0.0168189	0.00508302	0.00914195	0.00322337	0.0045856	0.0173894	0.00538942	0.018062	0.0240542	0.0126192	0.0168426	0.024923	0.0222802	0.00808411	0.0151392	0.0068445	0.0212713	0.0142846	0.0170315	0.0333941	0.0297596	0.0368732	0.00217617	0.00449925	0.00269176	0.00929774	0.0155891	0.034349	0.0268021	CTBP1
1507	1.0032e-36	4.18369e-36	0.0112357	0.000425707	0.00581832	0.00327855	0.00193977	0.00289237	0.00303116	0.00599567	0.00134872	0.0061357	0.00709379	0.0082591	0.00164668	0.00957273	0.0131886	0.000952248	0.00986797	0.00454953	0.00984606	0.00744148	0.00379104	0.00766058	0.0112357	0.00995656	0.00538005	0.00406441	0.00617064	0.00471642	0.00648355	0.0105665	0.0128239	ALG12
1517	4.92785e-55	2.94547e-54	0.0148693	0.00294739	0.012255	0.00075475	0.0057991	0.00269619	0.00390336	0.000698045	0.000678395	0.00563694	0.00419345	0.00334116	0.00750226	0.0164155	0.0108729	0.00029304	0.0158489	0.00832615	0.00862332	0.0109645	0.00555965	0.00425622	0.0116081	0.0143058	0.00460464	0.00361525	0.00787311	0.0108782	0.0132685	0.0145837	0.0148693	UTP14C
1638	2.42317e-48	1.2736e-47	0.028225	0.00277573	0.00210052	0.00954516	0.0180276	0.0216984	0.00966112	0.0168257	0.0255337	0.0208085	0.0234414	0.0219825	0.019795	0.0278749	0.020339	0.00350401	0.0194978	0.00837136	0.0198859	0.0142264	0.012181	0.0208219	0.0130456	0.028225	0.0099107	0.00999649	0.00776589	0.0120231	0.000332193	0.0243238	0.0290186	CCNK
1659	2.05703e-35	8.32592e-35	0.0103992	0.00087718	0.00663657	0.00223658	0.00419053	0.00470676	0.00398298	0.00370441	0.0056317	0.00606911	0.0112641	0.00755878	0.00472804	0.0103992	0.0049768	0.0038214	0.0123254	0.00436793	0.00875309	0.00623361	0.00425371	0.00509507	0.00923258	0.00887292	0.0068974	0.00555209	0.00582498	0.00357514	0.00654451	0.0075376	0.0120538	HIRA
1687	1.96018e-81	1.8853e-80	0.0268517	0.00109505	0.0135647	0.0098498	0.0105672	0.0140188	0.0143173	0.0128377	0.00447288	0.00865788	0.0199128	0.00215869	0.0143728	0.0241967	0.00892252	0.00450142	0.0160738	0.00639878	0.013874	0.0154053	0.00794804	0.0156688	0.0166037	0.0226221	0.00385167	0.0091551	0.00890371	0.00378623	0.0104069	0.0221638	0.0268517	CNOT11
1737	8.05348e-39	3.48963e-38	0.00487997	0.00198003	0.0059902	0.00166127	0.00379208	0.00378259	0.00267849	0.00524969	0.00511075	0.00477696	0.00599108	0.00474974	0.00520148	0.0058402	0.00310699	7.11165e-05	0.00275975	0.00201707	0.00501851	0.00487997	0.00421607	0.00603942	0.00482931	0.00558015	0.00330252	0.00506066	0.00444198	0.00317691	0.0061719	0.00585516	0.00489775	KCNK10
1777	3.18396e-09	7.5567e-09	0.00136498	0.000236727	0.000664473	0.000577433	0.000222687	0.000182609	0.00138654	0.0012842	0.000292773	0.000314621	6.69827e-05	7.92371e-05	0.00108989	0.00148105	0.00224998	0.00102117	0.00196709	0.00126058	0.00134335	0.00125718	0.00056084	0.00119164	0.00137924	0.0013745	0.00160772	0.00134871	0.00157261	0.000832493	0.00141254	0.0010847	0.00136498	AC005041.1
2015	3.70748e-19	1.07767e-18	0.00731746	5.99775e-05	0.000943621	0.00200939	0.00107317	0.00165393	0.00258719	0.000149502	0.00906458	0.00481574	0.00881191	0.0076271	0.00156228	0.0066195	0.00107924	0.000207881	0.00731593	0.00203925	0.00382203	0.00338931	0.00248068	0.00246506	0.00402972	0.0038732	0.00329698	0.00104704	0.00229769	0.000583848	0.00342598	0.00411222	0.00731746	HYLS1
2059	2.28648e-50	1.25178e-49	0.0173559	0.00328726	0.00546197	0.0075625	0.00817717	0.00897106	0.00456986	0.00883898	0.00935739	0.0120244	0.0137368	0.0145381	0.0100084	0.0170622	0.0100909	0.00277499	0.0115118	0.0094271	0.0101556	0.0104686	0.00758737	0.00997828	0.0134409	0.0173559	0.00552847	0.00602997	0.00917592	0.00688113	0.00761681	0.0156283	0.0126549	RBM27
2702	5.89753e-33	2.26773e-32	0.00780411	0.00138138	0.00660994	0.00159406	0.0126161	0.0128123	0.00217753	0.00359035	0.0192521	0.013903	0.0238929	0.0158686	0.00555737	0.00750885	0.00951659	0.00300962	0.00335969	0.00284912	0.0046246	0.00702025	0.00283978	0.00477265	0.00602775	0.00858857	0.00256874	0.00227713	0.00305657	0.00324544	0.00415718	0.00855995	0.00780411	TAF4
3746	4.16994e-10	1.0099e-09	0.0012407	0.000389762	0.00117832	0.000122584	0.000476794	0.00018659	0.000297386	0.00186721	0.000514291	0.000697032	0.000577148	0.000508383	0.00191215	0.00110849	0.00049973	0.00060042	0.000708198	0.000234732	0.000368951	0.0012407	0.00107066	0.00247446	0.00152859	0.00155148	0.000627395	0.00136546	0.000590661	0.000554963	0.00166903	0.00157687	0.00125901	AC004009.1
4287	2.45333e-08	5.70436e-08	0.00104124	0.000642592	0.00091005	0.000324279	0.000159452	0.000103567	0.00112346	0.00130011	0.000197177	0.000102521	5.05773e-05	4.61127e-05	0.00153128	0.00138838	0.00101065	0.000293322	0.000857248	0.000441675	0.00115984	0.00104124	0.00109747	0.00159532	0.0012109	0.00110816	0.00111374	0.00133737	0.00279238	0.000751026	0.00129185	0.00124965	0.00116913	TSPO2
4468	7.13936e-11	1.75826e-10	0.00105512	0.000414416	0.00119183	0.000620769	0.000966322	0.000356285	0.00130764	0.00158195	0.000332629	0.00109538	0.00160852	0.00110325	0.000201998	0.00165085	0.00123674	0.000639798	0.0016787	0.00155991	0.00117731	0.00105512	0.000735482	0.00117651	0.00173879	0.00168683	0.00162398	0.00169949	0.00178834	0.00140033	0.000298135	0.00180165	0.00144474	FOXD2
4517	1.66379e-09	3.97749e-09	0.00121596	0.000106749	0.0011201	0.000691645	0.00183997	0.00221506	0.00101275	0.00113623	0.00423048	0.00209238	0.0041321	0.00260791	0.00149047	0.00100403	0.000585598	0.000164035	0.000948697	0.000860217	0.000798491	0.00121596	0.00046818	0.00148754	0.000759713	0.00119701	0.000923932	0.00123523	0.000954593	0.000128619	0.00137876	0.00113697	0.00089588	SPATA12
4567	0.0038432	0.00768778	0.000476341	0.000243831	0.00099038	0.000275058	0.000660533	0.00068091	0.000777819	0.000402189	0.00041978	0.000519243	0.000231296	0.000266615	0.000431107	0.000796093	0.000504855	0.000236279	4.93345e-05	0.000131908	0.000425679	0.000517152	0.000352967	0.000464056	0.000555277	0.000657127	0.00028936	0.000561243	0.000206138	0.000208128	0.000476341	0.000694315	0.000806507	AC008738.2
5104	0.000622107	0.00128308	0.000850716	6.42899e-06	0.000336357	0.000744623	0.000660909	0.000521604	0.000316059	0.00111063	0.00149486	0.000754894	0.00130039	0.000812086	0.000988449	0.000416351	0.00121508	0.000622772	0.000136545	0.000215461	0.000291745	0.000454632	0.000487505	0.00182338	0.000568335	0.00132578	0.000195507	0.000760314	1.68392e-05	0.000305493	0.000850716	0.00144634	0.000303318	LINC02004
5833	6.10691e-05	0.000130049	0.0011736	0.000295057	0.000812401	7.99983e-05	0.000979474	0.0011377	0.0011736	0.000992259	0.000495234	0.000701862	0.000199515	0.000287181	0.000882674	0.00102134	0.0012252	0.000698337	0.0023503	0.0013585	0.00113204	0.00101318	0.00017417	0.000628295	0.00103821	0.00130764	0.00130519	0.000632474	0.0030152	0.00118041	0.00123837	0.00124609	0.00191677	AL121829.2
5984	0.00134692	0.00274843	0.00123558	0.000435204	0.000782803	0.000706293	0.000468474	0.000374258	0.000651084	0.00105531	0.00139048	0.000323573	0.000140913	0.000166693	0.000954561	0.00111166	0.000354069	6.75221e-05	0.000612215	0.000591129	0.000516674	0.000895884	0.000632031	0.00108519	0.00123558	0.00102813	0.000483066	0.000740121	0.000422709	0.000636439	0.00100383	0.000956938	0.00114961	AC092902.3
6897	4.02411e-05	8.62369e-05	0.00117431	1.8416e-06	0.00153318	1.09434e-05	0.00103208	0.00145045	0.00102345	0.00027487	0.000204282	0.00123924	0.00176941	0.00126914	0.00070571	0.001444	0.00157022	0.00032091	0.000496964	0.000459885	0.000984472	0.00117431	0.000365911	0.00070827	0.000737613	0.00126211	0.000871928	0.000728334	0.0002923	0.000658591	0.00117036	0.00120379	0.000959064	AC007255.1

## Sheet: 3
Top	p.value	FDR	summary.logFC	logFC.1	logFC.2	logFC.4	logFC.5	logFC.6	logFC.7	logFC.8	logFC.9	logFC.10	logFC.11	logFC.12	logFC.13	logFC.14	logFC.15	logFC.16	logFC.17	logFC.18	logFC.19	logFC.20	logFC.21	logFC.22	logFC.23	logFC.24	logFC.25	logFC.26	logFC.27	logFC.28	logFC.29	logFC.30	logFC.31	GeneName
1	0	0	0.775139	0.795639	0.775139	0.707185	0.68604	0.635867	0.743627	0.523275	0.605762	0.692792	0.675017	0.686045	0.413933	0.625766	0.73819	0.757681	0.651919	0.733625	0.632923	0.375178	0.714935	0.548536	0.452637	0.602711	0.67983	0.735769	0.569803	0.717921	0.0282646	0.589855	0.654834	CD52
1	0	0	1.93871	0.594577	1.19813	1.93871	0.350539	0.438843	1.19221	0.722071	0.604497	0.867945	1.96377	1.59073	0.670871	1.46007	1.05491	1.68297	1.54891	0.946512	0.889298	0.781768	0.545545	1.21212	0.172531	1.34468	1.01229	0.909389	0.950296	0.285739	0.396373	1.30744	1.92397	RPS27A
1	0	0	1.68299	0.488459	0.787419	1.68299	0.391869	0.629319	1.27083	1.18114	0.869196	0.686057	1.41257	1.14471	1.29047	1.5178	1.18762	1.4011	1.34713	0.612633	1.33757	0.880865	0.708634	1.32724	0.540971	1.51188	0.565768	1.0184	0.523671	0.345093	0.315824	1.4413	1.80099	RPS29
2	0	0	1.83255	0.443971	1.01375	1.83255	0.0794925	0.206841	1.29767	0.691991	0.633145	0.51506	1.33183	1.09784	0.677089	1.33892	1.08155	1.69585	1.78765	0.655028	1.22222	0.739012	0.439595	0.99043	0.559677	1.28544	0.826332	0.880643	0.908771	0.050593	0.818793	1.24899	1.83636	RPS8
2	0	0	2.10223	0.961945	1.27271	2.10223	0.964872	0.856342	1.61333	1.32351	1.09721	1.39004	2.30536	1.95384	1.18064	1.85092	1.73662	1.74332	1.61548	1.20545	1.6054	1.14369	0.932887	1.83018	0.719218	1.85949	1.16142	1.39118	1.12698	0.682282	0.400977	1.84813	2.36459	RPS27
2	0	0	1.83961	0.757221	1.24486	1.83961	0.629759	0.640701	0.959666	1.00682	0.753947	1.07761	2.02142	1.69451	0.81639	1.36359	0.975654	1.64072	1.17999	1.12798	0.942357	0.767262	0.63986	1.44414	0.399892	1.36552	0.873844	0.850804	0.450072	0.477552	0.500583	1.31799	1.62354	RPL21
2	0	0	0.557397	0.615688	0.612706	0.590458	0.570995	0.530333	0.630163	0.367292	0.477518	0.575443	0.528708	0.568965	0.333333	0.53265	0.581738	0.663861	0.741561	0.464705	0.559229	0.323244	0.557397	0.381997	0.216468	0.475506	0.582003	0.585362	0.709536	0.495894	0.28327	0.464603	0.498489	CD37
3	0	0	0.992538	1.12938	1.10897	1.03727	1.69668	1.54152	1.16542	0.857107	1.30726	1.67561	1.63021	1.64616	0.682269	0.861009	1.4771	1.16577	0.984826	0.899204	1.22439	0.674972	0.992538	0.686831	0.854445	0.912851	0.866802	0.994486	1.01721	0.916504	0.0302343	0.858931	0.868495	CXCR4
3	0	0	0.482858	0.515696	0.509434	0.465173	0.434211	0.390287	0.574547	0.282631	0.326183	0.436172	0.39735	0.428798	0.253487	0.445227	0.512	0.540369	0.559852	0.359082	0.448756	0.34225	0.482858	0.411366	0.380898	0.389039	0.457251	0.530948	0.467672	0.412273	0.366362	0.390903	0.389228	MS4A1
4	0	0	1.68141	0.545795	1.00993	1.68141	0.249924	0.332876	1.25322	0.510233	0.528881	0.733187	1.55369	1.33809	0.529396	1.26997	0.933548	1.49766	1.44549	0.650339	1.11985	0.557198	0.630455	1.04324	0.330005	1.23279	0.885177	0.989308	0.924377	0.19372	0.636756	1.18554	1.64274	RPS23
5	0	0	1.33173	0.326263	0.662228	1.33173	0.10669	0.218895	0.793343	0.474213	0.335257	0.410518	1.06074	0.892817	0.425633	1.06425	0.516042	0.981205	1.0197	0.572204	0.687792	0.48928	0.336803	0.791308	0.29213	1.01516	0.609377	0.56762	0.501194	0.0876189	0.418034	0.980333	1.39453	RPL9
5	0	0	0.625978	0.71733	0.691179	0.647542	0.543831	0.483527	0.749647	0.384992	0.457379	0.57989	0.526323	0.580132	0.289641	0.535946	0.614959	0.72475	0.860198	0.660315	0.57089	0.475681	0.625978	0.40912	0.501724	0.502482	0.758543	0.687928	0.614282	0.658823	0.267882	0.496118	0.591011	LTB
5	0	0	1.9148	0.443319	0.94095	1.9148	0.24261	0.205491	0.813299	0.521782	0.173539	0.883788	1.71472	1.4756	0.369866	1.43443	0.849265	1.44983	1.57026	0.841205	0.910638	0.604413	0.323729	1.08681	0.381491	1.35677	0.887967	0.683128	1.12874	0.126765	0.455825	1.31418	2.1041	EEF1A1
5	0	0	1.66775	0.508448	0.775449	1.66775	0.597256	0.643438	1.34522	0.965391	0.884799	0.892853	1.74834	1.39821	1.06183	1.47571	1.12181	1.21557	1.3582	0.658713	1.41039	0.792293	0.736053	1.39192	0.772491	1.43892	0.769954	1.09859	0.542902	0.379014	0.509002	1.36173	1.79568	RPLP2
5	0	0	1.79445	0.426867	0.906556	1.79445	0.378922	0.421812	1.09696	1.00457	0.559189	1.01881	2.11296	1.81595	0.716992	1.47008	0.919931	1.4909	1.42755	0.685808	1.05069	0.835693	0.439079	1.09063	0.725213	1.42958	0.797996	0.756292	0.51006	0.0903307	0.540983	1.38548	2.08641	RPL13A
6	0	0	1.93231	0.412545	0.982308	1.93231	0.30349	0.28356	1.27125	0.751232	0.790759	0.803169	1.94841	1.53472	0.834629	1.507	1.17199	1.70089	1.547	0.836783	1.09957	0.781099	0.460783	1.32342	0.263952	1.44274	0.805097	0.961707	0.609368	0.219641	0.591489	1.41616	1.90085	RPL32
7	0	0	1.32455	0.28317	0.715873	1.32455	0.0908274	0.228964	1.07685	0.462786	0.495363	0.522603	1.20693	1.02378	0.408919	0.986701	0.744449	1.15354	1.09235	0.354791	0.80324	0.362253	0.358321	0.829662	0.67169	0.91723	0.616406	0.825674	0.843884	0.0416918	0.338015	0.878812	1.38434	RPS16
8	0	0	0.244091	0.282883	0.286747	0.257345	0.26539	0.233749	0.354244	0.138339	0.201096	0.265947	0.249056	0.261442	0.125704	0.244091	0.278729	0.302039	0.345743	0.171237	0.263432	0.189563	0.277159	0.115925	0.200276	0.220913	0.238714	0.301865	0.245766	0.206371	0.21052	0.219402	0.211896	BANK1
8	0	0	1.65559	0.626414	1.04316	1.65559	0.502713	0.496433	1.04134	0.650511	0.639278	0.789765	1.33056	1.20851	0.580985	1.31918	0.93803	1.48468	1.4005	0.807337	0.953483	0.686286	0.552477	0.94004	0.317587	1.25787	0.843269	0.869257	0.733272	0.363117	0.368807	1.19618	1.54116	RPL30
8	0	0	1.72784	0.499283	0.968909	1.72784	0.277602	0.398298	1.21252	0.874354	0.677831	0.745417	1.50652	1.31224	0.918212	1.22006	1.06944	1.47622	1.3063	0.846164	1.16	0.744667	0.580986	1.35277	0.666396	1.18272	0.753774	0.966834	0.717629	0.27229	0.338068	1.15237	1.70683	RPS15A
9	0	0	0.447895	0.508644	0.49415	0.415855	0.603066	0.532521	0.559087	0.246055	0.392376	0.607485	0.508862	0.593531	0.179372	0.0426201	0.476806	0.527393	0.642545	0.356142	0.435221	0.334204	0.447895	0.26527	0.347213	0.114793	0.501468	0.503689	0.634836	0.407189	0.304074	0.0240624	0.330981	CD79A
10	0	0	0.92999	0.177375	0.408667	0.928786	0.176871	0.0510142	0.488066	0.581814	0.337969	0.468646	1.12713	0.903049	0.521689	0.833518	0.550208	0.713976	0.601958	0.471691	0.598864	0.526216	0.140886	0.866583	0.244431	0.92999	0.313039	0.370049	0.328941	0.0605897	0.317228	0.918385	1.04331	RPL31
10	4.79328e-300	4.977e-298	0.317444	0.37028	0.361203	0.32267	0.435946	0.374304	0.428391	0.185012	0.286652	0.434588	0.40879	0.423262	0.132715	0.274431	0.447469	0.425756	0.522391	0.265393	0.346723	0.240754	0.317444	0.316013	0.254141	0.237991	0.384018	0.376429	0.395042	0.305989	0.210365	0.229093	0.278886	VPREB3
11	0	0	1.3414	0.243821	0.702099	1.3414	0.143288	0.248065	0.835293	0.460382	0.344186	0.4547	1.17211	0.942542	0.43228	0.976231	0.463255	1.08476	1.0321	0.519865	0.572729	0.33771	0.284472	0.734577	0.342613	0.970479	0.585613	0.656253	0.352267	0.034744	0.443093	0.94437	1.32421	RPS13
12	0	0	1.59611	0.402265	0.844062	1.59611	0.35048	0.322006	0.902197	0.678286	0.515411	0.780033	1.80877	1.468	0.65256	1.32055	0.721781	1.37549	1.38561	0.649295	0.573401	0.628146	0.255558	0.804342	0.207827	1.30017	0.87151	0.688718	0.683835	0.123079	0.531948	1.24313	1.75119	RPL11
12	0	0	0.33472	0.175571	0.204518	0.251398	0.103801	0.109869	0.218397	0.17312	0.082247	0.108554	0.0937266	0.09956	0.314935	0.315506	0.241661	0.231476	0.237125	0.138296	0.282484	0.085617	0.239047	0.0868573	0.0647478	0.335318	0.152276	0.192961	0.122412	0.141663	0.0945583	0.33472	0.283483	REL
12	0	0	1.34418	0.493161	0.915025	1.34418	0.413683	0.314301	0.77436	0.502096	0.316235	0.737879	1.18782	1.09	0.486916	1.03769	0.689346	1.22175	1.09284	0.636202	0.74398	0.488992	0.341865	0.686654	0.334916	0.979132	0.635505	0.641616	0.860162	0.190774	0.421403	0.948842	1.3015	RPS20
13	0	0	0.279653	0.27402	0.284864	0.285847	0.163926	0.161727	0.318532	0.136428	0.157551	0.175575	0.140674	0.17413	0.128699	0.21991	0.222543	0.289738	0.313467	0.211923	0.239389	0.0789829	0.279653	0.121002	0.159512	0.182458	0.251861	0.292527	0.239003	0.227234	0.00771284	0.193799	0.256168	CD48
14	0	0	1.70306	0.314465	0.73145	1.70306	0.310962	0.359936	1.37918	0.640574	0.368006	0.837038	1.94507	1.58861	0.660936	1.28852	0.942932	1.07668	1.4803	0.675044	0.962122	0.623264	0.365837	1.20585	0.41334	1.21304	0.717035	1.02549	0.483673	0.099644	0.406049	1.14756	1.86436	RPS14
14	0	0	1.58795	0.302791	0.655261	1.58795	0.22207	0.260787	1.15938	0.954227	0.633034	0.495883	1.31991	1.00415	0.917323	1.2883	0.750962	0.999754	1.24363	0.666287	1.05488	0.515625	0.414783	1.17246	0.358654	1.25719	0.684561	0.912536	0.678441	0.10093	0.502379	1.24091	1.66968	RPL39
16	0	0	1.92538	0.370864	0.860861	1.92538	0.427647	0.286345	1.16736	0.778474	0.477186	0.871227	1.96449	1.52984	0.747747	1.40821	1.31544	1.6959	1.86249	0.70898	0.980557	0.785725	0.139858	1.24966	0.632166	1.34324	0.792933	0.804932	0.54051	0.0648738	0.423726	1.29596	2.20931	RPL13
16	1.02781e-211	6.02634e-210	0.161877	0.168434	0.171044	0.156773	0.203189	0.183116	0.194153	0.101035	0.151538	0.198037	0.172847	0.192109	0.0926516	0.153224	0.173058	0.189832	0.175128	0.0856543	0.157026	0.122614	0.161877	0.138518	0.136852	0.132831	0.12284	0.173187	0.140676	0.116804	0.129461	0.128324	0.11421	TNFRSF13C
17	0	0	2.02208	0.60905	1.06685	2.02208	0.433356	0.432167	1.27687	0.681721	0.66393	0.999263	1.91623	1.6113	0.5706	1.07275	1.29463	1.43472	1.73078	1.06198	0.70968	0.56914	0.494035	1.44959	0.143727	1.02594	0.860032	1.08605	0.74861	0.368911	0.334886	0.998161	2.22035	RPL10
17	0	0	1.34131	0.201933	0.565611	1.34131	0.0715859	0.134543	1.14277	0.708136	0.696687	0.379119	0.864379	0.73741	0.724656	1.3275	1.15009	1.18682	1.02336	0.244915	1.2656	0.320724	0.49598	0.866364	0.718424	1.26061	0.561089	0.866562	0.3482	0.0337296	0.261605	1.22963	1.59975	RPL28
18	1.73962e-222	1.1029e-220	0.132255	0.147397	0.151698	0.144389	0.17015	0.141731	0.167735	0.0877402	0.135428	0.182927	0.20181	0.193053	0.0771708	0.132255	0.141105	0.159736	0.173594	0.108336	0.124348	0.0642456	0.113838	0.0348755	0.0341206	0.10375	0.120881	0.14453	0.157371	0.100304	0.0300917	0.098485	0.113291	TNFAIP8
19	3.60028e-217	2.2034e-215	0.138053	0.141754	0.146741	0.130909	0.0652162	0.0259035	0.169826	0.0835416	0.0541638	0.0838614	0.0860911	0.0868339	0.0851153	0.138053	0.15189	0.159525	0.181943	0.0873083	0.128671	0.0936728	0.140722	0.109905	0.103951	0.12719	0.125771	0.13944	0.329073	0.10534	0.121057	0.127191	0.108114	BCL11A
19	2.65692e-282	2.50303e-280	0.235214	0.240179	0.235214	0.220177	0.200592	0.179482	0.226922	0.134039	0.153782	0.207871	0.188886	0.206084	0.108458	0.188132	0.222898	0.241219	0.230913	0.2086	0.182529	0.0984567	0.211365	0.180715	0.152536	0.160568	0.22585	0.211402	0.229633	0.208415	0.0462408	0.157895	0.204786	LIMD2
20	5.6714e-214	3.39656e-212	0.128178	0.132269	0.136137	0.125228	0.0757386	0.0708311	0.140525	0.0630357	0.0598373	0.0762854	0.0677046	0.0751901	0.0679863	0.128178	0.108935	0.15066	0.167987	0.0838736	0.131019	0.0832867	0.118443	0.040932	0.0918985	0.10948	0.112349	0.119264	0.110654	0.0937473	0.0668617	0.0988774	0.0934238	FCMR
20	0	0	1.57726	0.394078	0.80282	1.57726	0.153229	0.216812	1.04409	0.558309	0.483046	0.654978	1.55826	1.28427	0.538217	1.24136	0.872819	1.31385	1.41861	0.514855	0.894043	0.49451	0.426418	0.830987	0.33304	1.16455	0.752898	0.779414	0.725091	0.130953	0.425436	1.11931	1.69413	RPL19
20	0	0	0.844113	0.179998	0.292548	0.819102	0.053713	0.0867951	0.553461	0.319611	0.337872	0.198398	0.582677	0.441539	0.39528	0.867923	0.446057	0.605388	0.678375	0.207929	0.709018	0.303005	0.281249	0.425733	0.0807108	0.844113	0.240058	0.381367	0.128263	0.0662114	0.279328	0.831807	0.91692	RPL38
21	1.27144e-211	7.44178e-210	0.132944	0.1355	0.141572	0.125801	0.208709	0.17888	0.172341	0.0773247	0.132727	0.20788	0.175748	0.202411	0.0498714	0.132944	0.155964	0.175712	0.203421	0.0820059	0.140062	0.0985126	0.0901841	0.108469	0.108452	0.119377	0.124364	0.133388	0.178004	0.0966866	0.10588	0.107076	0.1101	ARHGAP24
22	2.11957e-244	1.59386e-242	0.641521	0.1343	0.248265	0.430363	0.249246	0.117317	0.464014	0.197486	0.036886	0.436536	0.606371	0.570319	0.101513	0.355148	0.312214	0.364943	0.337651	0.280581	0.131562	0.183343	0.057638	0.608514	0.200309	0.272123	0.253676	0.394086	0.106926	0.11874	0.0550364	0.265195	0.641521	EEF1D
22	0	0	1.22951	0.461054	0.721731	1.22951	0.300122	0.342997	0.851086	0.56851	0.514955	0.54421	1.04623	0.882441	0.551311	0.966204	0.804167	0.989553	0.841301	0.685779	0.799991	0.593662	0.48882	0.797498	0.239648	1.00769	0.620588	0.726444	0.567379	0.292111	0.379375	0.990442	1.23858	RPS25
22	0	0	0.387188	0.237508	0.325677	0.387188	0.201147	0.0793484	0.209069	0.13362	0.217652	0.323161	0.344742	0.351682	0.074903	0.318928	0.354033	0.364088	0.389056	0.300074	0.297126	0.0489204	0.24463	0.204905	0.0867758	0.344897	0.303193	0.179527	0.384708	0.20429	0.151813	0.337502	0.361367	NAP1L1
23	1.22216e-207	6.87734e-206	0.12559	0.126111	0.127496	0.115838	0.235327	0.202246	0.147524	0.115822	0.133977	0.233396	0.213188	0.227235	0.121021	0.12559	0.154043	0.135379	0.0821063	0.0744125	0.123426	0.0526569	0.109572	0.07486	0.121316	0.109907	0.0957409	0.132312	0.113981	0.0869028	0.120811	0.112135	0.0954511	IRF8
24	0	0	0.242436	0.255455	0.249678	0.234704	0.337861	0.317369	0.28229	0.18119	0.301819	0.33431	0.324137	0.33086	0.150654	0.182979	0.284157	0.26688	0.249658	0.19736	0.228487	0.046832	0.242436	0.225436	0.141041	0.178922	0.244972	0.264301	0.297438	0.215497	0.0216655	0.18384	0.199885	CD53
25	1.41076e-282	1.33279e-280	0.295702	0.306293	0.295702	0.259305	0.346416	0.299726	0.322937	0.124865	0.227002	0.347587	0.319564	0.339508	0.107939	0.20163	0.278344	0.315437	0.368002	0.241801	0.231571	0.200792	0.26391	0.183688	0.200216	0.161569	0.322856	0.30094	0.236897	0.26124	0.161141	0.156993	0.230815	CD79B
27	1.4207e-180	6.42147e-179	0.143164	0.15052	0.150765	0.121814	0.181329	0.164237	0.183142	0.0804463	0.136085	0.175338	0.177347	0.17094	0.0648616	0.118669	0.148291	0.159303	0.11809	0.0888974	0.128273	0.019721	0.143164	0.112018	0.116585	0.108309	0.10844	0.157478	0.169224	0.108274	0.0982094	0.108925	0.0881324	MARCH1
31	1.51553e-177	6.64414e-176	0.129923	0.128644	0.129612	0.114864	0.0924114	0.088049	0.160905	0.0609436	0.0841371	0.0905072	0.0749498	0.0888201	0.0592125	0.0876807	0.108975	0.131438	0.202469	0.0783523	0.105835	0.0848924	0.129923	0.069015	0.0961234	0.0643301	0.117105	0.139801	0.152286	0.098319	0.0929256	0.0632171	0.0984434	TNFRSF13B
32	0	0	1.37132	0.304599	0.617135	1.37132	0.297058	0.310592	0.924217	0.71892	0.533665	0.683913	1.40418	1.18826	0.593198	1.0368	0.920068	1.04987	1.0675	0.623468	1.00583	0.625351	0.414086	0.942442	0.48739	1.04759	0.691704	0.708138	0.621437	0.210499	0.324281	0.979467	1.47038	RPL23A
34	6.6044e-223	4.20301e-221	0.250532	0.286134	0.285177	0.313183	0.245219	0.237408	0.284475	0.179714	0.190088	0.24448	0.214045	0.237305	0.189703	0.275702	0.445391	0.342727	0.255827	0.171585	0.314784	0.0379161	0.245673	0.264493	0.105308	0.250532	0.173816	0.245332	0.135895	0.196609	0.225264	0.236023	0.284085	CD83
35	8.09969e-233	5.58945e-231	0.190397	0.196809	0.202213	0.179452	0.114231	0.115684	0.225655	0.0799617	0.140628	0.111898	0.109604	0.111771	0.0770952	0.162147	0.155849	0.209639	0.237086	0.117947	0.163294	0.0730161	0.190397	0.0771293	0.122694	0.13514	0.173898	0.192265	0.24679	0.143371	0.117321	0.124988	0.141822	POU2F2
36	5.84698e-171	2.39141e-169	0.116245	0.112415	0.109458	0.114151	0.140933	0.127567	0.0965909	0.116903	0.114528	0.147219	0.125305	0.146022	0.108872	0.0988547	0.127767	0.109148	0.0649737	0.123662	0.103468	0.103349	0.107156	0.143846	0.113986	0.117289	0.102852	0.102262	0.043631	0.111609	0.086452	0.116245	0.118092	CCR7
38	5.29759e-134	1.45274e-132	0.0921538	0.0942469	0.0962825	0.0890673	0.0690082	0.0640183	0.117234	0.0567975	0.0539372	0.0688831	0.064108	0.0677831	0.0622037	0.0768112	0.0967482	0.105904	0.0893885	0.0559879	0.0976553	0.0561139	0.0921538	0.0565988	0.0741239	0.0712455	0.0771005	0.100484	0.0922431	0.0681298	0.0293527	0.05916	0.0668816	SP140
39	3.59386e-208	2.03256e-206	0.168165	0.17005	0.16516	0.0736789	0.0627258	0.0593806	0.203378	0.0545831	0.0644996	0.0590917	0.0436063	0.0517317	0.0479695	0.138979	0.120416	0.175526	0.210697	0.0809759	0.151124	0.10475	0.168165	0.0393254	0.115661	0.110009	0.13767	0.173803	0.18939	0.120346	0.119999	0.102899	0.127938	RALGPS2
41	9.03857e-134	2.46652e-132	0.121936	0.13292	0.129885	0.108433	0.250155	0.21638	0.162233	0.0996781	0.167733	0.247121	0.235117	0.241531	0.0704469	0.0755391	0.186121	0.14698	0.101921	0.08643	0.131402	0.0990409	0.121936	0.12612	0.110755	0.0796357	0.101651	0.135034	0.137302	0.0998002	0.0847348	0.0759402	0.0906039	LINC01781
43	1.31349e-167	5.14023e-166	0.13236	0.141107	0.145803	0.121688	0.0500909	0.059126	0.14834	0.033266	0.0879238	0.0613734	0.0844064	0.0759153	0.0367609	0.148787	0.149588	0.172785	0.221738	0.0881209	0.143434	0.082126	0.141102	0.0953768	0.0969413	0.13236	0.120824	0.127192	0.238853	0.11322	0.0463586	0.119428	0.149655	MYCBP2
45	3.42821e-134	9.40877e-133	0.0808465	0.0784552	0.078911	0.0705543	0.0603992	0.0585199	0.112308	0.0474876	0.0697815	0.0590956	0.055694	0.0583998	0.045399	0.0676213	0.0995774	0.0857755	0.0881194	0.046381	0.0822239	0.0596459	0.0808465	0.0181259	0.0638553	0.0638456	0.071849	0.0893021	0.123925	0.0596922	0.0642085	0.0640021	0.0535395	BLK
47	3.9106e-129	1.02145e-127	0.0790422	0.0822955	0.082829	0.0806879	0.144791	0.128751	0.0903	0.0760476	0.105253	0.141176	0.127282	0.137382	0.0743092	0.0790422	0.100618	0.0961161	0.136853	0.0582396	0.0748194	0.0769956	0.0784089	0.0851664	0.0797712	0.0721704	0.0776669	0.0819285	0.091637	0.0661899	0.0784504	0.071027	0.0759892	LINC00926
48	5.44507e-112	1.18891e-110	0.103806	0.104856	0.106385	0.11074	0.146212	0.137488	0.124578	0.0835739	0.117939	0.143783	0.124554	0.13994	0.08229	0.0699098	0.157122	0.121558	0.140549	0.0669756	0.120908	0.0925412	0.103806	0.0455258	0.092332	0.0763911	0.084981	0.102188	0.144801	0.0733844	0.0771461	0.0701203	0.106495	LY9
49	2.71689e-146	8.57995e-145	0.109063	0.0982834	0.108945	0.129108	0.0861029	0.0913864	0.105294	0.065188	0.0791656	0.0823679	0.0758788	0.0809982	0.0910942	0.0738285	0.13803	0.124883	0.109083	0.077162	0.133948	0.0370474	0.109063	0.141169	0.0965129	0.067156	0.0775686	0.0995422	0.0543601	0.0846332	0.00761223	0.06862	0.116682	PDE4B
51	2.79855e-121	6.68027e-120	0.0979752	0.113706	0.10438	0.0973095	0.150915	0.128923	0.0932242	0.0898163	0.123081	0.159563	0.143806	0.159556	0.0618822	0.0746851	0.0868126	0.0929724	0.0657604	0.125185	0.065986	0.0540969	0.0979752	0.0786637	0.0896873	0.0771782	0.11329	0.096608	0.168367	0.112775	0.0515505	0.0774703	0.096664	SELL
51	8.41785e-225	5.47127e-223	0.162828	0.167461	0.168577	0.154056	0.0882893	0.0869711	0.186369	0.082557	0.0940307	0.0894806	0.0910116	0.0897718	0.0730814	0.135078	0.12508	0.167339	0.161139	0.129511	0.11662	0.0790678	0.162828	0.119409	0.123692	0.122446	0.143496	0.17502	0.237754	0.138014	0.0692083	0.121958	0.130248	RIPOR2
51	0	0	1.23493	0.197384	0.464332	1.23493	0.147679	0.206782	0.925419	0.67459	0.376469	0.517342	1.4287	1.1	0.629193	0.980621	0.979832	0.877911	0.928369	0.41905	0.8936	0.481419	0.317308	0.929742	0.311363	0.989167	0.403806	0.714574	0.13221	0.0308527	0.358634	0.929114	1.45317	RPL27A
52	2.43416e-162	9.08086e-161	0.099909	0.0962234	0.0997794	0.0944093	0.0812387	0.0848115	0.117275	0.0562655	0.0887839	0.0765155	0.0666239	0.0751431	0.0660369	0.099909	0.128126	0.112494	0.132011	0.0632645	0.111055	0.0504483	0.0967786	0.117853	0.066894	0.0910021	0.089326	0.107046	0.185274	0.0822761	0.0298308	0.0860786	0.0880699	INPP5D
52	2.90827e-210	1.67879e-208	0.187949	0.106743	0.124094	0.106455	0.130722	0.116223	0.155051	0.0852897	0.0941511	0.132475	0.113834	0.128998	0.10757	0.148429	0.149741	0.132159	0.0265077	0.0680131	0.201585	0.0872312	0.148962	0.0351304	0.101836	0.187949	0.0631065	0.114419	0.0821445	0.0824437	0.0387748	0.170982	0.15175	SMCHD1
57	4.02588e-233	2.79545e-231	0.16354	0.192538	0.183169	0.171004	0.183402	0.16748	0.174042	0.124257	0.161807	0.19095	0.176485	0.191622	0.0904778	0.138117	0.18532	0.184964	0.17567	0.182557	0.143627	0.0109965	0.16354	0.165166	0.11896	0.127669	0.180805	0.17058	0.237251	0.178861	0.00806012	0.120212	0.171011	GPSM3
58	4.79707e-215	2.89881e-213	0.306347	0.164422	0.210046	0.306347	0.193285	0.0890191	0.205563	0.0907916	0.0447184	0.28928	0.349711	0.338453	0.0923245	0.263622	0.299047	0.272031	0.261097	0.196815	0.210421	0.19788	0.0952286	0.249727	0.11185	0.255727	0.2045	0.172659	0.023101	0.079216	0.108856	0.235751	0.369537	NOP53
59	1.97297e-141	5.95584e-140	0.105583	0.102661	0.112347	0.0935801	0.079179	0.0681273	0.117763	0.0422691	0.0860647	0.0798867	0.0782712	0.0801261	0.0384312	0.0904544	0.0899309	0.116033	0.1214	0.0708965	0.0835771	0.0511259	0.105583	0.0310848	0.0841478	0.0797141	0.083441	0.0863955	0.143528	0.075329	0.0185231	0.0785915	0.0859649	ATM
62	2.8454e-206	1.58257e-204	0.237712	0.236609	0.237712	0.0883749	0.149652	0.09238	0.131676	0.0654358	0.160872	0.176474	0.206088	0.178733	0.0337584	0.229609	0.261532	0.279397	0.265793	0.1669	0.225559	0.191381	0.207855	0.0881009	0.123138	0.21079	0.194148	0.104828	0.24882	0.18375	0.0597692	0.18859	0.233745	PNISR
66	9.89297e-111	2.12823e-109	0.0671846	0.0765355	0.0748447	0.0647423	0.103142	0.0939367	0.0892409	0.0439758	0.0923783	0.100482	0.109588	0.099041	0.0385381	0.0606276	0.0968026	0.0835508	0.0995034	0.0553729	0.0776213	0.0517883	0.0671846	0.0388969	0.0511425	0.0520579	0.0866354	0.0799532	0.0690202	0.0648759	0.0540966	0.0493831	0.0570566	CD19
73	1.35674e-162	5.09543e-161	0.116978	0.12655	0.130926	0.121268	0.123536	0.108182	0.133793	0.0449168	0.0617347	0.124096	0.107649	0.12092	0.0513588	0.100728	0.122333	0.14411	0.176852	0.0809446	0.120767	0.0672831	0.116978	0.0637417	0.0587293	0.083904	0.109437	0.109619	0.154196	0.0909937	0.0711963	0.0745575	0.0921797	ORAI2
75	2.7657e-95	4.90254e-94	0.0760236	0.0753438	0.0760236	0.0654056	0.0773989	0.060703	0.0748056	0.0373405	0.0481019	0.0782731	0.071787	0.077294	0.027248	0.0582073	0.0793896	0.0821328	0.0920152	0.0525294	0.0644974	0.0510162	0.0658017	0.0394701	0.0583623	0.0497552	0.0772366	0.0573591	0.0856471	0.0613407	0.0290594	0.0499114	0.0607506	BCAS4
77	1.45022e-143	4.47857e-142	0.0919796	0.0858929	0.0883256	0.0583825	0.0405693	0.0397802	0.113263	0.0228101	0.0368068	0.0393296	0.0473289	0.0398363	0.0457383	0.0919796	0.0933155	0.094922	0.11253	0.0557934	0.0963047	0.0414849	0.0898327	0.0160445	0.0629362	0.0802457	0.0869002	0.0939731	0.132634	0.0693078	0.0405585	0.0783652	0.0872282	TRIM38
79	1.15247e-140	3.42049e-139	0.12461	0.0825499	0.0943476	0.0255262	0.0537621	0.0173794	0.117892	0.01718	0.0470862	0.0875586	0.0927235	0.0944767	0.0538759	0.142351	0.136748	0.144065	0.204778	0.0626915	0.117551	0.100422	0.0830276	0.0534076	0.0570989	0.12461	0.0881369	0.0893534	0.16668	0.0635835	0.0393918	0.117253	0.156743	TAF1D
79	4.34101e-109	9.1623e-108	0.0926843	0.0966645	0.0926843	0.0858439	0.0633184	0.0589694	0.0958146	0.0434593	0.0793339	0.0623745	0.0710402	0.0628342	0.0311685	0.0757633	0.0797263	0.0951662	0.128346	0.0822518	0.0670276	0.052254	0.0855546	0.0781647	0.0695646	0.0599475	0.10289	0.0977082	0.149163	0.0884426	0.0538863	0.0623473	0.0803857	HVCN1
82	2.40444e-178	1.05966e-176	0.15009	0.105964	0.100499	0.0777343	0.0593673	0.0420717	0.110681	0.00687128	0.0432347	0.0791368	0.115431	0.0907995	0.0359923	0.157899	0.148649	0.139657	0.158149	0.0780838	0.156863	0.0640623	0.113878	0.0862963	0.0484857	0.15009	0.0731886	0.0926504	0.199283	0.0992238	0.00463064	0.133206	0.135494	SCAF11
88	2.61721e-114	5.82068e-113	0.0948739	0.097611	0.0948739	0.0809235	0.0746872	0.0648822	0.104564	0.0403243	0.0503524	0.0751664	0.066175	0.0733004	0.0272238	0.0736734	0.119934	0.106014	0.0838935	0.0565062	0.0871623	0.0534394	0.0802283	0.0781374	0.061291	0.0612032	0.0682321	0.0915376	0.130201	0.0696332	0.0499436	0.0549375	0.0573919	FCRLA
92	2.19339e-109	4.647e-108	0.0703501	0.0750806	0.0750795	0.0647906	0.0517993	0.04656	0.0851213	0.0294297	0.0470532	0.0528591	0.0500733	0.0524891	0.0236656	0.0633628	0.0602328	0.0774405	0.0771758	0.0327586	0.0580396	0.0347579	0.0703501	0.0357742	0.052054	0.0514366	0.0504979	0.0754285	0.0834201	0.0469137	0.043255	0.0472577	0.0441813	AIM2
93	2.40439e-100	4.58955e-99	0.0577228	0.0635625	0.0653363	0.0616848	0.0922686	0.076858	0.0703187	0.0392577	0.0515035	0.091813	0.0817118	0.0889577	0.0426973	0.0577228	0.0799121	0.0714406	0.0741497	0.0354683	0.0632722	0.044894	0.0619113	0.0454511	0.0500852	0.054019	0.049898	0.0633723	0.129522	0.0427474	0.0570206	0.0520705	0.0480114	LINC02397
95	2.77171e-95	4.91059e-94	0.0704148	0.0732907	0.0704148	0.0582305	0.0726623	0.0572629	0.071904	0.0366174	0.0390965	0.0763523	0.0757913	0.0758701	0.0255948	0.0369668	0.0548009	0.0717387	0.102798	0.0673499	0.0507319	0.0422291	0.0625495	0.0428953	0.0523082	0.0316892	0.0858507	0.0724731	0.0776323	0.0677306	0.0409303	0.0322016	0.048788	HLA-DOB
97	4.29268e-75	5.80516e-74	0.0958372	0.0728982	0.086274	0.0958372	0.0743196	0.0508281	0.0638981	0.0411351	0.0634413	0.11675	0.136598	0.127634	0.0420198	0.0839881	0.0867822	0.102128	0.130996	0.0634623	0.0909314	0.0425823	0.0720986	0.0493925	0.0532182	0.0567801	0.0862703	0.0486515	0.11931	0.0481603	0.0328296	0.0497597	0.0982546	PARP1
98	2.83326e-120	6.68226e-119	0.0783499	0.0833067	0.0829244	0.0664125	0.0495656	0.048051	0.105268	0.0299372	0.0522099	0.0470252	0.046374	0.0465307	0.0210303	0.0635491	0.0945256	0.0832882	0.0872248	0.0475719	0.0720538	0.0384399	0.0783499	0.0248895	0.0494983	0.0529737	0.064741	0.0873369	0.104412	0.0587771	0.0454423	0.0520304	0.0496574	TLR10
99	2.80779e-136	7.93324e-135	0.104769	0.12039	0.12427	0.127424	0.144747	0.116525	0.136619	0.052014	0.104945	0.15496	0.162468	0.15791	0.0588479	0.10177	0.152	0.145316	0.153493	0.100194	0.118678	0.0838542	0.104769	0.105384	0.0992433	0.0903372	0.12069	0.132074	0.142842	0.0957755	0.0668435	0.0864591	0.126204	TMEM243
99	1.4693e-125	3.65017e-124	0.0674735	0.0546796	0.0569313	0.0373707	0.0624865	0.0552118	0.0789088	0.0235865	0.0420837	0.0615422	0.0647484	0.0619593	0.0372797	0.0674735	0.0719932	0.052249	0.0260168	0.0378592	0.0620925	0.0216546	0.0557589	0.0620148	0.0591877	0.0633537	0.0446107	0.0733532	0.0490808	0.0486712	0.00620575	0.0628711	0.0426304	TRIM22
99	2.18282e-134	6.00553e-133	0.0840086	0.0891542	0.0891939	0.0845755	0.0606955	0.0577167	0.107463	0.0352665	0.0518212	0.0591638	0.0452878	0.0576121	0.039171	0.0840086	0.0786256	0.0983014	0.166067	0.0649358	0.0759717	0.0575848	0.0872929	0.0583845	0.00654134	0.0682337	0.111773	0.100421	0.140585	0.0758784	0.0674278	0.0696937	0.0757878	CD22
102	7.95659e-179	3.52974e-177	0.15211	0.161429	0.160348	0.141163	0.112191	0.0952944	0.18692	0.0598401	0.0831786	0.115828	0.111502	0.118466	0.0635502	0.136906	0.179799	0.172672	0.211175	0.115227	0.168257	0.0751015	0.15211	0.0982328	0.106625	0.12826	0.147078	0.163312	0.236951	0.13678	0.0610373	0.121265	0.135616	SP110
104	5.93699e-170	2.39589e-168	0.112202	0.109609	0.116396	0.116596	0.0737417	0.0840472	0.127383	0.0697885	0.102164	0.0693519	0.0742753	0.07087	0.0662287	0.111532	0.129368	0.120772	0.131842	0.0783349	0.127526	0.0610778	0.115041	0.076127	0.051485	0.112202	0.0926473	0.111392	0.185516	0.0860291	0.0242212	0.103974	0.0953695	ANKRD44
105	7.7636e-173	3.2385e-171	0.148171	0.114267	0.123506	0.137314	0.214952	0.198314	0.142523	0.137574	0.148288	0.211564	0.198605	0.206966	0.161057	0.126674	0.152883	0.13014	0.139941	0.0784041	0.16093	0.0402708	0.148171	0.04648	0.13942	0.134498	0.0933695	0.131589	0.118315	0.0866761	0.0650382	0.134381	0.131527	SMAP2
105	6.44254e-115	1.44335e-113	0.0636483	0.0596599	0.0624625	0.0594572	0.0343258	0.0355328	0.0587219	0.0342877	0.036495	0.0324915	0.030853	0.0313555	0.0162986	0.0636483	0.0695648	0.0734711	0.102768	0.0339746	0.0594947	0.0370441	0.0542504	0.064287	0.0492386	0.0583865	0.0565152	0.0611898	0.12612	0.0462208	0.053432	0.0555501	0.0485326	AFF3
106	1.20821e-138	3.50526e-137	0.0769562	0.0722715	0.0793805	0.082337	0.0429835	0.0124092	0.0572524	0.00612849	0.0239506	0.0469976	0.0397954	0.0449346	0.0342045	0.0785137	0.0687661	0.0833344	0.0792855	0.0439211	0.0779553	0.0423163	0.0742737	0.0321788	0.0392094	0.0769562	0.0568185	0.0429825	0.091824	0.0500459	0.0580344	0.0746093	0.0409648	SESN3
106	1.34767e-105	2.71951e-104	0.0781505	0.0800789	0.0814287	0.0654518	0.0484376	0.0416854	0.0976575	0.0298043	0.0452927	0.0479174	0.0454231	0.046993	0.0261149	0.0693435	0.0732148	0.0827612	0.0759674	0.0412006	0.0664979	0.013129	0.0781505	0.0347793	0.0553331	0.0553439	0.0674247	0.0853302	0.0694806	0.0554286	0.0493295	0.0553874	0.0483893	SCIMP
107	1.31452e-90	2.19882e-89	0.0591809	0.0545281	0.055491	0.0460996	0.071939	0.0706782	0.0763319	0.0417835	0.0793819	0.0690219	0.0685667	0.0685209	0.0397488	0.0437416	0.0612844	0.0557574	0.0733577	0.0383117	0.0555778	0.0453169	0.0591809	0.0217436	0.0478837	0.045031	0.0616507	0.0653868	0.0439802	0.0459761	0.0365078	0.0422943	0.0396467	P2RX5
110	1.14041e-82	1.71281e-81	0.0629013	0.0585735	0.0598082	0.0629013	0.0471088	0.0489401	0.0712574	0.0453856	0.0532682	0.0459995	0.0515771	0.0456131	0.0424373	0.0407979	0.0848874	0.0666695	0.0677593	0.0447343	0.0766785	0.0404843	0.0569175	0.0698336	0.0506309	0.0478375	0.0502945	0.0639205	0.0394927	0.0527352	0.0357292	0.0476713	0.0596447	TMEM156
110	1.81642e-180	8.19908e-179	0.177786	0.124331	0.127289	0.0989663	0.124416	0.110299	0.124118	0.0231082	0.0822373	0.129297	0.106532	0.125655	0.103399	0.172398	0.214402	0.155899	0.169329	0.109651	0.182788	0.122141	0.135985	0.218523	0.0526885	0.177786	0.12099	0.104211	0.158334	0.130418	0.0043631	0.163796	0.200138	KMT2E
110	5.27756e-149	1.69539e-147	0.102299	0.099786	0.104501	0.097153	0.062084	0.0699825	0.129808	0.0533794	0.0904694	0.0578495	0.0589692	0.0577461	0.0479517	0.0923132	0.101817	0.110242	0.109724	0.0597329	0.0964555	0.0323597	0.102299	0.0851734	0.0349046	0.0824173	0.0856759	0.115047	0.117098	0.079352	0.0402451	0.0851402	0.0802851	PRKCB
111	5.96857e-157	2.0895e-155	0.095666	0.104444	0.103617	0.0928755	0.128734	0.120565	0.108039	0.0762072	0.101785	0.126256	0.120853	0.124111	0.0481449	0.0928943	0.116757	0.111863	0.108751	0.0693541	0.111041	0.0467958	0.095666	0.0708192	0.06572	0.0788664	0.0817681	0.101523	0.11912	0.0827717	0.0416567	0.0687444	0.0759657	RCSD1
112	3.62189e-128	9.31525e-127	0.128068	0.118104	0.11318	0.0731284	0.106111	0.0864716	0.13867	0.000610304	0.0572044	0.109814	0.106053	0.116719	0.0584512	0.128068	0.111655	0.129003	0.137085	0.076626	0.142555	0.0620521	0.116044	0.0767773	0.0851608	0.117531	0.107154	0.131278	0.217364	0.102836	0.0202508	0.102207	0.109064	SP100
113	2.99775e-108	6.23302e-107	0.0743591	0.0827613	0.0840702	0.0766705	0.0498539	0.0401281	0.0949161	0.0347125	0.0374685	0.0557421	0.0445744	0.0556331	0.0292654	0.0743591	0.0820285	0.0924077	0.108208	0.0220833	0.0765434	0.0435146	0.0726867	0.0253014	0.0546158	0.0637395	0.08901	0.0799098	0.0926533	0.0505335	0.0547328	0.0596548	0.0657142	SPIB
116	1.833e-126	4.59113e-125	0.0917319	0.0816969	0.0707639	0.0378417	0.0528643	0.054503	0.1109	0.0205832	0.0204546	0.0535867	0.0466201	0.0511036	0.0180606	0.0917319	0.0646787	0.0660232	0.0599992	0.0326089	0.0816784	0.01531	0.0812449	0.00385541	0.054464	0.0683007	0.0667757	0.0838384	0.0644385	0.0551372	0.0616041	0.0718494	0.065251	STX7
121	2.545e-126	6.35549e-125	0.135535	0.129999	0.136608	0.0944179	0.104445	0.0809449	0.0739574	0.0433849	0.0659625	0.110659	0.112421	0.11202	0.045495	0.148852	0.164982	0.151721	0.170012	0.102717	0.167217	0.104764	0.129434	0.0706266	0.0921806	0.135535	0.0886953	0.0720127	0.214437	0.120377	0.0346971	0.12987	0.148775	TNRC6B
122	1.74193e-126	4.36629e-125	0.0905114	0.0652524	0.0822149	0.0910218	0.0767366	0.0392547	0.107557	0.0489975	0.0372834	0.106379	0.122977	0.121611	0.0338645	0.092959	0.072412	0.0980598	0.0724975	0.0659642	0.0603695	0.0453498	0.0637378	0.0519578	0.0322967	0.0905114	0.0753492	0.074184	0.0176879	0.047337	0.0521327	0.084475	0.101623	EIF2S3
124	9.66615e-148	3.07574e-146	0.178166	0.162687	0.163071	0.196489	0.167367	0.159393	0.129904	0.156465	0.0996773	0.15115	0.0341413	0.138728	0.146984	0.126261	0.197612	0.17416	0.160918	0.186329	0.205715	0.117953	0.178166	0.269798	0.15613	0.15406	0.160454	0.0875619	0.25203	0.180441	0.0107722	0.14751	0.23242	YPEL5
125	3.01977e-50	2.57178e-49	0.0598271	0.0378517	0.0574456	0.0632668	0.0252787	0.0280551	0.0739691	0.0202314	0.0287897	0.0384693	0.0320408	0.0419184	0.0285093	0.0545479	0.0379209	0.0632793	0.10516	0.0208351	0.0778762	0.0598715	0.0598271	0.00236584	0.0513078	0.0440443	0.0165544	0.0151669	0.169137	0.00635123	0.0225911	0.0370935	0.0704553	ODC1
129	2.93796e-123	7.12461e-122	0.081663	0.0906769	0.0881514	0.0847435	0.0724909	0.072446	0.0939371	0.0605338	0.0882945	0.0722035	0.0753737	0.0726821	0.0505956	0.0681347	0.105666	0.098941	0.131886	0.0716069	0.0856024	0.0568415	0.081663	0.0773294	0.0608757	0.0619091	0.0923839	0.0913643	0.206902	0.0813233	0.026901	0.0616787	0.0776254	IL16
130	9.92226e-111	2.13316e-109	0.0979313	0.0849886	0.0907722	0.0896584	0.0746763	0.0636176	0.0953124	0.0664187	0.0131582	0.0763189	0.0341004	0.0683752	0.0688095	0.101716	0.0895083	0.0995939	0.148143	0.0697672	0.126444	0.0745593	0.0964159	0.0202167	0.05732	0.103312	0.0930627	0.0729106	0.124738	0.0671562	0.0546729	0.0979313	0.109534	PRDM2
130	1.39618e-44	1.06002e-43	0.0647396	0.0647396	0.0618418	0.0222717	0.0509143	0.0292396	0.0459478	0.0320773	0.0316516	0.056581	0.0587621	0.0580596	0.0219172	0.0561753	0.0823003	0.0690485	0.0878893	0.0625635	0.0531145	0.0464591	0.0565195	0.0389329	0.0600822	0.0567581	0.0633322	0.0351207	0.123592	0.0607213	0.0140257	0.0501947	0.0709123	MDM4
132	1.64044e-133	4.46206e-132	0.0986134	0.0996649	0.0986134	0.0890009	0.0847286	0.0736758	0.113536	0.031963	0.0577732	0.0917943	0.0774721	0.0913803	0.0264703	0.0785111	0.084003	0.103604	0.11029	0.0621056	0.0789481	0.00115233	0.0908669	0.0444936	0.0343062	0.0631036	0.0860122	0.103248	0.0674628	0.0724828	0.0247311	0.0642999	0.07382	RGS19
133	3.14703e-94	5.50574e-93	0.0898468	0.0852385	0.0898468	0.0789399	0.0425878	0.0318956	0.031926	0.030775	0.0228943	0.0497042	0.0397179	0.0511292	0.0227958	0.0748955	0.0828501	0.0983901	0.11621	0.0580139	0.0812616	0.0571115	0.0730889	0.0300595	0.0314023	0.0657647	0.0630094	0.0380822	0.0879265	0.0614053	0.0264407	0.0588463	0.0823272	TUT4
140	3.13525e-118	7.24173e-117	0.0630904	0.0746904	0.074592	0.0664468	0.0769375	0.0649498	0.0850982	0.0392892	0.0660715	0.0838903	0.0903809	0.0869036	0.0339145	0.0630904	0.103284	0.0764004	0.0621403	0.0651017	0.0763611	0.0292858	0.071187	0.0236889	0.0431681	0.0584712	0.0707073	0.0717375	0.106281	0.0652111	0.0199807	0.0586892	0.0615491	DCK
140	1.2839e-66	1.4946e-65	0.0680743	0.0458812	0.0400736	0.0293856	0.0403079	0.0350457	0.0680743	0.0268626	0.0405522	0.0357138	0.0062395	0.0152508	0.0196659	0.0399105	0.0502164	0.0523983	0.0592341	0.0276052	0.0491007	0.0295096	0.0349592	0.0113931	0.0371424	0.0299633	0.059659	0.058911	0.124153	0.0376571	0.037026	0.0234922	0.0404075	BLNK
142	4.27322e-199	2.20825e-197	0.161323	0.122486	0.131026	0.107734	0.0655766	0.0359995	0.0717542	0.0257121	0.0719602	0.0852492	0.0966993	0.0931635	0.0484386	0.158306	0.143579	0.161938	0.238401	0.0986396	0.153217	0.0976932	0.129128	0.0683581	0.0950936	0.161323	0.126804	0.0459577	0.188696	0.105083	0.0259187	0.145799	0.172251	SF1
149	2.56012e-69	3.13935e-68	0.0377647	0.0410011	0.0408179	0.0375091	0.04655	0.0400882	0.0415987	0.0239198	0.0312184	0.0469787	0.0478477	0.0463452	0.0227092	0.0338099	0.0363222	0.0428202	0.0438516	0.029835	0.0331006	0.0229889	0.0377647	0.0359629	0.0332547	0.0309063	0.0343519	0.0407457	0.0412546	0.0333282	0.0186774	0.0294389	0.0328593	SHISAL2A
149	3.36072e-120	7.9096e-119	0.0957289	0.0630967	0.0705016	0.066675	0.0374808	0.0287562	0.0632048	0.0121132	0.0118379	0.0495865	0.0359271	0.0486667	0.00964312	0.0910517	0.0815545	0.0750251	0.0895011	0.0473177	0.0934179	0.0119774	0.0715452	0.0410679	0.0463868	0.0957289	0.0551279	0.0581875	0.12596	0.0550188	0.000361629	0.0857212	0.0945119	CHD1
152	9.60264e-95	1.68968e-93	0.0720679	0.0730417	0.0720679	0.0600141	0.074558	0.0727678	0.0773891	0.0546809	0.0676652	0.0736458	0.0641362	0.072377	0.0475613	0.0474088	0.0755532	0.0680219	0.0789784	0.0602002	0.0609761	0.0393169	0.0680831	0.0548346	0.0462593	0.0390895	0.0658433	0.0723746	0.131375	0.0616833	0.0412995	0.0385409	0.0570618	CLECL1
157	1.36011e-87	2.19727e-86	0.0500054	0.0535423	0.0572329	0.0557553	0.0166602	0.0187107	0.0763244	0.0189761	0.0260146	0.0161899	0.0169774	0.0161989	0.0194757	0.0500054	0.048176	0.0624099	0.0692	0.0312346	0.0520083	0.0326699	0.0565975	0.0108549	0.0376859	0.0445678	0.0501728	0.0598911	0.110276	0.0379584	0.0402977	0.0441601	0.0429454	PAX5
158	1.03224e-122	2.49778e-121	0.134183	0.0988947	0.102537	0.107311	0.0688072	0.0416822	0.0557352	0.0142872	0.0450558	0.0849007	0.0761179	0.0869247	0.0208332	0.164765	0.0932045	0.146515	0.179711	0.0676383	0.127428	0.0818534	0.112574	0.0709499	0.0620007	0.134183	0.102285	0.0511921	0.154746	0.0918198	0.00284153	0.135757	0.161878	RSRC2
159	1.58214e-55	1.49512e-54	0.0432573	0.0353211	0.0376361	0.0169775	0.0201911	0.0105965	0.0128769	0.00105616	0.0127859	0.030307	0.0411122	0.0316681	0.00978884	0.0443208	0.0443427	0.0469406	0.072375	0.0337535	0.044137	0.0279116	0.0309032	0.00842475	0.0239323	0.0432573	0.0400244	0.00915654	0.0729784	0.0323496	0.000161008	0.0383334	0.0524518	ZNF644
160	1.75872e-118	4.07066e-117	0.10094	0.0975222	0.10094	0.0948017	0.0466577	0.0648972	0.092908	0.052863	0.0773369	0.042604	0.0625269	0.0577262	0.0340113	0.07613	0.105934	0.111582	0.120547	0.0627365	0.0915512	0.0690929	0.0934414	0.0631816	0.0745665	0.0679454	0.0743772	0.070547	0.114343	0.0773426	0.0220646	0.0632368	0.0856727	PPM1K
165	2.4375e-48	1.99631e-47	0.030166	0.0340739	0.033459	0.0283928	0.0190005	0.0178324	0.0435999	0.00984066	0.0173376	0.0184458	0.0174259	0.0180137	0.00781651	0.021904	0.0293989	0.0375364	0.0760474	0.0260999	0.0295488	0.0120755	0.030166	0.00412062	0.0193014	0.0182482	0.0471844	0.0375815	0.0735535	0.0302713	0.0192869	0.0165852	0.0231026	CD180
169	4.25857e-45	3.26679e-44	0.0427644	0.0373085	0.0423781	0.0394385	0.0167931	0.0137697	0.050674	0.0224562	0.0209739	0.0228557	0.0371413	0.0228501	0.0288662	0.0427644	0.0301486	0.0508079	0.0747224	0.0200749	0.0403293	0.0358066	0.0336909	0.00708632	0.0307419	0.0274128	0.0380683	0.0307397	0.150877	0.0249544	0.0326335	0.0291769	0.0464122	STRBP
176	7.03454e-85	1.10091e-83	0.0642549	0.0642071	0.0642549	0.0582973	0.0351859	0.0236787	0.0358394	0.0250205	0.00879755	0.037384	0.0338318	0.0398999	0.0146506	0.0513723	0.0685208	0.0746884	0.0717029	0.0390466	0.0535253	0.0398598	0.0494519	0.0246594	0.0290077	0.0427706	0.0528827	0.0288436	0.0654036	0.0464729	0.0256026	0.0359105	0.0471981	RIC3
176	2.3005e-73	3.02685e-72	0.0386985	0.0436014	0.0434558	0.042493	0.0376622	0.0352242	0.0535571	0.0204881	0.0265652	0.0381956	0.0323812	0.0375044	0.0195462	0.0386985	0.0543594	0.0509495	0.0848752	0.0332972	0.0448635	0.030453	0.0408812	0.0159183	0.0292926	0.0356951	0.0519836	0.04696	0.0515357	0.0374931	0.0308439	0.0353284	0.0441008	CXCR5
177	4.03883e-73	5.28087e-72	0.0799096	0.0785531	0.0799096	0.0644697	0.0615392	0.0553669	0.0941346	0.0219286	0.0450914	0.0594005	0.0573083	0.0578297	0.0186128	0.0506439	0.0764783	0.096574	0.141505	0.0404826	0.0792415	0.0393579	0.0643445	0.0093041	0.0393607	0.0470598	0.0803518	0.076606	0.130856	0.0516088	0.0437818	0.0356516	0.0403844	FCRL2
178	1.05191e-81	1.56239e-80	0.037856	0.0166253	0.0112442	0.00452456	0.0464982	0.0389893	0.0394824	0.0140731	0.0207512	0.0450296	0.0310588	0.0421126	0.00985121	0.037856	0.0379017	0.0173083	0.0351635	0.00114695	0.0341418	0.0213366	0.0258045	0.00515466	0.0275313	0.0331353	0.0155712	0.029883	0.0364709	0.0160577	0.0157539	0.0319945	0.0258575	MGAT5
182	7.71971e-105	1.55125e-103	0.0830579	0.0925884	0.0927321	0.0903925	0.157462	0.136628	0.0702708	0.0595404	0.0779011	0.165949	0.164769	0.171134	0.0539081	0.0830579	0.102772	0.100375	0.0918334	0.0646819	0.0839862	0.0215058	0.0834796	0.0653436	0.0766356	0.0693057	0.0806398	0.0846083	0.142291	0.074083	0.0666322	0.0762376	0.0914501	DRAM2
186	3.47372e-69	4.24568e-68	0.0353084	0.0383706	0.0389895	0.0358517	0.0233755	0.020057	0.0490371	0.0168807	0.0125674	0.0234635	0.0190871	0.0226745	0.0181863	0.0353084	0.0297851	0.0408621	0.0429124	0.0260463	0.0307965	0.0243349	0.0396964	0.0208035	0.0304739	0.0295801	0.0374273	0.0436797	0.034416	0.031304	0.0294758	0.0307228	0.0287665	FCRL1
187	3.30667e-101	6.37717e-100	0.0868461	0.0879027	0.0868461	0.0730457	0.0480111	0.0610928	0.0998837	0.0460556	0.102759	0.0415891	0.048659	0.0421976	0.0373414	0.0570866	0.0951933	0.0916501	0.121213	0.0676746	0.0791486	0.0087409	0.074488	0.0340612	0.0151685	0.053625	0.0858014	0.0835662	0.0703694	0.0724795	0.00538775	0.0519527	0.063672	AC004687.1
192	1.88955e-71	2.405e-70	0.0341191	0.035607	0.0367699	0.0370338	0.0323665	0.0320525	0.0509823	0.0251436	0.0265847	0.0313459	0.0348249	0.031015	0.0275016	0.0341191	0.0640331	0.0446771	0.0286022	0.0189799	0.0469657	0.00703934	0.0349196	0.0168697	0.0291076	0.0333231	0.0250114	0.0392028	0.011651	0.0229732	0.0331087	0.0336696	0.0291596	RUBCNL
193	1.1418e-107	2.35654e-106	0.0562864	0.0611676	0.0621029	0.0595916	0.0744245	0.0735111	0.0639406	0.0474431	0.0765761	0.0719742	0.0684608	0.071248	0.0366734	0.0597043	0.0605847	0.0603487	0.0664956	0.0505135	0.0547948	0.040054	0.0598041	0.0455285	0.0458518	0.0570244	0.056105	0.0593696	0.0939362	0.0538916	0.0321585	0.0562864	0.050689	RASGRP2
194	3.94177e-63	4.33867e-62	0.0445334	0.0389761	0.0411	0.0445334	0.0323278	0.0298003	0.0429247	0.0221032	0.0213074	0.0323924	0.0248824	0.0312174	0.0215369	0.0389359	0.0381622	0.041768	0.0475727	0.0335701	0.035552	0.02968	0.0398373	0.0224016	0.0282229	0.0360035	0.0424813	0.0410561	0.0195542	0.0339227	0.0126309	0.0364041	0.0436574	GPR18
201	7.13292e-80	1.03381e-78	0.041846	0.0336938	0.0363604	0.0344136	0.0123323	0.0223705	0.041714	0.024359	0.0483034	0.00855895	0.0125979	0.00942899	0.0310278	0.041846	0.032451	0.0341124	0.0396809	0.0144977	0.0306663	0.0294814	0.0377368	0.0130665	0.02713	0.035129	0.0207428	0.0366961	0.0445157	0.0202775	0.0185835	0.0304525	0.0250909	PARP15
202	8.81829e-62	9.46999e-61	0.0416801	0.0418174	0.0423799	0.0360185	0.0582006	0.052526	0.0387009	0.0291038	0.0279095	0.0587017	0.0325018	0.0562725	0.0317587	0.0416801	0.0427349	0.0472437	0.0474172	0.020249	0.043282	0.0280855	0.0353895	0.00563812	0.0307053	0.0347351	0.0362666	0.0355117	0.0377496	0.0252894	0.035338	0.0299912	0.0271953	LINC01857
207	1.33538e-45	1.03527e-44	0.0308653	0.0302253	0.0308653	0.0294219	0.0265848	0.0267109	0.0358945	0.0164644	0.0267088	0.025595	0.027883	0.0270043	0.00233747	0.0223476	0.0257213	0.0337934	0.043546	0.0230372	0.0258748	0.0154632	0.0290644	0.0194351	0.0268945	0.0216734	0.0363101	0.0340262	0.0742821	0.0274793	0.0051774	0.0172756	0.024455	ADAM19
209	4.40963e-63	4.84886e-62	0.0341793	0.0378426	0.0387632	0.0342807	0.0326683	0.029512	0.0446095	0.0171538	0.0241348	0.0320407	0.0282081	0.0313608	0.0169725	0.0341793	0.034439	0.0392761	0.038325	0.0203111	0.0341396	0.0249485	0.036317	0.0055613	0.0253484	0.0309417	0.025524	0.0364342	0.0997528	0.023524	0.027555	0.0292386	0.0248315	FAM129C
218	5.06064e-38	3.26266e-37	0.0277716	0.0295346	0.0281551	0.0252143	0.0349309	0.0366039	0.0222482	0.0150959	0.0293597	0.0349164	0.0363683	0.0359106	0.0179932	0.0172316	0.0264248	0.0324609	0.0485449	0.0271849	0.0245146	0.02281	0.0260404	0.0375244	0.0277716	0.0165732	0.031497	0.0258327	0.0512316	0.025798	0.00578886	0.0163352	0.0257529	PPP3CC
222	1.41015e-42	1.01926e-41	0.0284426	0.0311079	0.0320471	0.0278234	0.00805831	0.010233	0.0334955	0.00561207	0.00729365	0.00860958	0.000922643	0.00696717	0.00615558	0.026599	0.0299512	0.0364484	0.0319661	0.0137195	0.0306774	0.0253092	0.0298305	0.0360168	0.0301196	0.0288	0.0231255	0.02659	0.0361589	0.0199093	0.023887	0.0284426	0.025694	OSBPL10
223	2.95032e-80	4.29274e-79	0.115979	0.0835621	0.0915984	0.0830629	0.0800856	0.0654376	0.0871156	0.0417865	0.046102	0.0984814	0.105081	0.109826	0.0257464	0.0647998	0.105221	0.115979	0.142996	0.0591394	0.0958166	0.0580484	0.0788113	0.0646787	0.0713474	0.0592788	0.0861498	0.0648955	0.147766	0.0542837	0.0520711	0.0482937	0.0850294	SMARCB1
230	5.88265e-61	6.21785e-60	0.0390295	0.0365787	0.0361027	0.0289043	0.0381287	0.0445003	0.0418592	0.0241333	0.0441121	0.0386591	0.0134428	0.0348287	0.026072	0.0366243	0.0415393	0.0381927	0.0463225	0.0232359	0.0426658	0.0214791	0.0383384	0.023782	0.0306342	0.0377077	0.0347061	0.0319059	0.0487123	0.0321498	0.0263375	0.0390295	0.0345047	ANKRD13A
233	9.07566e-53	8.08874e-52	0.0353009	0.0392253	0.0391826	0.0393199	0.0470215	0.0399496	0.039896	0.020058	0.0310823	0.0473961	0.0441723	0.0462996	0.016859	0.0353009	0.0242373	0.0426454	0.0690245	0.0309855	0.0279028	0.0275036	0.0369392	0.0273459	0.0319694	0.0282699	0.0453199	0.040611	0.041251	0.0347205	0.0296946	0.0280056	0.038422	FCER2
235	1.15728e-106	2.36953e-105	0.0806791	0.0468456	0.055402	0.0815427	0.0183592	0.0266931	0.0575701	0.0278187	0.0564017	0.0414503	0.0931651	0.0683402	0.0158548	0.0760467	0.0754818	0.0756288	0.0645428	0.0338073	0.0795854	0.0214275	0.0632213	0.0403436	0.0465778	0.0776682	0.0576871	0.0484981	0.181541	0.027862	0.022895	0.0806791	0.0833598	UBE2N
239	2.49023e-98	4.61422e-97	0.0603552	0.0709171	0.0742814	0.057903	0.0513529	0.0450119	0.0942256	0.0295813	0.0330661	0.0521546	0.044679	0.0507767	0.0299221	0.0707593	0.0675518	0.079794	0.0767376	0.0357646	0.0595274	0.0411155	0.0678353	0.0445515	0.0378132	0.0603552	0.0552014	0.0662017	0.0782546	0.0412961	0.0226052	0.0584769	0.0493125	TRAF5
241	2.10629e-34	1.23801e-33	0.027244	0.020986	0.0226333	0.0145472	0.0175524	0.0123003	0.0360944	0.014427	0.00354757	0.0184296	0.020246	0.0192922	0.0114931	0.024823	0.0286745	0.0286817	0.0270767	0.0121755	0.0255722	0.0220641	0.0211862	0.00840697	0.027244	0.0179885	0.02138	0.0263895	0.0380017	0.0135905	0.0237187	0.0201204	0.018926	TEX9
242	2.88344e-74	3.84054e-73	0.0598898	0.0382975	0.0466587	0.0525054	0.035513	0.031838	0.0306409	0.0185199	0.0485911	0.0525319	0.0680151	0.0612481	0.0148039	0.0598898	0.0298936	0.0616646	0.0835597	0.0361659	0.0492087	0.0376073	0.0318473	0.0150152	0.0246161	0.0519294	0.0562293	0.031419	0.125345	0.031822	0.000829873	0.0452695	0.0575999	KRR1
245	1.88509e-83	2.86852e-82	0.111372	0.0985382	0.101615	0.0497004	0.0794922	0.0598614	0.0764525	0.0547268	0.0526072	0.0894019	0.0761018	0.0870287	0.108657	0.114817	0.107826	0.118275	0.0987385	0.0757279	0.121547	0.0917724	0.111372	0.0848843	0.0580378	0.10798	0.0635463	0.0639717	0.0871136	0.0827235	0.00275306	0.102737	0.161439	GPBP1
245	1.6263e-91	2.76167e-90	0.0477057	0.0436902	0.0404401	0.012366	0.0332837	0.0307229	0.0359482	0.00705851	0.0248256	0.0349864	0.0349899	0.035925	0.0147747	0.0477057	0.0230004	0.0472862	0.0619695	0.0287777	0.0421227	0.017874	0.0436998	0.0301644	0.0371428	0.0415471	0.0418853	0.0398395	0.058837	0.0358194	0.0261271	0.0381982	0.0480196	UVRAG
250	8.31621e-108	1.71954e-106	0.0637571	0.0653252	0.0670275	0.0660285	0.0551969	0.0527473	0.00824896	0.0351457	0.0521573	0.0548364	0.0476637	0.0545514	0.0236026	0.036603	0.0632092	0.0720242	0.0838619	0.0483281	0.0652111	0.0369699	0.0637571	0.0268571	0.0434378	0.0360491	0.0558402	0.0608698	0.115086	0.0497929	0.0104452	0.0389343	0.0559018	BCL2
251	2.97848e-51	2.58788e-50	0.0384342	0.0351311	0.0384342	0.0342518	0.0315566	0.0359269	0.0329838	0.0242286	0.0486312	0.029395	0.0320128	0.0302188	0.0216395	0.0291165	0.0378856	0.0419722	0.0349692	0.0215742	0.0339903	0.0202773	0.033919	0.0134152	0.0277722	0.0295397	0.0246078	0.0197595	0.0134322	0.0211124	0.00448067	0.0199366	0.0257257	NUP210
252	3.89906e-69	4.76207e-68	0.047007	0.0521483	0.0553052	0.0513826	0.0344094	0.0254759	0.0648588	0.0246054	0.0255	0.0508036	0.0533342	0.055386	0.0165884	0.047007	0.0789049	0.0688043	0.0632735	0.0329162	0.0613484	0.0357841	0.0444949	0.0290077	0.0315201	0.0407299	0.0464114	0.0479024	0.0916909	0.0339058	0.021954	0.0363333	0.0458771	METTL8
252	1.66458e-99	3.13457e-98	0.0606302	0.0647129	0.0628206	0.0565539	0.0316535	0.0298798	0.0712598	0.00117002	0.0419967	0.032358	0.0320818	0.0327357	0.0310512	0.0455937	0.0752924	0.0667453	0.0607126	0.0429389	0.0573402	0.0219501	0.0606302	0.0764628	0.001881	0.034948	0.0464854	0.0661523	0.0527499	0.0539894	0.036974	0.0364877	0.048368	CYSLTR1
259	6.25376e-67	7.32072e-66	0.0561292	0.0675185	0.0662673	0.0595557	0.0536811	0.0428176	0.0717531	0.0282516	0.0312427	0.062532	0.0607814	0.06439	0.017204	0.0561292	0.0616299	0.0748533	0.106936	0.050374	0.0608681	0.0381009	0.0568785	0.0431461	0.0437152	0.045978	0.0758731	0.0630339	0.0796192	0.0533208	0.0338737	0.0454476	0.0532494	QRSL1
259	2.55082e-89	4.20183e-88	0.0598774	0.0422907	0.0444548	0.0170284	0.015138	0.0151522	0.0372901	0.00406782	0.021972	0.0212514	0.024524	0.0173604	0.0014518	0.0598774	0.0436461	0.0555969	0.0963838	0.0350166	0.0430148	0.0215844	0.0368857	0.029201	0.027092	0.0486517	0.0397505	0.0312251	0.108998	0.0429911	0.00782517	0.0455689	0.0599272	NEMF
259	1.56717e-100	3.00341e-99	0.0832704	0.0588627	0.0628528	0.0459892	0.0673754	0.0592525	0.0513676	0.0428566	0.0434309	0.0709884	0.0529015	0.0652547	0.023591	0.0830433	0.0901199	0.0855295	0.100627	0.0526077	0.0791279	0.0400819	0.0514622	0.023983	0.0305167	0.0832704	0.0488466	0.0336088	0.0772619	0.0437469	0.0143827	0.0800089	0.0905872	RNMT
263	1.3105e-76	1.81542e-75	0.0966138	0.0493497	0.0662641	0.0844834	0.00126227	0.0183848	0.0569464	0.0189151	0.0580857	0.0570922	0.125706	0.0944294	0.0103286	0.0877149	0.0841433	0.0994703	0.0821251	0.0269157	0.0987331	0.0239867	0.0615106	0.0342976	0.0252082	0.0711275	0.0515532	0.0526163	0.0758953	0.0214082	0.017137	0.0654744	0.0966138	UBE2I
264	3.3954e-88	5.53059e-87	0.0805978	0.0496937	0.0439832	0.0363199	0.104745	0.0842124	0.0892568	0.0852912	0.0774825	0.121417	0.00875662	0.115255	0.1098	0.0805978	0.108372	0.0662307	0.0501166	0.0340978	0.0886514	0.0489411	0.0569836	0.13234	0.0720422	0.0646689	0.0467019	0.0748	0.0883316	0.0535896	0.0321202	0.0660127	0.0946659	PMAIP1
265	1.16229e-52	1.03425e-51	0.0389364	0.0403393	0.0389364	0.0332531	0.0277329	0.0282358	0.0412531	0.0167475	0.0297556	0.0274968	0.0197739	0.0272852	0.013244	0.0327683	0.0461553	0.0445152	0.0754993	0.0278638	0.0359947	0.0270417	0.0316954	0.0174495	0.0244832	0.026784	0.041589	0.0364296	0.0428393	0.029961	0.00716163	0.0239086	0.0301784	NCR3
266	7.74971e-79	1.10506e-77	0.0628369	0.0545211	0.054817	0.0557917	0.0378016	0.0380734	0.0585434	0.036817	0.0433488	0.0442887	0.0524366	0.0477776	0.0465034	0.0530281	0.0543219	0.0612724	0.0562221	0.0302699	0.0745783	0.012927	0.0628369	0.0120127	0.0427179	0.0477177	0.0408602	0.049091	0.039752	0.0387144	0.0249083	0.0425404	0.0531671	PTPN1
270	7.63839e-71	9.63793e-70	0.0469297	0.0509557	0.0533119	0.0439362	0.0279142	0.0278423	0.0551414	0.00250614	0.0355844	0.0279611	0.0223959	0.0277974	0.0118908	0.0408962	0.0383686	0.0593252	0.066874	0.0265655	0.0466369	0.0208786	0.0469297	0.0298408	0.0321424	0.0309154	0.0359017	0.0509083	0.0536406	0.0360165	0.0283645	0.0291265	0.0350011	FCHSD2
276	6.91937e-84	1.0645e-82	0.0754474	0.0747967	0.0798881	0.0936568	0.0270995	0.0252232	0.0749383	0.0367311	0.0231074	0.0303162	0.0255535	0.0304923	0.0561529	0.0820161	0.092084	0.0921578	0.104415	0.0625512	0.0858679	0.014442	0.0754474	0.0627676	0.00361456	0.0771831	0.0749487	0.0709866	0.0976562	0.0664157	0.0446395	0.0724565	0.0919105	NFKBID
277	3.03401e-66	3.50757e-65	0.0487876	0.0561347	0.0567749	0.0462755	0.0422899	0.0321325	0.05351	0.0229307	0.0217237	0.0542485	0.052758	0.0562921	0.0141481	0.0487876	0.0506167	0.0670747	0.0575593	0.0349755	0.0493533	0.0237011	0.0450464	0.0274364	0.0395801	0.0414468	0.0519259	0.048765	0.0590199	0.0397464	0.0275834	0.0398595	0.0469388	CYB561A3
278	3.47486e-81	5.13391e-80	0.0567439	0.0638113	0.0610103	0.0528511	0.0636522	0.0440137	0.0727379	0.0336125	0.0354206	0.0703967	0.0698269	0.0707331	0.0267691	0.0567439	0.057045	0.0653326	0.0767576	0.0467026	0.0602808	0.0304512	0.0563503	0.0558202	0.0449052	0.0477214	0.0636512	0.0424337	0.0583354	0.0514626	0.0252911	0.0443642	0.0564616	GGA2
286	3.18858e-37	2.01619e-36	0.028401	0.0305447	0.0310806	0.0252796	0.012715	0.00989344	0.0324894	0.00777325	0.0169657	0.0124144	0.01494	0.0133284	0.00805554	0.0268139	0.0331137	0.0395519	0.0806545	0.0222808	0.0296062	0.0137042	0.028401	0.0573143	0.00246656	0.0220736	0.0346719	0.0273786	0.10057	0.0304097	0.0189836	0.0201383	0.0226828	CBFA2T3
295	2.13851e-82	3.19329e-81	0.0421544	0.0510899	0.0524082	0.0521634	0.0480454	0.0428277	0.0566448	0.027436	0.0251299	0.0497294	0.0348378	0.0483668	0.0238543	0.0421544	0.0611435	0.0568796	0.054719	0.0329816	0.0547287	0.0318871	0.0487883	0.0286837	0.0283589	0.0365725	0.0396208	0.049527	0.0357659	0.0384045	0.00163107	0.0346752	0.0467437	P2RY10
297	2.70802e-35	1.62879e-34	0.0334944	0.0300833	0.0278857	0.0190453	0.0578604	0.047771	0.0374417	0.0142076	0.044175	0.0592967	0.0544974	0.0592011	0.0255105	0.0263458	0.0517033	0.0291549	0.0295938	0.0197467	0.0464712	0.0278425	0.0334944	0.00326888	0.0328505	0.0277045	0.0320846	0.0320701	0.122797	0.0281695	0.0113097	0.0256408	0.0296226	ERAP2
298	3.81629e-73	4.99184e-72	0.0725543	0.0775944	0.0755834	0.0376294	0.0492277	0.036633	0.0877337	0.0279233	0.0307306	0.0582937	0.0581267	0.0628165	0.0267616	0.0686868	0.0781806	0.0868564	0.126697	0.0533466	0.0784673	0.044819	0.0725543	0.0403384	0.04177	0.0552255	0.0748875	0.0777537	0.109711	0.0646185	0.0406533	0.0519275	0.0777362	MBD4
299	2.73949e-29	1.39971e-28	0.0209131	0.025143	0.0237304	0.018216	0.0261265	0.0231981	0.0218386	0.0198556	0.0132616	0.0261787	0.0180694	0.0223885	0.0160906	0.0137884	0.0368467	0.0240903	0.0260234	0.0211106	0.0259146	0.0165173	0.0224715	0.00168722	0.0209131	0.0115855	0.0215306	0.00593166	0.0300079	0.0208422	0.0128667	0.00994509	0.0231035	RUBCN
299	1.6998e-61	1.81496e-60	0.0530787	0.0530422	0.0549555	0.0443801	0.025522	0.0208429	0.0739856	0.0206921	0.0188836	0.0252606	0.024678	0.0251717	0.0314355	0.0456557	0.0640966	0.0587709	0.0863181	0.0356068	0.0577918	0.0163051	0.0530787	0.0259049	0.0144916	0.0471401	0.0503569	0.0581157	0.0556644	0.0419559	0.034517	0.0433113	0.0464487	MAP3K1
302	5.35808e-81	7.89193e-80	0.0463693	0.0399858	0.0424277	0.0410436	0.0203254	0.0252234	0.0371273	0.0183982	0.0510991	0.0201205	0.0300775	0.0206206	0.0244439	0.0463693	0.0275092	0.0430254	0.0478447	0.0290486	0.0311808	0.0256352	0.042881	0.0142098	0.0153262	0.0382869	0.0345607	0.0327858	0.104044	0.0262786	0.00575229	0.0382722	0.0338231	CDKN2D
304	1.30019e-70	1.63074e-69	0.0618887	0.0639902	0.0636209	0.04328	0.0481214	0.038524	0.0548516	0.0148034	0.0406176	0.0491797	0.0511972	0.0467743	0.0291016	0.0468713	0.0734536	0.0753686	0.107528	0.0420157	0.0754817	0.0421538	0.0618887	0.0184159	0.0490428	0.0413302	0.0556534	0.0356042	0.120245	0.0520089	0.0132161	0.0451859	0.0553064	ZNF791
306	5.1912e-41	3.61659e-40	0.0276148	0.0309547	0.0301659	0.0299348	0.0305188	0.0268309	0.0279262	0.0221978	0.0265086	0.0299274	0.0313691	0.0296737	0.0155335	0.00565793	0.0420444	0.0337991	0.0220142	0.0221545	0.0269475	0.0240511	0.0276148	0.0641717	0.0280412	0.00686327	0.0244385	0.0309454	0.0100257	0.0288464	0.0187119	0.00304621	0.0295339	PNOC
310	1.36332e-79	1.96743e-78	0.049025	0.0386535	0.0420079	0.0434816	0.0485729	0.0398353	0.0388362	0.0289409	0.0492772	0.0504019	0.05032	0.049455	0.0328134	0.049025	0.051926	0.0451567	0.0522544	0.0271855	0.0479112	0.0359674	0.0395977	0.0258587	0.0277002	0.0455869	0.0252494	0.0222241	0.0812165	0.0278695	0.000501917	0.0449775	0.0214316	RBM38
311	1.45145e-79	2.0919e-78	0.0470925	0.0377555	0.0409859	0.0316271	0.0486098	0.0382993	0.0437689	0.011775	0.0251876	0.0546265	0.0605737	0.0558844	0.00926169	0.0470925	0.0478783	0.044455	0.0468275	0.0259854	0.0416065	0.00778907	0.0428613	0.0164617	0.0244525	0.0387497	0.0388654	0.0319675	0.0567149	0.0376071	0.0287744	0.0384611	0.0362421	WASHC4
319	2.25232e-33	1.29104e-32	0.0228334	0.0248047	0.0251299	0.0208533	0.0106354	0.0089131	0.0249279	0.0061852	0.00551508	0.0105039	0.0109205	0.010079	0.00195562	0.0170386	0.0181383	0.0300123	0.038601	0.0144064	0.0230293	0.0120547	0.0228334	0.0103461	0.0174845	0.0115855	0.0277284	0.0272559	0.0778301	0.0196092	0.0136384	0.0106284	0.0127386	COL4A4
319	3.03534e-71	3.8502e-70	0.0418122	0.0456712	0.0452844	0.0387555	0.0374575	0.0379078	0.0524338	0.0254702	0.0401393	0.0357565	0.0314228	0.0351258	0.0227977	0.0331305	0.0513038	0.0489738	0.0548454	0.0330668	0.0375664	0.014628	0.0418122	0.0364041	0.0265946	0.0308311	0.0458853	0.0478801	0.041277	0.0380511	0.00100331	0.0291215	0.0347332	SASH3
322	1.10277e-74	1.4788e-73	0.0861145	0.048599	0.0593975	0.0215249	0.0363772	0.0281887	0.0861145	0.0122297	0.0180264	0.0476272	0.0459849	0.0483844	0.0408975	0.0551447	0.0577971	0.0687776	0.123435	0.0369226	0.069287	0.00828043	0.0544123	0.0183068	0.0400779	0.0535614	0.057312	0.0698463	0.0934339	0.0442487	0.0314413	0.051164	0.0680775	MIS18BP1
324	3.19489e-47	2.5677e-46	0.029318	0.0307621	0.0305559	0.0312112	0.0578034	0.0476917	0.0328458	0.0152717	0.0279356	0.0573458	0.0477074	0.0550895	0.0129868	0.029318	0.0246562	0.0331338	0.0440025	0.0174447	0.0269273	0.0114847	0.0293334	0.00258725	0.0220577	0.0241003	0.0267361	0.0258573	0.0207595	0.0204403	0.0228551	0.0235145	0.0239844	CD72
332	2.45305e-76	3.38283e-75	0.0590707	0.0603598	0.0590707	0.0524345	0.0639336	0.0536928	0.0489126	0.0142756	0.043603	0.065979	0.0655813	0.0651945	0.0255129	0.0375114	0.0594402	0.059027	0.0535731	0.0484412	0.048238	0.0269164	0.0547169	0.0641884	0.0346962	0.0386132	0.0420442	0.0542574	0.0738487	0.0515314	0.00114687	0.0365336	0.0536898	PSMB8-AS1
334	1.17318e-76	1.62588e-75	0.0483567	0.0295792	0.0274861	0.0101751	0.0237626	0.0174579	0.0227594	0.00141828	0.0299559	0.0260501	0.0317502	0.0306249	0.0193075	0.0483567	0.03068	0.0346323	0.0478028	0.023071	0.0472434	0.0288537	0.0358921	0.00955594	0.0286696	0.0462676	0.0371123	0.0239201	0.0265902	0.0347287	0.00380533	0.0422728	0.0393494	ELMSAN1
335	6.08032e-32	3.35122e-31	0.0229258	0.015944	0.0162556	0.0144062	0.0258903	0.0247561	0.0131731	0.0278716	0.0188054	0.0251776	0.0230386	0.0258231	0.039654	0.0229258	0.0160426	0.0165661	0.0105345	0.00510548	0.0165682	0.0202402	0.0173758	0.0119769	0.0224729	0.0138176	0.0057947	0.0146171	0.00908658	0.00848559	0.0194542	0.0170341	0.0118229	CD70
336	1.59485e-41	1.12299e-40	0.0252902	0.0259759	0.0257949	0.0196837	0.0429421	0.0381945	0.0309789	0.0165775	0.0277509	0.0428938	0.0313347	0.0415106	0.0132093	0.0222333	0.0260312	0.0273123	0.0237274	0.0128582	0.0229193	0.0192262	0.0252902	0.0155813	0.0196418	0.0177424	0.0197011	0.0278879	0.0211934	0.0182694	0.0171831	0.0181468	0.0137438	CNR2
341	2.80995e-50	2.39431e-49	0.0369549	0.0355411	0.0344441	0.0257748	0.0534366	0.0439484	0.0252693	0.0297085	0.0268366	0.053772	0.0494543	0.0521355	0.0278219	0.0369549	0.0551631	0.0411327	0.0262255	0.0231098	0.0406055	0.0281798	0.0291708	0.0545228	0.0229415	0.0334435	0.0155089	0.0234346	0.0188771	0.0298862	0.0205147	0.0301619	0.0284565	SIDT1
344	9.54618e-82	1.42041e-80	0.0496926	0.051462	0.0519594	0.0462539	0.0291508	0.0309639	0.0620261	0.0263436	0.041673	0.0292313	0.0231104	0.0293361	0.0356147	0.0452312	0.0634515	0.0557456	0.0650872	0.0373431	0.0516297	0.0268847	0.0496926	0.036912	0.00738062	0.0399847	0.0524796	0.0560822	0.078886	0.0458692	0.00839627	0.0382939	0.041774	ARHGAP25
347	1.18345e-45	9.18978e-45	0.026347	0.0296031	0.029002	0.00575051	0.0176629	0.0143472	0.015335	0.00238511	0.00376035	0.0182454	0.023024	0.0195646	0.00827523	0.026347	0.0251079	0.0324131	0.053534	0.0203945	0.0296211	0.0154294	0.0261922	0.00879653	0.0155886	0.0232627	0.0331354	0.0165537	0.00104686	0.0273747	0.00332176	0.0194644	0.0233974	ZNF75A
350	7.4558e-47	5.9508e-46	0.0339799	0.0413365	0.0426614	0.0363813	0.0162508	0.0150745	0.0479658	0.00984763	0.00720269	0.0178592	0.00994252	0.0173763	0.008915	0.0339799	0.0401306	0.0527889	0.0813885	0.0260566	0.0421644	0.0212796	0.0330058	0.000941094	0.0226208	0.02741	0.046241	0.0400234	0.0624554	0.0309852	0.0172858	0.0227909	0.0274427	FCRL3
350	7.98493e-30	4.15063e-29	0.0244274	0.0312764	0.0278947	0.00152529	0.0155885	0.00796081	0.0188226	0.0136339	0.0081119	0.0209607	0.0256002	0.0233201	0.0100482	0.0275369	0.021234	0.0359679	0.0465197	0.0197286	0.0214972	0.0207964	0.0244274	0.00500616	0.0164052	0.0233016	0.0202364	0.0176917	0.0436868	0.0192077	0.00668572	0.0206381	0.0297392	ITFG2
356	2.14451e-36	1.33042e-35	0.0257406	0.0246797	0.0246904	0.0206301	0.0152229	0.0130233	0.0395937	0.00745189	0.0076419	0.0162872	0.0103228	0.0158619	0.00823513	0.0168052	0.0244161	0.0281889	0.0499787	0.0154279	0.025154	0.0147822	0.0257406	0.00118071	0.0167925	0.0135423	0.0323256	0.0316358	0.0440433	0.0215748	0.0164938	0.0150555	0.0161532	CR2
365	6.32449e-73	8.25012e-72	0.055521	0.0319797	0.0389435	0.0472719	0.0373145	0.0276841	0.030633	0.0199524	0.0687125	0.0527975	0.0517361	0.0585133	0.014924	0.055521	0.0533484	0.0511263	0.0560899	0.0185776	0.0461197	0.0191029	0.0357895	0.0565517	0.0352215	0.046911	0.0279131	0.032625	0.0596921	0.0252347	0.000682452	0.0448712	0.0488363	SNHG15
369	7.33901e-42	5.20262e-41	0.0248596	0.0227861	0.0236396	0.0146099	0.0150478	0.0101966	0.015662	0.00227701	0.0112676	0.016119	0.0133659	0.0158468	0.00241971	0.0223074	0.0219513	0.0278427	0.0526863	0.0183943	0.0259333	0.011138	0.0232314	0.000905153	0.0100263	0.0248596	0.0281567	0.0117635	0.0723639	0.0197623	0.00157101	0.0237024	0.0271488	FAM13B
370	1.57062e-48	1.29233e-47	0.0324183	0.0323875	0.0324183	0.0263783	0.0315656	0.0341682	0.037685	0.0099466	0.0440884	0.0295455	0.0310837	0.0297491	0.0136736	0.0248947	0.0245514	0.0333743	0.0384084	0.0197502	0.0223883	0.0216647	0.0294114	0.0131237	0.0230479	0.0214535	0.0261476	0.0330535	0.0406093	0.021047	0.0162237	0.0202343	0.0211056	GRAP
374	1.34494e-31	7.35475e-31	0.0179135	0.021096	0.0194505	0.0186442	0.00866746	0.00814451	0.0201218	0.0133098	0.0100296	0.00939934	0.0112481	0.00979899	0.0107383	0.017053	0.0193592	0.0221334	0.0313355	0.0197316	0.0169884	0.0139182	0.0179135	0.0197329	0.0162107	0.0117666	0.0212006	0.0183996	0.0661858	0.0190151	0.00262607	0.0123185	0.0168192	PCED1B
383	2.19967e-37	1.39588e-36	0.0267577	0.0273229	0.0270474	0.0270219	0.0246771	0.0245368	0.0291237	0.0144092	0.0288474	0.023537	0.027674	0.0235484	0.0110679	0.0237117	0.0236339	0.030123	0.0246153	0.0155815	0.0200104	0.0177675	0.0267577	0.049339	0.0241143	0.019919	0.0171001	0.0296865	0.0113123	0.0205429	0.0164655	0.0197739	0.0224164	SNX22
386	1.91066e-49	1.59879e-48	0.020526	0.0212807	0.0224589	0.0194508	0.00752816	0.00925827	0.0310017	0.0068905	0.0117619	0.00674598	0.00613037	0.00662361	0.0106158	0.020526	0.0119524	0.0236956	0.023866	0.011643	0.0207267	0.00290604	0.0230658	0.00215579	0.0132186	0.0173238	0.0209934	0.0257441	0.0205908	0.0159207	0.0182662	0.0187172	0.0127623	WDFY4
387	1.27688e-71	1.63139e-70	0.0446103	0.0432227	0.0432429	0.038379	0.0295691	0.0280209	0.0509793	0.0183209	0.0186401	0.0253113	0.0260258	0.0173519	0.027175	0.0379956	0.048904	0.0463887	0.0553026	0.0333214	0.0455627	0.0142077	0.0446103	0.0401549	0.0277325	0.0315599	0.0548673	0.0217283	0.0522984	0.0321961	0.00440554	0.0312447	0.0408995	LRMP
391	8.29155e-63	9.07283e-62	0.0589405	0.0586865	0.0583378	0.00672805	0.0350324	0.0206004	0.0566649	0.0124672	0.0176242	0.0466703	0.0285011	0.0459691	0.0173147	0.063414	0.0780671	0.0804373	0.0811578	0.0337911	0.0707193	0.0359665	0.0569922	0.0291537	0.0251871	0.0589405	0.0307871	0.0421747	0.0691111	0.042834	0.00611201	0.0579248	0.073366	FNBP4
393	1.36263e-40	9.40324e-40	0.035332	0.0251802	0.0265721	0.0218237	0.0115002	0.0160144	0.0412108	0.00830891	0.0251471	0.0094178	0.0110128	0.00941683	0.00868966	0.022549	0.011639	0.0272635	0.0486319	0.0174911	0.018981	0.00554655	0.0286216	0.00125032	0.0194382	0.0185558	0.035363	0.035332	0.0413865	0.0229808	0.0185103	0.0207263	0.0157374	CR1
393	1.31821e-88	2.15554e-87	0.0699205	0.0502498	0.0480615	0.0747462	0.0709874	0.066592	0.0752856	0.0285788	0.0487686	0.081237	0.0912668	0.0842279	0.0192086	0.0834796	0.0465894	0.068587	0.113154	0.0523709	0.0809512	0.00823244	0.0557515	0.0721617	0.0369644	0.0699205	0.0787832	0.066799	0.0808904	0.058749	0.0480057	0.0682743	0.084731	SNX2
403	2.97736e-68	3.55988e-67	0.0422154	0.0308647	0.0246269	0.00775491	0.0102357	0.00354912	0.0376869	0.00145893	0.00572978	0.0137209	0.00724459	0.0113597	0.00922179	0.0422154	0.0398696	0.0321599	0.0581437	0.0229586	0.0389806	0.0176531	0.0308833	0.0326255	0.0155895	0.0359658	0.0314155	0.0306705	0.0534389	0.0270937	0.00778245	0.0313507	0.0366292	MORC3
404	1.31381e-64	1.48309e-63	0.0690126	0.0318086	0.0426679	0.038622	0.0221444	0.0120582	0.0328636	0.00188303	0.0530803	0.0620281	0.0858656	0.0775059	0.00956537	0.0759922	0.0866869	0.069011	0.0748313	0.032179	0.0777098	0.0420152	0.042079	0.0495154	0.0239652	0.0690126	0.0354165	0.00743629	0.060638	0.017347	0.00185636	0.0674486	0.077531	RNPS1
417	4.55406e-69	5.5459e-68	0.0569372	0.0384205	0.0441065	0.0107101	0.0157869	0.00558542	0.00279019	0.0118351	0.0117619	0.0218643	0.0181772	0.0239972	0.014464	0.0659674	0.0527047	0.0477056	0.0654281	0.0300528	0.0512207	0.0374508	0.0376902	0.00450732	0.0294256	0.0549247	0.03904	0.00629702	0.0698494	0.0415995	0.0091264	0.0569372	0.0634537	PHF3
419	3.00108e-66	3.47069e-65	0.0451795	0.0365677	0.0382976	0.0162078	0.0124404	0.00842032	0.0154125	0.0183519	0.0169157	0.014455	0.00928911	0.0132481	0.0364422	0.0451795	0.0432107	0.0486579	0.04775	0.023946	0.0466618	0.0314147	0.0401742	0.0407215	0.0222039	0.0428729	0.0187214	0.00738522	0.0639921	0.0305627	0.0258477	0.039492	0.0380639	CHD7
424	1.97311e-45	1.52194e-44	0.0360049	0.0205081	0.0246917	0.0336224	0.00386084	0.0107783	0.0154157	0.0132569	0.0172079	0.00599644	0.00895595	0.00729111	0.0171971	0.0300304	0.029315	0.0302196	0.0149264	0.0291024	0.0329842	0.0273284	0.0243312	0.0166064	0.0214053	0.0360049	0.0164188	0.0130432	0.00201952	0.0166873	0.00586848	0.0333449	0.0386754	AP3M2
429	2.89254e-57	2.82663e-56	0.0737013	0.0457529	0.0454098	0.0470919	0.0378051	0.0269909	0.00808422	0.0182853	0.0120306	0.0412647	0.044156	0.0400867	0.03039	0.0505046	0.0847186	0.0669655	0.0522927	0.0371517	0.0692288	0.0310456	0.0419936	0.113538	0.0359856	0.0581775	0.037887	0.0188989	0.0338507	0.0468018	0.00560624	0.0513906	0.0737013	RBM23
432	1.92192e-35	1.16035e-34	0.0184058	0.0155801	0.0178625	0.0188135	0.00787009	0.011672	0.0210549	0.00939735	0.0125263	0.00752041	0.00802536	0.00769559	0.0121055	0.0158493	0.0126041	0.0158752	0.00612718	0.0116612	0.018395	0.0111071	0.019283	0.0139562	0.0130944	0.0184058	0.00772138	0.0188467	0.0234434	0.0136966	0.000931292	0.0179255	0.0142276	ZC3H12D
434	2.17314e-34	1.27641e-33	0.0158606	0.0131319	0.0142118	0.0148619	0.0112351	0.0108775	0.0169958	0.012147	0.00952971	0.0111033	0.00956375	0.0107603	0.0123455	0.0136308	0.0185003	0.0148129	0.0190415	0.0121648	0.0156635	0.0116192	0.0154676	0.0129393	0.0129518	0.0154296	0.0171661	0.0167334	0.0171274	0.0126948	0.0137888	0.0158606	0.0154988	LINC01215
435	6.85232e-56	6.51398e-55	0.0397038	0.0427544	0.0423218	0.0347173	0.0366057	0.0219556	0.0241743	0.0150481	0.0176709	0.0378188	0.0284699	0.037274	0.0145288	0.0376092	0.0298316	0.0436331	0.0491824	0.0325265	0.0388002	0.0303465	0.0397038	0.0298059	0.0244797	0.0305684	0.0311029	0.0237751	0.058378	0.0378807	0.00331243	0.0238229	0.0426408	PHF1
437	8.69997e-45	6.63136e-44	0.039105	0.0360536	0.0357243	0.0154177	0.0305087	0.0260711	0.0388975	0.0113387	0.0237402	0.0296396	0.0320468	0.0308637	0.0170841	0.0404437	0.0370686	0.0379216	0.0411482	0.0182466	0.0399494	0.0251134	0.0349175	0.0154889	0.0202674	0.0287849	0.0278123	0.039105	0.0846293	0.0262029	0.00707006	0.0279428	0.0386234	SP140L
440	1.93608e-59	1.98387e-58	0.042668	0.0185685	0.027211	0.0318863	0.028855	0.0255926	0.0337036	0.00355705	0.0136006	0.0396723	0.0378575	0.0396554	0.0170577	0.0335007	0.0362395	0.0296961	0.0535052	0.0264018	0.0428528	0.00868598	0.0236212	0.0116676	0.0275076	0.042668	0.0322576	0.0264081	0.117657	0.0205044	0.0269093	0.0412714	0.0335281	TCOF1
452	1.01893e-67	1.20752e-66	0.0386415	0.0349857	0.0363826	0.034258	0.0269794	0.0286134	0.0452455	0.0285228	0.0363334	0.0261354	0.0228619	0.0259144	0.0357139	0.0188825	0.0360319	0.0365551	0.048783	0.0240822	0.0369248	0.0106268	0.0386415	0.00330995	0.00718739	0.0111154	0.0374046	0.039724	0.0322874	0.0276582	0.0227127	0.00128566	0.0324858	KLHL6
460	1.0637e-50	9.15669e-50	0.0364789	0.0388698	0.0378609	0.042789	0.0661429	0.0539894	0.0267824	0.0304683	0.0166861	0.0659602	0.0634277	0.0651515	0.0315474	0.0322457	0.0558877	0.0394317	0.0868946	0.0499405	0.0500355	2.24534e-05	0.034969	0.00823745	0.022036	0.0364789	0.0628451	0.0440881	0.126704	0.0459638	0.00533132	0.0320078	0.0434064	CMTM7
464	1.225e-34	7.23183e-34	0.0323295	0.0342251	0.0323295	0.0266956	0.0207706	0.00902132	0.0224172	0.018631	0.00733536	0.0235881	0.0304581	0.0226129	0.0139758	0.0243357	0.0494311	0.0357389	0.027396	0.0322799	0.0325085	0.0226259	0.0267649	0.00665953	0.0166843	0.0251692	0.0295644	0.0147096	0.0280322	0.0305439	0.00490607	0.0251531	0.0288241	FAM215B
467	2.1479e-68	2.57456e-67	0.0715694	0.0717531	0.0715694	0.063377	0.0657097	0.0546199	0.0641906	0.0386219	0.0429788	0.0633101	0.0715266	0.0654306	0.0455162	0.0666944	0.045184	0.0718272	0.0501595	0.0468086	0.0583599	0.0449055	0.055918	0.0091351	0.0170962	0.0547235	0.0496541	0.0453983	0.00672258	0.0392397	0.0449618	0.0531934	0.0591507	PLEKHF2
474	1.26379e-60	1.32743e-59	0.0508284	0.0180506	0.0200593	0.0275151	0.045033	0.0392743	0.0298803	0.0139469	0.0183163	0.0465107	0.0438372	0.0417533	0.0530188	0.0508284	0.0223049	0.0255202	0.0376029	0.0160884	0.0474544	0.0341449	0.0281236	0.000790122	0.0104861	0.0442986	0.0188499	0.0100431	0.0245654	0.0184382	0.0290749	0.0440446	0.0435566	ZCCHC10
482	3.40938e-67	4.00223e-66	0.0506181	0.0471037	0.0510062	0.0488948	0.0177829	0.0205049	0.0306161	0.00956229	0.0171204	0.0274095	0.0373286	0.0345904	0.0129737	0.0613071	0.0577118	0.05828	0.059682	0.0308784	0.0437639	0.0289108	0.0470982	0.0264449	0.034726	0.0506181	0.0333959	0.0339852	0.0848781	0.0315639	0.0140478	0.0482991	0.0594979	CDC40
489	5.46981e-45	4.18923e-44	0.045904	0.0463613	0.0495094	0.0328335	0.0257591	0.0171343	0.0429835	0.00334957	0.0171666	0.0290698	0.0148945	0.0272138	0.0139523	0.045904	0.0512641	0.0488162	0.044292	0.0246809	0.0495842	0.0355384	0.0376119	0.00776508	0.0204477	0.0409578	0.0213754	0.0225384	0.0598411	0.0249737	0.000568011	0.0392427	0.0516973	TLK1
492	1.17583e-30	6.27048e-30	0.0176332	0.01899	0.0185383	0.0182346	0.0351991	0.0314723	0.016607	0.0156597	0.0325076	0.0350239	0.0416507	0.0350472	0.0101843	0.012159	0.00913104	0.0167239	0.0191025	0.0210167	0.0122683	0.0149605	0.0176332	0.0150091	0.0147371	0.0106588	0.02007	0.0185989	0.0355608	0.0186873	0.00894724	0.0108972	0.0162346	BTLA
495	1.13718e-20	4.41726e-20	0.0217826	0.0170604	0.0210351	0.0236457	0.0270723	0.0224697	0.0146145	0.00236459	0.0111763	0.0292955	0.0284054	0.0312259	0.0107549	0.0188601	0.0307511	0.0183945	0.0284087	0.0107572	0.0226277	0.016365	0.0217826	0.0225063	0.0210819	0.011711	0.0153372	0.0120778	0.010894	0.0191462	0.0108469	0.0150152	0.0274379	CCDC32
498	2.79752e-39	1.86416e-38	0.0244753	0.025249	0.0258577	0.0189276	0.00746599	0.0114614	0.0327246	0.00746791	0.022367	0.00523381	0.00764769	0.00528027	0.00494863	0.0221562	0.0159202	0.0262787	0.0278693	0.011503	0.0224374	0.00700995	0.0244753	0.00227079	0.0147855	0.0164736	0.0185333	0.0272529	0.03137	0.0164967	0.0149903	0.0142239	0.0124733	TLR6
499	4.24552e-24	1.85471e-23	0.0133244	0.0132656	0.0130542	0.0117764	0.0139244	0.0103634	0.0143171	0.00741404	0.0082604	0.0146667	0.0112387	0.0137761	0.0102938	0.0133244	0.0075839	0.0164125	0.024457	0.0136898	0.00978722	0.0138041	0.0124447	0.0053054	0.0108176	0.00948967	0.0172125	0.00952097	0.0246159	0.0132044	0.00450688	0.00919572	0.0167185	VCPKMT
500	2.43344e-59	2.48364e-58	0.0531361	0.0241993	0.0267061	0.0337715	0.0278132	0.0169768	0.0350664	0.0151958	0.0196853	0.0392476	0.064579	0.0527311	0.0241255	0.0531361	0.043741	0.0448444	0.0515326	0.0199129	0.0527635	0.027954	0.027459	0.0809997	0.0295542	0.041373	0.027182	0.0306108	0.0439612	0.0209019	0.0157028	0.0425887	0.0472419	NCBP2
504	6.20963e-59	6.2899e-58	0.0403104	0.0356638	0.0373784	0.0213246	0.0701887	0.0665718	0.0399518	0.0265521	0.0633147	0.0657783	0.0662943	0.0641258	0.0262135	0.0403104	0.0376897	0.0414687	0.0547061	0.0241386	0.05234	0.021591	0.0333032	8.35007e-06	0.0174505	0.0374102	0.0334835	0.0310507	0.0854817	0.0285276	0.0126342	0.0333242	0.0321302	AC025164.1
504	1.84717e-28	9.19693e-28	0.0165038	0.0135193	0.0143077	0.0124307	0.00202795	0.00206306	0.0170366	0.00808176	0.00917071	0.00139012	0.00224393	0.00148787	0.0120271	0.0150017	0.00468565	0.0118637	0.00914887	0.00369193	0.00744389	0.00899675	0.0165038	0.00125032	0.0118337	0.0106639	0.00545765	0.01542	0.00317662	0.00653332	0.0138321	0.0118084	0.00883323	SHISA8
505	9.90605e-39	6.52197e-38	0.0189282	0.0166852	0.0185963	0.0208021	0.0204312	0.0167918	0.01991	0.00843376	0.0118777	0.0212169	0.0149515	0.0208445	0.00710763	0.0183729	0.0113049	0.0174032	0.0185404	0.0158803	0.0161514	0.0145036	0.0182652	0.00185367	0.0146268	0.0189282	0.0189336	0.0170113	0.01322	0.0150629	0.0120358	0.0184337	0.0210117	BACH2
506	1.50244e-57	1.47811e-56	0.0407857	0.0317289	0.0345675	0.0393666	0.0270886	0.0336136	0.0301314	0.0179165	0.0488242	0.0365579	0.0548439	0.0429464	0.0170132	0.040442	0.0443339	0.0416717	0.0410319	0.0315874	0.0344173	0.0236218	0.0280963	0.0525553	0.00679933	0.0386885	0.0287658	0.0306682	0.058353	0.0199693	0.0060134	0.0407857	0.0412768	MED30
507	2.18996e-57	2.14608e-56	0.0320163	0.0254736	0.0280577	0.0316016	0.0221052	0.0232515	0.0291086	0.000116694	0.020602	0.0220255	0.0164648	0.02166	0.0115544	0.03243	0.0500182	0.0324284	0.0220405	0.0144763	0.0316259	0.0154125	0.0241992	0.0289103	0.00809391	0.0326282	0.015081	0.0250367	0.0176652	0.0146961	0.0145918	0.0320163	0.0306947	NFATC1
508	6.79282e-32	3.73962e-31	0.0220061	0.0207719	0.0167361	0.00623891	0.00735378	0.00415031	0.0280568	0.00991104	0.011148	0.00594499	0.0188941	0.00322277	0.00651639	0.0253691	0.0347262	0.0205101	0.0380915	0.0128718	0.027725	0.00264696	0.0197118	0.0330923	0.000617148	0.0220061	0.0194272	0.0244124	0.0363248	0.0235786	0.00141376	0.0196506	0.0243508	RAP2C
512	1.65594e-39	1.10985e-38	0.0525733	0.0332719	0.0371174	0.0270388	0.0171034	0.0231121	0.0416508	0.00613285	0.0300313	0.0178342	0.0137977	0.0175205	0.0202085	0.0294151	0.0475226	0.0468775	0.0588008	0.0336973	0.0385976	0.0123531	0.0304183	0.0459611	0.00955032	0.0326945	0.0294553	0.0349813	0.0849584	0.0361949	0.00827961	0.0266766	0.0525733	NFKB2
514	2.27357e-70	2.83777e-69	0.0611746	0.0315838	0.0340115	0.0495861	0.015507	0.019785	0.0414777	0.0263335	0.00260572	0.0189376	0.0252695	0.0252624	0.0280148	0.0614358	0.0335902	0.0451377	0.0497477	0.0325439	0.0630971	0.0250328	0.0371117	0.0980551	0.0127181	0.0611746	0.0309478	0.0366039	0.0187495	0.0412786	0.0153101	0.0565579	0.0624303	ALG13
522	9.28264e-29	4.66539e-28	0.0272356	0.0267732	0.0272356	0.0215296	0.00967298	0.0117439	0.0258388	0.00543525	0.0116275	0.00919666	0.0074903	0.00888956	0.00458186	0.0213571	0.0195893	0.0295061	0.0470573	0.0172423	0.0206537	0.0148557	0.0228871	0.000726383	0.0133755	0.0193669	0.0270389	0.0248492	0.0500556	0.0175565	0.0068986	0.0164604	0.0185071	ZNF107
522	1.71134e-22	7.1086e-22	0.0180842	0.0164329	0.0180842	0.0151801	0.00804171	0.0139146	0.014158	0.0141854	0.035412	0.0058351	0.00875937	0.00670476	0.00721081	0.0181175	0.00904148	0.0213495	0.0195692	0.00710302	0.0155894	0.0137656	0.0133906	0.022449	0.0132058	0.0132089	0.0120105	0.00937811	0.0244366	0.0113271	0.00367975	0.0133939	0.00865576	STAMBPL1
525	2.59585e-38	1.68884e-37	0.0214328	0.0241891	0.0256143	0.0147691	0.0218903	0.0173267	0.0128635	0.00875705	0.00916285	0.0246951	0.0209671	0.0248528	0.00630651	0.0214328	0.0303654	0.0283417	0.0190035	0.0123351	0.0240254	0.0160601	0.0220695	0.0303698	0.0180361	0.0203929	0.0146806	0.0147834	0.00860206	0.0175474	0.00097943	0.016831	0.0198194	EXOG
528	2.90474e-58	2.90111e-57	0.0402033	0.00427044	0.00688051	0.0118181	0.0148314	0.0126234	0.00297158	0.00598035	0.0361276	0.0183448	0.0279439	0.0217286	0.0179661	0.0363658	0.010755	0.0111701	0.032049	0.00715562	0.027197	0.00578957	0.015403	0.0209466	0.0177219	0.0402033	0.0140767	0.00522183	0.0345002	0.0183391	0.00048259	0.0404479	0.028636	UHMK1
539	5.43236e-43	3.95722e-42	0.0286456	0.0245889	0.0255829	0.0147209	0.0270992	0.0213463	0.0171627	0.00628707	0.015596	0.0277274	0.0429928	0.032389	0.00629417	0.0286456	0.0356624	0.0326907	0.0499193	0.0170288	0.0296355	0.0147946	0.0233392	0.00695935	0.0177227	0.0209921	0.0304588	0.0261973	0.0461551	0.0250363	0.015815	0.0219169	0.0245116	CEPT1
547	3.74751e-66	4.32647e-65	0.052647	0.0437508	0.0458444	0.0205696	0.0185194	0.017125	0.0484131	0.0267024	0.0186237	0.0209581	0.0235319	0.024005	0.0358971	0.0552081	0.057101	0.0555472	0.0634117	0.0264718	0.0607511	0.0426357	0.0464573	0.034664	0.00231025	0.052647	0.0356219	0.0410598	0.0435709	0.0311558	0.0143117	0.0489406	0.0500822	CWF19L2
550	8.03685e-66	9.2245e-65	0.0480472	0.0285659	0.0268405	0.0203991	0.0351844	0.028639	0.0161853	0.0254851	0.0119477	0.0442882	0.0469613	0.0472465	0.0234744	0.05018	0.0246307	0.0299025	0.00872995	0.0226558	0.03412	0.0310721	0.0395686	0.0158107	0.00528971	0.0480472	0.0213924	0.0175997	0.0119901	0.0347783	0.00125436	0.0485438	0.0487747	ATG12
552	1.44474e-42	1.04403e-41	0.0343991	0.0286857	0.0290418	0.0201248	0.0405338	0.0338268	0.0180478	0.0106583	0.0151481	0.0456595	0.0413756	0.0457961	0.0122635	0.0343991	0.0437786	0.0364449	0.0361587	0.019321	0.0342826	0.0223519	0.0264759	0.0263375	0.0220705	0.0301549	0.0226538	0.0144489	0.0614762	0.0223753	0.000750385	0.0268311	0.0313566	TAF3
552	3.34115e-56	3.19702e-55	0.0325076	0.022488	0.0237547	0.0206799	0.0135368	0.0107619	0.0211467	0.00442748	0.0137141	0.0202961	0.0224885	0.0226388	0.0068693	0.0325076	0.0330691	0.0351872	0.0292902	0.0109184	0.033363	0.0124805	0.0257097	0.0165381	0.0207173	0.0341356	0.0193461	0.0152266	0.0743649	0.0185886	0.0176435	0.0307057	0.0394001	RABEP1
555	9.6755e-25	4.3071e-24	0.028969	0.0401658	0.0397798	0.0440777	0.166233	0.133078	0.0342619	0.0323789	0.0720121	0.163931	0.161696	0.158145	0.0195685	0.034224	0.0216477	0.0415069	0.100518	0.0493459	0.02668	0.0398977	0.0368701	0.0103772	0.0345652	0.028159	0.0753976	0.0394854	0.212721	0.0446755	0.0312049	0.028969	0.0508028	TCL1A
560	1.80224e-64	2.02831e-63	0.0361988	0.0271683	0.0251754	0.0102596	0.026051	0.0214165	0.0166209	0.0109703	0.0185484	0.0295144	0.0283407	0.02929	0.0207598	0.036213	0.0275569	0.0289064	0.027936	0.0195227	0.0265971	0.0227189	0.0265955	0.0146416	0.0208188	0.0361988	0.0256905	0.0172129	0.0129604	0.0228617	0.0126233	0.0336187	0.0282197	TTF1
562	1.87696e-64	2.11098e-63	0.0379557	0.0169917	0.0192365	0.00889128	0.0169632	0.0191967	0.0137346	0.0180349	0.0318029	0.0310156	0.0433192	0.0308366	0.022325	0.0341662	0.0132001	0.0267704	0.00207935	0.0149826	0.0191935	0.0177396	0.017441	0.0320428	0.0128558	0.0379557	0.0155412	0.0110589	0.00553686	0.0123908	0.00862984	0.0302262	0.0260119	UPF3B
563	2.31603e-44	1.75141e-43	0.0287567	0.0306513	0.0309378	0.0291821	0.0294373	0.0267259	0.0354115	0.0127524	0.0208972	0.0296682	0.0272252	0.0297011	0.00748202	0.0265405	0.0340748	0.034815	0.0432017	0.0178163	0.0311341	0.0173057	0.0287567	0.0108601	0.0176758	0.0226862	0.0263731	0.0248701	0.0333049	0.0221194	0.0129249	0.0212411	0.0233756	TMEM131L
567	1.247e-36	7.77792e-36	0.0214509	0.0208088	0.0192118	0.00709439	0.00652865	0.00225836	0.0242406	0.00536471	0.00229925	0.0113376	0.012031	0.0076805	0.00463692	0.0214509	0.0253778	0.022097	0.0225693	0.0181152	0.0197193	0.0108593	0.0205432	0.0167279	0.0174931	0.0161894	0.0229724	0.0209685	0.0367298	0.0203141	0.0045757	0.0163964	0.0211438	DCLRE1C
569	1.98207e-18	7.12864e-18	0.030795	0.0197064	0.0199471	0.00568984	0.0101564	0.00297861	0.00850659	0.00559761	0.00710936	0.0148182	0.0206698	0.0167425	0.0101503	0.0174337	0.0386736	0.030795	0.00874218	0.00557326	0.0227818	0.00988816	0.0154978	0.0225656	0.0192737	0.0122832	0.00165693	0.0169568	0.0669748	0.0138771	0.00654705	0.0108761	0.0188739	CBWD5
575	7.96102e-22	3.22265e-21	0.0123816	0.0143766	0.0138083	0.0146476	0.00405485	0.00425493	0.017476	0.0040023	0.0044862	0.00416127	0.00181573	0.00387733	0.0055592	0.0123816	0.0146672	0.0143777	0.0183431	0.0115654	0.0152915	0.00303698	0.0145652	0.0183444	0.00974043	0.00986656	0.00960502	0.013234	0.00708726	0.0134602	0.00172821	0.00990915	0.015348	LINC00324
595	7.78608e-46	6.06995e-45	0.0237023	0.0288639	0.0293872	0.0269685	0.0236445	0.0213714	0.0388746	0.0161004	0.010248	0.0216755	0.0284767	0.0242945	0.00920828	0.0237023	0.0480397	0.0348324	0.0224622	0.0192521	0.0372668	0.0212733	0.0284021	0.00133545	0.0157903	0.0236639	0.0201528	0.0254917	0.0788666	0.0202113	0.00607885	0.0223973	0.022856	GPM6B
596	1.11642e-34	6.59662e-34	0.0176074	0.016894	0.0161967	0.0147089	0.024191	0.0274102	0.016799	0.00707149	0.0340856	0.0226298	0.0281912	0.0234233	0.0129555	0.0176074	0.0195123	0.0195901	0.0143183	0.0141399	0.0135146	0.0166372	0.0145431	0.0106612	0.0153417	0.0144504	0.0174468	0.0121257	0.0245013	0.0139287	0.00568159	0.0157422	0.0164371	MAP4K2
598	9.81591e-51	8.45636e-50	0.0397706	0.0242438	0.0256783	0.0213235	0.0232933	0.0209929	0.0214011	0.0113084	0.0306138	0.0297747	0.0337803	0.0313506	0.0256217	0.0394722	0.0353686	0.0279213	0.0361607	0.0227646	0.0404075	0.0203139	0.0271875	0.00720753	0.0205729	0.0370275	0.0244314	0.0113709	0.0541882	0.0241451	0.00217184	0.0397706	0.0365733	MTF2
604	4.48096e-38	2.8945e-37	0.0253422	0.0243123	0.0265462	0.0216789	0.0188861	0.0188561	0.00435697	0.013466	0.0343932	0.0175159	0.0232407	0.0189702	0.0112695	0.0227701	0.0255603	0.0313272	0.0412451	0.0214894	0.0262459	0.022293	0.0203189	0.00977653	0.00775303	0.0253422	0.0306205	0.00709817	0.0773354	0.0240678	0.0062642	0.0259226	0.0237556	KPNA5
604	2.95215e-61	3.13718e-60	0.0389063	0.0161016	0.0203869	0.0270381	0.0119992	0.0120082	0.0139467	0.010137	0.0133156	0.0128592	0.0136492	0.0143075	0.0134278	0.0289678	0.0237583	0.0217251	0.0317401	0.0142216	0.0343462	0.0079981	0.0264333	0.0079272	0.00419504	0.0389063	0.0138789	0.00147169	0.0212545	0.0149053	0.00296962	0.0369052	0.0270997	DENND4A
607	3.5655e-24	1.56171e-23	0.0149781	0.0140129	0.0146407	0.0162631	0.0158032	0.0192013	0.0145532	0.00315379	0.0271912	0.0140787	0.0158887	0.0141391	0.00972056	0.0125695	0.0107481	0.0152075	0.0133554	0.0120735	0.0115449	0.0117516	0.0149781	0.0128015	0.0129023	0.0119854	0.013011	0.0150312	0.0142481	0.0132926	0.0016298	0.0118932	0.0137254	P2RY8
618	1.04809e-29	5.42285e-29	0.0307474	0.0199618	0.0228547	0.0196386	0.0126528	0.0116998	0.0163267	0.0117021	0.0143433	0.0171157	0.0211992	0.0201047	0.0177512	0.0307474	0.00883459	0.030376	0.0543101	0.0142284	0.0292493	0.0153326	0.0224138	0.0113618	0.0101533	0.0251212	0.0222541	0.0181296	0.0331566	0.0123996	0.00805176	0.0241619	0.0277119	PHF6
621	5.89611e-60	6.09568e-59	0.100368	0.0710678	0.0808814	0.100368	0.0736893	0.0601179	0.0706217	0.0571419	0.0371083	0.0923804	0.101002	0.101236	0.0396711	0.0866893	0.0712891	0.0984128	0.0436645	0.0618694	0.080925	0.0690903	0.0614003	0.09429	0.0468434	0.0633974	0.04518	0.0492951	0.038839	0.0399282	0.0504978	0.0630188	0.0941535	TCEA1
624	6.28807e-36	3.85115e-35	0.0503095	0.0335759	0.0364836	0.0355448	0.0223562	0.0232893	0.0460213	0.0138904	0.0227738	0.0241793	0.0341513	0.0294452	0.0177144	0.0296691	0.0256271	0.0401385	0.0420593	0.0223053	0.0382615	0.0274505	0.0365027	0.0426212	0.0317477	0.0226423	0.0295106	0.0372863	0.0495409	0.0283811	0.0169405	0.0225785	0.0503095	NGLY1
628	1.2152e-37	7.75404e-37	0.0248398	0.0219966	0.0205886	0.00775891	0.0177419	0.0220125	0.0129667	0.0155501	0.0328181	0.0167926	0.0243563	0.0188446	0.0158567	0.0248398	0.0226396	0.0249908	0.0540188	0.0233423	0.0233475	0.00975886	0.0251158	0.0220436	0.00273836	0.0196108	0.0341003	0.0153764	0.0189534	0.0257918	0.0235256	0.0238399	0.034818	SNX29
647	1.37316e-40	9.47398e-40	0.0261105	0.0221293	0.0256848	0.0159446	0.0217832	0.0169895	0.0182013	0.00831018	0.00899406	0.0206465	0.0119408	0.0188724	0.0156815	0.0239949	0.0285614	0.0279099	0.0233859	0.0157609	0.0278575	0.0148724	0.0241066	0.00697312	0.019046	0.0261105	0.0198253	0.0140918	0.0380294	0.0183066	0.0236694	0.0254587	0.0300443	KDM4B
648	1.65774e-45	1.28252e-44	0.0332861	0.0321552	0.0332861	0.0276558	0.0406885	0.0383145	0.00253482	0.00765301	0.035689	0.0424137	0.0328729	0.0426318	0.0101292	0.0223286	0.0340121	0.0307673	0.0283721	0.029901	0.0264796	0.010301	0.0296552	0.0229103	0.0116616	0.0211256	0.0278708	0.00576988	0.0601378	0.0282335	0.00226178	0.0203448	0.0303234	N4BP2L1
650	1.26633e-24	5.61384e-24	0.0157682	0.0150776	0.0157682	0.0129376	0.0061978	0.00736686	0.020677	0.00606948	0.00930195	0.00542141	0.0063421	0.00537702	0.00459375	0.00990563	0.0094748	0.0161159	0.0183432	0.00965907	0.0141858	0.00812578	0.0145832	0.0127238	0.0113039	0.0116529	0.0124502	0.0170833	0.00726938	0.0126522	4.78755e-05	0.00940179	0.0076545	LINC00426
664	9.74405e-42	6.88862e-41	0.0237162	0.024362	0.0233081	0.0174445	0.0130086	0.00925715	0.0146985	0.00778944	0.00934277	0.0142168	0.0157012	0.0138096	0.0102789	0.0237162	0.0299383	0.0315264	0.0419896	0.0108436	0.0254879	0.0142736	0.0224656	0.0136358	0.014157	0.01972	0.0231822	0.0211225	0.038525	0.0186523	0.017003	0.0184306	0.0219545	MICAL3
679	7.74364e-65	8.7709e-64	0.0637102	0.053983	0.0637102	0.0585528	0.0275094	0.0232445	0.0600887	0.0273086	0.0316662	0.0387479	0.0413285	0.043646	0.0157623	0.0513845	0.0200961	0.0680628	0.0668455	0.0425372	0.0444599	0.0269909	0.0512955	0.0324857	0.00898147	0.0410634	0.0494142	0.0544856	0.0572709	0.0323252	0.0151777	0.0377813	0.0536134	RNASEH2B
689	1.54872e-48	1.27462e-47	0.027311	0.0251101	0.0351467	0.0343227	0.0320996	0.0318654	0.0267058	0.0072678	0.0226261	0.0442345	0.048278	0.048854	0.012325	0.027311	0.0398615	0.0366464	0.0349445	0.0206936	0.0338624	0.0133876	0.0308696	0.00344597	0.012058	0.0335569	0.0290551	0.0197896	0.0295411	0.0210486	0.00441443	0.0310973	0.0276134	RPA2
694	6.87484e-37	4.31292e-36	0.0335275	0.0258748	0.0302379	0.026403	0.0319634	0.0297546	0.0275889	0.0112713	0.0155482	0.0366406	0.0343328	0.0403375	0.00663676	0.0335275	0.0405395	0.0381553	0.0178925	0.0174676	0.0282091	0.0245756	0.0213541	0.0357761	0.0215092	0.0256771	0.0142757	0.0179018	0.0201479	0.0192874	0.0113907	0.0279712	0.0354395	ZCCHC7
698	8.19858e-24	3.55848e-23	0.0192388	0.0152813	0.0133115	0.0117194	0.00359958	0.00140687	0.0151096	0.000963162	0.00498426	0.0119629	0.0261773	0.0184206	0.00310091	0.012777	0.0152656	0.0227035	0.0249332	0.00842712	0.0213053	0.00757427	0.0115181	0.0169272	0.00307383	0.0192388	0.0143094	0.0105325	0.0281583	0.010904	0.00336948	0.0116317	0.020991	UTP3
702	3.25407e-26	1.5124e-25	0.0164849	0.0198874	0.0197826	0.0135347	0.00531357	0.00412873	0.024682	0.0054069	0.00926349	0.00578883	0.00875992	0.00624799	0.00351819	0.0148152	0.0193593	0.0172134	0.0126278	0.0152696	0.0197581	0.0143674	0.0204103	0.0148994	0.0107738	0.0164849	0.0143752	0.0149356	0.0105461	0.0173338	0.0121983	0.0148061	0.0131741	COCH
709	5.28673e-48	4.30669e-47	0.0261029	0.0237533	0.0269878	0.0238941	0.00499787	0.00602475	0.032927	0.00326899	0.00516675	0.00511647	0.0032922	0.00506592	0.00946538	0.0261029	0.0114487	0.0255797	0.0309764	0.0116024	0.0210191	0.0124373	0.0265123	0.00089559	0.0133039	0.0240304	0.0190276	0.0239959	0.0249337	0.0158412	0.00352209	0.023762	0.0195154	TTN
714	4.69092e-26	2.17089e-25	0.022352	0.0193882	0.0210482	0.0125857	0.0535325	0.0482441	0.0153535	0.0149306	0.0331837	0.0529753	0.0450129	0.0503571	0.0116084	0.0144217	0.0392901	0.0231637	0.0159288	0.0115744	0.024103	0.0168133	0.022352	0.0260903	0.0183315	0.0175833	0.0142155	0.0157955	0.00374126	0.0143466	0.00706119	0.0147705	0.0208006	RNGTT
717	5.60041e-19	2.05477e-18	0.00956629	0.00541916	0.00774687	0.006335	0.00632964	0.00360499	0.00265701	0.000681818	0.00673754	0.00911282	0.0123028	0.0102583	0.000290573	0.00956629	0.000499666	0.0116971	0.0114008	0.00491048	0.0060008	0.00623108	0.00476535	0.00232128	0.00793071	0.0063632	0.00576608	0.00305225	0.00673168	0.00311324	0.0023379	0.00737926	0.00679187	UBIAD1
735	6.67735e-43	4.85359e-42	0.0284386	0.0266475	0.0230712	0.00250964	0.0180795	0.0137162	0.018051	0.0090784	0.022427	0.0222085	0.0286276	0.0254917	0.012743	0.0284386	0.00948102	0.0320139	0.0531802	0.022495	0.0247275	0.0228502	0.0231736	0.0321376	0.0135999	0.0252185	0.027703	0.0205376	0.12929	0.0277852	0.00169022	0.0221357	0.0331255	ZNF830
746	3.13182e-42	2.24242e-41	0.0316142	0.0328276	0.0316172	0.0147075	0.0194901	0.0147143	0.0252918	0.00842647	0.0297682	0.0211112	0.0311993	0.0227816	0.0097433	0.0316142	0.0396603	0.0319263	0.0245745	0.0256623	0.0287284	0.0259037	0.0260293	0.0252557	0.0139798	0.028108	0.0217043	0.0278427	0.0173326	0.0279374	0.00584841	0.0279063	0.0351179	CLK4
750	1.62673e-32	9.11108e-32	0.0397764	0.037213	0.0397764	0.0371347	0.0219685	0.0159858	0.0394507	0.013669	0.014679	0.0254873	0.0326527	0.0300711	0.00935352	0.0284356	0.0117978	0.0459029	0.0561296	0.0252185	0.0299509	0.00807839	0.0285837	0.0147906	0.0213658	0.0296484	0.0340603	0.0264498	0.0441045	0.0216262	0.0148393	0.0276828	0.0359125	ARL14EP
766	2.76615e-52	2.44843e-51	0.051519	0.0455739	0.051519	0.0428106	0.0429705	0.0329639	0.0673103	0.0204247	0.0413343	0.0425245	0.043259	0.0397149	0.0110027	0.040306	0.0682798	0.0547417	0.0292817	0.025826	0.0546717	0.0166333	0.0424603	0.0197317	0.0235247	0.0394423	0.0300273	0.0421164	0.0396967	0.0288134	0.0187824	0.0379863	0.0445537	TLE3
776	4.60364e-21	1.81643e-20	0.0167705	0.0176487	0.0161131	0.0057479	0.0221243	0.0137854	0.010446	0.0151577	0.0102396	0.0242651	0.0225691	0.0238552	0.0104501	0.0167705	0.0338368	0.0215462	0.011025	0.0140137	0.0206219	0.0162764	0.0140051	0.019013	0.0161214	0.0112897	0.00993004	0.0107212	0.00892173	0.0162364	0.0127739	0.0135902	0.0172837	NEK8
783	1.24329e-27	6.04659e-27	0.0201603	0.0101282	0.020122	0.0206473	0.0129974	0.00850737	0.0268292	0.0109947	0.00921112	0.026228	0.0271048	0.0262486	0.00941268	0.0201603	0.0340636	0.0269926	0.0228098	0.0151154	0.0237239	0.000426117	0.0169314	0.0412302	0.0177607	0.0189292	0.0151971	0.0267481	0.0287669	0.00806182	0.0109486	0.018843	0.0246292	MCM5
804	2.00983e-20	7.73446e-20	0.0115817	0.0124335	0.0123242	0.0112529	0.028801	0.0229309	0.0141098	0.00502044	0.016705	0.0286706	0.0296776	0.0279959	0.00216113	0.0085685	0.021131	0.0137302	0.00743036	0.00679372	0.0113038	0.00873847	0.0115817	0.0178273	0.0112157	0.00570446	0.0070995	0.0124172	0.00343332	0.00859374	0.00750174	0.00623781	0.010669	PRCD
832	3.0939e-44	2.33386e-43	0.0262669	0.0230288	0.0226526	0.0193937	0.0185505	0.0190448	0.0240495	0.0102199	0.00804814	0.0247744	0.0251722	0.0263103	0.0110771	0.0262669	0.0267828	0.0244956	0.0281755	0.0188529	0.0252748	0.0146082	0.023696	0.014353	0.0126367	0.0215305	0.0293047	0.0181129	0.0857423	0.021264	0.00861069	0.0188552	0.0214361	CHMP7
852	2.78297e-34	1.6286e-33	0.0438995	0.0306198	0.0351879	0.0438995	0.0353842	0.0346075	0.0395404	0.0076567	0.0317166	0.0440659	0.0560443	0.0548796	0.00249944	0.0279561	0.021606	0.0464486	0.0652896	0.0145309	0.0433575	0.00782343	0.0291088	0.0067998	0.00771476	0.0224643	0.0439776	0.0230036	0.0743606	0.0200257	0.00603401	0.0203971	0.0446305	LSM10
860	1.12151e-30	5.9846e-30	0.028428	0.0167637	0.0201504	0.0219655	0.0161679	0.0187793	0.0316314	0.0020163	0.0311933	0.01588	0.0302223	0.0191702	0.0152322	0.0278394	0.044521	0.0241248	0.0236706	0.0130637	0.0333167	0.00136913	0.0215092	0.0198728	0.0141434	0.028428	0.0191343	0.0250292	0.0114576	0.015826	0.00655635	0.019972	0.0311021	MSL3
861	1.5432e-19	5.76861e-19	0.0104667	0.0124876	0.0116981	0.00990031	0.0238415	0.0197328	0.00820482	0.00647707	0.0191516	0.0257775	0.0307628	0.0275716	0.00487502	0.0104667	0.00197738	0.0107043	0.0136332	0.0136641	0.00078579	0.0120635	0.00735032	0.00935715	0.00653879	0.00944838	0.0159641	0.00530011	0.0133717	0.00458223	0.00185352	0.00927445	0.014099	ADPRM
866	1.35884e-30	7.22802e-30	0.0200779	0.0253253	0.0257788	0.0136141	0.0105123	0.000997271	0.00316626	0.00390883	0.00209944	0.011236	0.0088332	0.0117265	0.00203689	0.0200779	0.025429	0.0302313	0.0209403	0.013212	0.0196809	0.0144315	0.0180942	0.0367934	0.00921594	0.0202716	0.0154135	0.0154351	0.0280359	0.0171096	0.00282727	0.0179928	0.0208874	ZFP14
872	8.72913e-43	6.33537e-42	0.0235672	0.0160303	0.0169826	0.0173871	0.0131605	0.00301956	0.010166	0.00225487	0.000566519	0.0171851	0.0168551	0.0187483	0.00239575	0.0235672	0.0285316	0.0179612	0.0209581	0.00627084	0.0207117	0.00345483	0.0154375	0.0282415	0.00891924	0.0224607	0.00334103	0.00847019	0.033177	0.0115945	0.00862352	0.0198965	0.0217797	RNF41
884	1.51634e-30	8.05941e-30	0.0200366	0.0162227	0.0179282	0.0184807	0.0249304	0.0232697	0.0192052	0.0153313	0.0160159	0.025164	0.019676	0.0246316	0.0186109	0.0187916	0.0174546	0.0185942	0.0133241	0.0132747	0.0183105	0.00638034	0.0190068	0.0207536	0.0106034	0.020112	0.0157335	0.0195358	0.00804297	0.0148377	0.00927824	0.0200366	0.017721	IL2RA
905	1.94132e-18	6.98434e-18	0.00930365	0.00899238	0.00968998	0.00817386	0.0204926	0.0189626	0.0109865	0.00722709	0.00835155	0.0209908	0.0125194	0.0204197	0.00615831	0.00792268	0.00906821	0.00871593	0.00602605	0.00703929	0.00890407	0.00877258	0.0099058	0.000952141	0.00668816	0.00891652	0.00857716	0.00933331	0.00224537	0.00609727	0.00960108	0.00930365	0.00928219	PLEKHG7
917	4.12095e-27	1.97075e-26	0.0146319	0.00862517	0.0108686	0.00587315	0.0109017	0.013859	0.0165508	0.011023	0.0211692	0.0100436	0.0088567	0.0103369	0.0108329	0.0146319	0.00975187	0.00883919	0.0120775	0.00493221	0.0110976	0.00822218	0.0135126	0.00452247	0.00930523	0.0129856	0.0120821	0.0138069	0.019814	0.00774685	2.96511e-05	0.0127635	0.00758619	CARD11
919	5.11588e-34	2.97205e-33	0.0199868	0.0129227	0.0142346	0.0143211	0.0110016	0.00621321	0.0145198	0.00317693	0.00986819	0.0212526	0.0211433	0.0232848	0.00428719	0.0199868	0.0180171	0.0188611	0.0149285	0.0107792	0.0156906	0.0151685	0.0119305	0.00542288	0.00888088	0.0164985	0.00887563	0.0101774	0.00846703	0.00718786	0.00440721	0.0158477	0.0187625	NUP107
945	3.19483e-26	1.48549e-25	0.0204216	0.0205942	0.0204221	0.0197115	0.0106969	0.00930057	0.0214161	0.00461071	0.0197942	0.0121112	0.00579154	0.0122446	0.0121084	0.0204216	0.030937	0.0262131	0.031007	0.0148546	0.0282973	0.0127519	0.0215899	0.0202993	0.00973808	0.0203529	0.0180458	0.0189348	0.0168185	0.0132819	0.0044865	0.0208925	0.0215204	CEP135
954	1.51302e-20	5.85277e-20	0.0127303	0.0072258	0.00553268	0.00310162	0.00552648	0.00590057	0.00562643	0.00688559	0.00988597	0.0047601	0.00589296	0.00467711	0.00706343	0.0127303	0.0107503	0.0070075	0.00781158	0.00666253	0.0081125	0.00857676	0.00919792	0.00596716	0.00872021	0.00818225	0.0105129	0.00649468	0.00803024	0.00846173	0.00923466	0.00715089	0.0102555	RHOBTB2
957	2.39736e-27	1.15671e-26	0.0237742	0.0179918	0.016275	0.0111516	0.00748032	0.0117114	0.0253072	0.00892222	0.00952364	0.00230535	0.0219168	0.00619784	0.006225	0.0173262	0.0113803	0.0176255	0.0288593	0.00898726	0.0161543	0.00737623	0.0178996	0.0124301	0.00232263	0.0158017	0.0197899	0.0237742	0.06861	0.0167677	0.00718526	0.0151483	0.0171583	LPAR5
964	2.31675e-40	1.58829e-39	0.0278363	0.0227484	0.0233739	0.0123317	0.0193272	0.020954	0.0184249	0.00919857	0.00437633	0.0260802	0.0238125	0.0278635	0.00653955	0.0278363	0.0186672	0.0328319	0.049743	0.0096987	0.0231869	0.0147082	0.0223311	0.00389988	0.00607322	0.0245615	0.0170891	0.0134189	0.05876	0.0139286	0.00497409	0.0198492	0.0301691	COQ7
964	3.34502e-27	1.60517e-26	0.0207973	0.0155416	0.0173056	0.0196384	0.00740119	0.00551687	0.015744	0.00463509	0.00914714	0.0082662	0.00985626	0.00781488	0.00567097	0.0207973	0.0231366	0.0242866	0.00533743	0.00625099	0.0180456	0.00524615	0.0155349	0.0185727	0.0150343	0.0131576	0.00887681	0.00999729	0.0343414	0.00536334	0.00175848	0.0119797	0.0182789	C16orf87
974	9.46276e-33	5.3401e-32	0.0220167	0.0161224	0.0151465	0.00663451	0.00704277	0.0100682	0.0193838	0.0122337	0.00728818	0.00935258	0.0102727	0.0100476	0.00961563	0.0220167	0.0107394	0.0171989	0.0269038	0.0156382	0.0150297	0.016546	0.0174427	0.0191174	0.0128459	0.01705	0.022121	0.012399	0.0269988	0.0168329	0.000186376	0.0186245	0.0227889	TRAPPC2
999	1.52371e-11	4.26314e-11	0.00809376	0.00814131	0.00789317	0.00889322	0.00178032	0.00304635	0.0119799	0.0026402	0.00345569	0.00330927	0.0111105	0.00786869	0.00239764	0.00807485	0.0030475	0.0106908	0.0113481	0.00333148	0.00923522	0.00496716	0.00826228	0.01159	0.00809376	0.00737244	0.00502624	0.0102303	0.0231101	0.00458616	0.00487445	0.00519341	0.00795258	DUS2
1000	1.35333e-13	4.08681e-13	0.0118794	0.0125633	0.0118794	0.00931713	0.00693845	0.00523612	0.0110235	0.0081979	0.00216049	0.00662859	0.00659633	0.00576756	0.00762052	0.00848728	0.0251406	0.0144843	0.0148009	0.0106287	0.0147895	0.00840468	0.00995977	0.0197279	0.00912828	0.00779531	0.011319	0.0104342	0.00463436	0.0124975	0.00075195	0.00523581	0.00722749	SIDT1-AS1
1000	3.13549e-33	1.79114e-32	0.0208337	0.0139079	0.0171843	0.0120654	0.0102843	0.0109217	0.0133889	0.00620755	0.0117113	0.0117622	0.0121604	0.0113518	0.0114907	0.0218575	0.0238032	0.0214418	0.00976892	0.00707168	0.0140755	0.0101038	0.017688	0.00848718	0.00523439	0.0206656	0.00884078	0.00943742	0.0160186	0.00956355	0.00739896	0.0208337	0.0229278	FAM76B
1007	8.17788e-23	3.43481e-22	0.0143393	0.00948182	0.0107393	0.00973939	0.0111868	0.00849578	0.0013735	0.00425782	0.00952796	0.0123936	0.00766718	0.0121497	0.00115062	0.0143393	0.0041326	0.0136012	0.0143192	0.00669844	0.00865122	0.00470919	0.00989618	0.0194638	0.00897197	0.0113471	0.00950139	0.000689132	0.00392534	0.00859523	0.00469107	0.0118043	0.0133208	ZNF891
1016	1.01487e-35	6.17728e-35	0.0215088	0.0205481	0.0212909	0.0178425	0.00424386	0.0036285	0.0268376	0.00602567	0.00723343	0.00396275	0.00525796	0.00477568	0.00444959	0.0162679	0.0200903	0.0207466	0.019643	0.0074117	0.0170886	0.00163365	0.0215088	0.0215417	0.00191273	0.0140853	0.0112967	0.0235164	0.00763337	0.013232	0.011961	0.0130516	0.0137841	ARL11
1022	2.95866e-38	1.92152e-37	0.0337785	0.00955348	0.00841839	0.0189208	0.0146008	0.0189708	0.026359	0.0132798	0.0197467	0.0200215	0.0421015	0.0350756	0.0257284	0.035032	0.00260227	0.0104081	0.0273483	0.0134816	0.0372865	0.0117013	0.0238899	0.030066	0.0246048	0.0337785	0.0101279	0.00660556	0.0038364	0.0120775	0.00245553	0.0275835	0.0436846	CHCHD7
1032	2.56529e-37	1.62575e-36	0.0214311	0.0116866	0.0146253	0.00873218	0.0168867	0.0185729	0.0117652	0.00556871	0.0296379	0.0163714	0.0103143	0.0144683	0.00926507	0.0200423	0.0187976	0.0181548	0.0190545	0.00599396	0.0161954	0.0107923	0.0159713	0.00201001	0.00483878	0.0214311	0.0100282	0.0099888	0.0378212	0.0101874	0.000675421	0.0149735	0.015638	WHAMM
1043	3.08754e-29	1.57538e-28	0.017821	0.00800392	0.00848635	0.00867776	0.0099539	0.00569129	0.0102883	0.000718632	0.000245943	0.013285	0.0153963	0.015013	0.00393174	0.017821	0.0114168	0.0103721	0.0114928	0.00805747	0.011906	0.000463026	0.00713143	0.0345185	0.00876175	0.0126179	0.0147169	0.012731	0.0164325	0.00895499	0.00156649	0.0122079	0.0144481	TTC9C
1051	1.0845e-26	5.11417e-26	0.0154465	0.0190565	0.01775	0.00494568	0.0144326	0.0116196	0.0148989	0.00475566	0.00703812	0.013927	0.00834206	0.0132154	0.0102993	0.0167083	0.0197966	0.0215773	0.0124297	0.0166143	0.0238468	0.0105446	0.0174786	0.000120737	0.0079967	0.0156582	0.0154761	0.0149013	0.0236434	0.0167062	0.00526535	0.0154465	0.0191001	ZNF274
1055	6.37413e-33	3.61474e-32	0.0318813	0.029832	0.0283075	0.0279978	0.0361944	0.0329696	0.0193928	0.0107093	0.0276195	0.0339136	0.0322198	0.0325618	0.0135722	0.0318813	0.0314082	0.0341693	0.0228419	0.0134092	0.0241407	0.0011165	0.0184336	0.0060033	0.0178642	0.0279091	0.0258937	0.0285452	0.0102112	0.0217845	0.00387209	0.0259181	0.0299324	SIPA1
1062	3.54082e-14	1.09107e-13	0.0114594	0.00932535	0.00946034	0.00815562	0.00556628	0.00509357	0.00805976	0.00616269	0.00744864	0.00574478	0.00845259	0.00604573	0.0059293	0.0114594	0.0118146	0.0106097	0.0153845	0.00634966	0.0121034	0.00703043	0.00590803	0.00972844	0.00965589	0.00832291	0.0086467	0.00414842	0.00899942	0.0083056	0.000656065	0.0085763	0.0105623	POC1B-AS1
1077	2.11396e-39	1.41344e-38	0.0275452	0.0261245	0.0243551	0.0239659	0.0228317	0.0311827	0.0231306	0.00354811	0.0288076	0.0245853	0.0284712	0.0257898	0.00654396	0.0291421	0.0393822	0.0353982	0.0231276	0.0175673	0.0380816	0.0165834	0.0238099	0.0469747	0.0168109	0.0275452	0.0133505	0.0132419	0.013838	0.021399	0.00609692	0.028368	0.0340469	ING3
1115	1.46818e-17	5.11156e-17	0.0112095	0.0102264	0.00612382	0.000774111	0.00513318	0.00612634	0.00831946	0.00700606	0.00228774	0.0111839	0.0178078	0.0151723	0.00925336	0.0112095	0.0043732	0.00995859	0.0137207	0.00537826	0.0103491	0.0115474	0.00926091	0.0144962	0.0130534	0.0133878	0.0103722	0.00904018	0.0455156	0.00853216	0.00778597	0.0115806	0.0125733	NARFL
1122	2.503e-12	7.20502e-12	0.00904081	0.00939843	0.00947143	0.00748404	0.00806261	0.00465374	0.0104549	0.00412825	0.000901397	0.00893481	0.0107979	0.0104953	0.00369387	0.00904081	0.00169205	0.0113347	0.0182743	0.00932014	0.0102473	0.00912187	0.00833523	0.000970074	0.00795859	0.00789532	0.00997682	0.00862577	0.000747095	0.00714597	0.00176407	0.00852646	0.0119305	METTL18
1133	3.41698e-35	2.05007e-34	0.0201979	0.0203484	0.0204793	0.0164518	0.0156144	0.0158785	0.024841	0.00851274	0.0152107	0.0150009	0.00348033	0.0144369	0.013637	0.0180377	0.0246853	0.0208301	0.0171721	0.00944988	0.0200418	0.00982967	0.0201979	0.0134472	0.00670516	0.0171868	0.0118034	0.0203055	0.0268139	0.012125	0.012517	0.0173208	0.0140019	SEMA7A
1159	4.70322e-24	2.05279e-23	0.0207374	0.0160592	0.0158786	0.00826982	0.0121533	0.00881026	0.0136208	0.00415866	0.00662953	0.0157347	0.016016	0.0161338	0.0055539	0.0207374	0.029785	0.020046	0.014571	0.00610958	0.0236333	0.0126202	0.0159601	0.00849566	0.0150792	0.0137573	0.00678677	0.00673176	0.020019	0.0101494	0.00184442	0.0131626	0.0192482	UIMC1
1196	2.44544e-31	1.32818e-30	0.0182461	0.0173386	0.0175805	0.0166845	0.0102809	0.0131525	0.0154918	0.00315011	0.0220127	0.010338	0.0133736	0.0117642	0.00674046	0.0182461	0.0129172	0.0193548	0.0122345	0.0114166	0.0136032	0.0108567	0.014708	0.00576123	0.0119428	0.0157604	0.013408	0.0136246	0.0303378	0.010029	0.00559832	0.0155566	0.0165233	AC027097.1
1253	2.04114e-15	6.59878e-15	0.00783989	0.00810944	0.00798478	0.00845786	0.0127035	0.0103819	0.00888303	0.00337534	0.00703831	0.0124196	0.0113019	0.0119713	0.00307743	0.00783989	0.0101957	0.00898453	0.00995451	0.00285555	0.00765641	0.00550083	0.00764781	0.000941094	0.00543489	0.00562215	0.0048694	0.00750742	0.0158215	0.0041832	0.00675071	0.00590186	0.00624627	COL19A1
1274	2.04378e-34	1.20232e-33	0.0275966	0.0275431	0.0266637	0.0222094	0.0204116	0.0171917	0.0130163	0.0092588	0.00862709	0.0233034	0.0289936	0.0264244	0.0119946	0.0265684	0.0184838	0.0310018	0.0308642	0.0164095	0.0200213	0.0178879	0.0267221	0.0311776	0.0189905	0.0275966	0.0205615	0.018504	0.00471301	0.0230776	0.0130629	0.024156	0.0287775	PIP4P1
1286	1.24547e-23	5.37795e-23	0.0146237	0.0150897	0.0156745	0.00122933	0.010588	0.010076	0.0105084	0.00476106	0.00291018	0.0125452	0.0120106	0.0125786	0.00365087	0.0146237	0.0180379	0.0201871	0.00959751	0.00710471	0.0194156	0.00850245	0.0139935	0.0224567	0.0134734	0.01477	0.0100538	0.00999831	0.0617295	0.0107388	0.00109661	0.0130928	0.0167446	LINC00909
1300	8.23002e-14	2.50357e-13	0.0103075	0.00773194	0.00872242	0.00861833	0.00455266	0.0025062	0.013025	0.00327742	0.00179601	0.00773074	0.00768218	0.00759865	0.00185437	0.0103075	0.0217987	0.0143786	0.0273766	0.00975473	0.0143603	0.00143558	0.00677671	0.00872828	0.00780833	0.00945577	0.0113838	0.0111375	0.00603794	0.00683246	0.00299674	0.00848236	0.0104527	HAUS8
1324	2.4117e-12	6.94578e-12	0.0123599	0.00939684	0.0112495	0.00533138	0.00516207	0.00618171	0.0110863	0.0048678	0.00719349	0.0057991	0.0102415	0.0078542	0.00246687	0.0123599	0.0167139	0.0154224	0.0194642	0.00875768	0.0125102	0.00845149	0.0105388	0.0187212	0.0112239	0.00947334	0.00691196	0.00712553	0.0273535	0.00887839	0.0040541	0.00825684	0.0112969	DNAJC24
1331	1.19848e-32	6.74405e-32	0.021829	0.0230589	0.021712	0.0148144	0.0324219	0.029716	0.0188104	0.0109844	0.0327726	0.0320209	0.0311558	0.0320728	0.00906388	0.0178447	0.0210583	0.0220115	0.0198602	0.0126387	0.0183413	0.0045798	0.021829	0.000123923	8.17351e-05	0.0154116	0.0193975	0.0175669	0.0137071	0.0167261	0.0128787	0.0142102	0.0135154	SLC2A6
1354	1.00579e-14	3.16703e-14	0.00942231	0.010396	0.0101962	0.00859358	0.00522846	0.00668221	0.0122016	0.0070148	0.00761722	0.00456456	0.00443435	0.00432149	0.00651815	0.00918684	0.0134137	0.0145294	0.0160606	0.00822793	0.0114681	0.00805221	0.00942231	0.0266532	0.00832482	0.00653921	0.0133185	0.0128024	0.00571745	0.0118432	0.00151371	0.00699578	0.0102384	AC109446.3
1402	9.47489e-32	5.19995e-31	0.0226322	0.0110765	0.0165575	0.0147472	0.00831137	0.00865748	0.00123178	0.00803054	0.00933141	0.014703	0.0232868	0.0195398	0.0145149	0.0204827	0.000626444	0.021064	0.00525495	0.00808958	0.0207415	0.010725	0.0136964	0.0233932	0.00785542	0.0226322	0.0112454	0.00675836	0.0031732	0.00616519	0.00784374	0.0177006	0.0175526	LYRM7
1455	6.27788e-12	1.78023e-11	0.0097584	0.00806508	0.0097584	0.00759789	0.00467771	0.00431691	0.0101011	0.00155042	0.00131421	0.00469941	0.00324798	0.0044543	0.00147003	0.00680259	0.00891141	0.0124353	0.0243656	0.0054239	0.00927416	0.00442513	0.00677628	0.000115181	0.00519573	0.00622071	0.0108051	0.00841768	0.0227277	0.00656227	0.00436463	0.0045329	0.00548371	RASGRF1
1467	5.52823e-13	1.62965e-12	0.00689234	0.00554746	0.00519287	0.00405187	0.00732424	0.00459583	0.00853829	0.00367565	0.00366698	0.00933635	0.0115551	0.0104233	0.00416093	0.00689234	0.0141547	0.00908486	0.0174757	0.00544422	0.0078959	0.00360332	0.00606537	0.00778603	0.00571317	0.00742046	0.00777483	0.0051103	0.0159686	0.00724249	0.00149363	0.00705741	0.00791278	CWF19L1
1469	8.52236e-26	3.91968e-25	0.0166634	0.0143279	0.0132312	0.005583	0.0173221	0.0142594	0.00672058	0.00545096	0.00957976	0.0199194	0.0153541	0.0186008	0.00291881	0.0166634	0.01196	0.013927	0.0178787	0.0124909	0.0133843	0.00896071	0.0133822	0.00150815	0.00924127	0.0109865	0.0179141	0.0120232	0.0635694	0.0129584	0.00187413	0.0115995	0.0127033	STRADA
1497	5.3148e-14	1.62783e-13	0.00777921	0.00917427	0.0088982	0.00867017	0.0039947	0.00405067	0.0118305	0.00242893	0.00240346	0.00440119	0.00343382	0.00429715	0.00322659	0.00777921	0.0118713	0.00901809	0.00595506	0.0059808	0.0108994	0.00603223	0.00888492	0.000957707	0.00627527	0.00594103	0.00549233	0.00922356	0.00245127	0.00725931	0.000490769	0.00628138	0.00608914	LTA
1514	7.00321e-29	3.53566e-28	0.0198692	0.00591192	0.0107495	0.015517	0.0121512	0.00803251	0.00798281	0.00204459	0.0297498	0.019976	0.0267865	0.0236747	0.00639909	0.0198692	0.0169594	0.011978	0.0197489	0.00118475	0.0146227	0.00396582	0.00922774	0.0128212	0.00808108	0.0161343	0.00850335	0.00710286	0.000390663	0.00280313	0.00257859	0.0176403	0.0185559	PTDSS1
1555	1.4328e-28	7.16039e-28	0.0160704	0.0159065	0.0144553	0.00874003	0.00400262	0.00305824	0.0143768	0.00375131	0.00710441	0.00508813	0.00215992	0.00560504	0.00271348	0.0160704	0.00730668	0.0177902	0.037455	0.00919592	0.0145924	0.00788606	0.0127871	0.0142737	0.00609042	0.0137453	0.0189734	0.0117219	0.0198124	0.0096616	0.00266833	0.0127714	0.0128455	ZNF675
1591	1.09826e-20	4.27053e-20	0.0140349	0.0142094	0.0175493	0.0175917	0.0247309	0.0145094	0.0166845	0.0103196	0.0176766	0.031012	0.0210652	0.0346863	0.00929645	0.0140349	0.0200233	0.0204859	0.00502032	0.0090843	0.0113095	0.00357449	0.00751124	0.0142421	0.0105461	0.0104417	0.0200277	0.0136792	0.0111167	0.0046577	0.0116681	0.0114138	0.0155329	ZNF581
1642	1.78094e-28	8.87375e-28	0.0141127	0.0107951	0.0125578	0.0111578	0.00284709	0.00403821	0.00633719	0.00226903	0.00873203	0.00486246	0.01035	0.00932275	0.000687235	0.0141127	0.0199501	0.0155961	0.00818823	0.0112971	0.0096738	0.00418466	0.0100009	0.0291477	0.00572312	0.0150475	0.0157678	0.0105816	0.0143585	0.0117777	0.00161201	0.0120481	0.0190057	AP1M1
1650	1.26161e-09	3.28867e-09	0.0114093	0.00198244	0.00923701	0.0114093	0.00556144	0.00389416	0.0143497	0.010551	0.00585984	0.0148533	0.0173805	0.0165374	0.00310757	0.00487169	0.0159467	0.017921	0.0849771	0.0174956	0.0119086	0.009815	0.00402775	0.0283567	0.00770749	0.00306943	0.0295125	0.0135513	0.0401243	0.0109227	0.00152336	0.000431812	0.0209428	RPL39L
1687	5.96658e-24	2.59913e-23	0.0170823	0.0127639	0.0128936	0.0129363	0.0085286	0.0057158	0.00770963	0.00613728	0.00115892	0.00825877	0.00730007	0.00638426	0.00423946	0.0170823	0.0258543	0.019311	0.0162152	0.00720019	0.013288	0.00863775	0.0105956	0.0364255	0.0130769	0.0117522	0.0105617	0.00856942	0.00350904	0.0123726	0.00369391	0.00979316	0.0147574	HELQ
1703	9.01218e-09	2.27838e-08	0.00729992	0.00663713	0.00780299	0.00531371	0.00532365	0.00354181	0.0107732	0.00336622	0.00611839	0.00569916	0.00925476	0.0060143	0.0026435	0.00729992	0.00321626	0.0069921	0.00749669	0.00412173	0.00482595	0.00406211	0.00690486	0.00753601	0.00826927	0.00608772	0.00603149	0.00603467	0.0536043	0.00649522	0.00495662	0.0066817	0.00619273	DOK7
1709	6.5326e-21	2.56276e-20	0.0145324	0.0119053	0.0116388	0.000918074	0.00894775	0.0032742	0.00687428	0.00645163	0.00589897	0.00992509	0.00868014	0.00995768	0.00644042	0.0145324	0.0128661	0.0187521	0.030473	0.0112621	0.0144459	0.0124467	0.00956802	0.0198266	0.00955937	0.0142681	0.0113048	0.00461285	0.0156443	0.0124452	0.00278527	0.0117957	0.0147836	EDRF1
1799	1.80721e-14	5.62664e-14	0.00842111	0.00844676	0.00879631	0.00687163	0.0170834	0.0138621	0.00929342	0.00338747	0.00615205	0.0184494	0.0178266	0.0186231	0.00335377	0.00842111	0.00364827	0.00966906	0.0203709	0.003089	0.00836511	0.00589417	0.0064802	0.00154625	0.00149641	0.00730515	0.00982552	0.00768762	0.0128528	0.00580115	0.00577425	0.0061878	0.00568846	UBR5-AS1
1818	2.09264e-12	6.04087e-12	0.00764036	0.00889932	0.00865161	0.00878761	0.00401424	0.00539442	0.00866431	0.00564733	0.00867857	0.00334952	0.00289574	0.00335736	0.0057532	0.00707743	0.00819314	0.0103614	0.0106616	0.00390963	0.0083691	0.00435255	0.00764036	0.0112131	0.00192747	0.00573768	0.00390367	0.0081441	0.0238904	0.00546596	0.00105706	0.00383402	0.00742474	AP003774.4
1875	8.41551e-17	2.85465e-16	0.0100045	0.00847534	0.00755159	0.00772028	0.00665215	0.00698172	0.00709565	0.00622708	0.0072333	0.0092947	0.00518361	0.00864243	0.00481224	0.0100045	0.0159635	0.0132347	0.0190456	0.00738964	0.0132445	0.00882422	0.0103444	0.0191903	0.00312522	0.0105893	0.0109032	0.00528812	0.0166889	0.0111544	0.00253149	0.0099758	0.0139129	TOE1
1933	1.78823e-24	7.8954e-24	0.0170187	0.0179839	0.0160421	0.0140554	0.0179704	0.013759	0.0148514	0.00851535	0.00971554	0.0180375	0.029967	0.0181832	0.00286801	0.0170187	0.00399925	0.0194616	0.0108126	0.0113984	0.0149376	0.00701708	0.015219	0.00787841	0.00943088	0.0151575	0.0148725	0.0133116	0.00642802	0.0136925	0.00214038	0.0122665	0.017375	C3orf38
2066	1.34519e-15	4.37797e-15	0.0083939	0.0104372	0.0104758	0.00904136	0.0041176	0.00408256	0.0119279	0.00659598	0.00593626	0.00423767	0.00543743	0.00433287	0.00300783	0.0083939	0.014575	0.0113124	0.0132691	0.00793511	0.0142894	0.00562496	0.00939614	0.000525684	0.00599352	0.00905925	0.00813318	0.00907687	0.0067309	0.00847205	6.63176e-05	0.00712963	0.0081811	LINC00954
2094	1.23247e-16	4.15799e-16	0.00997857	0.0088354	0.00938563	0.00628855	0.00569282	0.00528129	0.00898046	0.00629	0.00686639	0.00565214	0.00553596	0.00581286	0.00520527	0.00997857	0.00925389	0.0112397	0.0169621	0.0060781	0.008247	0.00138855	0.00784551	0.0111917	0.0042023	0.00704104	0.0114219	0.00918375	0.0137924	0.00845513	0.0053707	0.00752565	0.0083259	MAN2B1
2130	2.76836e-09	7.12058e-09	0.00556622	0.00778821	0.00814328	0.00723661	0.00334273	0.00352115	0.00899318	0.0018394	0.000665054	0.00312643	0.00323297	0.00193011	0.00126639	0.00556622	0.00882154	0.011454	0.0184869	0.00498888	0.00846754	0.00450097	0.00675785	0.000328945	0.00555085	0.00551413	0.0115491	0.00822834	0.0559721	0.00604275	0.00449933	0.00463363	0.00491135	ZNF860
2138	2.73862e-09	7.04786e-09	0.00632404	0.00627298	0.00466949	0.00467902	0.00253145	0.00335656	0.00131899	0.00258678	0.00636539	0.00236834	0.0036256	0.0028041	0.00324182	0.00632404	0.00750562	0.00637843	0.00319585	0.00500368	0.00324894	0.00528611	0.00407843	0.0150091	0.00422384	0.00504572	0.00160818	0.00494306	0.00197121	0.00549784	0.00144777	0.0054131	0.00656748	ZNF484
2189	2.37888e-05	5.33236e-05	0.00615609	0.00356011	0.00313561	0.0017106	0.00274362	0.00379234	0.00239691	0.00394175	0.00440884	0.00157697	0.00596852	0.00246013	0.00501859	0.00352393	0.00574699	0.00537889	0.0158422	0.00214572	0.00505798	0.00405024	0.00245763	0.00253533	0.00271351	0.00615609	0.00464816	0.00296231	0.0384645	0.00274477	0.000465153	0.00521727	0.0029196	AL355816.2
2201	6.30272e-07	1.49206e-06	0.0031041	0.00348593	0.00349476	0.00340831	0.00211673	0.00175983	0.00432887	0.0015976	0.000201064	0.00205707	0.00207876	0.0019849	0.00212449	0.0031041	0.00376077	0.00421321	0.00439972	0.00218011	0.00367867	0.00237014	0.00324172	0.00114799	0.00139039	0.00274962	0.00338148	0.00364796	0.00553686	0.00275772	0.00292987	0.00156337	0.00294389	LINC02413
2245	1.51438e-21	6.07237e-21	0.0107944	0.00626026	0.00667572	0.00741878	0.00564883	0.00414406	0.00855357	0.00659818	0.00295693	0.0066383	0.00680623	0.00757504	0.00932113	0.0107944	0.0142444	0.00980946	0.0150535	0.00562077	0.0137505	0.00261139	0.00832284	0.00223305	0.00454939	0.0098425	0.00324418	0.00541212	0.00655412	0.00418867	0.000160414	0.0102265	0.00624097	RBM34
2412	1.42003e-11	3.97835e-11	0.00931371	0.00361609	0.0041963	0.00191224	0.00725519	0.00712988	0.00344662	0.00288709	0.0090803	0.00750931	0.0090449	0.00696008	0.00240976	0.00931371	0.00665224	0.00664212	0.00810743	0.00144394	0.00525685	0.00538567	0.00377097	0.0073122	0.00517322	0.0061061	0.000976814	0.00323502	0.00142688	0.000204045	0.00307536	0.00676434	0.00573776	TAF1A
2415	1.68588e-13	5.06641e-13	0.0106278	0.00790365	0.00762194	0.0049033	0.00656953	0.00726301	0.0116362	0.00481548	0.010417	0.00835956	0.00915067	0.0083287	0.0037749	0.00831381	0.00707118	0.00940861	0.00641337	0.00487194	0.00763931	0.00411487	0.00885255	0.00886074	0.0028603	0.00740488	0.0050872	0.0106278	0.00567773	0.00382838	0.000262214	0.00462	0.00954898	BLM
2422	9.50875e-08	2.31745e-07	0.00368731	0.00298963	0.00313535	0.00310272	0.00253056	0.00234738	0.00403903	0.0025158	0.00422629	0.00245925	0.00246584	0.00237297	0.00290724	0.00286636	0.00583832	0.003759	0.00880422	0.00255294	0.00449024	0.00257948	0.00284939	0.000957707	0.0021093	0.00368731	0.0040436	0.00328281	0.00820851	0.002865	0.00305846	0.00347705	0.0033167	AP004609.1
2429	5.90194e-06	1.35204e-05	0.00963239	0.0068601	0.00642569	0.00576583	0.0056589	0.00449912	0.00627963	0.00376288	0.00151012	0.00651196	0.00545457	0.00647769	0.00279357	0.00309522	0.0125756	0.00963239	0.00486745	0.00346797	0.00961336	0.00369524	0.00441596	0.0165719	0.0050755	0.00375453	0.00664287	0.00700967	0.00206027	0.00616782	0.00353302	0.000729228	0.00455804	AL158850.1
2441	2.09949e-14	6.51849e-14	0.00983662	0.0117759	0.0102791	0.00719505	0.00749407	0.00705689	0.00173458	0.00296366	0.00188508	0.00723351	0.00474761	0.00713543	0.00101966	0.00983662	0.00987752	0.011751	0.00123346	0.00371006	0.00890136	0.0062476	0.00934714	0.000700194	0.00520274	0.00714738	0.00578562	0.00039192	0.00133625	0.00778583	0.00351861	0.00639772	0.00691158	ZNF441
2471	1.58387e-09	4.11398e-09	0.00754467	0.00707973	0.00710489	0.00676431	0.00574593	0.00333661	0.00477252	0.00385	0.00264198	0.00563816	0.00500044	0.00549807	0.00309658	0.00754467	0.0165457	0.00957997	0.00411193	0.00256774	0.00870678	0.000939276	0.0060641	0.0286077	0.00550128	0.00538336	0.00294445	0.00614745	0.00183086	0.00610304	0.00439724	0.00456152	0.00640771	NIPSNAP3B
2635	2.02359e-07	4.87411e-07	0.0049605	0.00544647	0.00517673	0.00423765	0.00478972	0.00470877	0.00541572	0.00230962	0.00901107	0.0047831	0.00753202	0.00496418	0.00290572	0.0042797	0.00417516	0.00522842	0.00403456	0.00253492	0.00303034	0.00395054	0.0049605	0.0103789	0.00496494	0.00281355	0.00177837	0.00525694	0.00191347	0.00439858	0.00262622	0.00296734	0.00556246	DPF3
2735	1.69676e-16	5.69858e-16	0.0123154	0.0116512	0.0123558	0.00729211	0.0125853	0.0114771	0.0129684	0.00267058	0.0166324	0.0146826	0.0209483	0.0146202	0.001076	0.0117741	0.0117173	0.0141392	0.00113259	0.0063262	0.00975265	0.00333338	0.0102034	0.00909644	0.00390991	0.0123154	0.00693033	0.00797701	0.00511442	0.00824307	0.00260391	0.0106194	0.0129753	ZNF143
2938	2.8793e-07	6.90102e-07	0.00413807	0.00473977	0.00483019	0.00402232	0.00299926	0.00200854	0.00370162	0.00136942	0.00192004	0.00364794	0.00371181	0.00284778	0.00153008	0.00413807	0.0052004	0.0060872	0.00274033	0.00281176	0.00399315	0.00292904	0.00421048	0.00380786	0.00321315	0.0036547	0.00408786	0.00301939	0.00462978	0.00406932	0.00198844	0.00309178	0.0040338	AC245060.6
2974	2.183e-10	5.84631e-10	0.00770038	0.00457652	0.00315859	0.000754247	0.00536134	0.0045548	0.0052888	0.00294525	0.00520962	0.00722651	0.011129	0.00877578	0.00236404	0.00770038	0.00972254	0.00889988	0.0112734	0.0020115	0.00738316	0.00512373	0.00347037	0.0114041	0.00239716	0.00611808	0.0016054	0.00395946	0.0163351	0.00561404	0.000719196	0.00547636	0.00712467	MTERF1
3224	3.36746e-07	8.05376e-07	0.00480637	0.00367675	0.00315161	0.00394925	0.00455667	0.00408185	0.00304641	0.00259071	0.000432717	0.00449916	0.0023675	0.00435319	0.00443591	0.00480637	0.00260083	0.00533369	0.00790701	0.00388238	0.00538727	0.00353708	0.00321508	0.00942185	0.003968	0.00366635	0.00338836	0.00196933	0.00455271	0.00384711	0.00355837	0.00406524	0.00496032	DZANK1
3308	2.67863e-15	8.61982e-15	0.0145776	0.0160653	0.0157278	0.0075634	0.00446881	0.00604111	0.00891647	0.0053286	0.0179253	0.00526952	0.0106521	0.00515466	0.00233308	0.0107977	0.0149504	0.0196053	0.0095408	0.00772675	0.0175463	0.0071576	0.0145776	0.0109319	0.00764094	0.0102106	0.00886799	0.00755339	0.0138723	0.00888881	0.00113731	0.010023	0.0143311	S100PBP
3621	1.14519e-07	2.78395e-07	0.00525214	0.00558578	0.00551469	0.00471626	0.00332328	0.00305691	0.007693	0.00197941	0.00164844	0.00337442	0.00171885	0.00321588	0.000667259	0.00302683	0.0129518	0.0065884	0.00735208	0.00152135	0.00897469	0.00238291	0.00525214	0.0031935	0.00231887	0.00289197	0.00305859	0.00568012	0.00379617	0.00348968	0.00305777	4.21895e-05	0.00397934	TXLNB
3706	0.000761113	0.00161038	0.00464818	0.00559483	0.00476027	0.0029328	0.00785694	0.00433179	0.00420155	0.00579907	0.00231171	0.0098973	0.0114033	0.0104506	0.00358434	0.00414473	0.00163631	0.00220725	0.0202653	0.0136992	0.00201654	0.00452992	0.00464818	0.00101711	0.00582118	0.00428494	0.0225693	0.00727899	0.120674	0.0125837	0.00299275	0.00404503	0.00599863	LILRA4
3831	4.52698e-06	1.04132e-05	0.0033216	0.00367643	0.00367114	0.00335212	0.00305512	0.00317879	0.0049534	0.00164201	0.000608374	0.00305475	0.00284864	0.00292585	0.00273172	0.00320497	0.00574622	0.00365722	0.00404779	0.00353876	0.00749007	0.00306618	0.00345974	0.000627273	0.000705395	0.00296736	0.00143709	0.00312475	0.00225375	0.00349183	0.00125023	0.0033216	0.00423828	AP000787.1
3931	1.62306e-07	3.92629e-07	0.0071519	0.00596452	0.0071519	0.00608477	0.00817323	0.00739342	0.0050451	0.0066831	0.00847533	0.00714313	0.00347662	0.00550614	0.00547401	0.00424649	0.0047653	0.00591014	0.00939256	0.00716409	0.00498875	0.0029657	0.00598531	0.00420163	0.00526854	0.003306	0.010721	0.00508315	0.00201952	0.00814456	0.00048457	0.00383433	0.00628273	PDCD4-AS1
4387	0.000213189	0.000461257	0.00170126	0.00268849	0.0014243	0.00201348	0.00453268	0.00587988	0.0068646	0.00202515	0.00722112	0.00400555	0.00540792	0.00430821	0.00160547	0.00170126	0.00714369	0.00422401	0.00600739	0.00296331	0.00618656	0.00322922	0.00228488	0.00412018	0.00329652	0.00200272	0.00655399	0.00524741	0.00341459	0.00163414	0.00144842	0.00366678	0.00410216	C7orf31
4503	0.0054834	0.0111607	0.00250422	0.00179559	0.00211339	0.000485043	0.0017441	0.00151735	0.0012258	0.00216314	0.00133022	0.00162692	0.00194538	0.00182266	0.00216615	0.00250422	0.00489261	0.00317149	0.00405844	0.00091423	0.0015966	0.000724416	0.00188863	0.0100868	0.00359274	0.00129656	0.00190927	0.00154565	0.000210205	0.00229667	0.000545683	0.00199359	0.00250193	DIABLO

## Sheet: 4
Top	p.value	FDR	summary.logFC	logFC.1	logFC.2	logFC.3	logFC.5	logFC.6	logFC.7	logFC.8	logFC.9	logFC.10	logFC.11	logFC.12	logFC.13	logFC.14	logFC.15	logFC.16	logFC.17	logFC.18	logFC.19	logFC.20	logFC.21	logFC.22	logFC.23	logFC.24	logFC.25	logFC.26	logFC.27	logFC.28	logFC.29	logFC.30	logFC.31	GeneName
1	0	0	2.73754	1.56819	0.899607	2.56225	2.55456	2.61051	2.93581	2.67824	2.09998	2.45218	2.12134	2.27842	2.70527	2.60306	3.02376	0.602496	2.88029	2.21795	2.73868	2.59873	2.44858	2.87078	2.63522	2.81912	2.31046	2.72453	2.8406	2.59285	2.73754	2.79169	2.5499	MUC5AC
2	0	0	1.44102	1.0092	0.715287	1.28455	1.58852	1.48708	1.59333	1.45753	0.681556	1.49779	1.06359	1.28203	1.44159	1.35132	2.05718	0.471527	1.51269	1.16294	1.40582	1.27705	1.06629	1.32725	1.38591	1.54508	1.38443	1.35797	1.45265	1.2842	1.44102	1.53968	1.36504	MUC1
2	0	0	1.25477	0.834712	0.495477	1.41815	1.45053	1.54768	1.44876	1.03807	0.82223	1.396	1.10653	1.27262	1.00967	1.20078	1.74169	0.204119	1.80378	1.23282	1.59637	1.2739	1.0922	0.881772	1.05516	1.06514	1.52255	1.10979	1.70202	1.13009	1.25477	1.05373	1.65159	MUCL3
2	0	0	0.292706	0.250237	0.212713	0.348183	0.379423	0.389379	0.462509	0.18599	0.400623	0.336787	0.229211	0.260195	0.179434	0.327081	0.492457	0.127021	0.376929	0.220151	0.403775	0.292706	0.252652	0.156896	0.238998	0.240035	0.266284	0.252674	0.31688	0.207247	0.280312	0.228284	0.345332	SLC5A5
8	0	0	0.438751	0.349069	0.316748	0.198377	0.136209	0.142806	0.315885	0.368949	0.100536	0.106597	0.0563474	0.0715348	0.349493	0.317122	0.364635	0.217915	0.750536	0.49424	0.451982	0.273741	0.37264	0.401719	0.326987	0.438751	0.613964	0.436402	0.699635	0.459145	0.36669	0.428611	0.396135	PSAPL1
9	0	0	0.215842	0.133945	0.0951669	0.201692	0.127453	0.150145	0.170315	0.214126	0.195214	0.125422	0.159793	0.135419	0.203861	0.216529	0.206474	0.0648023	0.302324	0.209675	0.191649	0.203981	0.179267	0.201093	0.222058	0.22053	0.18707	0.210373	0.283263	0.204598	0.215842	0.219621	0.235355	RASEF
12	0	0	0.667075	0.313426	0.205924	0.636934	0.557853	0.587533	0.682828	0.601965	0.351495	0.531801	0.282719	0.431485	0.625589	0.656445	0.310622	0.0760359	0.697485	0.431568	0.495818	0.609253	0.349129	0.565667	0.599885	0.66142	0.564637	0.5492	0.623653	0.49895	0.667075	0.653232	0.672612	VSIG2
13	0	0	0.302299	0.139239	0.108626	0.331998	0.218182	0.239475	0.268542	0.209722	0.258449	0.209856	0.237985	0.216904	0.215878	0.286868	0.343181	0.0958647	0.339889	0.188837	0.253877	0.295226	0.175733	0.208326	0.153689	0.249064	0.126341	0.223807	0.28966	0.191366	0.302299	0.255307	0.347842	MLPH
13	0	0	1.0404	0.616145	0.393935	0.999252	1.47988	0.486869	1.33003	1.35652	0.159548	1.58596	2.2688	1.69611	1.31776	1.84781	1.08108	0.648014	0.328647	0.228313	0.752903	0.966954	0.35946	1.27809	0.837044	1.81444	0.0835642	0.683715	0.133004	0.429306	1.0404	1.6989	1.51604	MT-ND4
15	0	0	0.484122	0.484122	0.329234	0.612347	0.66353	0.230188	0.788876	0.638599	0.220909	0.689848	0.926118	0.670549	0.726238	0.949466	0.631104	0.487686	0.0985068	0.208349	0.539477	0.603039	0.407187	0.721051	0.597663	0.855687	0.202194	0.495685	0.0211874	0.466185	0.551488	0.801801	0.835408	MT-ND5
16	1.04306e-245	5.6789e-244	0.855343	0.187949	0.195812	0.28765	0.378166	0.379153	0.500429	0.143126	0.372332	0.370314	0.417736	0.382806	0.115359	0.256676	0.855343	0.142028	0.232227	0.148792	0.450946	0.200872	0.157449	0.0384146	0.173273	0.153975	0.191905	0.166792	0.192542	0.140142	0.170571	0.14168	0.259287	DUOX2
17	0	0	0.458401	0.294901	0.226568	0.480155	0.196533	0.24189	0.328885	0.394951	0.314478	0.217063	0.223368	0.225814	0.402847	0.464728	0.380625	0.202664	0.34798	0.268721	0.365038	0.44344	0.381801	0.435104	0.388253	0.425713	0.259592	0.400741	0.273251	0.346744	0.458401	0.432517	0.426829	CAPN8
17	1.327e-295	9.44904e-294	0.386101	0.154065	0.164445	0.549876	0.290038	0.398348	0.296309	0.196489	0.638749	0.332737	0.442191	0.394399	0.190973	0.432873	0.502487	0.214328	0.561009	0.278362	0.375767	0.386101	0.219684	0.103541	0.276944	0.256922	0.364435	0.221968	0.512884	0.225799	0.348479	0.24765	0.571	ANKRD36C
17	0	0	0.468603	0.22412	0.178055	0.566278	0.204709	0.263227	0.438659	0.233896	0.578781	0.211636	0.181765	0.181929	0.199487	0.483486	0.383739	0.168862	0.563326	0.312204	0.491579	0.468603	0.315307	0.181628	0.309841	0.313667	0.260647	0.343033	0.47484	0.312286	0.389512	0.309344	0.591956	SYTL2
19	0	0	0.182257	0.155237	0.120448	0.171504	0.116467	0.121773	0.200347	0.160282	0.0991524	0.106001	0.0732534	0.0740094	0.160429	0.170616	0.183811	0.0706731	0.252699	0.155186	0.220861	0.156436	0.171965	0.179309	0.156982	0.178123	0.19195	0.164893	0.226685	0.153146	0.182257	0.178617	0.213733	B4GALNT3
20	2.4177e-203	1.04491e-201	0.0862534	0.0856012	0.0640596	0.0593736	0.0622526	0.0567836	0.0890396	0.0831752	0.0232207	0.0513667	0.0249367	0.0324922	0.0886426	0.0696623	0.0842409	0.0357864	0.119468	0.0833974	0.0931431	0.0663762	0.0942008	0.106096	0.0725774	0.0902565	0.0747512	0.09003	0.120253	0.080537	0.0862534	0.0919905	0.0859371	LGALS9B
22	0	0	0.304732	0.263112	0.230628	0.302644	0.348148	0.32183	0.248418	0.265442	0.289679	0.375423	0.327519	0.277616	0.242166	0.276734	0.446297	0.104424	0.318639	0.0919743	0.279425	0.304732	0.254907	0.217223	0.306511	0.248491	0.117335	0.233888	0.230038	0.247943	0.273587	0.230993	0.32818	CEACAM5
23	0	0	0.361536	0.26268	0.242107	0.357699	0.39944	0.417694	0.382267	0.371451	0.217766	0.346002	0.269891	0.233514	0.356066	0.350507	0.333224	0.263382	0.302255	0.227561	0.345192	0.343993	0.299777	0.310116	0.337071	0.390551	0.254203	0.342098	0.281577	0.272416	0.361536	0.388714	0.366005	LIPH
23	0	0	0.46514	0.286332	0.249024	0.511091	0.26476	0.3089	0.435569	0.363042	0.371063	0.250565	0.213481	0.20707	0.362714	0.486887	0.410261	0.271343	0.276774	0.232076	0.482903	0.469647	0.360587	0.368158	0.400349	0.430235	0.344357	0.392914	0.212412	0.319065	0.46514	0.427954	0.517282	CYP3A5
23	4.22628e-283	2.79018e-281	0.163782	0.145121	0.109795	0.105443	0.102595	0.10236	0.141233	0.156129	0.0678181	0.0947118	0.0681749	0.0771411	0.158123	0.144697	0.182401	0.0535162	0.173486	0.138647	0.157111	0.12862	0.163782	0.182799	0.164107	0.168576	0.165376	0.170695	0.170662	0.169091	0.115104	0.170008	0.147553	OASL
23	8.24905e-209	3.64982e-207	0.799353	0.136982	0.148478	0.18906	0.341109	0.305756	0.397435	0.100032	0.445145	0.378098	0.505676	0.467378	0.065172	0.146549	0.799353	0.118071	0.15712	0.102619	0.334393	0.13445	0.104441	0.00720281	0.119265	0.0827378	0.148519	0.109707	0.12183	0.0938722	0.111179	0.0687675	0.17476	DUOXA2
26	0	0	0.340927	0.0755839	0.0547629	0.349362	0.126964	0.16071	0.256862	0.342403	0.197802	0.114262	0.100351	0.105109	0.332506	0.360385	0.173014	0.0660673	0.18592	0.147613	0.267002	0.34495	0.175676	0.310037	0.33118	0.382767	0.239693	0.297137	0.173365	0.206178	0.340927	0.385414	0.32274	ARL14
27	0	0	0.403074	0.201415	0.135962	0.225998	0.152922	0.0836557	0.229413	0.39571	0.0490468	0.192659	0.200628	0.19986	0.384243	0.287177	0.290055	0.103418	0.198839	0.237315	0.243302	0.286192	0.271025	0.432963	0.355018	0.403074	0.251566	0.345262	0.208864	0.306984	0.320578	0.394253	0.238596	LAMB3
27	1.89928e-185	7.40675e-184	0.0873175	0.0847822	0.0651826	0.0696819	0.068308	0.0613525	0.0953421	0.0874832	0.0386142	0.05166	0.0276544	0.0231708	0.0904736	0.0853624	0.0966161	0.0402027	0.114926	0.0908433	0.101535	0.0777489	0.0921397	0.101771	0.0848661	0.0996179	0.0910395	0.0982452	0.106725	0.0965326	0.0873175	0.101231	0.0804707	LGALS9C
31	0	0	0.393048	0.219278	0.185348	0.404375	0.379576	0.294805	0.313255	0.357427	0.179841	0.403728	0.439795	0.436494	0.037236	0.407011	0.440122	0.155575	0.186689	0.186681	0.405911	0.363219	0.157479	0.136159	0.388485	0.390961	0.323917	0.17072	0.146158	0.250445	0.393048	0.378678	0.444404	LGALS3BP
31	2.77817e-144	7.54448e-143	0.220248	0.101235	0.105964	0.129583	0.199796	0.162665	0.163171	0.0658765	0.142299	0.224294	0.279177	0.242204	0.0672411	0.127233	0.324715	0.0977661	0.308763	0.141737	0.220248	0.117503	0.103724	0.050059	0.113369	0.101401	0.223808	0.106689	0.312041	0.116181	0.125685	0.0939115	0.220724	APOL1
32	0	0	0.327478	0.103057	0.0398754	0.23464	0.162945	0.203407	0.135004	0.308527	0.117432	0.14938	0.017662	0.0403422	0.307777	0.301831	0.184696	0.0432381	0.2365	0.201364	0.293198	0.251587	0.202627	0.0891296	0.31998	0.327478	0.201051	0.0926077	0.185459	0.189943	0.280504	0.325821	0.368342	RAB11FIP1
34	0	0	0.300956	0.0660565	0.0191485	0.358192	0.125518	0.173965	0.23224	0.212004	0.262466	0.127752	0.105047	0.094117	0.218422	0.318486	0.188939	0.06236	0.256532	0.155437	0.273708	0.304896	0.189141	0.220196	0.244961	0.263297	0.239908	0.249051	0.24094	0.194174	0.300956	0.267449	0.33113	SULT1C2
34	3.37584e-187	1.33199e-185	0.220448	0.0775756	0.0572792	0.157687	0.0470077	0.0439663	0.134079	0.0596471	0.124669	0.0632529	0.078356	0.0711603	0.0720898	0.166028	0.113151	0.0271151	0.290583	0.118811	0.199249	0.121975	0.103482	0.0564814	0.110804	0.110057	0.205573	0.118689	0.260834	0.124665	0.13193	0.101006	0.220448	DDX60
39	1.51376e-146	4.22015e-145	0.104541	0.0511629	0.0452135	0.117165	0.0381989	0.0522792	0.0977503	0.0420117	0.129605	0.0439744	0.0478773	0.0447202	0.0381675	0.102512	0.109219	0.0462252	0.12333	0.0618913	0.105252	0.104541	0.0653144	0.0320049	0.0699909	0.064221	0.0718974	0.0633504	0.100887	0.0620848	0.0890847	0.0607146	0.121788	FSIP2
40	0	0	0.28234	0.157039	0.102039	0.251216	0.266533	0.254307	0.282711	0.258856	0.131335	0.270949	0.259721	0.253567	0.267784	0.264135	0.3718	0.0655221	0.197747	0.12296	0.249364	0.265377	0.176986	0.247404	0.26239	0.281023	0.175877	0.242773	0.206564	0.21018	0.28234	0.277791	0.288035	SLC44A4
40	1.08659e-134	2.71752e-133	0.11663	0.0510346	0.0452926	0.142153	0.0475958	0.0561934	0.0986658	0.0498625	0.170009	0.0485293	0.0511886	0.0449636	0.0467231	0.11663	0.0883103	0.0466608	0.151935	0.0704263	0.127368	0.12464	0.0742474	0.0353066	0.0687521	0.074411	0.0813961	0.074614	0.129568	0.0635187	0.114121	0.0719232	0.160266	FMN1
40	0	0	0.197412	0.150265	0.0969613	0.156631	0.216168	0.214493	0.251579	0.200822	0.209174	0.213215	0.195773	0.207605	0.187534	0.174679	0.346286	0.0236723	0.160378	0.137569	0.239051	0.164565	0.187065	0.199542	0.185708	0.196034	0.190298	0.204211	0.2111	0.172814	0.197412	0.191379	0.210681	CYP2S1
41	1.85014e-128	4.38827e-127	0.0765004	0.0247509	0.021253	0.110407	0.071072	0.0855156	0.100585	0.043487	0.0802601	0.0708597	0.0474596	0.0524183	0.0449862	0.0925927	0.0923992	0.0214963	0.105451	0.0520878	0.0966926	0.0765004	0.0489356	0.0360384	0.0544544	0.0591804	0.0734705	0.0631324	0.0987118	0.0484207	0.0797432	0.0610519	0.111186	LYPD6B
41	0	0	0.276097	0.248598	0.187699	0.241651	0.264851	0.236027	0.288784	0.273732	0.204015	0.262006	0.255808	0.248008	0.269232	0.260992	0.324135	0.0767376	0.197254	0.174466	0.270413	0.251413	0.269215	0.300937	0.26431	0.282285	0.226076	0.275449	0.151506	0.251375	0.276097	0.281257	0.267089	VILL
43	0	0	0.220179	0.0794911	0.0525087	0.239686	0.0733941	0.092609	0.189872	0.0778758	0.107526	0.0666979	0.0191126	0.0333256	0.139454	0.224343	0.224421	0.0298177	0.140843	0.0778111	0.204807	0.204956	0.139408	0.118937	0.180959	0.193903	0.104885	0.122423	0.105122	0.130083	0.220179	0.19398	0.259417	CTNND1
44	0	0	0.330737	0.182126	0.136352	0.342413	0.403408	0.352079	0.281661	0.269985	0.248618	0.398285	0.21803	0.363524	0.212784	0.309069	0.307678	0.134336	0.282653	0.258842	0.333798	0.247784	0.260375	0.242605	0.16229	0.362505	0.292684	0.169842	0.186997	0.298573	0.330737	0.363368	0.456015	SQSTM1
44	2.86467e-147	8.03304e-146	0.112862	0.0240249	0.0272893	0.0175522	0.0909642	0.111322	0.132757	0.0640076	0.120201	0.0995345	0.105033	0.0960164	0.0154528	0.127865	0.105328	0.0399263	0.107458	0.0627973	0.101755	0.0840891	0.0253459	0.0500575	0.0827159	0.0730391	0.0736955	0.0632606	0.0890473	0.0576043	0.112862	0.0686686	0.131508	ADAM28
47	8.26209e-271	5.09364e-269	0.143395	0.0705985	0.0342203	0.139641	0.115441	0.124171	0.150521	0.121655	0.137451	0.112873	0.113802	0.104468	0.124876	0.148089	0.144903	0.0244573	0.154114	0.0899505	0.155333	0.127206	0.11134	0.133677	0.120377	0.14942	0.126303	0.139587	0.15177	0.118853	0.143395	0.149778	0.148866	SLC9A1
47	7.13522e-276	4.51511e-274	0.174984	0.0708721	0.0416481	0.122704	0.0763187	0.111769	0.133893	0.153506	0.188007	0.0750291	0.0575371	0.0600045	0.139901	0.174984	0.116198	0.00782041	0.138624	0.11086	0.186216	0.160207	0.127909	0.106936	0.155079	0.172045	0.137391	0.113242	0.0995279	0.145	0.137906	0.167694	0.174589	FAM102A
47	1.04317e-278	6.70226e-277	0.380075	0.0961187	0.0880411	0.181144	0.0953995	0.0746347	0.120145	0.0434933	0.342964	0.134673	0.211463	0.15394	0.0643064	0.250254	0.207068	0.127649	0.253074	0.0926464	0.180397	0.224824	0.119852	0.0723614	0.121889	0.150459	0.114659	0.0501716	0.185263	0.104	0.13938	0.13494	0.380075	SRRM2
51	0	0	0.266106	0.166042	0.143377	0.261292	0.165799	0.134798	0.0089454	0.218726	0.149025	0.194986	0.201545	0.185114	0.169256	0.272539	0.235765	0.115889	0.240663	0.16622	0.306508	0.224325	0.211438	0.200232	0.214222	0.261995	0.18658	0.203509	0.252003	0.214145	0.266106	0.257024	0.326048	SPATS2L
52	0	0	0.195494	0.101182	0.0543217	0.193643	0.188723	0.190779	0.130139	0.173131	0.129638	0.183683	0.192361	0.18698	0.171617	0.215193	0.20225	0.0155583	0.150193	0.101336	0.192544	0.171761	0.143122	0.129074	0.168073	0.20882	0.110168	0.10832	0.104272	0.157059	0.195494	0.199202	0.200649	ABHD2
54	3.24687e-184	1.25309e-182	0.216933	0.113313	0.0937106	0.167312	0.0953748	0.0878452	0.15281	0.112192	0.132775	0.0854561	0.0754768	0.0605798	0.0621612	0.169787	0.139089	0.107551	0.172542	0.120879	0.152864	0.131442	0.143331	0.145335	0.105059	0.162394	0.122299	0.146151	0.168529	0.131679	0.118307	0.157967	0.216933	TLE4
54	0	0	0.150208	0.0716038	0.039444	0.11789	0.0864172	0.10002	0.0854131	0.143701	0.0869424	0.0854259	0.0657072	0.0718691	0.143993	0.13301	0.146637	0.00154695	0.20815	0.126727	0.150657	0.12727	0.104379	0.166518	0.13937	0.164983	0.140745	0.156303	0.194427	0.134535	0.150208	0.163996	0.148727	RFLNA
55	1.53614e-210	6.89681e-209	0.128329	0.0593825	0.0450469	0.141234	0.113319	0.0990045	0.126224	0.0925843	0.0890374	0.118337	0.12807	0.124215	0.0912013	0.133636	0.109081	0.0583341	0.141476	0.0616157	0.105803	0.133206	0.0543714	0.0817467	0.107642	0.106347	0.0201578	0.101047	0.132638	0.0795803	0.128329	0.103649	0.149231	ERN2
59	0	0	0.267887	0.186251	0.102687	0.265398	0.228663	0.212511	0.278507	0.290841	0.16025	0.235745	0.182834	0.198275	0.287041	0.28825	0.361732	0.0236014	0.230046	0.18659	0.310584	0.149879	0.253537	0.267691	0.287586	0.301608	0.241923	0.242315	0.187807	0.25851	0.267887	0.295464	0.361406	EFHD2
61	1.09678e-301	7.92752e-300	0.195164	0.112177	0.066616	0.207897	0.144692	0.157248	0.236916	0.164565	0.0733667	0.135372	0.082598	0.10285	0.167302	0.219631	0.205099	0.0423243	0.162822	0.146724	0.235219	0.179714	0.145985	0.161856	0.149185	0.195164	0.152546	0.186308	0.147169	0.167442	0.179352	0.195065	0.207483	GALNT6
63	0	0	0.313892	0.169669	0.0970549	0.342486	0.180595	0.184308	0.16238	0.295402	0.141847	0.176584	0.158191	0.157396	0.227257	0.355829	0.200504	0.0799028	0.220438	0.207811	0.300932	0.275205	0.257087	0.0913507	0.206465	0.323512	0.231638	0.114842	0.150297	0.260379	0.313892	0.323584	0.327204	TENT5A
63	7.56867e-245	4.11407e-243	0.131705	0.0614265	0.0424483	0.139679	0.077503	0.0988299	0.132678	0.0925042	0.111568	0.0727348	0.079744	0.0766625	0.0887109	0.141214	0.147005	0.0263936	0.0670167	0.054379	0.127788	0.131705	0.0995769	0.0891278	0.104754	0.11294	0.0944636	0.106385	0.0905879	0.084074	0.122336	0.11036	0.130403	CYP2C18
63	0	0	0.254122	0.120897	0.0907167	0.331905	0.190591	0.144182	0.241049	0.150798	0.272811	0.184229	0.142714	0.158705	0.148951	0.268497	0.236201	0.117181	0.135032	0.0578194	0.249583	0.269682	0.164522	0.143637	0.186714	0.182107	0.10166	0.180372	0.08447	0.138221	0.254122	0.182962	0.314122	ABCC3
64	2.81142e-181	1.06422e-179	0.0986426	0.0523084	0.0394499	0.0993205	0.0844137	0.0880955	0.0971152	0.0772985	0.0883301	0.0853008	0.0792658	0.0786839	0.0764957	0.0966211	0.110059	0.0377223	0.115693	0.0749865	0.093939	0.0898193	0.0599516	0.0642584	0.0881826	0.0915467	0.0960182	0.0633603	0.123841	0.0747931	0.0986426	0.0932297	0.110908	MYRF
64	1.27355e-305	9.47061e-304	0.17429	0.145655	0.100983	0.125467	0.136977	0.131705	0.176458	0.145886	0.109191	0.144907	0.119705	0.12246	0.15853	0.168758	0.17533	0.0481043	0.181993	0.111689	0.18013	0.161537	0.17429	0.151256	0.150709	0.173399	0.0969419	0.119657	0.156836	0.153061	0.160116	0.171782	0.188339	ATP2A3
68	2.86695e-101	4.98195e-100	0.0621867	0.0249145	0.0197125	0.0701002	0.0376254	0.0440132	0.048918	0.0260256	0.0846025	0.0383919	0.0409558	0.0370375	0.0241383	0.0585006	0.0438688	0.0175977	0.077699	0.038939	0.0642183	0.0621867	0.0360166	0.0153853	0.0410343	0.0357596	0.0231352	0.0393884	0.0676674	0.039528	0.0538634	0.0334057	0.0780056	FER1L6
71	2.89179e-75	3.47118e-74	0.0552066	0.0218059	0.0175826	0.0523094	0.0336238	0.0374124	0.054103	0.0351894	0.00609929	0.031432	0.042861	0.0313461	0.0352651	0.0688334	0.0531703	0.025452	0.0728499	0.0308469	0.0551388	0.0552066	0.0225221	0.0346637	0.0440628	0.0469821	0.0399492	0.033018	0.0757192	0.0237062	0.0490827	0.0456023	0.0683739	TMEM63A
74	5.27598e-140	1.37701e-138	0.0931608	0.0308419	0.0122511	0.0868461	0.0680458	0.0648769	0.067187	0.0435325	0.0914171	0.0606217	0.0628583	0.0583366	0.0443507	0.0931608	0.0506888	0.000266219	0.104608	0.0529339	0.0863321	0.0854338	0.0508334	0.0415733	0.0776587	0.0746792	0.0491455	0.0523747	0.0851693	0.0533595	0.0810507	0.0716616	0.110241	ARHGAP12
74	0	0	0.203518	0.100899	0.061034	0.192395	0.194111	0.171287	0.200318	0.163467	0.0989296	0.195912	0.17726	0.168238	0.15536	0.186302	0.209587	0.0586902	0.222019	0.137832	0.193583	0.170538	0.136044	0.138549	0.18658	0.186794	0.188976	0.152917	0.169716	0.178451	0.203518	0.189291	0.234565	PLXNB2
77	5.54578e-253	3.09991e-251	0.123021	0.0352945	0.021889	0.117931	0.0529108	0.0637093	0.0840822	0.127034	0.0598915	0.0613418	0.0419031	0.0595652	0.125689	0.138021	0.107722	0.00822719	0.0998805	0.0687397	0.0950866	0.113538	0.0686655	0.104797	0.129237	0.13566	0.050426	0.0874547	0.074444	0.0808207	0.123021	0.129364	0.114038	KCNK1
78	2.98238e-308	2.26296e-306	0.164708	0.111218	0.0742014	0.157911	0.13522	0.121762	0.0546674	0.0965287	0.0594586	0.122388	0.0923	0.0931356	0.13943	0.157636	0.181558	0.04114	0.0702902	0.0389971	0.145309	0.167776	0.137431	0.133581	0.143822	0.153741	0.0921405	0.0775651	0.0472356	0.115923	0.164708	0.151298	0.174332	FLNB
78	2.3691e-102	4.14907e-101	0.04929	0.0396081	0.0249976	0.0414131	0.044854	0.0397751	0.044088	0.0471993	0.0141783	0.0332871	0.0199269	0.0350196	0.042057	0.0398691	0.118622	0.0120541	0.0547274	0.0369134	0.038508	0.0408339	0.0357185	0.0194571	0.041562	0.0543209	0.0109457	0.00463236	0.0493385	0.0335992	0.04929	0.0536287	0.0509793	FAM174B
79	5.08927e-269	3.10335e-267	0.126886	0.0750818	0.0484165	0.117738	0.119074	0.113032	0.133417	0.11338	0.0493607	0.101187	0.0862662	0.0677195	0.109105	0.126295	0.178462	0.0281669	0.0433988	0.0454893	0.121612	0.114021	0.0969899	0.111365	0.119832	0.124521	0.0740013	0.0917696	0.0417445	0.0809176	0.126886	0.123839	0.136765	NR2F6
84	2.57855e-195	1.06371e-193	0.0990506	0.0580857	0.0407098	0.107618	0.0860857	0.0787016	0.109207	0.0850607	0.0494419	0.0753566	0.016599	0.00359482	0.0785809	0.107421	0.0386737	0.0289516	0.126972	0.0689273	0.107447	0.0990506	0.0704825	0.0589857	0.0943184	0.0938854	0.098054	0.0812179	0.138681	0.0825708	0.0971866	0.0915499	0.115839	C1orf116
87	3.94423e-250	2.17927e-248	0.152849	0.0985344	0.075587	0.176878	0.0692648	0.0833019	0.134119	0.102028	0.17685	0.0713182	0.084761	0.0725902	0.0966375	0.160052	0.147722	0.0549596	0.162372	0.0849832	0.143824	0.144939	0.124492	0.101334	0.107449	0.127412	0.118842	0.103432	0.105914	0.0965207	0.152849	0.12759	0.178806	ABCC5
87	2.4706e-131	6.00428e-130	0.0895165	0.0570751	0.0447671	0.050345	0.0443802	0.0524384	0.0681008	0.0756807	0.0405758	0.044947	0.0407187	0.0337394	0.0762713	0.0634836	0.0839103	0.0366106	0.0611595	0.0561859	0.0683137	0.0633063	0.0659129	0.0900322	0.0687502	0.0895165	0.0374817	0.0681218	0.0686112	0.0635918	0.0706702	0.0936731	0.0591181	SGSM3
87	2.09902e-306	1.57487e-304	0.336145	0.236451	0.14817	0.323261	0.382421	0.314602	0.45581	0.360834	0.31399	0.394558	0.473944	0.42045	0.351878	0.478668	0.49936	0.190377	0.126736	0.152444	0.31137	0.291326	0.139629	0.343964	0.251475	0.437046	0.0592915	0.249747	0.0853534	0.239086	0.336145	0.416206	0.430949	MT-ND4L
91	5.79563e-90	8.68128e-89	0.074913	0.0307668	0.0224371	0.0639192	0.0427603	0.0434397	0.0536464	0.0231863	0.0115054	0.0383076	0.0258509	0.0340073	0.0318344	0.0625738	0.0527496	0.0191925	0.0772143	0.0406596	0.0692523	0.0540846	0.0352159	0.0250855	0.0349816	0.0484652	0.0265711	0.0267134	0.0586617	0.034144	0.0502381	0.0461883	0.074913	KIAA1147
92	3.0591e-306	2.29009e-304	0.170616	0.104221	0.0538686	0.111454	0.0982	0.107307	0.123842	0.0900917	0.0489248	0.0867641	0.0186411	0.0258664	0.125896	0.137042	0.167727	0.00195087	0.0709673	0.0358307	0.164454	0.12918	0.147549	0.164003	0.153091	0.168621	0.066075	0.134447	0.0986422	0.129368	0.1522	0.170616	0.165036	MAPK3
93	8.69321e-133	2.1422e-131	0.0569754	0.0513609	0.0381507	0.0378404	0.018591	0.0241506	0.0271251	0.0562667	0.0431983	0.0206532	0.0186489	0.0243765	0.0584879	0.0518848	0.0403575	0.0291733	0.0648174	0.0471269	0.0533329	0.0569754	0.0618776	0.0638568	0.0512884	0.0645368	0.0515526	0.0452931	0.0572372	0.0509443	0.0400123	0.0654742	0.0637012	BICDL1
95	4.10999e-236	2.12063e-234	0.130766	0.0712711	0.0561724	0.132095	0.112355	0.116509	0.108801	0.0849076	0.174225	0.11423	0.117598	0.112833	0.0464672	0.121869	0.12972	0.0437396	0.118031	0.0613825	0.142242	0.130766	0.0958123	0.0587022	0.10681	0.102788	0.111294	0.0814616	0.0846562	0.0883467	0.126889	0.0999944	0.168417	FBLIM1
96	5.6649e-304	4.16644e-302	0.206972	0.0629995	0.0293801	0.257212	0.16313	0.181469	0.209246	0.124428	0.227035	0.156485	0.134639	0.105772	0.139592	0.207492	0.16705	0.0206169	0.159878	0.0751844	0.188879	0.217957	0.102624	0.120414	0.160042	0.160961	0.0739253	0.157288	0.0504954	0.111501	0.206972	0.157155	0.260576	GALE
99	1.65518e-113	3.27508e-112	0.0516421	0.0540186	0.0411826	0.0370394	0.0303554	0.027927	0.0218121	0.0555062	0.0168995	0.0288131	0.0301017	0.029597	0.0559952	0.0451334	0.0353397	0.0328774	0.061663	0.0433804	0.0399141	0.0522223	0.0544836	0.0517473	0.0511354	0.0569453	0.046958	0.0243504	0.0654203	0.0530539	0.0516421	0.0567123	0.047768	GIPR
100	5.25712e-283	3.46391e-281	0.184231	0.0663466	0.0558139	0.190982	0.118467	0.120902	0.0977143	0.0996662	0.123076	0.110082	0.0709054	0.0855513	0.107743	0.161122	0.129393	0.067814	0.143553	0.0561321	0.149143	0.184231	0.0955805	0.0441298	0.12701	0.115983	0.0910297	0.0425419	0.0949739	0.0902181	0.155264	0.119369	0.227556	LLGL2
101	6.86489e-137	1.74685e-135	0.0662877	0.0162161	0.00943506	0.0709096	0.0271365	0.0329515	0.0543449	0.0251812	0.029424	0.034945	0.0431164	0.0357585	0.0388786	0.0626805	0.0492068	0.00914531	0.0618067	0.0394148	0.0502672	0.0662877	0.03115	0.0351438	0.0491139	0.0496889	0.025585	0.0470927	0.0577796	0.035292	0.0605567	0.0492414	0.0728379	MYO5C
103	4.28456e-95	6.84591e-94	0.0431922	0.00959878	0.00284666	0.0501366	0.018346	0.023546	0.0407673	0.0221497	0.0389082	0.0182518	0.0202536	0.0155138	0.0133957	0.0436595	0.0453418	0.00131581	0.0561062	0.0265114	0.0339005	0.0431922	0.0196702	0.0232243	0.0298362	0.0339744	0.0197934	0.0309692	0.0559711	0.0239192	0.040373	0.0316196	0.0490941	SLC2A10
105	1.95766e-174	7.02956e-173	0.0883396	0.067955	0.0509359	0.0870585	0.0730413	0.0614555	0.0964687	0.0667543	0.0667116	0.064969	0.0395213	0.0504687	0.0675468	0.0791886	0.0822704	0.031265	0.0957164	0.0543797	0.103259	0.0833996	0.0824943	0.0723486	0.0664556	0.0754755	0.0809099	0.0741739	0.0924808	0.0664774	0.0883396	0.0780024	0.103818	IGSF9
105	4.5972e-151	1.33954e-149	0.101015	0.0629482	0.0489448	0.0666726	0.0524771	0.044838	0.0782625	0.0512999	0.0579278	0.0492233	0.0392073	0.0296232	0.0553306	0.0675837	0.112211	0.0342663	0.0764039	0.0526685	0.0979328	0.0518636	0.0738966	0.0652046	0.0698323	0.0744492	0.0734877	0.0717644	0.0417517	0.0696318	0.0688683	0.0734334	0.101015	EHBP1L1
106	7.59966e-211	3.43038e-209	0.132589	0.0316247	0.0329102	0.159456	0.0696781	0.104784	0.10445	0.075442	0.0490282	0.0734109	0.0472959	0.0398775	0.0723232	0.147195	0.100138	0.0394944	0.0966807	0.0420386	0.118358	0.132589	0.0340935	0.0284382	0.104551	0.0984415	0.061713	0.030965	0.0635263	0.0483355	0.119905	0.0918887	0.146093	ERBB3
108	3.2336e-204	1.40477e-202	0.330625	0.100314	0.0929846	0.165772	0.139388	0.120655	0.188713	0.0496846	0.210095	0.14445	0.150399	0.135709	0.0720508	0.202503	0.186208	0.102191	0.258927	0.141761	0.298705	0.150649	0.132805	0.0410717	0.15722	0.133598	0.218932	0.126731	0.255132	0.150028	0.0362413	0.125357	0.330625	RNF213
112	5.80496e-237	3.00907e-235	0.131728	0.0930237	0.0700821	0.142076	0.0888926	0.0782935	0.1116	0.0984692	0.0920196	0.0769898	0.077468	0.0759918	0.0953715	0.131006	0.135631	0.0569188	0.0788246	0.0511872	0.120465	0.13233	0.111219	0.113628	0.106376	0.122194	0.051021	0.101639	0.0396324	0.0807186	0.131728	0.123554	0.129542	MICALL2
114	0	0	0.160258	0.0328549	0.00854834	0.145394	0.0642852	0.0758483	0.100627	0.160459	0.0582247	0.0454842	0.0863987	0.0343317	0.150084	0.149608	0.139925	0.0060853	0.0395331	0.00105608	0.116946	0.157166	0.0688035	0.104359	0.16807	0.163025	0.0240419	0.0492153	0.0504792	0.0911997	0.160258	0.159816	0.15364	CDH1
115	0	0	0.182357	0.11651	0.0752724	0.142359	0.13669	0.116519	0.180769	0.148276	0.143593	0.144503	0.134007	0.135182	0.15702	0.153947	0.192481	0.0602207	0.178859	0.10408	0.202592	0.163279	0.153594	0.162695	0.176613	0.186905	0.148228	0.168021	0.141165	0.16294	0.182357	0.18581	0.202186	INF2
116	3.08271e-161	9.98918e-160	0.0915927	0.0384538	0.0216572	0.0905807	0.0678477	0.0719512	0.115117	0.0530426	0.0724446	0.0633398	0.0486482	0.0321515	0.0801447	0.0964604	0.15905	0.01459	0.0807076	0.0273908	0.124897	0.0915927	0.0669711	0.0637263	0.0805715	0.0837813	0.0455133	0.0722828	0.0703887	0.0538843	0.0798176	0.0826503	0.102701	LPCAT4
118	8.1173e-39	4.84409e-38	0.0270583	0.0124767	0.00957691	0.0126044	0.0166947	0.0167146	0.0176412	0.00602793	0.00995948	0.016559	0.0117407	0.0138452	0.00565039	0.0196219	0.0283503	0.0108179	0.0353115	0.0170355	0.0277466	0.0132182	0.0126793	0.011379	0.0165736	0.0174202	0.0217531	0.00518001	0.0400017	0.0145347	0.0173948	0.0154758	0.0270583	PIGQ
120	1.0064e-66	1.05742e-65	0.0351888	0.0190942	0.0143981	0.0402106	0.0156708	0.0191797	0.0377148	0.013462	0.0400675	0.0177458	0.0131493	0.0185538	0.0160794	0.0405249	0.0322375	0.0172922	0.0436176	0.0241144	0.0371736	0.0351888	0.0257483	0.0132995	0.0238994	0.0264947	0.0326757	0.0250433	0.0448424	0.0245857	0.0351076	0.0265689	0.045415	DISP1
120	1.59489e-135	4.02176e-134	0.101987	0.082182	0.0738236	0.0517967	0.0734107	0.0344346	0.0441958	0.0590776	0.113093	0.0872884	0.107054	0.0642608	0.0785628	0.106837	0.096152	0.0808843	0.0629032	0.0623845	0.0720599	0.0973995	0.0899074	0.101514	0.0821971	0.101987	0.0588393	0.0471819	0.044253	0.0742433	0.0477682	0.0933296	0.107367	KANSL1
121	6.75092e-160	2.15631e-158	0.112986	0.0425287	0.0277905	0.0826556	0.11209	0.0984353	0.112258	0.0658031	0.0647984	0.106137	0.118279	0.101528	0.0571823	0.0851842	0.138179	0.00329398	0.129831	0.0636234	0.112986	0.0708496	0.0639604	0.0468753	0.0789299	0.0733167	0.0964265	0.0714169	0.12503	0.0671319	0.077027	0.0730984	0.109706	PAQR8
121	1.60105e-260	9.25796e-259	0.149589	0.0713036	0.0540325	0.167707	0.0618837	0.0674253	0.108404	0.0919139	0.0639727	0.0676919	0.0705633	0.0617913	0.0887844	0.151438	0.112561	0.0472365	0.091043	0.0674513	0.138258	0.131565	0.098247	0.104799	0.119647	0.147861	0.0702972	0.106378	0.0777337	0.0914553	0.149589	0.150144	0.16495	TCF7L2
123	3.41713e-115	6.88724e-114	0.055432	0.0325586	0.0285551	0.0642812	0.0327223	0.0417879	0.052204	0.0300344	0.0897742	0.0285717	0.0449765	0.031515	0.0279384	0.0561059	0.0703035	0.021324	0.0516294	0.0320143	0.0501756	0.055432	0.0354572	0.0262292	0.0405047	0.0383567	0.0127933	0.0362355	0.0387872	0.0336401	0.0487051	0.0360028	0.0609538	SYTL5
124	8.38294e-164	2.75905e-162	0.086712	0.0431565	0.0283732	0.100143	0.0807272	0.077731	0.107265	0.0550323	0.0968423	0.0761928	0.0581744	0.0661	0.0575011	0.0892559	0.109809	0.0319426	0.0994645	0.0450303	0.103921	0.086712	0.0611188	0.0480864	0.0630694	0.067777	0.0553773	0.0670191	0.0805535	0.0562742	0.0818413	0.070073	0.112089	OSBPL7
129	5.75259e-170	1.99308e-168	0.110154	0.0422116	0.0331021	0.11945	0.085368	0.070676	0.0948804	0.0616114	0.0975223	0.0898248	0.0957332	0.0895193	0.063605	0.119132	0.0447164	0.0390213	0.114767	0.0626713	0.121056	0.108621	0.063328	0.0433891	0.0862027	0.0880585	0.080439	0.0577732	0.104586	0.0669845	0.110154	0.0892368	0.135697	TRAK1
129	2.95714e-261	1.72182e-259	0.151246	0.056108	0.0260316	0.145859	0.085293	0.0845855	0.0970407	0.0986842	0.0946847	0.0936481	0.0921065	0.0832622	0.0971288	0.162129	0.101041	0.0139691	0.132899	0.0807768	0.130277	0.151246	0.0809886	0.0388001	0.123865	0.122483	0.0682113	0.0486791	0.111733	0.0933442	0.142541	0.121639	0.165843	RASSF6
130	2.77581e-205	1.21534e-203	0.119388	0.0415815	0.0333875	0.12651	0.0907635	0.0999542	0.0911014	0.0919258	0.090236	0.078401	0.0352623	0.0227204	0.0858521	0.122721	0.133882	0.0198962	0.112865	0.0560715	0.120249	0.112107	0.068048	0.0572264	0.100947	0.108155	0.070961	0.0638937	0.123356	0.0699156	0.119388	0.107997	0.147905	SHROOM3
130	7.84735e-72	8.93362e-71	0.0449569	0.0120784	0.0047874	0.0399535	0.0141245	0.0187873	0.0279077	0.0230089	0.0414263	0.00736455	0.0101983	0.0136774	0.0261806	0.0453964	0.0280664	0.00609974	0.0349514	0.0269813	0.0345125	0.0231493	0.0186604	0.0298209	0.0367278	0.0449569	0.0235955	0.0197183	0.0472277	0.0280883	0.0400108	0.0424989	0.0417532	ZSWIM6
131	3.37589e-86	4.75917e-85	0.0426807	0.00890697	0.00138116	0.0477846	0.0151967	0.0196128	0.0269032	0.0297839	0.0125006	0.0211284	0.0210162	0.0232532	0.0229274	0.0439401	0.000428115	0.000364807	0.0399356	0.0286552	0.0427134	0.0426807	0.025308	0.0278041	0.0193203	0.0372006	0.0418125	0.0289146	0.0407372	0.0299944	0.0435232	0.0347764	0.0505833	EPB41L1
133	1.92896e-139	5.00335e-138	0.151516	0.065357	0.05638	0.0346846	0.132992	0.100449	0.124476	0.015372	0.156882	0.130566	0.112126	0.105407	0.0298961	0.0711329	0.144412	0.0708693	0.103409	0.0448898	0.138235	0.0828367	0.0753373	0.043149	0.0303511	0.0574721	0.0626641	0.0443483	0.0801964	0.0589693	0.0590045	0.0497287	0.151516	UPF2
135	3.65361e-96	5.90814e-95	0.0863433	0.0863433	0.0704377	0.116539	0.190103	0.166083	0.146363	0.0520815	0.035936	0.138101	0.0480155	0.0923456	0.0624331	0.0912493	0.0797596	0.077556	0.0412101	0.051662	0.110789	0.0790053	0.0798227	0.0645793	0.0700712	0.0874234	0.0519173	0.070848	0.00927117	0.0747126	0.0817167	0.0883527	0.0974994	AC023157.3
137	4.28642e-205	1.87429e-203	0.112607	0.0506525	0.0240179	0.109825	0.0970995	0.0521353	0.115157	0.0328221	0.0592958	0.107298	0.106841	0.107139	0.0993027	0.105911	0.105114	0.0287024	0.0563329	0.0330074	0.109322	0.107397	0.0762583	0.101278	0.103893	0.107158	0.0637934	0.105518	0.0628103	0.0802127	0.112607	0.107841	0.119275	ITGB4
138	9.11849e-145	2.49646e-143	0.148196	0.0674098	0.0468673	0.111331	0.0641997	0.0639135	0.105048	0.0753469	0.125752	0.0523769	0.0456581	0.0114727	0.0748527	0.113377	0.152473	0.0466595	0.070587	0.0554785	0.114132	0.112856	0.0884333	0.0655664	0.0882496	0.0909209	0.0750997	0.0784143	0.0435462	0.0779419	0.0783344	0.0931517	0.148196	SIRT7
140	2.23604e-87	3.21304e-86	0.0523058	0.0323435	0.0304032	0.0583052	0.0420556	0.0356222	0.0544867	0.0262028	0.0947915	0.0427069	0.0474926	0.0415433	0.0233867	0.0549309	0.0642983	0.0267339	0.0464975	0.0271642	0.0718522	0.0523058	0.0363769	0.0125454	0.0385526	0.0374592	0.0402935	0.0319071	0.0263012	0.0341596	0.0341511	0.0365127	0.0714482	DAPK2
140	1.69253e-84	2.32736e-83	0.0713642	0.0201331	0.0145425	0.0500672	0.0222579	0.0222012	0.0526362	0.026177	0.0518252	0.0146073	0.0301851	0.0157062	0.033157	0.0465058	0.0537567	0.0165868	0.0734342	0.0377064	0.0596435	0.0446111	0.029807	0.0342885	0.0367995	0.0422875	0.0473938	0.0394914	0.0723979	0.0297395	0.048785	0.0412975	0.0713642	LIMK2
145	2.22306e-101	3.86706e-100	0.0479692	0.029798	0.0247729	0.0478766	0.0232193	0.0331656	0.0444576	0.0290076	0.0488558	0.0266429	0.0257473	0.0236227	0.0311313	0.0470606	0.045525	0.0185076	0.0550458	0.0295805	0.0516371	0.0479692	0.0393591	0.035939	0.0363373	0.0433473	0.0348567	0.0403849	0.0638564	0.0356812	0.0480346	0.0419896	0.0535865	SYTL4
146	2.77146e-53	2.2555e-52	0.0245187	0.0166204	0.0138591	0.0244329	0.0074933	0.0114551	0.0189565	0.0183022	0.000609915	0.00551389	0.00204285	0.00205223	0.0183217	0.0236439	0.0130349	0.00376165	0.0383054	0.0247601	0.0208226	0.0151303	0.0194818	0.0192721	0.0193403	0.0220328	0.0283264	0.021972	0.0349311	0.0216104	0.0245187	0.0219717	0.0332999	FAM20A
147	1.69462e-286	1.13441e-284	0.128699	0.0570174	0.0336615	0.0978058	0.059731	0.0640363	0.0851132	0.129956	0.0457736	0.0674662	0.0679472	0.0648793	0.126464	0.124982	0.128152	0.0278692	0.0446501	0.034977	0.100441	0.0990004	0.0889056	0.104764	0.12485	0.131025	0.0402782	0.081874	0.0192311	0.0837338	0.128699	0.125815	0.12156	ST14
147	2.51506e-87	3.61087e-86	0.0564847	0.0178694	0.0135168	0.0597259	0.0220839	0.0298276	0.0496353	0.0208571	0.0481015	0.0233827	0.0174834	0.0158036	0.0222471	0.052332	0.0488496	0.0145839	0.0650239	0.0318229	0.0485111	0.0564847	0.0310227	0.0150113	0.0369031	0.0343396	0.0347651	0.0329365	0.0573337	0.0306254	0.048789	0.0317463	0.0656613	USP54
149	6.52141e-221	3.12897e-219	0.106354	0.0864455	0.0607937	0.0901848	0.07688	0.059867	0.101555	0.101749	0.0539353	0.066778	0.0670863	0.0586759	0.0991748	0.0948187	0.129576	0.0311079	0.0792619	0.0609663	0.100407	0.086679	0.0995922	0.112838	0.0920337	0.112261	0.0574657	0.0804317	0.0524585	0.0810989	0.106354	0.117411	0.100987	IL17RE
150	1.1413e-272	7.1279e-271	0.129022	0.0548017	0.0379244	0.111005	0.0844897	0.0783898	0.10179	0.129933	0.15113	0.0951732	0.12801	0.107712	0.124847	0.130138	0.122063	0.0458625	0.089875	0.0655127	0.110522	0.12758	0.0941691	0.125795	0.134798	0.137561	0.107828	0.128152	0.0790605	0.100633	0.129022	0.133182	0.110106	LAMA3
151	6.21987e-67	6.55363e-66	0.0451303	0.0180428	0.0148579	0.0548852	0.0252268	0.0212408	0.0515341	0.0154318	0.0292607	0.0257983	0.0257008	0.0212179	0.0204394	0.0447374	0.0601507	0.0162854	0.0504489	0.0224076	0.0374392	0.00814605	0.0162026	0.0164826	0.0197159	0.0291951	0.0274421	0.0220274	0.0431832	0.0203054	0.0451303	0.0295631	0.0600665	DAPK1
152	4.23327e-256	2.41455e-254	0.166318	0.0726342	0.0383947	0.121453	0.0731772	0.0725176	0.104337	0.0955586	0.0359097	0.0801083	0.0790894	0.0752174	0.0817706	0.139423	0.101026	0.0273474	0.0822178	0.0516885	0.112725	0.12586	0.11645	0.179943	0.143164	0.166318	0.0882377	0.139379	0.0518883	0.105471	0.143066	0.163353	0.135812	EPS8
154	1.07325e-156	3.30529e-155	0.0806801	0.0593141	0.0508406	0.0863923	0.0674114	0.0625836	0.0765785	0.0603696	0.074247	0.0658955	0.0561164	0.0519595	0.0588408	0.0754601	0.0861635	0.0396378	0.108985	0.0527302	0.0983276	0.0806801	0.0734354	0.05868	0.070647	0.072051	0.0708746	0.0614701	0.0812569	0.057412	0.0853398	0.0744366	0.10915	SPIRE2
155	6.92344e-46	4.84959e-45	0.0203259	0.0137674	0.00886011	0.0248338	0.0173055	0.0155773	0.0209289	0.0156702	0.0118481	0.017011	0.0132215	0.0141749	0.011963	0.0249389	0.0283227	0.00270998	0.0334248	0.0170289	0.0277376	0.0203259	0.0203221	0.0197208	0.0214249	0.0222645	0.0223946	0.0223281	0.0322381	0.0172886	0.0226286	0.0230589	0.0255199	STS
155	4.69685e-209	2.0864e-207	0.096862	0.0620121	0.0425511	0.0829088	0.0505817	0.0610423	0.0954957	0.0959724	0.0556787	0.0585823	0.0537814	0.0555763	0.0919462	0.0966239	0.0984139	0.0202203	0.0911259	0.0653509	0.0986184	0.0858372	0.0858746	0.0990771	0.0934352	0.109785	0.0721677	0.0947411	0.08295	0.0850782	0.096862	0.108585	0.0883512	FA2H
159	1.54938e-173	5.528e-172	0.112293	0.064526	0.0343001	0.0807414	0.0531968	0.0745735	0.0503275	0.130777	0.0401882	0.050024	0.0382159	0.036222	0.133814	0.0960671	0.0654772	0.0413908	0.078672	0.0732122	0.0781412	0.0820773	0.112293	0.1618	0.119527	0.135769	0.0755877	0.107897	0.0833472	0.0972001	0.0996789	0.137747	0.0901459	ZBTB43
159	9.43065e-177	3.43415e-175	0.176833	0.0707506	0.0538708	0.124026	0.091443	0.0922766	0.152043	0.0778347	0.121172	0.0982647	0.0686727	0.0735499	0.0928922	0.122836	0.176752	0.0512923	0.156816	0.0730407	0.157627	0.113614	0.0950946	0.0826086	0.110526	0.10649	0.104762	0.103313	0.148999	0.0961178	0.108565	0.103155	0.176833	DNM2
161	1.34095e-235	6.89766e-234	0.148412	0.075203	0.069807	0.171766	0.0596022	0.0860169	0.103549	0.0972489	0.17184	0.0465885	0.050857	0.0390782	0.0467513	0.163697	0.118184	0.05864	0.0857782	0.0763704	0.135139	0.0759269	0.0873082	0.0888428	0.0557681	0.12891	0.0950178	0.103586	0.0441539	0.082292	0.148412	0.130425	0.17695	VEGFA
162	1.38065e-85	1.93176e-84	0.0457753	0.0119948	0.00525434	0.0443126	0.0194888	0.0180837	0.0156269	0.0411412	0.0338462	0.0171567	0.029456	0.0207178	0.0282783	0.0483323	0.0591871	0.00230208	0.0674972	0.0393834	0.0425026	0.0430003	0.0217891	0.0235049	0.0463364	0.049558	0.0457941	0.0299025	0.0666069	0.0390121	0.0457753	0.0475504	0.047891	GAREM1
166	8.76717e-168	3.00341e-166	0.0891387	0.035907	0.0152254	0.0957537	0.127937	0.132218	0.116208	0.0755636	0.026424	0.106022	0.0627236	0.0988111	0.0724209	0.0867732	0.114329	0.0122209	0.0351693	0.0108551	0.0989676	0.0897964	0.0457147	0.0575264	0.0796122	0.0815621	0.0589754	0.071192	0.0433356	0.0539615	0.0891387	0.0813473	0.102682	FUT2
171	5.92714e-66	6.14671e-65	0.034171	0.0203085	0.00906196	0.0374208	0.0169631	0.0236493	0.0353832	0.0270277	0.0323799	0.014719	0.0101578	0.0111507	0.0273439	0.0337007	0.0315054	0.00422731	0.0370115	0.0277805	0.0510073	0.0275519	0.0302368	0.0252506	0.0274483	0.0322264	0.0342068	0.0293644	0.0330225	0.0249805	0.034171	0.0337194	0.036653	MAP7D2
171	4.07628e-222	1.96705e-220	0.13653	0.0212869	0.0236116	0.114624	0.101678	0.0895968	0.0871554	0.107972	0.0798242	0.107668	0.14626	0.104062	0.130959	0.127715	0.116986	0.0324087	0.110841	0.0407512	0.100561	0.13653	0.00297888	0.0689417	0.129191	0.12048	0.0594998	0.068752	0.112935	0.0505714	0.124385	0.1167	0.154902	LSR
173	1.00009e-225	4.91802e-224	0.127533	0.0679724	0.04793	0.121833	0.0775785	0.0706284	0.129611	0.0982105	0.113878	0.0716954	0.0572173	0.0635051	0.104115	0.132997	0.0401782	0.0459432	0.140888	0.0795213	0.11933	0.123123	0.0882633	0.0830353	0.12207	0.127834	0.108486	0.0965897	0.124575	0.102912	0.127533	0.124142	0.134904	BAIAP2L1
179	1.01483e-217	4.7469e-216	0.106535	0.0698591	0.0490217	0.0984166	0.0949686	0.0891794	0.095517	0.108307	0.0980415	0.0927616	0.100461	0.0921301	0.0830039	0.103496	0.0845419	0.0493897	0.0345556	0.049882	0.0808553	0.106535	0.0609204	0.113263	0.0994772	0.114635	0.070656	0.0982424	0.00271524	0.0907815	0.112082	0.115835	0.104804	SEMA3B
179	2.69937e-208	1.18964e-206	0.106914	0.0774051	0.0612762	0.0875698	0.0708058	0.0607164	0.0828192	0.110413	0.0468867	0.0712747	0.0740994	0.0674738	0.104067	0.0884345	0.0760647	0.0683995	0.0156939	0.00607072	0.0834241	0.0867233	0.10631	0.138645	0.100591	0.119463	0.0547033	0.113106	0.0222206	0.0757554	0.106914	0.121844	0.09126	TRIM31
179	1.91324e-139	4.96642e-138	0.0851028	0.0250408	0.0111152	0.101171	0.0374483	0.0457244	0.0736756	0.042124	0.0933752	0.0360847	0.0386552	0.0347981	0.0477147	0.0847882	0.044808	0.0171162	0.0543775	0.0355609	0.067188	0.0851028	0.0490557	0.0512716	0.0606274	0.066805	0.0415924	0.0634373	0.00776671	0.0426302	0.0811637	0.0663743	0.0998018	DNMBP
181	6.41164e-142	1.69987e-140	0.1335	0.0665407	0.047663	0.0205276	0.115467	0.0793735	0.116599	0.0218202	0.069691	0.13008	0.189497	0.137744	0.0377611	0.102315	0.161108	0.0460165	0.0852718	0.0641903	0.132634	0.0349212	0.075087	0.0634126	0.0751516	0.0928855	0.0759418	0.0628579	0.0747553	0.0956275	0.00458724	0.0851714	0.1335	TAPBP
182	8.04268e-253	4.48811e-251	0.150869	0.0143112	0.00245572	0.124685	0.0877631	0.094711	0.076294	0.0906565	0.051457	0.0851056	0.0752214	0.0703181	0.144334	0.141094	0.0880707	0.0222491	0.0789804	0.0543304	0.105706	0.122711	0.0350831	0.0965958	0.152452	0.187506	0.0219198	0.0806488	0.0757054	0.077925	0.150869	0.189619	0.126284	LDLR
188	1.46069e-179	5.4553e-178	0.107468	0.0492461	0.0363823	0.115394	0.0848498	0.0938522	0.113199	0.0789354	0.134272	0.0938227	0.113456	0.0938118	0.0870657	0.104433	0.126719	0.0293099	0.113387	0.0712658	0.125149	0.107468	0.0760329	0.0771035	0.0908607	0.0982798	0.0919486	0.0876272	0.0954919	0.0773461	0.106247	0.09896	0.135551	ITPR3
189	3.2573e-95	5.21449e-94	0.0805302	0.0188162	0.0120709	0.0468951	0.0287379	0.0388927	0.0367304	0.0228101	0.0659188	0.0292517	0.0174591	0.0254374	0.0337961	0.0547124	0.0456889	0.00921869	0.0564671	0.0301242	0.0605976	0.0145416	0.033038	0.0468337	0.0109425	0.0541599	0.0319913	0.035043	0.0746914	0.034077	0.0429928	0.0530515	0.0805302	PPP1R15B
190	4.90992e-164	1.61916e-162	0.216025	0.0475067	0.0373619	0.147379	0.0694425	0.063785	0.0852078	0.0324146	0.109348	0.0733164	0.0682964	0.0593374	0.0373414	0.148865	0.116155	0.0504822	0.116153	0.0506153	0.131503	0.150441	0.0493166	0.0235104	0.0920367	0.0714867	0.00406694	0.0422144	0.0722379	0.0615537	0.0989275	0.0653677	0.216025	GOLGB1
190	3.52821e-126	8.09364e-125	0.0612939	0.0399477	0.017674	0.0515829	0.0342421	0.0339839	0.0344109	0.0575071	0.0670619	0.0360795	0.0525066	0.0434579	0.0632775	0.0641297	0.0641336	0.0144416	0.0612011	0.0445353	0.0561494	0.0478844	0.0564738	0.0768874	0.0643834	0.0732491	0.0362889	0.0422241	0.0619954	0.0571619	0.0612939	0.0717227	0.0528012	SLC7A11
192	4.7391e-163	1.55367e-161	0.184429	0.0533515	0.0425443	0.0518019	0.0902704	0.0645805	0.0514808	0.0283214	0.140045	0.0875098	0.123249	0.0966225	0.0352681	0.108399	0.0707637	0.0609025	0.113822	0.0485558	0.117431	0.0845245	0.0790415	0.0387066	0.045082	0.0894429	0.0407429	0.0195848	0.0919056	0.0714353	0.0373147	0.0809799	0.184429	TCF25
197	9.41036e-50	7.14523e-49	0.0401355	0.0115525	0.0124395	0.0356481	0.0193131	0.0216495	0.0252367	0.00218251	0.0782035	0.0200891	0.0266666	0.0226336	0.00633741	0.0275586	0.013877	0.0116417	0.0192219	0.00790734	0.0242427	0.0301336	0.0156829	0.00712143	0.014871	0.0125633	0.00809248	0.0132014	0.00744298	0.0100056	0.0211066	0.0105763	0.0401355	UBL7-AS1
198	4.7662e-221	2.2901e-219	0.107784	0.0888078	0.05887	0.0878185	0.118737	0.112939	0.0885836	0.105476	0.127047	0.116716	0.153366	0.126089	0.101286	0.0945797	0.127755	0.0316901	0.106912	0.0775858	0.110431	0.0917661	0.0954422	0.105188	0.0981117	0.11223	0.0793202	0.0762048	0.12046	0.0914543	0.107784	0.113559	0.104166	CACFD1
202	4.1529e-77	5.14328e-76	0.0355148	0.0135603	0.00931963	0.0358294	0.0155401	0.0212763	0.0277486	0.0239709	0.0225722	0.0132528	0.00489531	0.00935653	0.0287355	0.0339382	0.0278392	0.00507007	0.0283636	0.0173701	0.0313615	0.0323248	0.0184715	0.0232985	0.025053	0.0322315	0.0187622	0.0215309	0.0286899	0.0167457	0.0355148	0.033769	0.0364105	PRDM16
204	1.07952e-184	4.17108e-183	0.132747	0.0930787	0.0608346	0.0860021	0.100239	0.104147	0.0935892	0.131136	0.0563611	0.10049	0.101311	0.0708469	0.132747	0.0988177	0.106458	0.0392429	0.0649878	0.0760053	0.0902192	0.0403856	0.10018	0.112191	0.0791521	0.123038	0.0706351	0.0971839	0.0591251	0.111191	0.0964662	0.121988	0.113542	STXBP2
206	6.21209e-201	2.66081e-199	0.0923255	0.0484804	0.0292086	0.0946657	0.100899	0.0973295	0.0889305	0.0816695	0.0962536	0.0976087	0.082591	0.092259	0.0719356	0.0896336	0.101269	0.0138169	0.0697864	0.0317995	0.104269	0.0857391	0.0706721	0.0740368	0.0825884	0.0881048	0.0382153	0.0770919	0.0611377	0.0655936	0.0923255	0.0878276	0.0997052	CAPN5
207	1.06562e-148	3.02102e-147	0.101245	0.0553401	0.0457443	0.110728	0.0468168	0.0751732	0.0870291	0.077042	0.113357	0.0523298	0.014945	0.0470335	0.0735881	0.117248	0.115886	0.0400372	0.0726215	0.0633882	0.124325	0.102774	0.0746829	0.0625871	0.0722075	0.101245	0.070199	0.0764464	0.069218	0.0714341	0.0667074	0.097399	0.127068	LPIN2
207	5.44923e-209	2.41741e-207	0.128547	0.0581981	0.0300656	0.107923	0.0957434	0.0906802	0.120771	0.0937175	0.100721	0.101052	0.0858532	0.0777704	0.108375	0.134315	0.0536073	0.0218472	0.0439004	0.040932	0.0917826	0.1022	0.0703669	0.110329	0.122047	0.134739	0.083189	0.0991062	0.0408265	0.0936914	0.128547	0.130151	0.142745	EPN1
208	3.31919e-158	1.03553e-156	0.178389	0.0771825	0.049797	0.074022	0.127283	0.14053	0.113814	0.117263	0.108953	0.149279	0.152535	0.13113	0.108453	0.110882	0.192135	0.0291819	0.154947	0.12863	0.0846508	0.121912	0.0739447	0.165063	0.124571	0.148703	0.0904262	0.0696933	0.157532	0.130622	0.108986	0.135522	0.178389	ATF4
209	1.19395e-56	1.04251e-55	0.0399914	0.0138631	0.0131483	0.0271587	0.00765601	0.010343	0.0235997	0.0111285	0.0357278	0.00747547	0.00710483	0.00703373	0.0106987	0.0222293	0.0211959	0.0127125	0.0474952	0.0187899	0.026435	0.0262559	0.0175614	0.00825397	0.0156475	0.0147442	0.0302018	0.0178335	0.0445943	0.0171337	0.0241682	0.0152095	0.0399914	ACER2
214	1.67704e-98	2.80522e-97	0.0451881	0.0174014	0.0127204	0.0419979	0.014697	0.0170476	0.0399619	0.0332075	0.0449275	0.0139186	0.00639036	0.0106136	0.0337023	0.0453983	0.0468587	0.00898271	0.0341465	0.0247086	0.0452156	0.0451881	0.0293007	0.0373267	0.0357999	0.0400171	0.0159694	0.038024	0.0286557	0.0258904	0.0429694	0.0399474	0.0448436	SHH
215	6.32583e-152	1.86102e-150	0.0790819	0.054271	0.0434285	0.0485315	0.026214	0.0257374	0.038488	0.0645305	0.0304732	0.0196938	0.00195569	0.0152087	0.097289	0.0666397	0.0587136	0.0555775	0.037091	0.0313404	0.0484862	0.0392768	0.0815422	0.131651	0.0791216	0.102503	0.0350715	0.0856497	0.0240775	0.0642916	0.0790819	0.101957	0.0503454	AC015912.3
219	2.99036e-148	8.45621e-147	0.121944	0.0420942	0.0255023	0.0662197	0.0502163	0.0577017	0.085255	0.0283078	0.0766315	0.0561951	0.0570933	0.0515316	0.0534324	0.0957147	0.092479	0.01027	0.0778399	0.0665117	0.0993266	0.0714184	0.0650861	0.0653205	0.0798689	0.0887108	0.10017	0.0771452	0.101163	0.0788868	0.0685043	0.0816584	0.121944	ERBIN
224	4.02847e-133	9.94164e-132	0.0649783	0.0397381	0.0308006	0.0721949	0.0666373	0.0596635	0.0683026	0.0507327	0.0783897	0.0629359	0.0702214	0.0616898	0.0493874	0.0649429	0.0816441	0.0308471	0.0595369	0.0259422	0.0656295	0.0649783	0.0518736	0.0472305	0.0531006	0.0609667	0.0453053	0.0532683	0.00364617	0.0453196	0.0652436	0.0597933	0.0817838	MST1R
226	2.56334e-51	2.01192e-50	0.0532958	0.0152485	0.0155807	0.0406613	0.0125355	0.0188708	0.0256404	0.00797798	0.0650344	0.0137348	0.0121596	0.0139417	0.00716137	0.0342102	0.0296158	0.0174173	0.0484379	0.0144023	0.0349116	0.0346882	0.01994	0.00158411	0.0165672	0.0154627	0.0178268	0.0134638	0.0375554	0.0143578	0.0344049	0.0150772	0.0532958	CCSER1
227	4.27802e-104	7.68486e-103	0.077211	0.0235854	0.0179015	0.0746308	0.0546959	0.0647307	0.0586221	0.0135253	0.0762021	0.0566426	0.0775962	0.0630462	0.0411454	0.077211	0.0919238	0.013566	0.0717468	0.0472831	0.0483388	0.0612194	0.0233824	0.00617992	0.0528624	0.0600411	0.0481718	0.0110084	0.0569458	0.0459081	0.0468954	0.0543631	0.0736911	TMEM181
227	3.03705e-153	9.08621e-152	0.179628	0.0319427	0.0236213	0.0802583	0.0667771	0.0618261	0.0879146	0.017901	0.1172	0.0744592	0.0696886	0.0639119	0.0283319	0.141118	0.129601	0.0286316	0.0966128	0.029466	0.115194	0.111855	0.0567299	0.0343498	0.0675451	0.095862	0.0566918	0.0390015	0.0692405	0.0410845	0.0374301	0.0869326	0.179628	NCOR1
227	1.15396e-73	1.35368e-72	0.0575525	0.0297575	0.0165262	0.0114907	0.0278926	0.0347275	0.0468529	0.00279964	0.0331616	0.024476	0.0116747	0.0180301	0.0575525	0.0561903	0.0528773	0.017254	0.0491705	0.033454	0.0556088	0.0218394	0.0496589	0.0636834	0.0531117	0.0593425	0.0184432	0.0474684	0.0490885	0.045868	0.0145369	0.0602174	0.0581003	CYTH1
228	7.69765e-99	1.29405e-97	0.119556	0.0438774	0.0462503	0.0776446	0.0151296	0.0359973	0.0810948	0.0345662	0.105486	0.0156711	0.0143168	0.00997561	0.0347027	0.0904976	0.106415	0.0369083	0.104976	0.0607701	0.142371	0.0442766	0.0601039	0.0291391	0.0614295	0.0728478	0.0821559	0.0536147	0.0897026	0.0567245	0.0665531	0.0733217	0.119556	MX2
231	6.62296e-183	2.52985e-181	0.130942	0.0165503	0.010532	0.181304	0.0553265	0.0696384	0.0800387	0.0462754	0.153431	0.0590135	0.0463767	0.0555193	0.0744498	0.16944	0.126053	0.0112922	0.100165	0.0269973	0.12454	0.155037	0.0634711	0.0716518	0.09532	0.130942	0.032559	0.0684969	0.0295128	0.0369031	0.14801	0.127892	0.186593	KLF3
231	7.0702e-48	5.17053e-47	0.0275592	0.00803847	0.00411896	0.0198251	0.0112108	0.01801	0.0199256	0.0246395	0.0223049	0.00918791	0.0187752	0.00866112	0.0248321	0.0275592	0.0308403	0.00229907	0.0207692	0.0171017	0.0157124	0.0241734	0.00487348	0.0219253	0.0240675	0.0245069	0.0119964	0.0200064	0.0255923	0.0139696	0.0128131	0.0249526	0.0276045	LPAR2
232	1.2731e-39	7.73924e-39	0.0274638	0.00572619	0.00364121	0.0147861	0.0206492	0.0229886	0.0137293	0.000410027	0.0315819	0.00764087	0.0249166	0.0114399	0.0103236	0.0274638	0.0121792	1.75814e-05	0.0203246	0.0113843	0.0184582	0.0137166	0.00925429	0.0116745	0.00927938	0.0219796	0.0196954	0.0161961	0.0420448	0.0166332	0.0143689	0.0212459	0.0248392	WBP1L
234	1.70631e-179	6.35848e-178	0.0972648	0.0522114	0.0397588	0.103182	0.113652	0.0862234	0.0881061	0.0799747	0.0705402	0.110349	0.0914014	0.112478	0.0895672	0.101608	0.107336	0.0377134	0.0771677	0.0276348	0.062178	0.0972648	0.0515983	0.062012	0.09521	0.0934055	0.0340494	0.0579688	0.053212	0.0515924	0.0889707	0.0923461	0.120922	RASSF7
236	1.26173e-140	3.3163e-139	0.126348	0.0136402	0.00843904	0.124962	0.0364703	0.0386736	0.0660658	0.0376011	0.130433	0.0395732	0.0392605	0.0389032	0.0296764	0.111851	0.0658494	0.0172492	0.0894573	0.0476877	0.0976354	0.100512	0.0375238	0.0272616	0.0683259	0.0707452	0.0647955	0.0502618	0.0452135	0.0469353	0.0962813	0.0649932	0.126348	ARHGAP21
237	3.39433e-143	9.12172e-142	0.0817343	0.0205872	0.00765165	0.0949535	0.0376037	0.0345774	0.0647946	0.034318	0.0570848	0.041155	0.0274258	0.0332889	0.040529	0.0827881	0.0828231	0.00239625	0.0700063	0.035705	0.0848301	0.0806902	0.0435117	0.0399791	0.0631201	0.0658845	0.034202	0.0549613	0.0565949	0.0402973	0.0817343	0.0642311	0.0998098	ASAP2
238	1.50821e-129	3.59761e-128	0.080051	0.0473614	0.0324877	0.0672517	0.0443439	0.0458662	0.0577815	0.0494463	0.0755375	0.0446386	0.037395	0.035357	0.0474429	0.0785715	0.0748116	0.0342827	0.0567675	0.0382243	0.0766763	0.080051	0.058755	0.0554413	0.0640089	0.071935	0.0267527	0.0462266	0.0378532	0.0481173	0.0796249	0.0718382	0.100004	SPPL2B
241	6.75411e-63	6.61951e-62	0.0467844	0.038406	0.0336593	0.0344888	0.0056634	0.00650308	0.0394084	0.017735	0.0482275	0.00694044	0.0056609	0.00523333	0.035123	0.0415156	0.0710878	0.0229568	0.0334242	0.0468874	0.0913148	0.0397337	0.0467844	0.0361892	0.0404388	0.0425363	0.081142	0.049015	0.0454401	0.061481	0.0454637	0.0415174	0.0688938	RSAD2
244	5.34763e-128	1.25947e-126	0.0663295	0.0354443	0.0229851	0.0657967	0.0232751	0.0205773	0.0705272	0.0439414	0.0375459	0.0195664	0.0198717	0.0128117	0.0444454	0.0627978	0.0639876	0.0123028	0.0615336	0.0335399	0.0587565	0.0625647	0.0439572	0.051598	0.0549691	0.0543861	0.0126751	0.0562321	0.0734719	0.0417095	0.0663295	0.0538249	0.0759564	SLC22A23
245	2.32999e-52	1.86589e-51	0.019672	0.0157734	0.0117545	0.0133437	0.00945287	0.00626466	0.0121356	0.0225822	0.00288975	0.0113447	0.0111146	0.0106027	0.0219505	0.0177072	0.0167422	0.00459503	0.0188101	0.0169537	0.0152824	0.0175543	0.0195252	0.0243858	0.0215477	0.021429	0.0171491	0.0191138	0.0176078	0.0174238	0.019672	0.0208389	0.0145134	NPAS1
247	3.79019e-155	1.15455e-153	0.0769361	0.0357956	0.0344635	0.080846	0.0308526	0.0027201	0.0747765	0.0551399	0.030297	0.0390099	0.0500131	0.0418056	0.0498809	0.0818627	0.0790381	0.0291815	0.0657288	0.0315781	0.0674548	0.0769361	0.0347053	0.0268634	0.0645958	0.0623926	0.0335168	0.0309436	0.0528519	0.0335306	0.0744454	0.0599774	0.0916958	DDR1
247	4.75138e-149	1.35273e-147	0.0909467	0.0389667	0.0246072	0.0789277	0.0391182	0.0404556	0.0685296	0.0122199	0.0257397	0.0415126	0.0140925	0.0353327	0.0531315	0.0879403	0.0726134	0.0283476	0.0931984	0.0512804	0.0813409	0.0877445	0.0642956	0.05921	0.0745863	0.0810378	0.058071	0.0429006	0.0440218	0.0558239	0.0909467	0.0808031	0.106908	SUN1
247	1.22659e-170	4.29409e-169	0.0755122	0.0307232	0.0209333	0.0821872	0.0437679	0.0266611	0.0966644	0.055074	0.0346507	0.0388393	0.0670251	0.016203	0.0385125	0.0801843	0.087199	0.0228696	0.0396074	0.0277912	0.0736547	0.0755122	0.0387308	0.0573897	0.063927	0.0690805	0.0414309	0.0684224	0.0272635	0.0405665	0.0721065	0.0710902	0.0704164	ERBB2
248	1.11498e-145	3.09298e-144	0.177577	0.0409094	0.0376741	0.0901877	0.0321914	0.027823	0.075339	0.00663456	0.0866185	0.0359697	0.0299461	0.0357154	0.00681617	0.132581	0.05452	0.0623906	0.104469	0.0371817	0.11579	0.102794	0.0664908	0.0308475	0.0268695	0.0826842	0.0465562	0.0309405	0.0935181	0.0423606	0.0570864	0.0866485	0.177577	PRPF4B
255	8.18608e-100	1.39575e-98	0.0389698	0.0267209	0.0110497	0.040692	0.0379145	0.0421402	0.0518061	0.0384186	0.0587757	0.0377561	0.039044	0.0399158	0.039258	0.0382438	0.0799487	0.0107052	0.0279883	0.0128643	0.0468216	0.0389698	0.0398953	0.0437015	0.0370874	0.0382183	0.0281215	0.0389603	0.0124445	0.0282203	0.0434145	0.0390866	0.0447921	ITPKA
256	3.88269e-89	5.73141e-88	0.0818869	0.0211513	0.0207796	0.0582848	0.0343014	0.0222765	0.0506211	0.0294272	0.0721984	0.0390251	0.0437411	0.0372313	0.0304958	0.0687456	0.0477952	0.0173159	0.0673344	0.0307738	0.0579899	0.0583286	0.0289962	0.0198455	0.0349272	0.0465959	0.03335	0.0220448	0.0580238	0.0306305	0.0491496	0.0436835	0.0818869	SIPA1L1
258	7.45392e-143	1.99832e-141	0.180957	0.0536347	0.0501805	0.0546915	0.0933846	0.0632956	0.0856074	0.020023	0.0907971	0.0980983	0.0746045	0.0791557	0.0244787	0.115348	0.086172	0.0673722	0.0964128	0.0657881	0.137907	0.09629	0.0649178	0.0233487	0.0707412	0.0812253	0.076688	0.036638	0.0672309	0.0709028	0.031236	0.0802965	0.180957	ANKRD11
259	1.08946e-118	2.3038e-117	0.0526722	0.0294057	0.0151758	0.0559281	0.0378647	0.0419506	0.0445477	0.0404329	0.0775204	0.0308418	0.0420867	0.0332461	0.0417124	0.0524244	0.0511317	0.00766688	0.0367466	0.0256295	0.054771	0.0526722	0.0387383	0.0380719	0.0462197	0.0494179	0.0298524	0.0282037	0.0329669	0.0345485	0.0508305	0.0513459	0.057296	SLC25A25-AS1
260	2.96116e-162	9.64187e-161	0.0796509	0.0454821	0.0381939	0.0865738	0.0609334	0.0365515	0.0665002	0.0624304	0.0476145	0.0706721	0.0753316	0.0659557	0.0603151	0.0786421	0.0702217	0.0391948	0.0543706	0.0341312	0.0783476	0.0796509	0.0583366	0.0537899	0.0678328	0.0701525	0.048392	0.058976	0.0570454	0.0552447	0.0816013	0.0696587	0.0946489	ARHGEF16
265	1.04519e-121	2.29408e-120	0.146014	0.0521719	0.0447581	0.0798957	0.0476309	0.06305	0.0541861	0.0313111	0.0486604	0.0430372	0.0346789	0.0263114	0.0389937	0.11603	0.0660023	0.059022	0.0629297	0.0275194	0.0661807	0.0687317	0.0744584	0.0790048	0.0491829	0.0881335	0.0193861	0.0445065	0.0186736	0.0457812	0.0308747	0.0857963	0.146014	YME1L1
266	1.74344e-143	4.70407e-142	0.0700197	0.0198637	0.00775	0.0746664	0.0313514	0.019008	0.0651812	0.0484755	0.00855554	0.0413244	0.0523947	0.041194	0.0497318	0.07318	0.0381481	0.00312286	0.055184	0.0181586	0.053477	0.0663151	0.0376144	0.0472937	0.0440587	0.0655752	0.0383096	0.0489315	0.0389058	0.036152	0.0700197	0.0635894	0.0769982	KIAA1522
272	3.82382e-122	8.44261e-121	0.0962774	0.0284773	0.0123149	0.0823554	0.0517041	0.0501434	0.0614412	0.0599563	0.00727332	0.0543418	0.0549989	0.0374611	0.0581326	0.0962774	0.0682915	0.00974009	0.0645375	0.0388027	0.0750913	0.081513	0.0443412	0.0345448	0.0766511	0.070565	0.050847	0.0477391	0.0702147	0.0607197	0.0690981	0.0679418	0.0964765	IBTK
278	8.76123e-149	2.48801e-147	0.0696417	0.0524565	0.0389237	0.0690515	0.0967527	0.0812451	0.0880923	0.062837	0.0418502	0.097852	0.0307612	0.0770276	0.0647418	0.0600941	0.0755843	0.0304294	0.0448467	0.0198684	0.067795	0.0696417	0.0576865	0.0596837	0.0701226	0.0663696	0.066578	0.0636683	0.00889144	0.0589316	0.0703086	0.064125	0.0902915	TJP3
279	1.4248e-114	2.85625e-113	0.0840513	0.059967	0.0352036	0.0616513	0.0713697	0.0677948	0.0876679	0.0690292	0.0108758	0.0615172	0.0360057	0.0351424	0.0777872	0.0843111	0.104559	0.0206333	0.0617877	0.0524628	0.0834017	0.0610088	0.0667968	0.0843984	0.0721318	0.0817311	0.0596365	0.0691022	0.0661206	0.0765102	0.0489481	0.0840513	0.0991434	RNPEPL1
279	6.0565e-50	4.61958e-49	0.0247163	0.00800926	0.00579938	0.0271241	0.015352	0.0119577	0.0181977	0.0125698	0.00814259	0.0167822	0.0122321	0.0167597	0.00217843	0.0253322	0.0235134	0.00669859	0.0218997	0.00387375	0.0210113	0.0247163	0.0113578	0.012383	0.0169143	0.0191331	0.0107856	0.0147854	0.0255038	0.00663682	0.024531	0.0181069	0.0297164	DTX4
285	1.60808e-71	1.81895e-70	0.0615438	0.00588713	0.00339684	0.0612004	0.0181715	0.0157173	0.0451164	0.0128242	0.0522126	0.0146994	0.00552905	0.00811753	0.0174706	0.0495808	0.0302034	0.0159572	0.0550264	0.0145398	0.0430432	0.0488017	0.0223955	0.0214067	0.0308939	0.0314793	0.0287368	0.0340029	0.0477042	0.0165427	0.0469957	0.0323371	0.0615438	TLN2
285	6.36672e-126	1.45653e-124	0.098922	0.0476004	0.0340271	0.0607017	0.018371	0.0223314	0.0252222	0.027832	0.042211	0.0196481	0.0117973	0.00924519	0.0539538	0.0902258	0.0351505	0.0520243	0.00375342	0.0243273	0.0626477	0.0419876	0.0663788	0.070233	0.0711116	0.0902206	0.0358793	0.0397588	0.0397219	0.0543672	0.062102	0.09249	0.098922	SPAG9
287	2.96343e-68	3.18652e-67	0.0275984	0.0155741	0.0116943	0.0212981	0.00994262	0.00564112	0.00584733	0.0257936	0.000750223	0.00895463	0.0148856	0.0085615	0.0231455	0.0253142	0.0129595	0.00585299	0.0292018	0.0173681	0.0190231	0.0240042	0.0192636	0.0269958	0.026105	0.0289617	0.0138626	0.0176231	0.0293854	0.0176538	0.0275984	0.0282487	0.0251004	IRX5
291	1.60408e-174	5.7661e-173	0.109492	0.0614222	0.042826	0.0462888	0.0377709	0.0312157	0.0337718	0.062514	0.0133454	0.0411326	0.0388454	0.0379638	0.102077	0.0825504	0.0770394	0.0241484	0.0561821	0.06787	0.0485331	0.0829274	0.0846753	0.0910018	0.0907931	0.109492	0.0690485	0.0572857	0.059618	0.0826937	0.0743709	0.105494	0.064629	SYNJ2
294	4.1663e-96	6.7307e-95	0.0593653	0.00456724	0.000893105	0.0599492	0.0254402	0.0302304	0.0385619	0.0140464	0.0540181	0.0216773	0.0181945	0.0205035	0.029154	0.0559559	0.0127423	0.00181122	0.0716428	0.0304372	0.0695655	0.0575832	0.00581894	0.0194041	0.0372787	0.0466359	0.0366134	0.0155331	0.0455298	0.0149712	0.0593653	0.0452623	0.0777465	MYO10
295	8.00362e-70	8.82398e-69	0.039052	0.0207354	0.0145622	0.0351522	0.02503	0.024323	0.03267	0.0253009	0.0430529	0.0131459	0.0268198	0.0175435	0.0241115	0.039052	0.0306463	0.0100013	0.0248511	0.0155129	0.0367333	0.0284664	0.0262114	0.0236697	0.0265044	0.0317206	0.0161677	0.0241893	0.029672	0.0215372	0.0304131	0.0305364	0.0345034	CNNM4
296	1.07913e-47	7.86094e-47	0.091204	0.0244857	0.0244966	0.0128814	0.0307194	0.0174923	0.0342436	0.0157513	0.0380552	0.0284334	0.0353577	0.0345022	0.00458522	0.0228653	0.091204	0.0207118	0.0172639	0.00952756	0.0395213	0.0201619	0.0202921	0.0139591	0.0149276	0.0190138	0.00972993	0.0184035	0.0126791	0.0105801	0.0106488	0.0170596	0.0216971	EPHB6
296	6.16603e-49	4.60468e-48	0.0444866	0.0109443	0.00859264	0.0246471	0.0205158	0.013602	0.0187265	0.00480086	0.0467194	0.0246523	0.0331823	0.018848	0.00492749	0.0449501	0.0131002	0.0154814	0.0288774	0.0165654	0.0215313	0.0368468	0.0178012	0.00602579	0.0303202	0.0275368	0.023817	0.00318637	0.0429167	0.0208732	0.0106424	0.0293853	0.0444866	MARK3
297	4.91283e-47	3.52819e-46	0.0309897	0.0201156	0.0202494	0.000313436	0.0193796	0.0194812	0.0218237	0.0245615	0.0072282	0.018868	0.0257349	0.0206012	0.0262552	0.0214595	0.0168057	0.0214852	0.0265521	0.0273967	0.0158145	0.015758	0.0168619	0.0247446	0.0309897	0.0215649	0.028077	0.0107474	0.0309321	0.0267628	0.0242891	0.0196985	0.0221589	HDAC9
297	4.26897e-136	1.08055e-134	0.119725	0.0475862	0.0361263	0.0597721	0.0538682	0.0488588	0.0694962	0.0406037	0.0958813	0.0538636	0.05895	0.0452506	0.0434515	0.0791198	0.0906759	0.0412361	0.0683802	0.0435898	0.0938771	0.0727516	0.0572896	0.0409548	0.0622425	0.0700645	0.0410952	0.0451241	0.0675851	0.0613015	0.0584209	0.0654336	0.119725	TMEM259
298	8.25821e-105	1.49307e-103	0.130777	0.0191835	0.0108579	0.117788	0.0433579	0.0589785	0.106365	0.0429937	0.0988922	0.0444183	0.0309426	0.034597	0.0518657	0.10507	0.0114898	0.0257995	0.119282	0.0560495	0.0888734	0.0957635	0.0368907	0.0533096	0.0657719	0.0788135	0.0616696	0.0776161	0.11007	0.0504614	0.0923043	0.0772524	0.130777	DGKD
298	5.51178e-136	1.39302e-134	0.158187	0.0377949	0.0209176	0.0646101	0.0794339	0.0877511	0.10703	0.0484944	0.110267	0.0803293	0.100172	0.0825143	0.0437922	0.125306	0.0886791	0.0314745	0.112085	0.0407768	0.135891	0.110868	0.0711611	0.0428256	0.0799451	0.0889835	0.0719384	0.0458439	0.0743676	0.0626807	0.028489	0.0851044	0.158187	PCSK7
299	2.32087e-135	5.83926e-134	0.0737874	0.0164218	0.00624702	0.0858074	0.0388864	0.0393316	0.0760019	0.0296826	0.0685291	0.0313562	0.0245213	0.0311435	0.0310945	0.0773943	0.0522423	0.00563481	0.0680554	0.0169463	0.0759642	0.0737874	0.0394108	0.0314271	0.0527742	0.0512533	0.0499185	0.049745	0.0755542	0.0329759	0.0686589	0.0515178	0.0912031	PPARG
302	6.57653e-126	1.5035e-124	0.12607	0.0587206	0.0362271	0.0986726	0.106525	0.103494	0.112104	0.0727752	0.109522	0.105063	0.085814	0.0835135	0.0821326	0.10497	0.103325	0.0292496	0.0914765	0.0521679	0.115869	0.0828466	0.0763661	0.0767049	0.0912502	0.102832	0.0808886	0.0838479	0.0602051	0.0849345	0.0903876	0.103072	0.12607	GAK
303	6.11851e-74	7.20768e-73	0.0884363	0.0226503	0.0218142	0.0529646	0.0127947	0.0077694	0.039655	0.00574817	0.100027	0.0229498	0.0371121	0.0255126	0.0113365	0.0567013	0.0323136	0.0293439	0.0530024	0.0267683	0.0557929	0.0567546	0.0325451	0.0145921	0.0202644	0.0286857	0.0311447	0.0244567	0.010214	0.0311489	0.0367768	0.0307417	0.0884363	ZFC3H1
309	2.70357e-99	4.57018e-98	0.0597595	0.034773	0.0299999	0.0614626	0.0426275	0.0408431	0.0619542	0.0276779	0.0575555	0.0371188	0.0270834	0.0272875	0.0212779	0.0546185	0.0839309	0.026399	0.0521649	0.0254554	0.0632776	0.0597595	0.0376432	0.0253246	0.0368706	0.0403323	0.0411091	0.0361103	0.0421271	0.0362543	0.0518708	0.0383649	0.0650631	SHROOM1
312	1.54795e-141	4.09103e-140	0.0961125	0.0301568	0.0220353	0.106764	0.0561494	0.0496072	0.0758042	0.0371009	0.100514	0.0539172	0.0446592	0.0395895	0.0371849	0.0868405	0.0764891	0.0181169	0.0269378	0.0132356	0.0771802	0.0961125	0.0471377	0.0274787	0.0584893	0.0555866	0.0265797	0.0523682	0.0298794	0.0350209	0.082629	0.0546943	0.107839	POF1B
312	9.84456e-99	1.65249e-97	0.0769888	0.0343303	0.0305397	0.0497625	0.0494562	0.0515331	0.0232981	0.0413242	0.0825412	0.0583832	0.0127578	0.051194	0.0380294	0.0486938	0.0675895	0.0224901	0.0159415	0.0209597	0.0520181	0.048746	0.0428199	0.0108164	0.0402429	0.0373642	0.0359782	0.0290466	0.0502505	0.0399814	0.0335265	0.0377812	0.0769888	ABHD3
315	2.94489e-143	7.92663e-142	0.0754771	0.0355041	0.0242748	0.0869378	0.0486829	0.0550849	0.0575419	0.0371054	0.0620644	0.0449708	0.0394178	0.0323872	0.0557875	0.0838944	0.0473287	0.0279412	0.0445019	0.0298824	0.071144	0.0754771	0.0480126	0.0411343	0.0652758	0.0697612	0.0388782	0.036726	0.0439747	0.0431798	0.075664	0.0718595	0.0952608	CASZ1
315	5.14089e-132	1.25759e-130	0.121158	0.0404938	0.0314208	0.0736478	0.0495181	0.0588425	0.0282257	0.0227068	0.0702804	0.0439898	0.0198463	0.028639	0.0103507	0.0962486	0.0618164	0.0459161	0.0940245	0.0573897	0.0797454	0.0669765	0.054737	0.0330296	0.0677901	0.0873377	0.0572231	0.000480703	0.0379206	0.0643244	0.0709308	0.0851444	0.121158	AFF4
316	9.69588e-71	1.08213e-69	0.0321432	0.0116013	0.00829341	0.0344279	0.0292575	0.011674	0.0255942	0.000330256	0.0442331	0.0304568	0.030423	0.0320818	0.00380808	0.0270581	0.0162244	0.0063153	0.0349066	0.0186261	0.0276123	0.0321432	0.0162715	0.00716419	0.0187282	0.02236	0.0221224	0.0108811	0.0362472	0.0172805	0.023322	0.0180052	0.0394901	OTUD7B
318	4.87775e-156	1.49397e-154	0.120327	0.0836569	0.067035	0.112571	0.0809649	0.0741831	0.101286	0.0651191	0.0980525	0.0837462	0.0424645	0.0616496	0.080929	0.111168	0.101527	0.057655	0.105131	0.0640215	0.119645	0.119754	0.0917048	0.0804412	0.100438	0.109855	0.0842478	0.0749566	0.0829442	0.089047	0.120327	0.105058	0.16131	PNPLA2
318	2.67378e-99	4.5221e-98	0.091421	0.0159495	0.00919106	0.0688983	0.0507127	0.0527988	0.0473132	0.0256322	0.0742432	0.0461846	0.0273718	0.0406744	0.0240443	0.0699917	0.0252052	0.0132042	0.0570878	0.0309366	0.0800517	0.063503	0.0409317	0.0202467	0.0479947	0.0529492	0.0499441	0.0374892	0.0697369	0.0361412	0.0613061	0.0538879	0.091421	MICU1
325	6.84514e-89	1.00645e-87	0.0734376	0.0209073	0.0204435	0.0715931	0.0294029	0.0306734	0.0442441	0.0148646	0.0658212	0.0291096	0.0245205	0.0198301	0.0134024	0.0527246	0.0359711	0.0218404	0.0504179	0.0212036	0.0409924	0.0592005	0.0269286	0.00393484	0.0263921	0.0247396	0.0216702	0.0146646	0.0401227	0.0227002	0.0475003	0.0243365	0.0734376	AL390719.2
325	5.86313e-140	1.52907e-138	0.0858803	0.0428084	0.0336007	0.0894297	0.0441727	0.0406507	0.0612622	0.0525005	0.0566727	0.0481438	0.038422	0.0394812	0.0486268	0.0819734	0.0701076	0.0247948	0.0529496	0.0382022	0.0758064	0.0858803	0.0558847	0.0398082	0.0699301	0.0606956	0.0613135	0.0574915	0.0384005	0.053417	0.0780092	0.0582392	0.106352	CGN
326	5.93443e-74	6.99329e-73	0.040457	0.0210637	0.0190686	0.0443709	0.0357151	0.0260603	0.0320727	0.0211322	0.0459131	0.0290169	0.0456357	0.0267315	0.0206309	0.0392623	0.0265316	0.0161081	0.0288657	0.00453718	0.0381002	0.040457	0.0276819	0.0187522	0.0268772	0.0261206	0.0201956	0.0254316	0.0358477	0.0166366	0.0363144	0.0266748	0.042661	ATP10B
326	7.06214e-163	2.31299e-161	0.0922669	0.0131091	0.00247021	0.0710867	0.0316074	0.0296461	0.0394329	0.043414	0.00327837	0.0367135	0.0398972	0.037745	0.0596	0.0740938	0.044755	0.00611904	0.0174764	0.0220345	0.0464384	0.0419271	0.0152744	0.0832806	0.0722713	0.0922669	0.0300005	0.0448167	0.00480227	0.0481286	0.0740159	0.0906899	0.0710425	MIR22HG
333	5.35552e-77	6.62047e-76	0.0624703	0.0131829	0.00918545	0.03951	0.0224706	0.0180844	0.0429696	0.0133082	0.023023	0.0298879	0.0190584	0.0234706	0.0152224	0.0436341	0.0417601	0.00572928	0.0550387	0.0271668	0.0464853	0.039377	0.0236176	0.0187659	0.02851	0.0348871	0.0370862	0.0248708	0.0520393	0.028047	0.0392617	0.035689	0.0624703	SP1
333	3.94146e-127	9.16704e-126	0.0789731	0.0408654	0.0285078	0.0468383	0.0324798	0.0369547	0.0302619	0.0538292	0.00671913	0.0296521	0.0215239	0.0141411	0.0538105	0.0638714	0.0726956	0.0128325	0.0253455	0.0294128	0.0793733	0.0462332	0.0589653	0.0483212	0.0554098	0.0761971	0.0478129	0.0255156	0.0211105	0.0534587	0.0486389	0.0745909	0.0789731	CHMP1A
334	3.56907e-79	4.54785e-78	0.0538707	0.0164568	0.0153606	0.0581291	0.0367449	0.0389477	0.0396732	0.0266812	0.0954088	0.028991	0.064094	0.0467381	0.00681072	0.0519153	0.0297996	0.0159492	0.0235283	0.0144168	0.0431946	0.0286512	0.02418	0.0137024	0.0248557	0.0362439	0.0203309	0.0192281	0.0133634	0.021492	0.0350403	0.0357682	0.0538707	DOCK5
334	5.21259e-135	1.30853e-133	0.058675	0.0339958	0.0219654	0.0483465	0.0402137	0.0421518	0.0477294	0.053449	0.0676563	0.0410212	0.044382	0.0414484	0.0505959	0.0500028	0.063226	0.00850434	0.0190851	0.0242934	0.0498241	0.0394018	0.0409586	0.0534456	0.0502309	0.0571518	0.0214392	0.0433687	0.0325067	0.0347372	0.058675	0.0569656	0.0541599	SRC
336	2.99306e-60	2.80159e-59	0.0351684	0.0198809	0.014516	0.0525558	0.0216706	0.0315945	0.0600075	0.0173215	0.0427097	0.0204832	0.0114932	0.0111962	0.0166226	0.0421975	0.0336047	0.00801442	0.0348302	0.0223421	0.0546939	0.0351684	0.0238839	0.0139346	0.0262654	0.0252159	0.0264639	0.0285732	0.0260451	0.0199282	0.0345962	0.0242946	0.0472331	SLC26A9
340	5.94632e-99	1.00165e-97	0.0479	0.0201548	0.0121663	0.0477542	0.00929939	0.00962544	0.0392385	0.019538	0.0182343	0.00448145	0.0179752	0.000528333	0.0206085	0.0479	0.0386479	0.0125523	0.0484262	0.0319954	0.0386695	0.0460058	0.0301606	0.0397334	0.0429584	0.0507389	0.0289288	0.0350836	0.0499326	0.034545	0.0484027	0.0509092	0.0540211	TNKS1BP1
347	1.38107e-108	2.61538e-107	0.0681218	0.0123943	0.00187178	0.0733043	0.0309593	0.0358104	0.0645074	0.0319939	0.0482597	0.0395484	0.0360596	0.0368295	0.0304278	0.0685041	0.0351647	0.00937681	0.0391617	0.0119481	0.0720243	0.0681218	0.030348	0.0386089	0.0496357	0.0586089	0.019549	0.0376483	0.0351548	0.0138198	0.0624418	0.057852	0.0737323	AKAP1
350	2.29261e-69	2.50945e-68	0.0582142	0.0208776	0.020391	0.0349098	0.0312872	0.024033	0.0347987	0.00580211	0.0510343	0.0334735	0.0307321	0.0329351	0.00129145	0.0410696	0.0369981	0.0212081	0.0368698	0.0149763	0.043237	0.0399826	0.0238296	0.00237649	0.0169007	0.0221015	0.0204152	0.00987476	0.0412944	0.0161202	0.0269862	0.0209589	0.0582142	RNPC3
353	1.26913e-145	3.51769e-144	0.0717155	0.0550519	0.0312616	0.0573991	0.0448673	0.0467342	0.0635793	0.0756624	0.0367955	0.0312773	0.0342925	0.013525	0.0719877	0.0647895	0.077657	0.0129561	0.057906	0.0509528	0.06902	0.065722	0.0664624	0.0811258	0.0759455	0.0817763	0.0586665	0.0674155	0.0679994	0.0665782	0.0717155	0.0817644	0.0628062	TMEM63B
354	4.18433e-51	3.27195e-50	0.0445911	0.00629865	0.00782569	0.0408731	0.0171992	0.0296385	0.0163779	0.0144034	0.01615	0.0212273	0.0193851	0.0211898	0.0149044	0.0335818	0.0476766	0.0146255	0.0442117	0.0220614	0.0260049	0.027843	0.0132094	0.00858233	0.0216004	0.0202997	0.0261686	0.014167	0.0409814	0.0147091	0.0255784	0.0192004	0.0445911	LINC00342
356	6.7771e-89	9.96887e-88	0.0783935	0.0392228	0.0367991	0.0439651	0.0439123	0.0453245	0.0690252	0.0285558	0.0589248	0.0480429	0.0534791	0.0452794	0.0222146	0.0483619	0.0844474	0.0376297	0.0770784	0.037283	0.0783935	0.0218307	0.0442828	0.0316864	0.0411651	0.0423248	0.065665	0.0415072	0.0601705	0.0448291	0.0351697	0.0394609	0.0820982	TCIRG1
356	2.22472e-52	1.78286e-51	0.0256691	0.011141	0.00638206	0.0196269	0.0126599	0.00903054	0.0132351	0.00701453	0.00900344	0.0145199	0.0151412	0.0150932	0.0149935	0.0314215	0.0235653	0.00807963	0.0205511	0.0132388	0.0195544	0.0193494	0.0157055	0.0156506	0.0195861	0.0294508	0.00510265	0.0146371	0.0234061	0.0184095	0.0173724	0.0281079	0.0256691	MON1B
364	7.00375e-128	1.64836e-126	0.065253	0.00509159	0.000388615	0.070009	0.0492256	0.042257	0.0582694	0.0456286	0.0788835	0.0573996	0.0760454	0.0690938	0.0247308	0.0668481	0.064294	0.00262187	0.0265508	0.0120999	0.0518321	0.065253	0.0316953	0.0325721	0.0536744	0.0515017	0.0333693	0.0380425	0.0304817	0.0277637	0.0572905	0.0491021	0.0653681	LGR4
367	3.61864e-60	3.38244e-59	0.0383246	0.0152443	0.0121722	0.00563724	0.0110706	0.0112119	0.02374	0.00797434	0.0191654	0.016582	0.0251604	0.0183495	0.00936623	0.0239974	0.0303357	0.00648877	0.0498333	0.0227872	0.03109	0.0174742	0.0166407	0.00933116	0.0141931	0.0187478	0.0358511	0.0138088	0.0368588	0.0178439	0.00322235	0.0176586	0.0383246	PACS1
368	1.29692e-114	2.603e-113	0.0641209	0.00875566	0.00834268	0.0811547	0.0238422	0.0374306	0.0707294	0.03006	0.0408367	0.0251004	0.0188581	0.0170429	0.0278772	0.0665782	0.0173849	0.0115737	0.0454505	0.0169924	0.0530111	0.0641209	0.0162025	0.0274366	0.042433	0.0443417	0.0201048	0.041448	0.0253807	0.0133341	0.0585624	0.041631	0.0705152	SH2D4A
373	1.12968e-121	2.47628e-120	0.0742227	0.0238397	0.0186761	0.0518487	0.0279386	0.0315053	0.0566676	0.0324747	0.0237799	0.0449519	0.0124113	0.0338789	0.0472861	0.0583674	0.0436683	0.0217616	0.0363511	0.0231186	0.0353322	0.0463296	0.0311329	0.0452659	0.0455185	0.0573874	0.0277489	0.0412929	0.0330828	0.0271599	0.042855	0.0558384	0.0742227	ARRDC1
374	3.36805e-91	5.12047e-90	0.0670683	0.025317	0.0174492	0.0602722	0.0477064	0.0361185	0.0401243	0.00362021	0.0104178	0.0499243	0.0686799	0.0564733	0.0109562	0.0718803	0.0752465	0.0134132	0.0183749	0.0141911	0.0711638	0.0391332	0.0352782	0.0205169	0.0409269	0.0549175	0.0164021	0.0252943	0.00496248	0.0379302	0.0103083	0.0505639	0.0670683	APOL6
374	2.79344e-25	1.16092e-24	0.0153981	0.00702317	0.00223928	0.00492558	0.00603554	0.0038523	0.0093182	0.00845059	0.00434625	0.00573755	0.00514468	0.00293536	0.00817893	0.00992339	0.00377561	0.00153831	0.016621	0.0102643	0.0103702	0.00324707	0.00997529	0.0110302	0.00568545	0.0150999	0.011191	0.00839375	0.0159769	0.0120488	0.00892509	0.0144621	0.0153981	MKL1
376	6.48914e-85	8.97084e-84	0.0438065	0.0206392	0.0127351	0.0383046	0.024	0.0279545	0.0514599	0.0372389	0.0405785	0.0190555	0.0280394	0.00991804	0.0336719	0.0427768	0.0707946	0.00277396	0.0445222	0.0341222	0.0555127	0.0360533	0.03562	0.0423667	0.0346768	0.0448577	0.0396744	0.0427908	0.0410428	0.0352953	0.0438065	0.0468985	0.0499383	TSKU
377	1.20586e-40	7.50738e-40	0.068567	0.0126506	0.0091901	0.0177979	0.0308747	0.029001	0.0329394	0.0105747	0.0123335	0.0214418	0.00155526	0.00547137	0.00828025	0.0157973	0.068567	0.00646106	0.0127015	0.00512256	0.0310634	0.0101428	0.0121342	0.0065466	0.00983527	0.0133053	0.00685144	0.0117325	0.010091	0.00489909	0.0116533	0.0138901	0.0150043	SCNN1G
377	4.2207e-121	9.17989e-120	0.102991	0.0435921	0.0373575	0.0489639	0.0398775	0.0319986	0.0598024	0.0326549	0.0665655	0.0409514	0.0220627	0.0366494	0.0330304	0.0772931	0.066023	0.0409823	0.0415843	0.0263599	0.0773347	0.0498983	0.0490773	0.033165	0.0484327	0.0732071	0.02839	0.0253858	0.0535445	0.0461209	0.0305493	0.0703233	0.102991	CSNK1D
378	6.14044e-113	1.21069e-111	0.0527895	0.0211166	0.0160427	0.0430493	0.052017	0.0363375	0.0402971	0.0267639	0.0474707	0.0485965	0.0669101	0.0360763	0.0422699	0.0454366	0.048207	0.00872028	0.0313978	0.0342878	0.044789	0.0527895	0.0292493	0.0363886	0.0573022	0.0461119	0.0498418	0.0397391	0.0356288	0.0466835	0.0502136	0.0457574	0.0565635	PCDH1
378	2.27583e-112	4.45574e-111	0.0737375	0.0450994	0.0377655	0.0635152	0.0467656	0.0541817	0.07913	0.0439052	0.0965946	0.0500353	0.0821545	0.0591436	0.0280964	0.0830687	0.0852037	0.0411826	0.0861892	0.050027	0.091161	0.0619085	0.0555936	0.0418568	0.0656121	0.0739125	0.0694791	0.0592272	0.0659084	0.0573512	0.0720401	0.0737375	0.104465	STAT6
383	6.44258e-37	3.66658e-36	0.0254152	0.00625434	0.0043201	0.0122985	0.00682366	0.00670315	0.00963454	0.00563856	0.0101678	0.00881257	0.00923708	0.00350702	0.0130037	0.0180666	0.0210626	0.00858902	0.0145442	0.0102851	0.0163627	0.0106762	0.00931486	0.00950765	0.0165882	0.0128939	0.00846926	0.00273092	0.0220319	0.00943094	0.0171449	0.0161702	0.0254152	ZMIZ2
386	3.21537e-120	6.9304e-119	0.0888519	0.0319984	0.0267157	0.0615844	0.0203673	0.0239476	0.0402365	0.0222255	0.0498828	0.0146732	0.0246497	0.0171369	0.0281794	0.0617404	0.0533107	0.0290609	0.0746948	0.0398651	0.064777	0.052523	0.0442881	0.0296679	0.0328906	0.0490426	0.0498824	0.0348474	0.0603156	0.0415731	0.0371076	0.0476199	0.0888519	DIP2A
387	4.29274e-120	9.2407e-119	0.132953	0.0416656	0.0410882	0.0403442	0.0338014	0.0432398	0.0462124	0.00970171	0.0978025	0.0333033	0.0469154	0.0341753	0.00628672	0.0892391	0.082033	0.0464921	0.0710462	0.0489415	0.0857192	0.0830553	0.0444712	0.00638794	0.0450368	0.0478585	0.0568066	0.0229954	0.0622839	0.0493861	0.0338617	0.0462612	0.132953	ZNF292
388	1.97918e-118	4.16947e-117	0.10952	0.0339111	0.0291997	0.0880852	0.0529796	0.0571778	0.0739643	0.0295537	0.0762039	0.0491614	0.0305697	0.0391797	0.0281207	0.0669592	0.061668	0.030783	0.1071	0.0363406	0.0922122	0.0647212	0.0420993	0.0141518	0.0482461	0.042116	0.0340466	0.0425809	0.0769334	0.0426544	0.0644288	0.0398633	0.10952	FAM83E
394	2.23527e-125	5.09283e-124	0.0525627	0.0069311	0.00300325	0.0406776	0.00852833	0.0134475	0.0207493	0.0523887	0.0164019	0.00909166	0.00484145	0.00539221	0.0507516	0.0478661	0.0105283	0.00529599	0.0431794	0.0273156	0.032021	0.0486633	0.0323471	0.0457216	0.0507156	0.0569049	0.0095052	0.0270807	0.0394023	0.0346256	0.0525627	0.0566564	0.042167	C3orf52
400	1.10826e-60	1.04701e-59	0.0399988	0.0166416	0.0151084	0.0103947	0.026726	0.00463864	0.0168871	0.0363691	0.0314799	0.0340461	0.0550935	0.043713	0.0323763	0.022289	0.0144604	0.00882236	0.00844788	0.020579	0.0185983	0.0219413	0.0247374	0.0457578	0.0327205	0.0397068	0.0181369	0.0303438	0.0189316	0.0210755	0.0239085	0.0399988	0.0213351	BBC3
402	3.30768e-118	6.94198e-117	0.109478	0.0279803	0.0196215	0.0399829	0.00813555	0.00871379	0.0541693	0.061665	0.0135617	0.0550937	0.0794072	0.07263	0.0146165	0.0808686	0.0485624	0.026078	0.0410368	0.00050868	0.07535	0.0535555	0.0481852	0.0453645	0.0312236	0.0715432	0.0256558	0.034774	0.0136626	0.0275631	0.0530232	0.0714144	0.109478	NT5C
403	5.05848e-118	1.05768e-116	0.099855	0.0295046	0.0147768	0.0517306	0.0472587	0.0487634	0.0441514	0.0392607	0.0175501	0.0762301	0.10468	0.0916829	0.0602358	0.0633904	0.0311489	0.0200234	0.0269495	0.0248119	0.0666172	0.0217147	0.0597269	0.0564273	0.0408887	0.0704914	0.0516082	0.0165585	0.0261249	0.0401533	0.0241526	0.068708	0.099855	TMEM160
404	7.07356e-119	1.49958e-117	0.05609	0.0318427	0.0213315	0.0628513	0.0354729	0.0206401	0.0467138	0.0296965	0.030913	0.0463548	0.0386985	0.0412572	0.0360417	0.0527691	0.0557217	0.0175231	0.036514	0.0206772	0.0554489	0.05609	0.0378251	0.0287516	0.0444928	0.0456674	0.0380134	0.0291621	0.038444	0.0412025	0.0505368	0.0432058	0.0644841	ITGA3
406	7.29928e-45	4.99803e-44	0.0440128	0.00880679	0.00836385	0.0277914	0.0142855	0.0157222	0.0265137	0.00531596	0.0217603	0.0125767	0.00856949	0.00910393	0.00158839	0.0298075	0.0161236	0.00863183	0.0364748	0.0147599	0.0329079	0.0211066	0.0126524	0.00139504	0.0104767	0.0178467	0.0208355	0.00806371	0.0397613	0.0115191	0.0120951	0.0184428	0.0440128	ZNF609
407	3.58909e-83	4.84e-82	0.0592657	0.0302689	0.0261033	0.0431337	0.0524647	0.038413	0.0479388	0.0271068	0.0160894	0.0556689	0.0520437	0.0495189	0.0252995	0.0412805	0.0566035	0.0180312	0.026897	0.00329959	0.0514855	0.041295	0.0349493	0.0105702	0.037126	0.0293421	0.0319191	0.0184974	0.0265707	0.0300685	0.0413173	0.0276291	0.0592657	B3GALT5
418	6.08144e-108	1.14777e-106	0.075477	0.0281386	0.0125687	0.0603629	0.0458171	0.0399216	0.0321401	0.0459533	0.0179688	0.0492363	0.0384477	0.0456878	0.024832	0.081149	0.0624091	0.000381254	0.0414973	0.0179643	0.0651406	0.0485642	0.0448384	0.0173599	0.0601353	0.075477	0.0321396	0.00883557	0.022771	0.0395713	0.0639393	0.0763756	0.0728766	NPTN
419	2.18557e-52	1.75232e-51	0.0299407	0.0161206	0.0110246	0.0219201	0.0282633	0.0286607	0.0230087	0.0229484	0.0308224	0.0261903	0.0335071	0.0278836	0.0206712	0.0212611	0.0353699	0.0123145	0.0232402	0.0117328	0.0265647	0.0208691	0.0201247	0.0254048	0.0230983	0.0279979	0.0190453	0.0191986	0.029629	0.0166296	0.0256159	0.0269827	0.0299407	NOXA1
421	4.72142e-112	9.19554e-111	0.0994781	0.0276487	0.0277683	0.0824137	0.0278706	0.0225422	0.0601855	0.0203476	0.0861381	0.028442	0.0267841	0.0257007	0.00521503	0.0687742	0.0468613	0.0250848	0.0799929	0.0320593	0.0729728	0.0752014	0.0385443	0.0118936	0.040735	0.0377545	0.0614929	0.00128439	0.0596607	0.0341228	0.0640779	0.03388	0.0994781	PLCE1
421	6.66089e-30	3.15349e-29	0.0169976	0.0169976	0.0136973	0.00283094	0.0106721	0.0117396	0.00554266	0.0115617	0.0154291	0.0121192	0.00953603	0.00986574	0.00824958	0.0144111	0.0162921	0.0166998	0.00551246	0.00649599	0.0153159	0.0156073	0.0175833	0.00807556	0.00991363	0.0118948	0.00928776	0.00238107	0.00345852	0.0131983	0.0136966	0.00779892	0.0183746	ZNF821
424	1.89598e-54	1.58454e-53	0.0205607	0.0157308	0.0120193	0.020141	0.0110295	0.0130058	0.0161326	0.0199286	0.0205196	0.0148213	0.00794126	0.0134662	0.0195354	0.0191308	0.0413188	0.00463077	0.0177221	0.012758	0.0179402	0.0205607	0.0186244	0.0199133	0.021343	0.0193205	0.0154934	0.0189012	0.0201559	0.0184388	0.0214731	0.0193078	0.0202806	LINC01559
432	2.67667e-30	1.27878e-29	0.015961	0.00582923	0.00453496	0.00958485	0.00836292	0.00659474	0.0082407	0.00177215	0.00507831	0.00812189	0.0047935	0.00729947	0.00361577	0.0116065	0.00966206	0.00439637	0.0134356	0.00614603	0.0120012	0.00827232	0.00648963	0.00587442	0.00887868	0.00963442	0.00718285	0.00315058	0.0111174	0.0081419	0.00870196	0.0103137	0.015961	VPS39
433	4.15806e-107	7.7517e-106	0.0478031	0.0325116	0.0177279	0.0434741	0.0350204	0.047106	0.046752	0.048311	0.0574828	0.023388	0.000220973	0.0123788	0.049969	0.0443399	0.02524	0.00765473	0.0245789	0.0270026	0.0458328	0.0403971	0.0385616	0.043177	0.0477019	0.0455283	0.0316169	0.0405473	0.0203879	0.0408223	0.0478031	0.0450704	0.0542719	BX255925.3
435	9.15253e-111	1.76412e-109	0.0522166	0.0302407	0.0255266	0.057856	0.0427126	0.0464076	0.0463374	0.0442634	0.0643789	0.0478092	0.055681	0.0559948	0.0440079	0.0533345	0.0479054	0.0214933	0.0179364	0.0253985	0.0648121	0.0522166	0.038577	0.0226336	0.0485969	0.045764	0.0465129	0.0340565	0.0224	0.046937	0.052677	0.0448965	0.0667903	PTPRH
439	1.59797e-112	3.13591e-111	0.0671087	0.0347486	0.0257531	0.0462676	0.0270033	0.0286757	0.0342181	0.0502853	0.0330149	0.0240378	0.0232844	0.0177798	0.0473882	0.0594921	0.0663535	0.0158072	0.0296114	0.0292495	0.0552968	0.0428473	0.0460473	0.041185	0.0510344	0.0571272	0.0336948	0.0365301	0.0389838	0.0424317	0.0574093	0.0562031	0.0671087	PRKCD
439	2.57752e-95	4.13414e-94	0.10123	0.0170488	0.0132546	0.0601555	0.0418531	0.0473711	0.0684026	0.028304	0.0184619	0.0394365	0.0334017	0.0141148	0.0300269	0.0899191	0.0626425	0.0155722	0.0491275	0.0132633	0.0972347	0.0566626	0.0371551	0.0342584	0.0504761	0.0763633	0.0128968	0.0302028	0.0489945	0.0364252	0.0372487	0.0742647	0.10123	ZBTB7A
441	1.80048e-62	1.75281e-61	0.0562082	0.00947414	0.00712486	0.0171049	0.0161219	0.0105765	0.0253679	0.00524685	0.0323041	0.0184972	0.0239908	0.0125754	0.0109847	0.0374735	0.0164192	0.00439441	0.0384474	0.0142878	0.0355919	0.0195293	0.0182965	0.01254	0.0206308	0.0244609	0.00726386	0.0104379	0.0447389	0.0212711	0.0205901	0.0221534	0.0562082	AP3B1
443	2.04741e-65	2.10503e-64	0.0454829	0.021754	0.0188652	0.0370372	0.023041	0.0185671	0.0290598	0.0264701	0.055819	0.0312915	0.0468442	0.0338462	0.0322771	0.0454829	0.0511666	0.0187769	0.0408003	0.0199089	0.0385789	0.0406927	0.0265658	0.0207183	0.0250176	0.0385588	0.0314595	0.0191007	0.0282343	0.0263091	0.0235994	0.0376798	0.0490526	AP1G2
445	2.11063e-109	4.02883e-108	0.0525905	0.0196461	0.0138014	0.0577995	0.0140296	0.0276641	0.0296656	0.0218983	0.0209346	0.0174245	0.032827	0.0177175	0.026685	0.048124	0.0494354	0.0155223	0.0420342	0.0230619	0.0404918	0.0525905	0.0271034	0.0296718	0.0440125	0.0432766	0.022287	0.0259842	0.0328475	0.0211904	0.0516189	0.0422947	0.0612483	TACC2
448	1.68685e-71	1.90612e-70	0.0389034	0.0210195	0.00987629	0.0445364	0.0255221	0.028984	0.0262396	0.0277464	0.0330292	0.0221342	0.0211529	0.021472	0.0305924	0.0398928	0.0281807	0.00801597	0.0476854	0.0246787	0.028125	0.0325634	0.0286076	0.0321045	0.0324414	0.0382733	0.0285382	0.0291238	0.0456068	0.0265439	0.0389034	0.0386784	0.043407	SLC45A4
449	1.53673e-93	2.39716e-92	0.0462383	0.011395	0.00381395	0.0448132	0.0313103	0.0260096	0.0381445	0.0388368	0.0210633	0.0427184	0.0618352	0.0541666	0.0360834	0.0462383	0.0399194	0.000801723	0.0314736	0.0269889	0.0328013	0.043076	0.0169743	0.0357767	0.0410991	0.044747	0.0233532	0.0371188	0.0229832	0.0340644	0.0418385	0.0432743	0.0401654	ITGB6
450	2.48258e-98	4.14644e-97	0.0736701	0.0252566	0.0225263	0.0643056	0.0278816	0.0246549	0.0492033	0.0261311	0.0295731	0.0288757	0.0220685	0.0218366	0.020913	0.054582	0.0458316	0.0227346	0.0641637	0.0127986	0.0622036	0.0549618	0.0325206	0.0156835	0.0381453	0.0321347	0.0371923	0.0306075	0.0372718	0.0342401	0.0450861	0.0343023	0.0736701	AC009133.1
460	6.42859e-48	4.70336e-47	0.0363366	0.0209705	0.0182748	0.0443982	0.0405867	0.0406424	0.0438431	0.00606831	0.03594	0.030366	0.0148005	0.0209388	0.0103716	0.0345697	0.0296347	0.0223773	0.0386017	0.0160792	0.0354876	0.0363366	0.0234187	0.00857879	0.0164401	0.0173668	0.0230816	0.0203297	0.0266842	0.0175784	0.0302393	0.0172577	0.0502674	AC020911.2
461	4.53373e-56	3.91282e-55	0.0687218	0.0131405	0.0130397	0.0393558	0.0249815	0.0123179	0.0441102	0.00303316	0.0704832	0.0338445	0.0481837	0.0341406	0.0117786	0.0571233	0.0336035	0.0226744	0.0475933	0.0152496	0.053428	0.0435753	0.0234073	0.0115086	0.026268	0.0343223	0.0133317	0.0106836	0.0451245	0.0179782	0.0170793	0.0371539	0.0687218	NFATC2IP
462	1.31098e-107	2.4618e-106	0.104063	0.0389807	0.0337219	0.0493773	0.0407642	0.0183808	0.056774	0.0204569	0.0771522	0.0474743	0.0632728	0.0539711	0.0233901	0.0574097	0.0751448	0.0394396	0.0705534	0.0329495	0.0728729	0.0618949	0.0480097	0.0245001	0.0352415	0.0447834	0.0364696	0.0312298	0.07674	0.0395231	0.0379942	0.045942	0.104063	IRF3
466	1.38494e-97	2.28809e-96	0.0492581	0.0229098	0.0189642	0.0504553	0.0232468	0.0265074	0.0447464	0.0307566	0.0419311	0.0278885	0.0257901	0.0243546	0.033026	0.0461406	0.0484393	0.0182324	0.0167285	0.014929	0.0536744	0.0492581	0.0326044	0.0293109	0.0422479	0.0376278	0.0380147	0.0383474	0.0306618	0.028521	0.0476669	0.038704	0.0570145	GSDMB
473	4.54121e-95	7.25253e-94	0.0834283	0.0235104	0.0190448	0.0539855	0.0193628	0.0213888	0.0510306	0.0158721	0.0663195	0.0237981	0.0249753	0.026925	0.022923	0.0603683	0.0535017	0.0189439	0.0667204	0.0305211	0.0802914	0.0505332	0.0364075	0.0198652	0.0430535	0.0417436	0.0511684	0.0420784	0.0734903	0.0468257	0.0419944	0.0400359	0.0834283	DDX60L
479	9.41174e-58	8.40167e-57	0.0318003	0.0181098	0.0147679	0.0283807	0.0183385	0.0112342	0.0179153	0.00363531	0.0128993	0.0184853	0.0235051	0.0151605	0.012758	0.0318003	0.0492446	0.0158528	0.0222913	0.0139363	0.0323253	0.0140346	0.0171229	0.0142279	0.027439	0.0269617	0.016905	0.0113961	0.0370032	0.0199598	0.0179844	0.026529	0.0441843	IGF2R
483	1.89312e-106	3.50395e-105	0.0484475	0.0151322	0.00560428	0.0441905	0.0288508	0.0289676	0.0604025	0.0391383	0.0224715	0.0270598	0.0154405	0.0224959	0.0350083	0.0504503	0.0558237	0.00338511	0.0185284	0.0280708	0.0354185	0.042996	0.0231792	0.0464836	0.0449053	0.0464869	0.0105742	0.0458259	0.0292946	0.0337648	0.0484475	0.0447076	0.0427761	KAZALD1
486	6.3073e-107	1.17324e-105	0.0574853	0.0409909	0.0325038	0.0384376	0.0423035	0.0481465	0.0255353	0.046267	0.0543586	0.0498442	0.0560022	0.0520338	0.00156946	0.0433536	0.0203227	0.00663711	0.0255463	0.0282171	0.0561957	0.032643	0.0434891	0.0185144	0.0394794	0.0576359	0.0617967	0.0360671	0.0489327	0.0500885	0.0574853	0.057661	0.0693969	SMPDL3A
488	1.37399e-70	1.53042e-69	0.048599	0.0286912	0.021358	0.0284823	0.0377169	0.035723	0.0239881	0.0224945	0.0531902	0.0285066	0.0423865	0.0258635	0.0233898	0.038991	0.0429705	0.0275047	0.0453206	0.0202471	0.0376624	0.0323604	0.0295501	0.0263942	0.0317622	0.0357884	0.0288108	0.0163762	0.042197	0.0251154	0.0336549	0.0340212	0.048599	CLASRP
489	7.62265e-90	1.13848e-88	0.0632001	0.0226577	0.012237	0.0455814	0.039119	0.0308161	0.0405027	0.0295626	0.0270102	0.0333737	0.0358865	0.0319241	0.0389412	0.0610451	0.0321053	0.00505962	0.0349234	0.0213105	0.0523206	0.0383368	0.0395644	0.0384556	0.0578877	0.0655954	0.0370169	0.0291144	0.0243936	0.0414466	0.0389651	0.0632001	0.0697426	RAB1B
495	8.86648e-106	1.62228e-104	0.106378	0.0261073	0.0254361	0.0664134	0.0271309	0.0232552	0.0384318	0.00494508	0.0941836	0.0226535	0.00696158	0.0123416	0.013878	0.0850778	0.0398151	0.0379073	0.0726319	0.0292213	0.0672918	0.0752829	0.0329128	0.00891092	0.0377836	0.0522911	0.0216864	0.00355326	0.0506218	0.0272814	0.068878	0.0517259	0.106378	RERE
496	1.01793e-105	1.86046e-104	0.0704944	0.0307462	0.0258145	0.0458127	0.0568501	0.04927	0.0437591	0.00906532	0.0706141	0.0478014	0.0656544	0.0503032	0.0158618	0.0517147	0.0571249	0.0294555	0.0597532	0.0290654	0.0486088	0.0449807	0.0334788	0.0095112	0.0399541	0.0390955	0.0324438	0.00752361	0.0402681	0.0345079	0.0373705	0.0388681	0.0704944	TSC2
504	9.39019e-105	1.6959e-103	0.0751906	0.0278775	0.0203804	0.0654383	0.0463036	0.0369734	0.0476522	0.0410089	0.0213896	0.0534331	0.0647835	0.0492599	0.0331345	0.0668123	0.0463663	0.0231217	0.0382191	0.0315467	0.051736	0.0648195	0.0332737	0.0175558	0.0473159	0.0492893	0.0229669	0.0327449	0.0218232	0.0377725	0.0478049	0.0473138	0.0751906	B4GALT4
507	9.05477e-32	4.50228e-31	0.029044	0.0138221	0.0123874	0.0158436	0.0181767	0.0140272	0.0164505	0.00774946	0.0436652	0.0139662	0.0311809	0.0213062	0.00585113	0.0241648	0.0229885	0.0129394	0.0284299	0.0172743	0.025617	0.0214829	0.0135805	0.0075542	0.0178939	0.0213601	0.0163543	0.00429955	0.0292366	0.0175621	0.0129375	0.0196081	0.029044	GIGYF1
507	1.56409e-58	1.41583e-57	0.0391402	0.0186264	0.0149673	0.0339371	0.0304993	0.0186497	0.0394144	0.0360674	0.00763658	0.0306485	0.0300011	0.0250144	0.0332075	0.0366493	0.0637197	0.0152776	0.0276515	0.01248	0.0446179	0.030445	0.0225851	0.0259605	0.0391402	0.0382827	0.0136363	0.0187969	0.0264711	0.0200935	0.0368131	0.0375265	0.0494099	ENTPD6
508	1.79262e-74	2.12968e-73	0.0814453	0.0300326	0.0251556	0.0412398	0.0261003	0.0255531	0.035258	0.0127686	0.115049	0.00715193	0.0410171	0.0169966	0.00965861	0.06376	0.0497275	0.0307697	0.0641169	0.0280726	0.0447743	0.0583955	0.0353125	0.0222729	0.0327493	0.0420672	0.0324634	0.017675	0.0528024	0.0347404	0.0347896	0.0402007	0.0814453	CCNL2
509	1.29965e-71	1.47306e-70	0.0559299	0.0149229	0.00881435	0.0424824	0.0157596	0.021034	0.0362831	0.0222944	0.0275686	0.0166806	0.0167533	0.0175292	0.0198594	0.0428611	0.0386807	0.00708956	0.0407324	0.013041	0.0436679	0.0447263	0.0248787	0.0136763	0.0278956	0.0299814	0.00829011	0.00919113	0.0119688	0.0232554	0.04132	0.0283706	0.0559299	FARP2
514	5.76425e-92	8.81539e-91	0.0537203	0.0154752	0.0141265	0.0487202	0.0306973	0.0220303	0.0401639	0.0571221	0.0331883	0.034607	0.0500435	0.0405641	0.0563362	0.0558457	0.0413801	0.0158561	0.0386581	0.0316594	0.0406964	0.0537203	0.020713	0.045043	0.0561814	0.0614468	0.0408585	0.0457309	0.0410381	0.0475047	0.0491007	0.0588339	0.0442654	LAMC2
524	5.35726e-49	4.00427e-48	0.0817714	0.0348062	0.0296033	0.0558507	0.07437	0.0716737	0.0659529	0.0215738	0.0862332	0.0723532	0.0511451	0.0573342	0.00985374	0.0483376	0.0633234	0.0404363	0.0332404	0.00655742	0.0577074	0.0593099	0.0373105	0.0197985	0.0386777	0.0359117	0.0145585	0.0322574	0.0165313	0.0270901	0.0269542	0.0306259	0.0817714	CSKMT
532	6.66357e-84	9.08467e-83	0.051582	0.0167549	0.0111302	0.0433141	0.0230764	0.0277828	0.0411725	0.0223556	0.0451399	0.026906	0.0297367	0.0321142	0.0243691	0.051582	0.0423928	0.00681894	0.0111234	0.0121939	0.0506071	0.032941	0.0269384	0.0214275	0.015047	0.0398533	0.0186001	0.0318265	0.0138575	0.0241055	0.0326097	0.0353765	0.0503567	PARP4
538	3.29524e-54	2.73961e-53	0.0383418	0.0141796	0.0134772	0.0402577	0.0245248	0.0170674	0.0354059	0.0116384	0.0359719	0.0258892	0.0153785	0.0228974	0.00536917	0.0367632	0.0328931	0.0148516	0.0405065	0.0217393	0.0445018	0.0293912	0.0229417	0.0111719	0.0300051	0.0260875	0.0396655	0.0221198	0.0346391	0.0237902	0.0383418	0.0253724	0.0532232	ITSN1
539	3.35595e-32	1.69557e-31	0.0225914	0.00568935	0.00498875	0.00773869	0.0102359	0.0141206	0.00827092	0.00859185	0.0169941	0.0114107	0.0210243	0.0142694	0.00650769	0.0106316	0.0260807	0.010501	0.0204691	0.0057604	0.0140238	0.00896631	0.00702232	0.00700301	0.0126755	0.0112574	0.00884021	0.00483933	0.0243633	0.0092087	0.0121408	0.00890964	0.0225914	ATP13A1
540	1.20697e-94	1.91755e-93	0.0528181	0.0256236	0.0210395	0.0440546	0.0324347	0.035947	0.0449642	0.0235511	0.0504662	0.0258454	0.0108366	0.00959526	0.0345048	0.0528258	0.0297147	0.0275635	0.0528566	0.0236524	0.0394442	0.0528181	0.0233864	0.0170977	0.0442548	0.0412838	0.0356955	0.0253004	0.042415	0.031389	0.0447018	0.0439922	0.0529797	HIP1R
541	1.50785e-94	2.3899e-93	0.0569116	0.0256121	0.020707	0.0545637	0.0330159	0.0322253	0.041245	0.03244	0.0438275	0.0360969	0.0336417	0.030056	0.0227622	0.0517041	0.0417738	0.0200344	0.0485351	0.0295331	0.0100317	0.0569116	0.0106988	0.018593	0.0409513	0.0487248	0.0495864	0.0318665	0.0434844	0.0327429	0.0543977	0.0479559	0.0715526	PDGFA
542	4.22332e-83	5.68614e-82	0.050548	0.0192251	0.0157691	0.0356658	0.0152584	0.0177954	0.0348789	0.0331786	0.0616342	0.014635	0.0219489	0.010924	0.0337666	0.050548	0.0444141	0.0183854	0.0269355	0.0240846	0.0412454	0.0366186	0.0303639	0.0293349	0.040959	0.0485463	0.0283061	0.0275051	0.0258405	0.0359436	0.0405146	0.0437594	0.0481043	HGS
548	5.92167e-28	2.6519e-27	0.0177085	0.00516846	0.00056029	0.0113967	0.0120088	0.0116341	0.0064755	0.00960009	0.0158897	0.0124859	0.0134209	0.0124407	0.010846	0.0125447	0.0143981	0.00431544	0.0199717	0.00839274	0.0112959	0.0115566	0.00419084	0.00604914	0.0111969	0.0123975	0.0111091	0.000533918	0.0178714	0.00848339	0.0122646	0.0122747	0.0177085	ZNF579
551	1.22455e-83	1.66338e-82	0.0409086	0.0193078	0.0129051	0.0456198	0.0418633	0.0426434	0.0303878	0.0320897	0.0276229	0.040372	0.0130228	0.0306344	0.0210684	0.0441772	0.0309928	0.0122804	0.0505049	0.0289567	0.0423139	0.0409086	0.0241075	0.0191098	0.0388783	0.0400596	0.0340848	0.0167826	0.0572939	0.0309654	0.0445554	0.0407697	0.049919	PLEKHA6
552	3.97073e-55	3.36035e-54	0.0295575	0.0121864	0.00847026	0.0333952	0.0172909	0.0166684	0.0351818	0.0202125	0.0289997	0.015606	0.0105702	0.0120326	0.0145844	0.0277647	0.0325042	0.00466887	0.034296	0.0203152	0.0291955	0.0284984	0.0182136	0.0206962	0.0246782	0.0250308	0.023216	0.0216935	0.0301982	0.0211948	0.0295575	0.0238313	0.0346789	CABLES1
554	7.56937e-99	1.27441e-97	0.0967265	0.0212905	0.0173705	0.0483886	0.0400214	0.0407655	0.0352285	0.010643	0.0659529	0.0430385	0.0633413	0.0504709	0.0108286	0.065232	0.0535022	0.0269655	0.0706441	0.0235203	0.0645009	0.0510136	0.0325138	0.0229816	0.0323871	0.0469717	0.0387352	0.0134007	0.0642189	0.026794	0.0423945	0.0430935	0.0967265	ACIN1
556	1.26857e-88	1.85545e-87	0.0466109	0.0138365	0.00917451	0.0514633	0.0144944	0.0270223	0.0391405	0.024895	0.0462779	0.0143659	0.025391	0.0222671	0.0276951	0.0454149	0.0266494	0.00907391	0.0283221	0.0125096	0.0302943	0.0466109	0.0216756	0.0303745	0.0294769	0.0345584	0.0224722	0.0296474	0.0212773	0.0181027	0.0426054	0.0332282	0.0437701	SH3RF2
556	2.22631e-74	2.64024e-73	0.0353247	0.0123583	0.00915864	0.0361386	0.0248565	0.0264982	0.0266443	0.030297	0.0487955	0.0168977	0.041836	0.0172886	0.0313932	0.0362433	0.0237968	0.0100437	0.0186217	0.0052304	0.0260834	0.0305361	0.0189818	0.0241194	0.0344158	0.0366564	0.00397943	0.0198831	0.0270347	0.0192331	0.0353247	0.0357414	0.0343018	CEP170B
557	1.49372e-76	1.829e-75	0.0601234	0.0247689	0.0190773	0.0409709	0.0234359	0.027881	0.0428636	0.0448545	0.0214522	0.0325104	0.0416372	0.0264211	0.0382927	0.0449509	0.0634527	0.0207913	0.0376988	0.0252683	0.0495068	0.034799	0.0377367	0.0465101	0.0456756	0.0605062	0.0307554	0.0312826	0.0460198	0.0363981	0.0444986	0.0625936	0.0601234	MPDU1
558	1.13633e-81	1.50099e-80	0.0672009	0.0254176	0.019453	0.0288437	0.0545671	0.0418534	0.0484955	0.0397264	0.0184855	0.0613818	0.0600279	0.0616289	0.0401568	0.0416887	0.0731536	0.018415	0.0237413	0.0193816	0.0557244	0.0313115	0.03371	0.0349083	0.0400061	0.0510389	0.0312245	0.0249423	0.0262167	0.0300822	0.029	0.0466847	0.0672009	TMUB1
558	2.29226e-34	1.22789e-33	0.030727	0.00965387	0.0055577	0.0206192	0.0188819	0.0241988	0.0165753	0.00731783	0.068465	0.012546	0.0347172	0.0260157	0.0108504	0.0270591	0.00870785	0.00591565	0.0110271	0.00437036	0.0211746	0.0149338	0.015215	0.00971	0.0181716	0.0180559	0.00956686	0.0124322	0.0169032	0.0150876	0.0181608	0.017689	0.030727	NAGPA
559	5.18131e-74	6.11223e-73	0.0460312	0.0240297	0.0130126	0.0163401	0.0128071	0.0109727	0.0224335	0.0377859	0.02319	0.0120937	0.00339158	0.00842852	0.038544	0.0369496	0.0254952	0.00524656	0.0526795	0.0330102	0.0312915	0.0236404	0.0344425	0.0422628	0.0359256	0.0460312	0.044838	0.0408268	0.0520805	0.0463421	0.0368528	0.0435114	0.0355224	PPARD
565	1.43112e-84	1.97113e-83	0.0453444	0.0272232	0.0216075	0.0396578	0.0418744	0.0494112	0.036539	0.03745	0.0548937	0.033487	0.0508641	0.0240988	0.0345807	0.0447359	0.0532715	0.0226991	0.0462921	0.0251444	0.0399936	0.0453444	0.033288	0.0400143	0.0420598	0.0450124	0.0385889	0.0261171	0.0452767	0.0332362	0.0432216	0.0449573	0.0537202	SH3GLB2
574	8.32872e-81	1.08267e-79	0.0468616	0.019322	0.0047711	0.0399931	0.0336894	0.0381825	0.0174584	0.0333693	0.0489864	0.0370688	0.0309722	0.0378828	0.0358328	0.0468616	0.0445195	0.00157111	0.0263672	0.0212455	0.0316273	0.0324602	0.0250405	0.037694	0.0269885	0.045259	0.020109	0.0147075	0.0333597	0.0319909	0.0431358	0.0415721	0.0439354	RNF103
580	9.34093e-27	4.04227e-26	0.0143142	0.00806476	0.00504924	0.0120161	0.0099835	0.00903697	0.013638	0.0109367	0.00757259	0.0105862	0.0124675	0.011782	0.010786	0.0107368	0.0173294	0.00105349	0.0134905	0.00917286	0.0134144	0.00977033	0.00901243	0.00965115	0.00914324	0.0120755	0.0111807	0.0103943	0.0118375	0.0092342	0.0114595	0.0123717	0.0143142	C13orf46
581	7.18899e-27	3.11988e-26	0.0138763	0.0105986	0.00696807	0.0103955	0.0198132	0.0169182	0.00987272	0.00579787	0.00628756	0.0163866	0.00601436	0.0117801	0.00343972	0.00999526	0.0136855	0.00129508	0.0150525	0.00769808	0.0143795	0.0084752	0.010123	0.00746069	0.00889487	0.00834044	0.0129373	0.00599784	0.0150603	0.00898094	0.00926252	0.00812904	0.0138763	RAB6B
586	2.7219e-89	4.025e-88	0.0441606	0.0101884	0.00412955	0.0511899	0.0525652	0.0522444	0.041898	0.032051	0.0830485	0.037387	0.0591191	0.041689	0.0274349	0.0513504	0.000184525	0.00307096	0.0293702	0.0124762	0.0230038	0.0441606	0.0171312	0.0232929	0.0366946	0.0402475	0.0167585	0.0143187	0.0205547	0.0177436	0.0408548	0.038778	0.0427638	CMTM4
591	8.05511e-93	1.24667e-91	0.0498402	0.0154935	0.00915757	0.0449756	0.0297314	0.0312118	0.0463228	0.0318858	0.0397736	0.0295752	0.0276194	0.0279485	0.0274858	0.0546237	0.04356	0.0128212	0.0555443	0.0285153	0.0414684	0.0398582	0.0282172	0.0264972	0.0354166	0.0498402	0.035167	0.0249735	0.0438145	0.0276372	0.0225722	0.049557	0.0584966	SPATA13
595	1.23921e-37	7.20536e-37	0.036368	0.00957121	0.00665895	0.0156695	0.0153288	0.0166395	0.036368	0.00583322	0.0110856	0.0138268	0.0047844	0.0114314	0.00431902	0.0154448	0.0611502	0.0019654	0.00593759	0.0045318	0.0263685	0.0137438	0.00924036	0.00118319	0.00858575	0.00754687	0.00478484	0.00911467	0.00306607	0.00627054	0.0100659	0.00656172	0.00993491	SPINK13
597	3.40444e-95	5.44743e-94	0.0762416	0.0153016	0.0131765	0.0209596	0.0184482	0.00242695	0.0170364	0.00322652	0.0635913	0.0185174	0.0331306	0.0179855	0.00748403	0.0646676	0.0498258	0.0174952	0.0524627	0.0267127	0.0531492	0.0434227	0.0221019	0.0126164	0.0243805	0.0403407	0.0200123	0.00552984	0.0409379	0.0263254	0.0155097	0.0377818	0.0762416	NIPBL
605	1.9762e-94	3.12483e-93	0.0670664	0.0183709	0.0122955	0.053766	0.0267244	0.0240349	0.0517367	0.0276798	0.0375552	0.0236635	0.016732	0.0116624	0.0236999	0.0449883	0.0231223	0.0143296	0.0378492	0.027768	0.0383543	0.0441728	0.0216677	0.0247176	0.0327885	0.0360777	0.0301498	0.0332576	0.0209281	0.0234961	0.0490521	0.0368851	0.0670664	PPFIBP2
608	1.07162e-44	7.30933e-44	0.0214575	0.0110659	0.00306027	0.0178063	0.0104197	0.00385403	0.0112312	0.0172922	0.014504	0.0111325	0.00951599	0.00595302	0.0114212	0.0212059	0.0265943	0.0021833	0.0247273	0.0188696	0.0177909	0.0127497	0.0152477	0.016089	0.018848	0.0209038	0.01794	0.0106108	0.0204955	0.0181245	0.0214575	0.0198053	0.0232979	CLIP2
609	2.52083e-87	3.61737e-86	0.0592456	0.0239067	0.0170871	0.0352602	0.0349876	0.0346111	0.0405335	0.0291453	0.0174196	0.0336611	0.00866604	0.0203179	0.0342097	0.0406273	0.0283682	0.0104709	0.0139679	0.013449	0.0383213	0.0312352	0.0304128	0.0226245	0.0388044	0.0352432	0.0210326	0.0274753	0.0147042	0.0299272	0.0353614	0.0359371	0.0592456	TMEM8A
610	4.90683e-61	4.66455e-60	0.0477098	0.0176273	0.00803724	0.030048	0.0165765	0.00542947	0.0121199	0.0128503	0.0121987	0.0154733	0.00597877	0.008568	0.01384	0.0376038	0.0422474	0.00776962	0.0258211	0.0134553	0.0452548	0.029601	0.0229742	0.0229796	0.0275091	0.0345399	0.014183	0.0148814	0.0214912	0.0178885	0.0299271	0.0353321	0.0477098	DCTN1
611	1.29379e-93	2.02289e-92	0.0624893	0.0178805	0.0161548	0.0388007	0.0143798	0.016605	0.0217263	0.0208417	0.0563584	0.0188977	0.015941	0.0189227	0.0240015	0.0420544	0.0250892	0.0186748	0.0257359	0.023681	0.0433399	0.0256121	0.0280536	0.0193062	0.0352999	0.040545	0.0363578	0.00416517	0.0310758	0.0270813	0.0440278	0.0373712	0.0624893	MAFG
622	1.31326e-44	8.93211e-44	0.0395356	0.0157985	0.0143808	0.0342436	0.0284931	0.0179376	0.0213593	0.00573185	0.0252052	0.0183066	0.0164018	0.0129047	0.00401277	0.0230881	0.0159394	0.0164666	0.0195732	0.00485732	0.0207623	0.0208556	0.0151639	0.00883623	0.00533723	0.0142622	0.00442264	0.00796152	0.0149442	0.011063	0.0158481	0.0153989	0.0395356	CSRNP2
628	8.49223e-40	5.18406e-39	0.0236714	0.00960194	0.00600527	0.0184963	0.016952	0.0109723	0.0158439	0.00599853	0.0216986	0.0190641	0.0196471	0.0164986	0.0114893	0.0216564	0.0145644	0.00581114	0.0159884	0.010645	0.0173414	0.0190279	0.0115113	0.0113499	0.0125905	0.0180455	0.00716905	0.00954344	0.0149742	0.0123489	0.0162192	0.0177504	0.0236714	COG7
632	1.48468e-54	1.24359e-53	0.0451019	0.0170961	0.0156839	0.0138863	0.0214089	0.00457916	0.00548523	0.014224	0.018122	0.0233736	0.0290735	0.0236399	0.0239249	0.0285	0.043282	0.0201168	0.0355471	0.0246935	0.0211622	0.0243018	0.0187072	0.0130928	0.0255576	0.0274735	0.0157014	0.00343431	0.0410852	0.0225531	0.00952746	0.0222921	0.0451019	OGT
633	3.30911e-92	5.08154e-91	0.0527254	0.0227455	0.0189079	0.0407292	0.0114089	0.0126452	0.0345018	0.0196862	0.0152628	0.0102387	0.00170143	0.00465936	0.0236185	0.0456521	0.0405542	0.0154914	0.038923	0.0248964	0.0405304	0.0343525	0.0279836	0.0226122	0.028122	0.0350796	0.0282037	0.0253792	0.0355727	0.0263876	0.0348776	0.0325953	0.0527254	KHNYN
633	6.51733e-23	2.53895e-22	0.0116262	0.00367847	0.000315145	0.00568352	0.0124132	0.0117338	0.0109716	0.00822204	0.0196554	0.0133511	0.00905304	0.0117454	0.00975131	0.0099591	0.00637612	0.000587043	0.0124373	0.00741264	0.0121474	0.00478586	0.00985707	0.0152199	0.00104551	0.0127468	0.0106131	0.0102186	0.0159169	0.00846931	0.0106059	0.0107443	0.0116262	C15orf39
643	2.86793e-62	2.77669e-61	0.05401	0.0343867	0.0321916	0.0321224	0.0529516	0.0381518	0.0389074	0.0337014	0.0264922	0.0614731	0.0867098	0.0723948	0.0303469	0.0417065	0.0875751	0.0226937	0.0603322	0.0367463	0.05401	0.0322473	0.0365297	0.0292495	0.0405074	0.0343829	0.0521415	0.0341764	0.0477352	0.0421848	0.0329866	0.0331683	0.0611514	APOL2
644	3.67492e-76	4.47043e-75	0.0595919	0.0187931	0.0139927	0.0628462	0.0359486	0.0310027	0.0471873	0.0218397	0.0301454	0.0311471	0.0292742	0.0240331	0.0218371	0.0536055	0.0443771	0.0121458	0.0211375	0.0114268	0.0534023	0.0450872	0.0266482	0.017841	0.0317296	0.0369238	0.0259017	0.0298284	0.0132215	0.0247458	0.0436029	0.0362291	0.0595919	TLCD2
646	2.4336e-43	1.60571e-42	0.0309271	0.0272809	0.0280282	0.019041	0.00439762	0.0111144	0.0170099	0.029572	0.00472914	0.00539974	0.00291824	0.00606567	0.0306659	0.021469	0.0345121	0.0193879	0.0167972	0.025552	0.0256651	0.025289	0.0271583	0.0318534	0.0221422	0.0291644	0.0305436	0.0264718	0.0171309	0.0308624	0.025543	0.0309271	0.0249878	LINC00520
646	5.08038e-74	5.99528e-73	0.0467001	0.0151857	0.0120771	0.0388885	0.0254097	0.0175369	0.0359102	0.0010128	0.0203337	0.029706	0.0268672	0.0269466	0.0245134	0.0467001	0.040575	0.0197622	0.0389073	0.0146578	0.0486137	0.0349036	0.0250214	0.0237186	0.036747	0.0382742	0.0300941	0.0263717	0.0147831	0.029359	0.0364131	0.0360525	0.0535695	TRIM25
648	1.27464e-26	5.49826e-26	0.0157631	0.00960392	0.00623421	0.00858334	0.0119712	0.0122077	0.00891657	0.00683317	0.0217577	0.0110981	0.01124	0.00530715	0.0110434	0.00990064	0.0164996	0.00477887	0.0186874	0.010443	0.0135052	0.000457488	0.0116038	0.00772259	0.010391	0.012828	0.0123764	0.00644809	0.016881	0.0108938	0.0102779	0.0130101	0.0157631	SH3TC1
652	2.1097e-90	3.18001e-89	0.099096	0.0175813	0.0132548	0.0657499	0.0268914	0.0392571	0.0424335	0.0112653	0.0755976	0.0273267	0.0238092	0.0122698	0.0212069	0.0749173	0.0615493	0.0257393	0.0732342	0.0378487	0.0611758	0.0513205	0.0276299	0.0158032	0.036635	0.0543575	0.028501	0.0032657	0.0466755	0.0405836	0.0424074	0.0487956	0.099096	KMT2C
652	2.33409e-70	2.59294e-69	0.0360823	0.0143744	0.00928289	0.03717	0.0188432	0.0194329	0.0272828	0.0253329	0.0339146	0.0176677	0.00807689	0.011423	0.0232784	0.0364455	0.0346197	0.00787922	0.0375371	0.0199045	0.0378579	0.0360823	0.0177484	0.0258612	0.033339	0.0332713	0.0215386	0.0221723	0.0281326	0.0201904	0.0327836	0.0336994	0.0459543	ZFPM1
653	2.50427e-83	3.38389e-82	0.0727178	0.0276556	0.0124617	0.0239568	0.0557512	0.0440371	0.0243026	0.0299108	0.0323236	0.0563233	0.0488598	0.049983	0.0320364	0.0577854	0.0350668	0.00943106	0.0369003	0.0275623	0.0552744	0.0374028	0.0414886	0.0413013	0.0341783	0.0727178	0.027731	0.0172899	0.0236667	0.0515659	0.0363233	0.0724355	0.0577342	IST1
656	4.9041e-90	7.35243e-89	0.0569226	0.0237922	0.0205328	0.0472496	0.029137	0.0205709	0.0275204	0.0244016	0.0366215	0.0351894	0.0391885	0.0355711	0.0274505	0.0374297	0.0465928	0.0201719	0.0126422	0.0109519	0.0360014	0.0421309	0.0304684	0.0221539	0.0376978	0.038501	0.0264932	0.0220557	0.011411	0.0254936	0.0350088	0.0385321	0.0569226	CC2D1A
659	6.74257e-54	5.55881e-53	0.0262815	0.0155966	0.00786664	0.0141731	0.0127654	0.0102657	0.00369637	0.0133109	0.0108698	0.0147872	0.00514426	0.00724125	0.0216791	0.0183881	0.0218786	0.00264419	0.0204098	0.0092831	0.0207228	0.0167913	0.0233989	0.0240313	0.0262815	0.018058	0.02197	0.0168273	0.0215653	0.0196925	0.0152721	0.0186889	0.0273734	TNK2
664	3.84718e-81	5.03029e-80	0.0343765	0.00997336	0.00949716	0.0357286	0.0191233	0.0142211	0.0203325	0.0127829	0.00487577	0.0231646	0.0235747	0.0250438	0.0257862	0.036092	0.0117186	0.00788244	0.0187036	0.0146343	0.0254711	0.0343765	0.0178503	0.0174972	0.0278539	0.029409	0.0147853	0.0049986	0.0247291	0.0136967	0.0307537	0.0278346	0.0343428	MET
675	5.155e-89	7.59282e-88	0.0664149	0.023047	0.0168864	0.026609	0.0315406	0.0171376	0.0397797	0.00960232	0.0233581	0.0452191	0.0428879	0.0399974	0.00624692	0.0475617	0.0521019	0.0146583	0.0332173	0.0269612	0.0416631	0.0332604	0.0313086	0.0415919	0.03389	0.0493537	0.0268863	0.0296318	0.0458708	0.027074	0.0178365	0.0487177	0.0664149	CTDSP1
677	7.4835e-37	4.25176e-36	0.021791	0.00821793	0.00523267	0.0111026	0.0118849	0.0141526	0.0138469	0.00195727	0.0191033	0.0136755	0.00869972	0.014677	0.00561773	0.0183693	0.0229325	0.00455505	0.00559534	0.00717208	0.0182302	0.0161208	0.0108953	0.0103864	0.0136784	0.017352	0.0133275	0.00863301	0.0151726	0.0109165	0.000854709	0.0165662	0.021791	BCL9L
678	6.98081e-89	1.02595e-87	0.0636306	0.0101445	0.0085691	0.0147991	0.0104528	0.0150494	0.0238023	0.00144516	0.0454981	0.0172861	0.0195356	0.0199282	0.00935215	0.0492211	0.0449629	0.0120003	0.0433731	0.0123964	0.0401455	0.0344773	0.018131	0.00742757	0.0202449	0.0304498	0.0182033	0.00586437	0.0196774	0.0114878	0.0151072	0.03181	0.0636306	SETD2
688	1.23437e-37	7.17846e-37	0.0209527	0.0143112	0.0143585	0.0259315	0.0180541	0.0190983	0.0259982	0.0122543	0.0105317	0.0137214	0.00560588	0.00748241	0.0122573	0.0234121	0.0164522	0.0148173	0.0138238	0.0113634	0.0257943	0.0174247	0.0146042	0.00939734	0.0124069	0.0179188	0.0107815	0.00953083	0.013696	0.0124128	0.0209527	0.0186697	0.018749	ZDHHC11B
690	1.00145e-41	6.39988e-41	0.0216836	0.0147691	0.0120596	0.0108926	0.00342376	0.00631873	0.00914159	0.0173429	0.0112782	0.00650736	0.00359184	0.00527023	0.0180655	0.0166822	0.0150513	0.00591468	0.00850571	0.0116132	0.0167582	0.0182825	0.0185238	0.0213228	0.0161112	0.0216836	0.00925122	0.014307	0.0126709	0.016264	0.0160765	0.0200345	0.0196594	GPATCH1
697	7.29716e-58	6.52793e-57	0.044361	0.0053862	0.00536841	0.0435388	0.0341131	0.0358046	0.0340817	0.0230005	0.0550761	0.0374266	0.0487392	0.0402368	0.0230157	0.0420189	0.0306569	0.00330106	0.0408127	0.0235722	0.0402673	0.0342374	0.0164104	0.0290346	0.0307504	0.0370809	0.0297725	0.0335791	0.0377226	0.0176061	0.0358683	0.0369636	0.044361	ZDHHC7
698	9.73269e-77	1.1961e-75	0.0507905	0.0196965	0.0102374	0.0535661	0.0303479	0.0273846	0.0384872	0.0303632	0.048918	0.034586	0.0386886	0.0364357	0.0235261	0.054627	0.015156	0.0111515	0.0334125	0.0184955	0.0419716	0.0507905	0.0285599	0.00162969	0.0328414	0.0388933	0.0215275	0.0242349	0.0224884	0.0219235	0.045724	0.0376012	0.058729	NAPEPLD
703	5.4643e-54	4.5194e-53	0.0357814	0.0165269	0.0131237	0.0254121	0.0197244	0.0129894	0.0290194	0.00835489	0.0166499	0.0204918	0.0140847	0.0161991	0.0192461	0.0274844	0.0377007	0.0112537	0.0275695	0.0209871	0.034442	0.0224616	0.0229843	0.0199929	0.0225648	0.0258011	0.027566	0.0177503	0.0270655	0.0231616	0.0264018	0.0254996	0.0357814	TMEM94
705	8.13503e-33	4.1807e-32	0.0215836	0.00756246	0.00724256	0.0227641	0.00274176	0.00946074	0.0157943	0.00524524	0.0291163	0.00199693	0.00119533	0.00215893	0.00447019	0.0177966	0.0111469	0.00804261	0.0134186	0.00642689	0.0167426	0.0215836	0.0114906	0.00357687	0.0106142	0.00943452	0.00872348	0.00959683	0.0122697	0.007525	0.0175883	0.00972191	0.0226953	AC108062.1
717	2.06751e-71	2.33233e-70	0.053872	0.0369792	0.0273084	0.0409833	0.0612718	0.0680038	0.0540238	0.034756	0.0771786	0.0582258	0.0209325	0.0379236	0.0353274	0.0641023	0.0583666	0.027203	0.046221	0.0292437	0.0563743	0.0540567	0.0419129	0.0327066	0.0425048	0.055246	0.0398804	0.0415764	0.0516025	0.0380438	0.0327562	0.053872	0.0479465	ASCC2
719	7.41753e-75	8.853e-74	0.0423581	0.0317416	0.0201564	0.0437319	0.0491797	0.0448642	0.040293	0.0381595	0.0416341	0.0476999	0.0526741	0.0464705	0.0339851	0.0383031	0.0540929	0.0155872	0.0485143	0.0319346	0.0513241	0.0423581	0.0350844	0.0354554	0.0397792	0.045933	0.0124978	0.0330633	0.0430804	0.0377434	0.0417197	0.0445928	0.0524631	ARFGAP1
722	1.82982e-63	1.81028e-62	0.0633707	0.0126861	0.0103184	0.0423625	0.0218087	0.0251355	0.010735	0.0269044	0.0223515	0.0243381	0.00366339	0.00706991	0.0186523	0.0363701	0.0327633	0.0112944	0.0455944	0.0132133	0.0323446	0.044675	0.0198286	0.00652825	0.0374875	0.0275239	0.019828	0.003652	0.0396486	0.00890436	0.041137	0.0255977	0.0633707	MACC1
727	3.73748e-77	4.6322e-76	0.0493317	0.0169784	0.00985072	0.0383018	0.0516641	0.0534223	0.0254051	0.0384879	0.0260352	0.0546863	0.0471288	0.0405967	0.0370893	0.0515826	0.0323608	0.0221787	0.0371338	0.0107823	0.0550462	0.0302528	0.0298336	0.0269187	0.0499211	0.0493317	0.0214475	0.00533138	0.000252553	0.0165083	0.0431028	0.0480194	0.0729191	RABL6
727	4.60507e-60	4.2973e-59	0.0445956	0.0218397	0.0147561	0.0170416	0.0137606	0.0163864	0.0188868	0.0258715	0.00412793	0.0153029	0.0110548	0.0142723	0.036208	0.0328136	0.0183906	0.0172489	0.0147354	0.0185088	0.0284157	0.0162059	0.0312809	0.0529912	0.00994058	0.0394323	0.0203133	0.0284738	0.0117234	0.0239814	0.0170944	0.0445956	0.0340319	NFKBIB
728	1.38689e-67	1.47381e-66	0.115324	0.0210128	0.000106117	0.0547562	0.0312202	0.0532025	0.0682189	0.0647554	0.0229897	0.0281216	0.0374093	0.0276125	0.0663985	0.115324	0.0680642	0.0222569	0.0218328	0.0169886	0.0811804	0.0490608	0.0188596	0.0444609	0.0681038	0.0990528	0.0214793	0.0487157	0.0203371	0.0626532	0.0592759	0.0979955	0.0844051	MT-ATP8
729	4.70037e-81	6.13628e-80	0.0774233	0.0243959	0.0187424	0.0526318	0.0286204	0.0267743	0.0215637	0.0237398	0.0585461	0.0311495	0.0268882	0.0186758	0.026313	0.0695294	0.0283811	0.0212156	0.0491893	0.0343166	0.0613327	0.0627022	0.031641	0.00759359	0.0395369	0.0515705	0.0290685	0.000678416	0.0282856	0.0403585	0.0504557	0.0478835	0.0774233	ZMYND8
732	3.24499e-38	1.913e-37	0.0300863	0.00562767	0.00421906	0.0220624	0.0131027	0.013607	0.0149323	0.00834193	0.0328957	0.0146817	0.0235998	0.0164418	0.00262285	0.0236109	0.0213737	0.00626122	0.0243572	0.00824403	0.0247522	0.00887255	0.010852	0.0047181	0.011374	0.0151155	0.0183457	0.0113838	0.0297143	0.0119568	0.0170296	0.0140145	0.0300863	JAK2
733	3.86037e-26	1.64238e-25	0.0229822	0.0155934	0.0135772	0.0136194	0.0203513	0.018777	0.0198728	0.0083361	0.0240857	0.0154292	0.00647996	0.00869583	0.00897755	0.0168682	0.0133481	0.0138219	0.0187474	0.00232328	0.0176039	0.0229822	0.0166197	0.0086727	0.0128608	0.00671203	0.00129893	0.00967669	0.00332355	0.0103956	0.0133231	0.0064576	0.0298743	AL021453.1
736	1.78295e-69	1.95669e-68	0.0602948	0.0175902	0.0142951	0.0390512	0.0496226	0.0490329	0.0310743	0.00193799	0.0794918	0.0516491	0.0686851	0.0562527	0.0107158	0.0468409	0.0548411	0.0165512	0.0420799	0.0266354	0.0438339	0.046808	0.0236136	0.00702259	0.0248639	0.0357985	0.0133241	0.00498803	0.0358036	0.0254241	0.0271046	0.0351752	0.0602948	SETD5
740	2.46858e-64	2.48548e-63	0.05639	0.0237385	0.0196194	0.0499302	0.0244853	0.0306738	0.0352111	0.0259573	0.0492506	0.0269725	0.0300809	0.0249597	0.0288445	0.0450472	0.0434476	0.0212399	0.0479498	0.0175183	0.0416047	0.040453	0.0306405	0.0234191	0.0353998	0.0386671	0.0272402	0.0174117	0.0329812	0.0327308	0.0414731	0.0358912	0.05639	MROH1
744	4.41929e-69	4.81371e-68	0.0395528	0.0210709	0.0156687	0.0228041	0.0177771	0.0151911	0.014732	0.00533595	0.00455249	0.016194	0.00896465	0.00787909	0.0312695	0.0340642	0.0354361	0.00151852	0.033186	0.0127946	0.0354755	0.0176641	0.0268447	0.0163843	0.0262929	0.0395528	0.0163147	0.00458864	0.0274549	0.0220508	0.0218497	0.0399195	0.0329809	FURIN
754	4.93461e-84	6.74122e-83	0.0670664	0.019111	0.0163638	0.00695721	0.0372435	0.0309089	0.0292906	0.0375626	0.0389826	0.043577	0.0460569	0.0445456	0.0438582	0.0561483	0.0464255	0.00871877	0.00382106	0.0180086	0.0472785	0.0198266	0.0357774	0.0430746	0.037708	0.0564038	0.0182767	0.0352795	0.0253164	0.0399756	0.0197501	0.0533871	0.0670664	JOSD1
758	1.51835e-65	1.56492e-64	0.0312743	0.0125373	0.00903403	0.0221274	0.0107029	0.00797885	0.0179893	0.0243536	0.0175408	0.0144174	0.0140513	0.0134441	0.0288429	0.0312743	0.0134217	0.0128088	0.016066	0.0165145	0.0257628	0.0224671	0.0220855	0.0252789	0.0272536	0.032863	0.0241585	0.0172758	0.00856146	0.0236143	0.0302362	0.0347748	0.0345646	DOT1L
759	3.90032e-77	4.83225e-76	0.0429649	0.0281911	0.0230477	0.024803	0.0356373	0.0295277	0.0233177	0.0393775	0.0261372	0.0419173	0.0493827	0.0470189	0.033217	0.0386083	0.0272569	0.0115708	0.0322799	0.0265725	0.0326129	0.0348237	0.0330828	0.0389598	0.0397272	0.0448381	0.0195534	0.0180737	0.0107476	0.0379404	0.0320724	0.0467243	0.0429649	MED16
764	1.13743e-83	1.54693e-82	0.0608398	0.0170398	0.0128473	0.0277198	0.0113532	0.00511501	0.0294363	0.00471842	0.0403512	0.014257	0.0107119	0.0119073	0.0105142	0.034686	0.0346938	0.0109398	0.0250528	0.0134867	0.0412303	0.0352849	0.0238112	0.0124923	0.0182048	0.0240126	0.0202642	0.0217366	0.0218574	0.0182358	0.0319304	0.0227108	0.0608398	TBC1D22A
768	5.57396e-74	6.57081e-73	0.0508485	0.0203675	0.017744	0.0339354	0.0176918	0.0272155	0.0278083	0.0187096	0.0427949	0.0163613	0.0314501	0.0218938	0.0207598	0.0363037	0.0326171	0.0181167	0.0238751	0.00866534	0.0346816	0.037045	0.0254381	0.0155217	0.0245584	0.0250995	0.00149847	0.014549	0.00181033	0.0229405	0.0293275	0.0227507	0.0508485	DHDDS
778	2.04271e-75	2.4599e-74	0.0449065	0.0239672	0.0204329	0.0296994	0.0299965	0.0230604	0.0193642	0.00990331	0.0125406	0.0313996	0.0259189	0.023203	0.00537787	0.0379262	0.0360132	0.0173235	0.0329222	0.0225068	0.0357825	0.0336992	0.0287145	0.0290396	0.033561	0.0449065	0.0137806	0.00567649	0.0345559	0.0280829	0.0331771	0.0430457	0.046792	DAPK3
781	3.71558e-51	2.90812e-50	0.0363959	0.0153576	0.0125287	0.036125	0.010736	0.016877	0.0189052	0.015304	0.0522651	0.00519977	0.0175286	0.00954447	0.0181861	0.0248394	0.0197631	0.015465	0.0138552	0.00858361	0.00750216	0.0300543	0.0163172	0.0154339	0.0118802	0.0189369	0.00617702	0.00820774	0.00486042	0.0146543	0.0279975	0.0176898	0.0363959	CDK5RAP3
807	4.84383e-50	3.70219e-49	0.0385078	0.00658099	0.00559439	0.0144103	0.00639997	0.0155091	0.015675	0.0222413	0.00284655	0.0177346	0.0153231	0.0158632	0.0275145	0.0377683	0.0212593	0.0112798	0.0400024	0.0209756	0.0226319	0.0235709	0.0140775	0.0168496	0.030124	0.0362846	0.0160909	0.00436896	0.0400044	0.0204036	0.010838	0.0385078	0.0354504	PSME4
812	2.18116e-81	2.86196e-80	0.0574171	0.0101647	0.00843295	0.0344888	0.024481	0.03079	0.0261301	0.0077673	0.0595486	0.0243029	0.0327811	0.0236672	0.0111515	0.0439156	0.0261041	0.00949316	0.0322656	0.0080146	0.0439405	0.0381155	0.0187749	0.00497564	0.0231857	0.029793	0.0141816	0.0096874	0.00980089	0.0139718	0.0235524	0.0290577	0.0574171	ARFGEF1
819	6.99612e-65	7.12097e-64	0.0385831	0.0189769	0.0125248	0.0288514	0.011714	0.00635805	0.022466	0.0191884	0.024853	0.0189849	0.0218596	0.00651892	0.0249497	0.0411175	0.0307025	0.0140054	0.0239999	0.0179599	0.0307089	0.0338202	0.025478	0.0226528	0.0348841	0.0385831	0.0253723	0.0209864	0.0174333	0.02897	0.0226024	0.0349545	0.0462555	MED15
821	6.55938e-66	6.79816e-65	0.028004	0.0101238	0.0107359	0.0297312	0.0212837	0.0114243	0.0248867	0.0219595	0.00245732	0.023396	0.0126064	0.0165962	0.0202639	0.0263018	0.0250641	0.0142057	0.0284657	0.0134858	0.0232868	0.028004	0.0151015	0.0158335	0.0231429	0.0256382	0.0141065	0.012234	0.017417	0.0120253	0.0287023	0.0242962	0.0297798	FAAH
823	1.14607e-65	1.18413e-64	0.0312266	0.0150055	0.0126174	0.03252	0.0165615	0.00553604	0.0198258	0.0206919	0.011199	0.0178199	0.0149493	0.0111274	0.0207575	0.0268537	0.0225165	0.0166809	0.02007	0.00744992	0.0226411	0.0312266	0.0165531	0.0107786	0.0234084	0.0218	0.0112402	0.0147252	0.0150054	0.016837	0.0284055	0.018911	0.0342487	CNKSR1
835	8.18074e-14	2.43405e-13	0.00826059	0.00577616	0.00557684	0.013024	0.0120389	0.015359	0.00513381	0.00815073	0.0214093	0.0116308	0.0173042	0.0132688	0.00790441	0.00892041	0.00883253	0.00643654	0.00943373	0.00883132	0.00779424	0.00546654	0.0055204	0.00367665	0.00891828	0.00768658	0.00877705	0.00517059	0.00674697	0.00870593	0.00826059	0.00767163	0.01116	VNN3
837	1.17811e-64	1.19082e-63	0.0462723	0.0155971	0.0119667	0.0403715	0.00749568	0.00724859	0.021519	0.0115321	0.0237902	0.0084979	0.00660683	0.00609299	0.0105896	0.0368361	0.0277824	0.0159124	0.0295777	0.0180452	0.0279614	0.0344627	0.0171745	0.0116341	0.0182718	0.0235967	0.0176671	0.0113272	0.0242433	0.0209444	0.028309	0.0228565	0.0462723	UVSSA
838	1.16252e-64	1.17542e-63	0.0280187	0.00847702	0.00378765	0.0304083	0.0222953	0.0209381	0.0191846	0.022108	0.0481873	0.0147817	0.0128865	0.00818635	0.0217591	0.0284956	0.0209468	0.00327743	0.0153306	0.0084708	0.0208485	0.0280187	0.012894	0.0143924	0.0253652	0.0239939	0.00681308	0.00901804	0.00942296	0.0139624	0.0262436	0.0250166	0.0329664	CAMSAP3
845	6.3748e-47	4.56638e-46	0.0576236	0.0175658	0.0148258	0.0335024	0.0214689	0.00222442	0.0263395	0.00377238	0.0566696	0.0243013	0.0325156	0.0308635	0.00110897	0.0383812	0.0367478	0.0176914	0.0336093	0.0127733	0.0412023	0.0402335	0.0219142	0.0048363	0.0148933	0.0176758	0.0211235	0.0134186	0.0285707	0.0212872	0.0212032	0.0171928	0.0576236	UBR2
853	6.80299e-29	3.13922e-28	0.0105517	0.00879158	0.00753645	0.00792467	0.00170925	0.00634143	0.00467006	0.0130451	0.000335016	0.00282439	0.000514597	0.000634479	0.0146687	0.00899797	0.00683787	0.00785452	0.00817611	0.0110528	0.00709216	0.0102684	0.0100628	0.0163593	0.0109208	0.0127397	0.00998095	0.0116427	0.00710602	0.011403	0.0105517	0.012797	0.00811291	LINC01660
857	2.81462e-52	2.24915e-51	0.0289414	0.0262123	0.0195326	0.0215658	0.0450224	0.0375572	0.0272022	0.0294912	0.0359311	0.0452791	0.0473008	0.0480086	0.0283696	0.0289414	0.024303	0.0167176	0.00877404	0.00276406	0.0335379	0.0231649	0.0296238	0.0291439	0.0296053	0.029132	0.024144	0.0249226	0.00450111	0.0255223	0.0220762	0.0289323	0.0350435	PITPNM1
864	4.38202e-23	1.71467e-22	0.00952542	0.00702426	0.00529917	0.00252445	0.00965963	0.00795558	0.00483098	0.00985626	0.00783418	0.0117383	0.0178079	0.0148086	0.0105313	0.00589517	0.00500115	0.00625133	0.0123241	0.00631497	0.00794551	0.00578262	0.00856616	0.0118029	0.00952542	0.00852883	0.00487872	0.00776147	7.81252e-05	0.00848102	0.00755512	0.00787254	0.00892619	AL021707.6
868	1.30127e-46	9.2619e-46	0.0231931	0.0170987	0.0106398	0.0176399	0.0071592	0.0088322	0.014532	0.020259	0.00591442	0.00652412	0.00220826	0.00486224	0.019487	0.018058	0.0146149	0.0059198	0.0126334	0.0151134	0.0147848	0.0175457	0.0208795	0.0259076	0.0182941	0.0231931	0.0143997	0.0193812	0.0118336	0.0173169	0.0195143	0.0224973	0.0170029	ADAMTS15
871	1.87328e-41	1.18944e-40	0.0195476	0.0128761	0.00952274	0.0199102	0.0124454	0.0125831	0.014792	0.011419	0.0212827	0.0116527	0.008712	0.0118048	0.0101834	0.015568	0.0159304	0.00861702	0.00726933	0.00808705	0.0121302	0.0195476	0.0153323	0.0123336	0.0122126	0.0123196	0.00792941	0.0115766	0.00422878	0.00929809	0.0160352	0.0127185	0.0177501	SYT16
880	3.77951e-42	2.43342e-41	0.0280141	0.00145191	0.0022543	0.0216187	0.0158909	0.0115682	0.00411893	0.00813227	0.0484729	0.0141403	0.0385161	0.0218555	0.00947822	0.0280141	0.0190915	0.00438174	0.0254986	0.00992103	0.0212235	0.0183888	0.00685708	0.00102652	0.0164372	0.0173075	0.0125417	0.00464776	0.0276686	0.00946271	0.018477	0.0172792	0.0275323	C2CD5
893	1.14349e-66	1.19995e-65	0.0579396	0.00621517	0.000338387	0.0274588	0.0188257	0.0209412	0.0384813	0.0300706	0.0252838	0.0233195	0.0221607	0.0193855	0.0250084	0.0530946	0.0436303	0.000831714	0.0388086	0.016654	0.0494729	0.046937	0.0240067	0.017807	0.0363902	0.0444956	0.0108998	0.0206338	0.0376328	0.0281557	0.0444049	0.0470108	0.0579396	TMEM131
893	7.0471e-20	2.52291e-19	0.0154504	0.00444169	0.00497986	0.0177303	0.00277304	0.00340084	0.00979838	0.00175824	0.0237651	0.00308397	0.00488494	0.00436997	0.0016914	0.0139274	0.00526588	0.0046696	0.0103791	0.00333337	0.00834018	0.0154504	0.0063693	0.000916035	0.00435821	0.00487891	0.00667851	0.00537345	0.0103063	0.00459999	0.0115443	0.00487279	0.0164583	LINC01336
894	9.56484e-67	1.00591e-65	0.0377794	0.0205404	0.0137791	0.0284351	0.0154147	0.00801011	0.0267705	0.0270481	0.0140238	0.0129801	0.0199173	0.016055	0.0199563	0.0312121	0.0307124	0.0156801	0.0176247	0.0158653	0.0301788	0.0267758	0.0274876	0.0267896	0.0311055	0.0377794	0.008928	0.0202024	0.00137382	0.0223661	0.0307273	0.0368772	0.0344133	SCAP
896	5.92126e-75	7.07219e-74	0.055242	0.0143147	0.00702878	0.0375943	0.0285873	0.0231628	0.043142	0.0171147	0.0158217	0.0263668	0.0224874	0.0104586	0.0248693	0.0468488	0.0460396	0.00582248	0.0451869	0.027634	0.0449196	0.0284327	0.0239433	0.0230919	0.0312006	0.0388148	0.03401	0.026375	0.0359508	0.027531	0.0369736	0.0382786	0.055242	LARP4B
898	9.54476e-59	8.68218e-58	0.0306395	0.0109403	0.00510204	0.0194228	0.0202517	0.0165026	0.0154464	0.00771049	0.0213762	0.0247785	0.0363483	0.0357644	0.0189071	0.0306395	0.0206958	0.0057524	0.0183729	0.0155146	0.0257642	0.0239542	0.0179777	0.0248774	0.0206397	0.0311386	0.0157566	0.00549679	0.0122685	0.0177934	0.0192085	0.0307662	0.033194	BIN3
898	4.46457e-66	4.64432e-65	0.0419953	0.0113669	0.00770462	0.0243218	0.0135677	0.017327	0.0271931	0.0144764	0.0168213	0.0104321	0.0236867	0.00909959	0.0179688	0.0325761	0.034772	0.00800182	0.0192964	0.00571117	0.0259515	0.0234291	0.0193147	0.0118494	0.016168	0.0245522	0.00862102	0.0160278	0.000629116	0.0106794	0.0196114	0.0244117	0.0419953	NADSYN1
903	1.34282e-75	1.62174e-74	0.0401097	0.00916085	0.00558487	0.0205241	0.00138361	0.00283272	0.0209645	0.0104105	0.0150409	0.00406624	0.000325899	0.00177509	0.0103646	0.0358645	0.0365781	0.00216683	0.0352701	0.00863589	0.024918	0.0223571	0.0177661	0.0119138	0.0240832	0.0264039	0.0177345	0.0121013	0.0283736	0.0160248	0.0151976	0.0244015	0.0401097	UBE4A
909	3.06798e-76	3.73616e-75	0.0654151	0.0146059	0.0143531	0.023823	0.0109729	0.0139693	0.0237784	0.00943425	0.0392404	0.0139866	0.0085743	0.00567437	0.0171943	0.0340136	0.0239789	0.0202058	0.06148	0.0180767	0.0324648	0.0364288	0.0222438	0.0116625	0.0107089	0.0180515	0.0241859	0.0101761	0.049719	0.023254	0.0213847	0.0181646	0.0654151	AKAP17A
917	2.45285e-35	1.34286e-34	0.0224921	0.00946797	0.00880488	0.0166254	0.0110463	0.0140343	0.0145074	0.000351851	0.0262599	0.0113684	0.0130487	0.0114594	0.00665185	0.0142268	0.0143709	0.00777662	0.0117581	0.0093124	0.0213255	0.0141718	0.0107103	0.00393993	0.0125602	0.00935702	0.0154186	0.0123782	0.00401953	0.0117852	0.0143342	0.00907232	0.0224921	PTPRR
920	5.61913e-21	2.07709e-20	0.00902705	0.00908097	0.00927902	0.00808898	0.00340596	0.00509743	0.00981297	0.00625695	0.0140784	0.0033182	0.00497542	0.00344006	0.00399148	0.00697152	0.00939474	0.00730727	0.0133925	0.00778221	0.0134756	0.00902705	0.00945705	0.0102207	0.00676247	0.00980566	0.0094172	0.00904354	0.0111833	0.0078076	0.00873766	0.01015	0.0104396	GRIP2
926	1.90693e-17	6.35604e-17	0.0167096	0.00377533	0.00257635	0.0122324	0.00895688	0.0103259	0.00505267	0.00421016	0.00915573	0.0105206	0.00753824	0.0112407	0.00553031	0.014986	0.010672	0.00604104	0.0100895	0.00237232	0.00606469	0.0124654	0.0075728	0.00640133	0.0080327	0.0107878	0.00263176	0.00621539	0.00967792	0.00410335	0.00672668	0.0105025	0.0167096	TTC13
937	4.75494e-33	2.45756e-32	0.0281484	0.00964592	0.00976773	0.0285646	0.00700687	0.00845308	0.0191275	0.00653096	0.0201826	0.00604842	0.00637713	0.0047953	0.00606261	0.0210713	0.0218214	0.010031	0.0163148	0.0060995	0.0155152	0.0242854	0.0127579	0.0028818	0.0090709	0.0109064	0.0109916	0.00940687	0.0162294	0.00775775	0.0198114	0.0114466	0.0281484	SLC10A5
942	6.24641e-75	7.45789e-74	0.0516877	0.0100279	0.00368193	0.0192781	0.0237241	0.0252271	0.0249639	0.0118358	0.0249549	0.0315343	0.0380312	0.0270178	0.0156265	0.0474134	0.0428674	0.00157595	0.0352047	0.0137626	0.0389222	0.0305323	0.0226581	0.0186848	0.0153451	0.0410417	0.0268056	0.0143831	0.022623	0.025843	0.0225707	0.0395086	0.0516877	WIPF2
946	9.14007e-69	9.90115e-68	0.0436764	0.0168168	0.0145211	0.0318465	0.0102469	0.021229	0.014323	0.00876944	0.0385296	0.0247334	0.0386458	0.0239608	0.0123584	0.0337946	0.0336372	0.0129421	0.0132432	0.00964478	0.0268891	0.0243743	0.0207623	0.0144271	0.0189558	0.0255655	0.0134149	0.00288706	0.00659687	0.0178964	0.019355	0.0256481	0.0436764	ATG4B
946	8.50398e-24	3.39208e-23	0.0168607	0.0106236	0.00809577	0.000293647	0.00994749	0.00948938	0.0174924	0.0148272	0.00328753	0.013391	0.00883038	0.010054	0.0158415	0.0157156	0.0279478	0.00221571	0.016233	0.0113055	0.0182468	0.00403683	0.0134384	0.0137727	0.0123667	0.0174701	0.0151849	0.0150767	0.014559	0.0150949	0.00699786	0.0168607	0.0162558	GMIP
947	5.53606e-70	6.12161e-69	0.0591075	0.0209605	0.0191608	0.0223999	0.0196393	0.016889	0.0237448	0.0230685	0.0432911	0.0252672	0.0352886	0.0300721	0.0188689	0.0531219	0.0346554	0.0189035	0.0130781	0.0170419	0.0356722	0.0429194	0.0284615	0.0180938	0.0322176	0.0392303	0.0266711	0.0172326	0.0165956	0.0314705	0.0244254	0.0385786	0.0591075	HERC4
949	1.27396e-60	1.20253e-59	0.0514221	0.0101474	0.0111611	0.0114681	0.0208528	0.0239358	0.0141727	0.00816842	0.064158	0.0276928	0.0388012	0.0246904	0.0136122	0.03629	0.0270061	0.0202967	0.0395629	0.0110194	0.0323907	0.0282636	0.01693	0.0136407	0.0114723	0.0245944	0.0222749	0.00587334	0.0367576	0.014503	0.0154471	0.0254476	0.0514221	ANKLE2
956	1.38309e-22	5.34771e-22	0.0142199	0.00716968	0.00659523	0.00400404	0.00370903	0.00537791	0.00784728	0.00567272	0.00311935	0.00536493	0.00732484	0.00470592	0.00508171	0.0100498	0.0145439	0.00590024	0.00971883	0.00668581	0.014678	0.00714043	0.00720829	0.00583002	0.00686043	0.0082912	0.00637208	0.00801076	0.0119472	0.00719634	0.00261662	0.00809807	0.0142199	FCHSD1
958	1.25214e-49	9.48809e-49	0.0293168	0.0126017	0.00917069	0.0175147	0.0160814	0.00800162	0.0167994	0.0094097	0.00773365	0.0187857	0.0255094	0.0207638	0.0115409	0.0224014	0.0231491	0.00850526	0.0176481	0.00634077	0.0204871	0.0189382	0.0149192	0.010642	0.015977	0.0177483	0.0104382	0.0150214	0.0164395	0.0151411	0.0187995	0.0179887	0.0293168	TEP1
965	1.36426e-67	1.45022e-66	0.0478482	0.00709535	0.00535063	0.019944	0.011792	0.0101748	0.0161447	0.0032833	0.0267262	0.0160992	0.0261017	0.0134521	0.00961629	0.0296934	0.0195522	0.00668232	0.0328546	0.00879423	0.0322436	0.024158	0.0128793	0.00134203	0.0146884	0.0193884	0.018464	0.00572065	0.0325705	0.0127223	0.0216533	0.0178324	0.0478482	PRR14L
971	4.67983e-38	2.74969e-37	0.0167526	0.0187266	0.0163873	0.00981408	0.0188735	0.0176742	0.015575	0.0153086	0.0311083	0.0155133	0.0139555	0.0132786	0.0181116	0.011416	0.00565581	0.0118318	0.00464402	0.00528451	0.0174924	0.0120025	0.0177765	0.019542	0.0163235	0.0173859	0.00414785	0.0165179	0.00512566	0.00895556	0.0167526	0.0175707	0.0114681	LINC01644
990	3.91726e-52	3.12505e-51	0.0391951	0.0108339	0.00724256	0.0237566	0.00351354	0.00828311	0.0148666	0.00854533	0.00734615	0.00980204	0.00386617	0.000347519	0.00995766	0.0358639	0.0296558	0.00602807	0.0257084	0.00896578	0.0193393	0.022147	0.0163666	0.00943656	0.00986488	0.0233011	0.00839323	0.00906078	0.0147768	0.0139405	0.0173411	0.0232891	0.0391951	TRPC4AP
994	1.23804e-44	8.4256e-44	0.035838	0.00615797	0.00471065	0.0148351	0.0106208	0.00611867	0.0136851	0.00124184	0.00677911	0.0153757	0.0169248	0.0167674	0.00398897	0.0293139	0.0230187	0.00800865	0.0249522	0.012101	0.0207102	0.0155264	0.00676807	0.00341111	0.0188153	0.015486	0.0136241	0.00178795	0.0253967	0.0107092	0.0174206	0.0154554	0.035838	WDR11
1009	1.09105e-25	4.58944e-25	0.013281	0.00454951	0.00465707	0.0171311	0.00222427	0.000275949	0.00642631	0.00683961	0.00883736	0.0035625	0.00353617	0.00309134	0.00713522	0.014566	0.00428674	0.00712917	0.00964309	0.00587259	0.00637822	0.013281	0.00682962	0.00775503	0.00910987	0.00807209	0.00672994	0.00831891	0.00817208	0.00575748	0.0129942	0.00856869	0.0153983	MIR34AHG
1009	1.78945e-53	1.46199e-52	0.0315006	0.00918537	0.00333438	0.0196986	0.0149648	0.0145725	0.0183602	0.0136647	0.00826805	0.0162787	0.00700678	0.00741294	0.0124057	0.0224834	0.0115112	0.00351882	0.012196	0.0105797	0.0257598	0.0175146	0.0126678	0.0159205	0.0213338	0.0214188	0.0158714	0.0146331	0.0180735	0.0140709	0.0166618	0.0211094	0.0315006	WWP2
1016	2.49213e-62	2.41774e-61	0.0417285	0.011946	0.00824948	0.0304239	0.0324051	0.0154044	0.00809198	0.00833774	0.00206847	0.0392013	0.0531068	0.0413575	0.00746749	0.0316453	0.0222224	0.00988876	0.0135345	0.00532793	0.0197492	0.0285013	0.0171567	0.00805464	0.0202613	0.0240498	0.0160119	0.00052769	0.00447696	0.0173071	0.0205171	0.0214203	0.0417285	FAM160A2
1017	1.77313e-39	1.07458e-38	0.0327312	0.018221	0.015232	0.0132246	0.0265627	0.0221964	0.0197286	0.00818694	0.0296207	0.0252909	0.0174383	0.0172847	0.00721509	0.0196688	0.0207184	0.0165297	0.0114115	0.00130615	0.023439	0.0165224	0.0177454	0.019914	0.00841885	0.0151555	0.00216788	0.00905629	0.00995804	0.0122932	0.0146122	0.0172537	0.0327312	MEPCE
1028	7.61891e-49	5.67703e-48	0.0411992	0.0145713	0.0120327	0.0376521	0.0166352	0.0104128	0.0252361	0.0099527	0.00913077	0.0161356	0.00848975	0.00417054	0.017601	0.0292965	0.0160367	0.0103017	0.0328561	0.0164487	0.0319213	0.0275414	0.0224835	0.0192306	0.0275217	0.0296757	0.0155253	0.0122918	0.0238353	0.0173733	0.0297027	0.0310049	0.0411992	PCGF3
1031	4.63164e-40	2.84394e-39	0.0272126	0.0103415	0.00889292	0.0180561	0.0144025	0.0182498	0.0117212	0.00508196	0.0581102	0.00935368	0.012084	0.00964086	0.0070945	0.0181658	0.0218984	0.00918969	0.00945811	0.0083651	0.0215678	0.020673	0.0132653	0.00774673	0.015468	0.0133958	0.0145564	0.0105988	0.0123898	0.0109844	0.018124	0.0131997	0.0272126	GTPBP2
1047	2.76557e-31	1.3582e-30	0.0184038	0.0104135	0.00756207	0.0111261	0.0111305	0.00931493	0.0110273	0.00623974	0.000721253	0.00863978	0.00390669	0.00469173	0.00883741	0.0134668	0.0133105	0.00992694	0.014345	0.00623158	0.0139212	0.0116174	0.0109829	0.0110534	0.0117609	0.0118258	0.00661894	0.00568632	0.0185329	0.0112677	0.0100347	0.0120009	0.0184038	SKIV2L
1055	4.50228e-34	2.39147e-33	0.0289599	0.00858772	0.008006	0.0215853	0.0169841	0.0190648	0.0114568	0.00633076	0.0438164	0.0169462	0.0289278	0.0202696	0.00092494	0.0246353	0.0143786	0.00914061	0.0233824	0.00939936	0.0200868	0.0230406	0.0114435	0.00235086	0.0115582	0.0118597	0.013566	0.00277288	0.0215488	0.00985824	0.0144229	0.0120802	0.0289599	TSC1
1059	1.46979e-27	6.51434e-27	0.0241677	0.0102634	0.0108933	0.0207483	0.0171055	0.0165649	0.0069935	0.00899984	0.017097	0.0180274	0.0233328	0.0198125	0.00916729	0.0137877	0.0285735	0.0103962	0.0177984	0.0130292	0.0182438	0.0143939	0.0030558	0.00779211	0.00181911	0.0101477	0.017985	0.00715515	0.0150489	0.0106379	0.0167744	0.0112612	0.0241677	COL9A2
1077	2.46766e-49	1.85728e-48	0.0312966	0.0137546	0.0116644	0.0279025	0.0246533	0.0233301	0.025628	0.0217215	0.0164372	0.0169679	0.0212009	0.0177919	0.0231456	0.0286252	0.00618278	0.00719327	0.0168077	0.00813526	0.0233056	0.0286923	0.0192893	0.0249585	0.0276385	0.0296566	0.019571	0.0237542	0.0248573	0.019004	0.0281977	0.0312966	0.0342801	DVL1
1080	4.045e-57	3.57192e-56	0.0454969	0.0157767	0.0161335	0.0153036	0.0106838	0.0110904	0.0195673	0.0130196	0.0389261	0.0142148	0.0174364	0.0168768	0.00761578	0.0232745	0.028217	0.0150236	0.00682585	0.0172523	0.0414737	0.0307362	0.0203856	0.00728937	0.0224039	0.0182756	0.0201351	0.0178916	0.0119601	0.02196	0.0222052	0.0159395	0.0454969	TRANK1
1088	1.72738e-64	1.74339e-63	0.048424	0.0117984	0.0104517	0.0179273	0.0145596	0.0141208	0.0159372	0.00860698	0.0379905	0.0139197	0.0122243	0.0104742	0.00674285	0.0312181	0.0271584	0.0136978	0.0340837	0.0161954	0.0334806	0.028174	0.0164285	0.00490421	0.0178007	0.0175916	0.0234348	0.00920913	0.0155643	0.0170838	0.0123091	0.0183263	0.048424	KMT2B
1101	1.72928e-38	1.02649e-37	0.018551	0.0135613	0.0121549	0.0185778	0.0176241	0.0162513	0.0158606	0.012389	0.0215983	0.0206035	0.0273086	0.0221784	0.00943706	0.0137107	0.0185622	0.0114577	0.0203478	0.0146144	0.0131043	0.018551	0.0123468	0.00736991	0.0119335	0.0157131	0.00867957	0.00453619	0.0137755	0.0143564	0.0173993	0.0154015	0.0209244	PNPLA7
1102	1.56132e-33	8.19458e-33	0.0253569	0.0139711	0.0099586	0.0207112	0.0221124	0.0166522	0.0216268	0.0161753	0.0410516	0.00646281	0.02503	0.00421925	0.0153026	0.0184788	0.0202648	0.00987652	0.0226626	0.00897855	0.023404	0.0170011	0.0178517	0.0151196	0.0168501	0.0186601	0.023867	0.0149527	0.0129918	0.0160972	0.0186263	0.017579	0.0253569	KIFC2
1102	5.71737e-44	3.82047e-43	0.0221415	0.0129757	0.00802941	0.0241866	0.0216964	0.0192789	0.0248675	0.012143	0.0199821	0.0248601	0.0200987	0.0228791	0.0152205	0.0258518	0.00654815	0.00572059	0.0122314	0.00491406	0.02453	0.0221415	0.0149662	0.00801589	0.0172714	0.0203059	0.0117753	0.0101872	0.00882024	0.0118882	0.0210104	0.0202334	0.0303256	RAB40C
1116	3.11405e-44	2.09591e-43	0.0313576	0.0108373	0.0105522	0.0190489	0.00992272	0.00773585	0.0135689	0.0035182	0.0171154	0.0128042	0.011833	0.00941535	0.00848067	0.0242146	0.0226921	0.0109084	0.0264578	0.0150262	0.0231914	0.0244755	0.013893	0.00644582	0.0168211	0.0190097	0.0140861	0.00829004	0.0268264	0.0156746	0.0162603	0.0182398	0.0313576	FAM160B2
1130	5.98006e-44	3.9952e-43	0.0310722	0.00846492	0.00591102	0.0173115	0.0129435	0.0210151	0.0180643	0.00925549	0.0190993	0.0163908	0.0103778	0.016018	0.0144118	0.0238015	0.0245692	0.00131966	0.0140521	0.00994339	0.0226617	0.000817623	0.0152939	0.0145032	0.0144083	0.0205155	0.0194121	0.00940394	0.0237877	0.0150755	0.0130727	0.0207103	0.0310722	MYD88
1133	2.15246e-13	6.31965e-13	0.00844802	0.00186924	0.000660297	0.00688958	0.00489559	0.00719341	0.00166791	0.0018536	0.00212769	0.00691804	0.00693676	0.0103788	0.00268632	0.00844802	0.00469432	0.00168683	0.01224	0.00598262	0.00708168	0.0067723	0.00328675	0.00316939	0.00559978	0.0083979	0.00093967	0.00265122	0.0113583	0.00548004	0.00515817	0.00783886	0.00940521	ARMCX5
1135	1.0186e-28	4.67392e-28	0.0242473	0.00241623	0.00489663	0.0111092	0.00182878	0.00401468	0.010312	0.00289306	0.0337225	0.0047102	0.00391351	0.00440806	0.00261058	0.0115741	0.0084492	0.00772556	0.00624638	0.00122498	0.00862449	0.0165398	0.00794331	0.000626241	0.0044265	0.00556981	0.00153315	0.00263993	0.0036585	0.00199448	0.00802712	0.0043206	0.0242473	HIST1H1E
1139	4.43216e-21	1.6434e-20	0.011847	0.00802894	0.00617076	0.000920801	0.00164057	0.00189115	0.0038424	0.00994099	0.0017575	0.00123756	0.000489629	0.00068084	0.0106079	0.00695236	0.00491645	0.00663022	0.00298969	0.00523505	0.00466692	0.00670585	0.00957424	0.0141355	0.00782016	0.0112186	0.00363499	0.00943266	0.000583103	0.00649088	0.00180652	0.011847	0.00480382	AC002306.1
1141	1.54684e-30	7.45373e-30	0.0140685	0.00804029	0.00487323	0.0124537	0.00865783	0.00961034	0.0103114	0.0101538	0.00763226	0.0097163	0.00610125	0.00772583	0.010418	0.0140685	0.0126139	0.00521481	0.00968171	0.00702867	0.0123915	0.0113878	0.00817676	0.0125468	0.0117916	0.0133212	0.0081117	0.00875249	0.014531	0.00762359	0.0118257	0.0124396	0.0150144	TNK1
1145	1.09186e-47	7.95026e-47	0.0336035	0.00491117	0.00355446	0.0224107	0.0120386	0.00422393	0.00927026	0.00780945	0.0139028	0.0149541	0.00608992	0.012267	0.0120054	0.0255063	0.0227801	0.00373355	0.0227396	0.0120076	0.0236721	0.0204629	0.0117611	0.00958573	0.021468	0.0226908	0.00856663	0.00440726	0.0279229	0.0126468	0.020076	0.0212512	0.0336035	UPF1
1149	1.57226e-41	1.00001e-40	0.0287277	0.00835002	0.00627379	0.013882	0.0103734	0.00291231	0.0125839	0.00986991	0.00217814	0.0114649	0.00719316	0.0122512	0.00343773	0.0199781	0.018484	0.00982375	0.0230604	0.00781313	0.0175051	0.0123923	0.0113984	0.00937056	0.0117534	0.0165954	0.0137872	0.00774258	0.0242235	0.0103207	0.0138999	0.0157563	0.0287277	WASHC1
1157	4.95823e-11	1.35041e-10	0.00478822	0.00418127	0.00387573	0.00335166	0.00254785	0.00279899	0.00537304	0.00402451	0.00145583	0.00221787	6.50281e-05	0.00109512	0.00476265	0.00383333	0.00408165	0.00441027	0.00199239	0.00177761	0.00491376	0.00397473	0.00391954	0.00521888	0.00397082	0.00511583	0.00249392	0.00414723	0.00306593	0.00352918	0.00478822	0.00524516	0.00380894	AL451042.1
1157	9.57586e-26	4.0336e-25	0.0131156	0.0080654	0.00603196	0.0145922	0.0280611	0.0228285	0.0144637	0.00544273	0.0382428	0.025438	0.000143827	0.0206535	0.0171689	0.0160401	0.0183379	0.00412038	0.00550794	0.00749256	0.0149403	0.0131156	0.0108256	0.0179134	0.0152587	0.0165109	0.00241673	0.0145142	0.00373033	0.00638613	0.0118164	0.0170812	0.0116054	SLCO4A1
1159	5.16029e-42	3.3148e-41	0.0222904	0.018799	0.0149346	0.021121	0.015475	0.0190447	0.0271073	0.0162604	0.0104041	0.0167034	0.00861426	0.00808333	0.0159841	0.0215598	0.0209455	0.0139122	0.0191208	0.00837652	0.0199872	0.0222904	0.0208374	0.018823	0.0172482	0.0194787	0.00644537	0.0181673	0.0150004	0.0149114	0.019628	0.0190397	0.0231293	LTK
1160	3.26037e-24	1.31584e-23	0.0242388	0.00616806	0.00549287	0.0144093	0.00683274	0.00793834	0.0282186	0.00195629	0.0243082	0.00821923	0.00926016	0.00901073	0.00106599	0.0174652	0.0275037	0.0055265	0.00551496	0.00543191	0.0163987	0.0242388	0.0094656	0.000965927	0.00978426	0.00806419	0.00813698	0.00770167	0.00438999	0.00717199	0.0115272	0.00757156	0.0182102	TANGO6
1174	4.19583e-28	1.88733e-27	0.0198555	0.00604351	0.00459525	0.016308	0.00836215	0.00963539	0.0122245	0.0085972	0.0285957	0.00963094	0.00549829	0.0111643	0.00781433	0.0164808	0.00126487	0.00563929	0.0146175	0.00938589	0.0101286	0.015166	0.0087061	0.00790227	0.00773724	0.0114656	0.00914001	0.0111072	0.0194094	0.00947922	0.0136273	0.0114235	0.0198555	AP005329.3
1179	6.5308e-53	5.28547e-52	0.037601	0.0123261	0.00720947	0.0214645	0.0174741	0.0178403	0.014838	0.0122127	0.0387756	0.015727	0.0293969	0.0119905	0.0164678	0.0273463	0.0258311	0.00964979	0.0217445	0.00884142	0.0280188	0.0157973	0.01484	0.0128712	0.0223385	0.0216473	0.0191766	0.00234701	0.0154581	0.0162519	0.0189609	0.0206173	0.037601	NPLOC4
1184	4.13314e-33	2.14279e-32	0.0255614	0.00702406	0.00612748	0.0124545	0.0155201	0.0158197	0.0213221	0.0150381	0.0179649	0.0147468	0.00946611	0.0184776	0.00926148	0.0234477	0.0358295	0.0064645	0.0211979	0.0106147	0.0220299	0.00827154	0.0107774	0.0124842	0.0243016	0.0253659	0.0171979	0.00597921	0.0273468	0.0126888	0.0128406	0.0270042	0.0255614	SGTA
1192	1.1632e-46	8.29325e-46	0.0355616	0.0105483	0.00874188	0.0307959	0.0163166	0.01488	0.0162743	0.00652053	0.0304946	0.0194618	0.0244478	0.0225429	0.00709654	0.0275922	0.0160198	0.00508719	0.0153323	0.0107711	0.0223856	0.0301364	0.0131182	0.00567165	0.0167526	0.0175159	0.0147198	0.0115842	0.0127238	0.0152522	0.0234215	0.015491	0.0355616	NR3C2
1198	6.79288e-46	4.76311e-45	0.0344606	0.00611533	0.00355393	0.0226519	0.0123266	0.0105569	0.0128159	0.002734	0.0219301	0.0145732	0.0152473	0.0144884	0.0047168	0.027404	0.0244547	0.0047327	0.0167606	0.0126462	0.0192409	0.01835	0.010472	0.0025025	0.00990041	0.0176507	0.01003	0.00658369	0.0108496	0.00986437	0.0214247	0.0145969	0.0344606	MBD6
1206	4.03255e-37	2.3083e-36	0.0261452	0.00635213	0.00501964	0.0207926	0.00696342	0.00979571	0.0191142	0.0073793	0.0188187	0.00829158	0.00599407	0.0067882	0.00375811	0.0174776	0.0122018	0.00698772	0.0202334	0.00730346	0.0226714	0.0197267	0.0108059	0.00164316	0.0120236	0.0118923	0.0110081	0.00749025	0.0180304	0.00653609	0.0148445	0.0119593	0.0261452	SIMC1
1208	3.32761e-44	2.23785e-43	0.0233781	0.00864491	0.00711162	0.0256955	0.00857168	0.00645065	0.0145424	0.00707222	0.0215823	0.00842969	0.00575504	0.00572422	0.00445305	0.0232033	0.00871864	0.00705501	0.0200225	0.00851551	0.0202742	0.0233781	0.0114718	0.00355901	0.0100365	0.014736	0.00844246	0.0102511	0.0167976	0.00900081	0.0202743	0.015245	0.0276614	PARD3B
1208	5.08847e-55	4.30083e-54	0.0413024	0.00761175	0.00737942	0.021735	0.0131311	0.0153403	0.0136809	0.0048168	0.00956912	0.0152755	0.0142964	0.0127224	0.00492746	0.0413584	0.0203799	0.00802417	0.0357815	0.0121779	0.0328336	0.0194144	0.0118341	0.00238749	0.015697	0.0216836	0.0110237	0.00657043	0.0308227	0.0119525	0.0184184	0.0178162	0.0413024	SPG11
1209	1.1429e-38	6.80345e-38	0.0196517	0.00488131	0.00256161	0.00943725	0.00552142	0.00179391	0.00311843	0.00106867	0.000526941	0.00710454	0.0116881	0.00187695	0.0104819	0.0136695	0.0192236	0.00136433	0.0236082	0.0116085	0.0157413	0.00786758	0.00918705	0.01106	0.015115	0.0166259	0.0156313	0.00441704	0.0144849	0.0104675	0.0108618	0.0151309	0.0196517	STRN4
1218	3.95194e-37	2.26293e-36	0.0315055	0.0106308	0.00466115	0.00391252	0.0162171	0.0152786	0.00765313	0.00221536	0.00169727	0.0194227	0.0139021	0.0115808	0.0128932	0.0262322	0.0198464	0.00643772	0.0339188	0.0145635	0.0293271	0.00704048	0.0160623	0.0181687	0.014705	0.0266138	0.0131789	0.00113639	0.029151	0.0177959	0.00930562	0.02578	0.0315055	SUPT6H
1221	4.14913e-42	2.66987e-41	0.0234916	0.0102623	0.00728944	0.00937136	0.0108646	0.0199326	0.00596273	0.000324138	0.032034	0.000270392	0.00672738	0.000468243	0.00281172	0.0173991	0.021078	0.00260353	0.0041272	0.00745104	0.0212111	0.0161227	0.0119374	0.000625222	0.00939841	0.0136644	0.00698265	0.00310715	0.0153459	0.0134609	0.00742601	0.0130271	0.0234916	B3GALT4
1222	4.47627e-41	2.81608e-40	0.0142451	0.00960597	0.00603325	0.0131229	0.00452053	0.00115163	0.0121444	0.0124424	0.00538927	0.00569931	0.00696517	0.00747103	0.0129649	0.0105135	0.0095317	0.00516382	0.0149308	0.00684267	0.0119026	0.0142451	0.0125035	0.0128896	0.0138266	0.0134245	0.00788185	0.0138908	0.0120579	0.0134155	0.0150009	0.0136206	0.0164845	PLA2G4F
1232	1.61421e-46	1.14576e-45	0.0239092	0.00370646	0.00227549	0.0259233	0.0131584	0.00671429	0.0126117	0.0191909	0.00997294	0.0170264	0.0239633	0.0208335	0.0209755	0.0236303	0.0109418	0.00626891	0.00975532	0.0119967	0.0152059	0.0208314	0.00320161	0.0213051	0.0187683	0.0206797	0.0113222	0.0179787	0.0191453	0.0130253	0.0239092	0.0218573	0.0269062	UNC5CL
1235	7.26442e-46	5.08525e-45	0.0226774	0.0136431	0.011146	0.0151608	0.0153935	0.013419	0.0132051	0.00739506	0.0181289	0.0148017	0.0160026	0.0116934	0.00588212	0.0223663	0.0230233	0.00942754	0.00985361	0.00669916	0.0243789	0.00584362	0.0185285	0.0197994	0.0193059	0.0220898	0.013908	0.0207954	0.00861272	0.0184871	0.0226774	0.0216487	0.0243745	LHFPL2
1260	7.40341e-63	7.2495e-62	0.0537164	0.0175521	0.0154665	0.032301	0.0244957	0.00604259	0.0168398	0.0122281	0.0350143	0.0345457	0.0431756	0.0367169	0.00831864	0.0356126	0.0225907	0.0151644	0.0248557	0.0107864	0.0345772	0.0298603	0.0215631	0.0173993	0.0264618	0.0333284	0.0176579	0.00203458	0.00879195	0.022179	0.0125526	0.0335048	0.0537164	RHOT2
1260	1.35531e-40	8.42682e-40	0.0583387	0.0153265	0.0127324	0.0293512	0.0081018	0.00999695	0.0162688	0.00945266	0.0739316	0.0132827	0.0191617	0.0105559	0.0110303	0.0354228	0.0269376	0.0146077	0.0389356	0.00890483	0.0369673	0.0402721	0.0225643	0.00870642	0.0237897	0.0222977	0.0162285	0.00787675	0.0229393	0.0118149	0.0210073	0.0214907	0.0583387	BRD1
1266	6.73354e-19	2.34069e-18	0.0119329	0.00411471	0.00453271	0.00118522	0.000721372	0.000649857	0.00620391	0.00419644	0.00185953	0.00193375	0.000309417	0.000647136	0.00452876	0.0101639	0.0105716	0.00430059	0.0143284	0.00831243	0.00750668	0.00280051	0.00608098	0.00539918	0.00260399	0.0079055	0.00733234	0.00410456	0.0118684	0.00809056	0.00498821	0.00788472	0.0119329	ZNF100
1267	2.21215e-17	7.35878e-17	0.0178665	0.00418054	0.00450345	0.0111335	0.0174095	0.017639	0.0136915	0.00229191	0.0270606	0.0162364	0.0189535	0.0172664	0.00157999	0.00784655	0.0114179	0.00489981	0.00663227	0.00217371	0.00680202	0.0178665	0.0059416	0.000118215	0.00520992	0.00319159	0.00358402	0.00432569	0.00468204	0.00311439	0.0105884	0.00304405	0.0144422	AC023794.7
1273	1.32197e-39	8.0334e-39	0.0251012	0.00901732	0.00649552	0.0228531	0.0154601	0.0143779	0.00823331	0.00870696	0.0205585	0.0163028	0.00283754	0.00939994	0.00700484	0.0227205	0.0199104	0.00562879	0.0192505	0.00991829	0.0177864	0.0147686	0.0106868	0.00576134	0.0140728	0.0148626	0.0129383	0.004112	0.0160348	0.0118313	0.0151489	0.0162255	0.0251012	MTMR3
1301	1.4294e-35	7.87441e-35	0.0126401	0.00853694	0.00609597	0.0125462	0.00573892	0.00679394	0.00628977	0.0116975	0.0105344	0.00553662	0.00533527	0.00626993	0.0111611	0.013334	0.0108711	0.00735901	0.0104689	0.00675842	0.0098578	0.0119385	0.00944748	0.00995331	0.011943	0.0123471	0.0031598	0.0057424	0.0078883	0.00738516	0.0126401	0.0121015	0.0127787	AC128688.2
1301	7.82912e-15	2.40893e-14	0.0105592	0.00508066	0.0047222	0.0112933	0.00419463	0.00510707	0.0091265	0.00472891	0.0100878	0.00371899	0.0013943	0.00191604	0.00567479	0.00949151	0.00421687	0.00597208	0.00622575	0.0011853	0.00747505	0.0105592	0.00664788	0.00539709	0.00635777	0.00522913	0.00352121	0.00620145	0.00525981	0.00406484	0.00835834	0.0052587	0.0121825	HIST1H2AH
1301	2.13203e-46	1.51044e-45	0.040041	0.0101369	0.00863104	0.0216306	0.0192339	0.0151619	0.0205031	0.005637	0.00362701	0.0205611	0.0162382	0.0172164	0.00879766	0.0258095	0.0279375	0.010271	0.0202666	0.011287	0.0283742	0.0169055	0.0139887	0.00790882	0.0133536	0.0174142	0.0167281	0.0115903	0.010016	0.0175739	0.0156784	0.0148544	0.040041	DPP9
1302	1.00971e-29	4.7615e-29	0.0122435	0.011561	0.00821011	0.00960044	0.00295049	0.00429924	0.00580676	0.0109632	0.00377518	0.00327001	0.00273498	0.00220322	0.0115977	0.00826816	0.00725523	0.00499072	0.0100992	0.00684805	0.0114856	0.00815453	0.0122435	0.0163426	0.00985007	0.011519	0.00561474	0.010937	0.00681823	0.0106051	0.0111696	0.0114965	0.0107757	GLDN
1308	1.41318e-40	8.78012e-40	0.021599	0.0106702	0.00807217	0.00462864	0.00662687	0.00548253	0.0107025	0.00882187	0.0074277	0.00685888	0.00644313	0.00402034	0.00854057	0.0134675	0.0185976	0.00868248	0.0181166	0.00965725	0.0127131	0.00221999	0.0111441	0.0136179	0.0101475	0.01456	0.0104646	0.00643734	0.0148856	0.00783331	0.0136012	0.014593	0.021599	CLCN7
1310	1.66967e-16	5.40567e-16	0.00947328	0.00376151	0.00397414	0.00336613	0.0041637	0.00167065	0.00225571	0.00165511	0.0040336	0.00510369	0.00526323	0.00510642	0.0024447	0.00947328	0.00668993	0.0058983	0.00649046	0.00514472	0.00534941	0.00882055	0.00476863	0.00166197	0.00248911	0.0053385	0.00601083	0.00198763	0.00595293	0.00581319	0.00219571	0.00480555	0.0127525	AC013394.1
1319	4.93703e-45	3.39369e-44	0.024216	0.0112306	0.00834362	0.0158486	0.0118108	0.00386991	0.00882488	0.014426	0.0088286	0.0140438	0.0101004	0.00668462	0.0142014	0.0173033	0.0229673	0.00620215	0.0133608	0.0107318	0.0172311	0.0121475	0.0151123	0.0133878	0.0136616	0.0208183	0.00780729	0.00330202	0.0139398	0.0127795	0.0122168	0.0209908	0.024216	FZR1
1325	2.50493e-31	1.2311e-30	0.0125861	0.0103261	0.00660676	0.00863519	0.00780283	0.00970866	0.00900314	0.0122637	0.0144823	0.0126799	0.0177958	0.0160352	0.013289	0.00972696	0.0114448	0.00499577	0.00439703	0.00473689	0.00838285	0.0106178	0.0127966	0.0157789	0.0111435	0.0138257	0.0026105	0.0115944	0.00174028	0.00962153	0.0125861	0.0130982	0.00840137	AP000439.2
1332	4.26212e-50	3.26205e-49	0.0368324	0.00574737	0.00237131	0.0287238	0.0167075	0.0175816	0.0181974	0.00980895	0.0240416	0.0174618	0.0155231	0.014247	0.00725178	0.0233104	0.0185483	0.00614219	0.0179302	0.0072775	0.0286322	0.0207905	0.0112126	0.00221253	0.0164915	0.0157578	0.00712926	0.00167897	0.0180116	0.0109719	0.0219094	0.0164729	0.0368324	IQCE
1332	1.11339e-15	3.51541e-15	0.00787655	0.00336687	0.00367081	0.00857528	0.00227299	0.00400993	0.00634964	0.000910317	0.00793471	0.00224069	0.0025571	0.0017502	0.0023702	0.00748055	0.00459874	0.00368784	0.00797316	0.00424007	0.00466621	0.00373131	0.00380055	0.00229692	0.00457391	0.00442093	0.00410528	0.00313183	0.00696778	0.00363928	0.00552693	0.00464419	0.00787655	AC093525.6
1332	5.19845e-40	3.18731e-39	0.0249176	0.00664522	0.000834111	0.0152553	0.0219996	0.00291509	0.0163898	0.0133087	0.0159576	0.0257162	0.0282506	0.0245424	0.0180359	0.0220352	0.0111714	0.0105061	0.0180857	0.00929563	0.0197183	0.0122763	0.0116347	0.0219375	0.0205709	0.0241166	0.00939255	0.0078952	0.0135477	0.0137937	0.0180044	0.0249176	0.0281747	MBD3
1338	1.89465e-32	9.64082e-32	0.0228142	0.0109539	0.00665513	0.014287	0.00871837	0.00480693	0.00737813	0.00798954	0.00644045	0.00885174	0.00519902	0.00231757	0.00506397	0.0103665	0.0224565	0.00792459	0.0120274	0.00544053	0.0129816	0.0157339	0.0113786	0.0129215	0.0122868	0.01387	0.00608207	0.0058891	0.0109122	0.0129143	0.0104003	0.0162766	0.0228142	E4F1
1338	2.99207e-38	1.76514e-37	0.0331973	0.00623288	0.00720482	0.0269421	0.00541507	0.00261849	0.00782913	0.00814461	0.0405621	0.00594986	0.0141191	0.00873707	0.00675167	0.0232937	0.0147191	0.00699563	0.0268393	0.00730997	0.0152101	0.0285548	0.00784783	0.00124231	0.0158001	0.0126708	0.0140055	0.00422218	0.0185745	0.00666985	0.0212174	0.0119547	0.0331973	SIM2
1340	8.91527e-50	6.77544e-49	0.0276536	0.00313688	0.00273228	0.0318869	0.0185629	0.0212494	0.0280087	0.0165051	0.0146079	0.0189586	0.0123614	0.0172311	0.0165363	0.0293753	0.0244385	0.00508897	0.0171921	0.00293291	0.0110454	0.0209757	2.83759e-05	0.0103065	0.0220322	0.0153227	0.0177387	0.0199325	0.0200005	0.0143766	0.0276536	0.0165325	0.0318263	SLC41A2
1350	1.54068e-32	7.85993e-32	0.029306	0.00498524	0.00515405	0.0132015	0.0089654	0.00546249	0.00750527	0.00755077	0.0129855	0.015733	0.0204491	0.0163295	0.00531445	0.0154087	0.0258238	0.00729589	0.0181156	0.0129321	0.0197652	0.0180343	0.00900114	0.0114033	0.00646087	0.0128744	0.00950494	0.00120779	0.0158779	0.00956372	0.00685934	0.0170671	0.029306	CXXC1
1353	6.3192e-37	3.59758e-36	0.0148108	0.00826717	0.00343803	0.0118099	0.0131485	0.00734895	0.0126921	0.00844862	0.00175739	0.0147467	0.0169307	0.0179977	0.0106515	0.0106242	0.01151	0.00621176	0.00958504	0.00645166	0.0148946	0.0106819	0.0120268	0.0124423	0.0111425	0.0115296	0.011474	0.0105245	0.00718755	0.011673	0.0148108	0.0126516	0.0132208	MGAT3
1354	2.27682e-26	9.75472e-26	0.0228798	0.0132853	0.00865516	0.0166083	0.00806821	0.00571792	0.00884618	0.0105666	0.010874	0.0130265	0.0107241	0.011907	0.0123051	0.0196397	0.0200468	0.00963027	0.0177737	0.010865	0.0168743	0.0153213	0.0127368	0.00848522	0.0136332	0.0183445	0.0142683	0.010005	0.0151214	0.015196	0.00565203	0.0194228	0.0228798	HDAC10
1356	5.77086e-23	2.25129e-22	0.0281151	0.00976694	0.00904846	0.0281151	0.0121358	0.0138238	0.0148847	0.00693393	0.0253703	0.00984195	0.00395272	0.0065248	0.00530479	0.0166273	0.0129972	0.00896226	0.0166148	0.00560544	0.0164372	0.0190619	0.0126917	0.00236378	0.00888324	0.00537152	0.00508866	0.00884655	0.0152907	0.00620641	0.0164372	0.00510518	0.0262027	AC087623.3
1364	9.13723e-49	6.80081e-48	0.029238	0.0113634	0.00946918	0.0221517	0.0218076	0.0238299	0.0164484	0.014904	0.0671644	0.0158032	0.0416112	0.0200826	0.0115711	0.0223315	0.0144079	0.00945518	0.0022404	0.00263085	0.0208601	0.0212713	0.0150705	0.0125831	0.01594	0.017892	0.0134402	0.0125407	0.000648772	0.0139671	0.0165668	0.0182286	0.029238	MIGA2
1374	4.62396e-44	3.09847e-43	0.0227661	0.0122373	0.0107572	0.017775	0.0204584	0.0205121	0.0155837	0.00917345	0.00389905	0.0229371	0.0232152	0.0266812	0.0107792	0.0196745	0.0200543	0.0100739	0.00706939	0.00637406	0.0203129	0.0137697	0.0111846	0.00589762	0.0143374	0.0145149	0.0103496	0.00909911	0.0179085	0.0122542	0.0116149	0.0136161	0.0227661	RIPK3
1375	3.54269e-45	2.44023e-44	0.0263709	0.0140098	0.0114534	0.0266477	0.0134554	0.00857212	0.0130592	0.0107221	0.00244525	0.0100042	0.0166599	0.00338027	0.00204441	0.0240712	0.0237522	0.0108855	0.0194638	0.0154701	0.0205503	0.0217621	0.0146007	0.0106347	0.016508	0.0201691	0.00550585	0.00641506	0.0161831	0.0150371	0.023169	0.0190108	0.0263709	IL17RC
1375	7.03895e-27	3.05556e-26	0.0136119	0.00752976	0.0057054	0.00710927	0.00414667	0.00335581	0.0112597	0.000379905	0.00612581	0.00740517	0.00665756	0.00707944	0.00879311	0.0136119	0.0221449	0.00693149	0.0141189	0.0098833	0.0154526	0.00562515	0.00849789	0.00914408	0.0128868	0.013194	0.0119247	0.00618414	0.0106481	0.010096	0.00938321	0.012859	0.0148262	DAGLB
1392	5.04159e-38	2.95758e-37	0.0281991	0.0104963	0.0058766	0.00743424	0.0264192	0.0289195	0.0159087	0.0158641	0.0263661	0.0318684	0.0530626	0.0410216	0.0158794	0.0263709	0.0161325	0.000219823	0.0169983	0.0140656	0.0240209	0.0218168	0.0163061	0.0125533	0.0256383	0.0261095	0.0239435	0.00662232	0.00305468	0.0233144	0.0121479	0.0281991	0.0316717	VRK3
1396	2.78113e-42	1.79822e-41	0.0290893	0.00695292	0.00413593	0.0275758	0.00870572	0.0150602	0.0195198	0.00843007	0.0144284	0.0110677	0.0123145	0.0114471	0.00990375	0.0270811	0.0134477	0.00672725	0.0131836	0.00250052	0.0213155	0.0183689	0.0102593	0.00791932	0.0159916	0.0166522	0.00979999	0.0107864	0.018763	0.00575788	0.0220856	0.0168927	0.0290893	TMEM144
1403	2.71063e-54	2.25749e-53	0.0414841	0.0140671	0.0107429	0.0242584	0.0163048	0.00991033	0.0100287	0.0114235	0.00807414	0.0219636	0.0267818	0.0192946	0.0129348	0.0331044	0.0248032	0.00862464	0.0181406	0.012656	0.0260671	0.0205975	0.0158124	0.00824198	0.0225155	0.0259875	0.0165788	0.000206877	0.0191662	0.0176299	0.0228851	0.0253825	0.0414841	SCAMP4
1410	1.59452e-37	9.23929e-37	0.0219219	0.0111922	0.00546691	0.0130636	0.0149363	0.0131761	0.0203342	0.00854749	0.00523248	0.0139606	0.00425584	0.00631206	0.012699	0.0219325	0.0149609	0.00060392	0.00994055	0.0073463	0.0193184	0.0160723	0.0134165	0.0174912	0.0170064	0.0218328	0.0152442	0.0178056	0.0111224	0.0129941	0.0187298	0.0219219	0.0171354	INPP5A
1427	7.65581e-17	2.50401e-16	0.0206886	0.00258168	0.00396781	0.0145251	0.00924664	0.0110835	0.0206886	0.00233307	0.0336133	0.00748369	0.00286616	0.00338389	0.000148019	0.0102446	0.0118312	0.00581898	0.0194976	0.00689482	0.0191814	0.014148	0.00404259	0.00116023	0.00995735	0.00685914	0.0132138	0.0104958	0.0177243	0.00650623	0.0102811	0.00634619	0.0194433	SYCP2
1435	8.10629e-29	3.73497e-28	0.0236089	0.00293998	0.0019183	0.0106164	0.0142701	0.0208365	0.0139273	0.00463489	0.0192338	0.00794608	0.0109375	0.0116785	0.00160506	0.0185868	0.0262271	0.00447583	0.0198714	0.00950957	0.0205361	0.00918155	0.010558	0.00331817	0.0111592	0.0114777	0.0144431	0.00908874	0.0156271	0.00901747	0.0156757	0.0116633	0.0236089	ZDHHC14
1437	3.27047e-36	1.82869e-35	0.0192687	0.0086735	0.00491043	0.007551	0.0126294	0.0131465	0.00458309	0.00707989	0.00676073	0.0151647	0.0155829	0.0107126	0.00529848	0.0192687	0.0241014	0.00210809	0.0133262	0.00737979	0.0102454	0.00879076	0.00719038	0.00625829	0.009698	0.0160749	0.00867351	0.00649691	0.0120364	0.0085244	0.00472683	0.0160721	0.0188991	MAN2B2
1437	3.39952e-55	2.87985e-54	0.0393776	0.00552979	0.00486456	0.0142218	0.00488978	0.00197205	0.015522	0.00114176	0.0291189	0.0126262	0.0143544	0.0148123	0.00640164	0.0289735	0.0249338	0.00988518	0.0221223	0.00696332	0.0239984	0.0160289	0.0106309	0.00690146	0.0103404	0.0205296	0.0112044	0.00769351	0.010204	0.0113537	0.0104711	0.0186262	0.0393776	TRPM7
1437	6.23984e-36	3.46649e-35	0.0305814	0.0172824	0.012469	0.0214232	0.00877332	0.0111074	0.0178555	0.01003	0.00353025	0.00213467	0.00917971	0.00672737	0.0129159	0.0220139	0.00246036	0.0117197	0.0136319	0.00943399	0.0164782	0.0209574	0.0171967	0.00909214	0.0089682	0.0190914	0.00924475	0.00587444	0.015947	0.0158836	0.0176768	0.0193046	0.0305814	CCDC159
1445	5.05033e-32	2.53408e-31	0.0161692	0.00294501	0.00321064	0.0138653	0.0141663	0.0154163	0.0127514	0.0131181	0.0213068	0.02357	0.0319688	0.0285799	0.0105734	0.0161692	0.0141781	0.00439335	0.0220686	0.00430193	0.0152389	0.0111446	0.0123373	0.0145006	0.0126789	0.0158931	0.0128787	0.0128938	0.00640342	0.00616954	0.0121511	0.01596	0.0159688	TEDC1
1456	2.15842e-30	1.03398e-29	0.016105	0.00504109	0.00311411	0.00831875	0.00407511	0.00247572	0.0103305	0.00543618	0.00352132	0.00574638	0.00544001	0.000747776	0.00481165	0.00846206	0.0134738	0.00338738	0.0169153	0.00524374	0.0124965	0.00722267	0.00697218	0.00706749	0.0070777	0.00809275	0.00763561	0.00539734	0.00554688	0.0052375	0.00828205	0.00678377	0.016105	FBXL19
1463	4.90021e-32	2.46096e-31	0.0192172	0.00942392	0.00772353	0.0106388	0.00793973	0.0060334	0.0137091	0.00579218	0.0208396	0.00247172	0.00578698	0.00205066	0.00741066	0.0192172	0.0181608	0.00948608	0.0192617	0.00883749	0.0145662	0.0171609	0.0102459	0.0077828	0.0111661	0.012433	0.0104868	0.00891786	0.0241404	0.0102118	0.0103169	0.011974	0.0175697	SZT2
1468	7.83992e-24	3.13204e-23	0.0155839	0.00545079	0.00545347	0.0154786	0.00764146	0.0123822	0.0115351	0.00175111	0.0303738	0.00550696	0.014907	0.008352	0.00637749	0.0145445	0.018144	0.00611406	0.0056575	0.00569437	0.0111237	0.0115767	0.00690634	0.00420073	0.00781315	0.011215	0.00117678	0.00234197	0.0085395	0.00655349	0.0114484	0.0106092	0.0155839	PAN2
1523	1.01692e-55	8.71591e-55	0.0325618	0.00329847	0.0012164	0.0210238	0.0176075	0.011935	0.016606	0.0101193	0.0250424	0.0187992	0.0270613	0.0174689	0.0119507	0.0255294	0.0201024	0.00624305	0.0158224	0.00585928	0.0226188	0.0185453	0.0112028	0.0120718	0.0188008	0.0193648	0.00869892	0.00432182	0.0182951	0.0112455	0.0184277	0.0175815	0.0325618	INTS1
1529	9.68294e-10	2.53214e-09	0.00546401	0.00562453	0.00495573	0.0041331	0.00559497	0.00592624	0.00659072	0.00406664	0.00987557	0.0040795	0.00166982	0.00232192	0.00393899	0.00353714	0.00502038	0.00460337	0.00312167	0.00286333	0.00725514	0.00488711	0.00527661	0.00547851	0.00470844	0.00478192	0.00205295	0.00462402	0.00321686	0.00314289	0.00546401	0.00463262	0.0050533	LINC01022
1534	1.89451e-21	7.09922e-21	0.0155751	0.00563459	0.0038174	0.0041325	0.00392594	0.00677653	0.00893341	0.00971168	0.00414164	0.00626814	0.0129126	0.0119817	0.00369275	0.011796	0.0152761	0.00698651	0.0229838	0.0102045	0.0135027	0.00927572	0.0101955	0.013317	0.0111223	0.0148359	0.0153313	0.00899713	0.0273804	0.00826397	0.00619158	0.0129662	0.0155751	NCAPH2
1545	5.90885e-23	2.30405e-22	0.0207153	0.00823759	0.00705781	0.0144673	0.00989238	0.0192079	0.0121252	0.00672986	0.0362601	0.00548984	0.0161279	0.00500228	0.0096709	0.022363	0.0212819	0.00700582	0.016758	0.0112785	0.0186745	0.0156383	0.0103713	0.00667735	0.0128076	0.0159102	0.00982164	0.00663151	0.0115427	0.0119894	0.0122026	0.015787	0.0207153	HEATR5B
1546	5.87124e-32	2.94071e-31	0.0174078	0.00392635	0.00130453	0.0175505	0.00426772	0.00432053	0.0113225	0.000529907	0.00302774	0.00493885	0.00165127	0.00473615	0.00912373	0.0174078	0.00462026	0.00383146	0.00928497	0.00626015	0.0126113	0.0139061	0.00801519	0.00913369	0.0119872	0.0139798	0.00654641	0.00695073	0.0106721	0.00549833	0.0149448	0.014086	0.0168911	PHLPP1
1548	3.15993e-33	1.64409e-32	0.0184265	0.00591504	0.0055534	0.017128	0.0028509	0.00468539	0.00855273	0.00505592	0.00502409	0.00435546	0.0024155	0.0050977	0.00145521	0.0129712	0.0180545	0.00367137	0.00994691	0.00933239	0.0114638	0.0138448	0.00651999	0.00419325	0.0131544	0.0112905	0.00981535	0.00747408	0.0106202	0.00990066	0.0147667	0.0114422	0.0184265	PTPN21
1556	1.96927e-28	8.96382e-28	0.0206484	0.00939888	0.00783386	0.00474792	0.014318	0.0131778	0.0165663	0.000573238	0.0262417	0.0168628	0.0171527	0.0170731	0.00266619	0.0170786	0.0180407	0.00899668	0.0108796	0.0094235	0.0172607	0.0144087	0.0101282	0.0047798	0.00547796	0.011308	0.0089346	0.00871779	0.00284476	0.0101536	0.00388647	0.010909	0.0206484	ZNF701
1566	4.37292e-28	1.96488e-27	0.0183502	0.00402192	0.00302841	0.00827495	0.00324577	0.00368295	0.00777772	0.000536218	0.015801	0.00448868	0.00732553	0.00420627	0.00425571	0.0129045	0.014802	0.00176424	0.0211659	0.00704293	0.00819614	0.00873752	0.00592623	0.00587028	0.0088419	0.0109092	0.00982031	0.00358283	0.0194717	0.00562507	0.00634896	0.0114058	0.0183502	ZNF384
1569	8.5771e-22	3.24781e-21	0.0116289	0.00636711	0.00483723	0.0120298	0.0244961	0.0309127	0.00946959	0.00440128	0.0628065	0.0150471	0.0368797	0.025318	0.00697333	0.0159516	0.0155794	0.00504031	0.0120622	0.00729957	0.0110233	0.0116289	0.00727494	0.0051846	0.00695169	0.00948039	0.0036485	0.00457312	0.00502342	0.00739383	0.00967204	0.0090135	0.0118173	AC004918.1
1577	5.39588e-38	3.16376e-37	0.0273183	0.0105176	0.00590109	0.014241	0.0149672	0.011677	0.019233	0.0132068	0.00293493	0.0162959	0.00572948	0.00860412	0.0132933	0.0205269	0.0214573	0.00387577	0.0202048	0.010294	0.0221941	0.0169752	0.0147565	0.0110906	0.0163773	0.0196982	0.0108716	0.00830931	0.0183704	0.0147718	0.0156689	0.0188833	0.0273183	SMG5
1604	5.20095e-38	3.05e-37	0.0221312	0.00917237	0.00555538	0.00342319	0.014033	0.00687084	0.010627	0.00899123	0.00372235	0.0205013	0.0341114	0.0262168	0.00960074	0.0181352	0.0192472	0.00584427	0.0188616	0.0105445	0.0148134	0.00656465	0.0124338	0.0116822	0.0135811	0.0162396	0.0126283	0.00961596	0.0161647	0.0122353	0.0122369	0.0162811	0.0221312	AP5Z1
1605	5.01833e-16	1.60077e-15	0.0167348	0.005217	0.00397254	0.0170436	0.00243855	0.00447316	0.0113819	0.00786418	0.014393	0.00460226	0.000771933	0.00217821	0.00756546	0.0134742	0.0116634	0.00492928	0.0149165	0.012963	0.0101903	0.0140479	0.0079321	0.00418022	0.0137339	0.00850872	0.0132495	0.00925747	0.0116421	0.00898098	0.0130262	0.00843426	0.0167348	MYBPC1
1615	5.19441e-22	1.97607e-21	0.0154742	0.00976355	0.00582451	0.00828554	0.016644	0.015934	0.0140055	0.0123145	0.0249933	0.0185766	0.0162961	0.0183817	0.0139839	0.0125001	0.0108884	0.00470491	0.00740781	0.00868382	0.0154742	0.0103583	0.0112575	0.0118281	0.0110014	0.0142623	0.00797556	0.012089	0.0109833	0.0117919	0.00729131	0.0119507	0.0133216	TMEM102
1635	7.9847e-32	3.97788e-31	0.0174476	0.0102262	0.00608751	0.0137749	0.0102176	0.000557041	0.0122172	0.00848458	0.00729895	0.00936126	0.00625855	0.00615069	0.00551604	0.0155999	0.0139193	2.46051e-05	0.00778141	0.00539909	0.0124945	0.0119549	0.0126591	0.0121602	0.0108062	0.0174476	0.00525745	0.00505949	0.00505581	0.0104106	0.0137461	0.0180871	0.0119574	TEF
1646	4.15228e-45	2.85601e-44	0.0267293	0.00718447	0.00438059	0.0169913	0.0151832	0.0131085	0.00540424	0.00948589	0.0175601	0.01553	0.0131758	0.0127929	0.0141311	0.0206193	0.0114205	0.0041321	0.00833769	0.00342923	0.0236126	0.0178022	0.0103249	0.0091627	0.0186766	0.0201455	0.00847126	0.00317516	0.00625095	0.0114289	0.0171687	0.0199485	0.0267293	GRAMD4
1652	4.10745e-25	1.70174e-24	0.0226575	0.0069891	0.00614891	0.0261142	0.00482172	0.000453384	0.0132058	0.00120848	0.0112044	0.00617405	0.00745965	0.00693811	0.000721343	0.0225169	0.00578627	0.00845099	0.00691766	0.00582446	0.0103558	0.0226575	0.00730783	0.00149066	0.0103623	0.0118293	0.00701082	0.00381656	0.0123359	0.00314952	0.0169674	0.0119698	0.0201829	MIPOL1
1658	5.08952e-09	1.29893e-08	0.00816834	0.00320426	0.00308197	0.00624099	0.00339535	0.00339417	0.0020494	0.00111811	0.00514339	0.00225856	0.00109407	0.0014961	0.00157693	0.00478738	0.00489623	0.00340311	0.00259403	0.00206274	0.00391977	0.00468416	0.00344032	0.00182978	0.00320638	0.00310069	0.00225918	0.00219145	0.00350023	0.0028857	0.00442922	0.00298297	0.00816834	AL136040.1
1667	4.41591e-52	3.51951e-51	0.0368012	0.00824268	0.007551	0.0132421	0.0127712	0.0150584	0.0170073	0.00645391	0.0201065	0.0133955	0.0107547	0.00882024	0.00878069	0.0282783	0.0222014	0.0102787	0.0223147	0.00833159	0.022546	0.0233935	0.0119898	0.00288563	0.0115906	0.0162758	0.00735756	0.00336522	0.0176448	0.0117568	0.00963321	0.0166183	0.0368012	KDM4C
1668	4.64718e-11	1.26744e-10	0.00811873	0.00200734	0.00176664	0.00358215	0.00343834	0.000538482	0.00188473	0.000673864	0.00247708	0.00487613	0.00443997	0.00627105	0.00160228	0.00557179	0.00376519	0.00162938	0.0084381	0.00176675	0.00406978	0.00555582	0.00261078	0.000911628	0.00313314	0.00352475	0.00216117	0.00280166	0.00847059	0.00291676	0.00246263	0.00309169	0.00811873	ZNF841
1674	5.08901e-37	2.90412e-36	0.0282297	0.0104886	0.00690944	0.0197486	0.0117981	0.00662157	0.015916	0.014917	0.0118022	0.010935	0.00790945	0.00685272	0.0189717	0.0224339	0.0193444	0.00626786	0.0181806	0.0082249	0.0158916	0.0186514	0.0147151	0.0141588	0.0198342	0.0207765	0.00875505	0.0101535	0.0200942	0.0133496	0.0187738	0.0203394	0.0282297	PCNX3
1678	7.67141e-20	2.74465e-19	0.0110905	0.0116434	0.00836934	0.0051291	0.00741866	0.00633685	0.0066018	0.00376345	0.00128696	0.00518857	0.00464383	0.0027657	0.0074643	0.00952266	0.0117955	0.00116384	0.00263311	0.00446344	0.0096119	0.00112388	0.0121559	0.0158151	0.0110905	0.0110294	0.0117774	0.0108013	0.00229626	0.0119692	0.0103757	0.0110056	0.00879868	MB21D2
1688	2.5276e-25	1.05174e-24	0.0148189	0.0049956	0.0037807	0.00606953	0.00571541	0.00504612	0.00839354	0.0021029	0.00443368	0.0081622	0.00300742	0.0039473	0.00245994	0.0115704	0.00832314	0.00564996	0.0119835	0.00402128	0.00948756	0.00684993	0.00568681	0.00740375	0.00142249	0.00932142	0.00558569	0.00495067	0.00571157	0.00290778	0.00453129	0.00802276	0.0148189	MUTYH
1711	9.93997e-18	3.33333e-17	0.00812255	0.00513616	0.00354788	0.00854837	0.00404947	0.00413949	0.00631047	0.00419202	0.00403885	0.00446467	0.00147913	0.00412664	0.00542092	0.00803893	0.00612557	0.00169668	0.00671087	0.00349928	0.00749851	0.00812255	0.00662812	0.00520856	0.00360091	0.00669637	0.00280474	0.00486991	0.00574498	0.0038931	0.0080568	0.00604071	0.00786228	ANKDD1B
1718	3.13205e-29	1.45751e-28	0.0233409	0.0066228	0.00622263	0.0219298	0.0113374	0.00723684	0.00687274	0.00269799	0.0232439	0.0141147	0.0216504	0.0158704	0.00278885	0.0152166	0.0136895	0.00708628	0.0189679	0.00752062	0.008888	0.019535	0.00683302	0.00287406	0.00473642	0.00872032	0.00460249	0.000992628	0.0102133	0.00672267	0.0155938	0.00827847	0.0233409	CFAP44
1719	1.42728e-25	5.97978e-25	0.0163533	0.00406701	0.00397237	0.015709	0.00290332	0.00389862	0.0125104	0.00129523	0.00439304	0.00567702	0.00636328	0.00640272	0.00605553	0.0136325	0.00695487	0.00549776	0.00287483	0.00423607	0.0122787	0.0130152	0.00446168	0.00164219	0.00538655	0.00913363	0.0031191	0.00110124	0.00393683	0.00561158	0.00872974	0.00871107	0.0163533	ZNF440
1720	2.60536e-40	1.6077e-39	0.0230101	0.003937	0.00265346	0.0181748	0.0195742	0.00631926	0.0199326	0.0106901	0.0132239	0.0215184	0.020269	0.01941	0.00920579	0.0176829	0.0072689	0.0030813	0.0114008	0.00588194	0.0133773	0.0174412	0.00319798	0.0119259	0.016032	0.0161397	0.00808034	0.0124073	0.0174777	0.00430321	0.0168921	0.0167924	0.0230101	CCHCR1
1720	1.59323e-44	1.081e-43	0.0282847	0.00891607	0.00663578	0.015407	0.00628425	0.00888566	0.0163955	0.00918372	0.0122213	0.00555652	0.00235318	0.000510953	0.00802517	0.0149132	0.0179338	0.00570714	0.0198219	0.0125904	0.0211828	0.0173387	0.0118168	0.006542	0.0128365	0.0111366	0.0158267	0.00796434	0.0172325	0.0136995	0.0162614	0.00936686	0.0282847	CDC42BPG
1721	7.56675e-11	2.04656e-10	0.0280785	0.00280294	0.00310662	0.00416244	0.0134306	0.0163365	0.00434168	0.00495134	0.0418124	0.0154077	0.0318061	0.0223234	0.00322028	0.00180824	0.0280785	0.0026468	0.0018326	0.00156401	0.00236135	0.00286815	0.00198395	0.00141166	0.00464772	0.00175837	0.00158526	0.00171614	0.00175148	0.00176297	0.00269196	0.00175739	0.00180965	PM20D1
1735	1.4245e-22	5.50719e-22	0.0106003	0.0074564	0.00555971	0.0077483	0.00441604	0.00770053	0.00264106	0.0103606	0.00112818	0.00499218	0.0029108	0.00214079	0.0103311	0.00723584	0.0164625	0.00164449	0.00448971	0.00619913	0.00906578	0.00782482	0.00822984	0.0108922	0.00897212	0.0106003	0.00447376	0.00842376	0.00364607	0.00736251	0.00917082	0.0101056	0.00656051	KLHDC7A
1750	2.8252e-28	1.27818e-27	0.0120275	0.00446891	0.00335008	0.0117084	0.0137309	0.0115284	0.0110178	0.010931	0.0123799	0.0161075	0.0202697	0.0142607	0.0114419	0.0113561	0.00932006	0.00503938	0.0104221	0.00419665	0.0102562	0.0120275	0.00715027	0.00737973	0.0128622	0.0113122	0.0111371	0.00868409	0.0133544	0.00427456	0.0110103	0.0111267	0.0118293	GLB1L2
1789	4.21092e-32	2.11956e-31	0.0167456	0.0115144	0.00872953	0.00531273	0.0129036	0.00856262	0.00901776	0.0126185	0.00116343	0.00399475	0.00754705	0.00642144	0.0131041	0.0107881	0.0148547	0.0068832	0.00774538	0.00605354	0.0124166	0.00529067	0.0147309	0.014115	0.00891762	0.0167456	0.00653277	0.00690868	0.00801671	0.00903274	0.0102402	0.0165294	0.0123562	VPS18
1803	2.48895e-28	1.1291e-27	0.0163991	0.00541401	0.00507821	0.0172965	0.00498999	0.00584054	0.0127196	0.00330408	0.0111016	0.00430647	0.004682	0.00101906	0.00244427	0.0129413	0.0074334	0.00717979	0.00938223	0.00508962	0.00916427	0.0163991	0.00735862	0.00159963	0.00442669	0.00736906	0.00774423	0.00417435	0.00972091	0.00676093	0.0131582	0.00730166	0.0213442	AGAP9
1845	3.81077e-21	1.41519e-20	0.024662	0.00621762	0.00452025	0.0178914	0.00189023	0.000694209	0.0205942	0.00402544	0.00669155	0.00517993	0.00425829	0.00438787	0.00256591	0.0213825	0.0121344	0.0073709	0.0220124	0.00893984	0.0196707	0.0121384	0.00933957	0.00599726	0.011238	0.0107142	0.0128015	0.0131036	0.0149372	0.00877329	0.0174878	0.00989714	0.024662	ALPK1
1859	3.01567e-41	1.90577e-40	0.0214683	0.00227381	0.00176238	0.00516991	0.00645022	0.00429041	0.00313254	0.00109365	0.0124314	0.00951557	0.0106366	0.00760861	0.00131056	0.0127759	0.000478916	0.000321761	0.0160773	0.00709594	0.0116502	0.0104207	0.00637669	0.00577929	0.00965396	0.00967114	0.00947065	0.0013179	0.015198	0.0103156	0.00549267	0.00902853	0.0214683	MBD1
1869	1.69777e-36	9.55364e-36	0.0322565	0.00360118	0.0040058	0.0143935	0.0146893	0.0123928	0.0135058	0.00932665	0.00848279	0.0218858	0.0204008	0.0233803	0.0183003	0.0169462	0.0164797	0.000958293	0.0144776	0.00987629	0.00562329	0.00750699	0.00541867	0.019959	0.0188317	0.0214595	0.010127	0.0100263	0.00740273	0.0118362	0.0163879	0.0228891	0.0322565	ZNF524
1920	4.53528e-19	1.58491e-18	0.00838754	0.00278108	0.00189917	0.00567695	0.00531323	0.00511589	0.00826228	0.00605855	0.00204427	0.00452886	0.0011067	0.0027681	0.00512646	0.00994771	0.00918184	0.00357261	0.0061414	0.00420302	0.00537259	0.00838754	0.000887577	0.00860118	0.0070008	0.00916063	0.00166058	0.00465594	0.00696102	0.00105963	0.00874292	0.00938243	0.00819764	AL591895.1
1923	1.01209e-31	5.02496e-31	0.0218031	0.00470491	0.00356847	0.015077	0.0247378	0.0273074	0.0105073	0.00485842	0.0566891	0.0199762	0.0450324	0.0290878	0.00917387	0.0218031	0.0128936	0.00309147	0.0131818	0.00149936	0.0150919	0.00356736	0.010094	0.00739699	0.0136785	0.015162	0.00399042	0.00541958	0.0118091	0.00912951	0.0119242	0.0149666	0.02061	APAF1
1930	1.84043e-27	8.13127e-27	0.0200081	0.00537796	0.00729472	0.0134461	0.0118821	0.00673042	0.01484	2.40855e-05	0.00765846	0.013358	0.01121	0.00882824	0.00940579	0.0200081	0.00854096	0.00781497	0.0235149	0.0106274	0.0162308	0.0113038	0.00472381	0.00548408	0.0163508	0.0160039	0.0164868	0.00354317	0.0241673	0.00986782	0.0114731	0.0149697	0.0240915	SBNO2
1938	2.68796e-23	1.0592e-22	0.0180194	0.00588939	0.00611019	0.0159535	0.00772121	0.00689313	0.00926703	0.00624558	0.00601149	0.00931061	0.0115077	0.0102541	0.00640958	0.0125258	0.00333021	0.00596757	0.0176952	0.0103985	0.0103729	0.00834474	0.00681239	0.00430782	0.00960821	0.00942806	0.0142266	0.00626919	0.0155871	0.00869072	0.00967651	0.00971065	0.0180194	ZDHHC11
2002	5.37007e-20	1.9289e-19	0.0133549	0.00527737	0.00282619	0.00421718	0.00265867	0.00288042	0.00968739	0.00412665	0.00559235	0.00225336	0.000649638	0.000586734	0.00442045	0.0122986	0.00854262	0.00589225	0.00879299	0.00454569	0.00801639	0.00742168	0.00657538	0.0066109	0.0071168	0.00871471	0.0044585	0.00640211	0.00400049	0.0048417	0.00708243	0.00779453	0.0133549	SCX
2038	1.10838e-44	7.55699e-44	0.0261096	0.00529538	0.00353449	0.0174041	0.00264594	0.00339253	0.00477328	0.00110015	0.0137708	0.00514603	0.00735068	0.00236797	0.00581186	0.0234689	0.0143469	0.00659901	0.00742199	0.0100315	0.0172053	0.0164237	0.00920135	0.000934981	0.0122909	0.0150921	0.0112265	0.00252074	0.0179364	0.0129899	0.00948291	0.0147623	0.0261096	RALGAPB
2051	2.27897e-24	9.23874e-24	0.0241669	0.00337587	0.00365715	0.00470979	0.0134685	0.0135066	0.00205999	0.00758097	0.00571352	0.0145457	0.0070497	0.0110315	0.00331367	0.0215444	0.00306894	0.00619624	0.0135442	0.00565495	0.0120961	0.00623861	0.0029523	0.0054539	0.0147852	0.0158967	0.00322393	0.000203705	0.0136703	0.00587003	0.00746348	0.017395	0.0241669	PDPK1
2061	1.81084e-17	6.04116e-17	0.0281308	0.00747166	0.00511987	0.018476	0.0270388	0.0223601	0.0281308	0.00465545	0.00204896	0.0198345	0.00487447	0.0103145	0.00600686	0.0165876	0.0127875	0.00884329	0.0136378	0.0073737	0.0195981	0.00975957	0.00512959	0.00444209	0.00999549	0.0110974	0.000289949	0.00824321	0.00747767	0.00901113	0.0104971	0.0111896	0.0148807	AP000692.2
2064	9.76898e-20	3.48248e-19	0.0133921	0.00177509	0.00211299	0.00897287	0.0134491	0.0149314	0.00453249	0.00238575	0.0424715	0.00923272	0.0267533	0.0166416	0.00065218	0.0100394	0.00752845	0.00322271	0.0141213	0.00530661	0.00617267	0.00992678	0.00241144	0.000125245	0.00360944	0.00512634	0.0075397	0.00173311	0.00747231	0.00277328	0.00623483	0.0053541	0.0133921	KIAA0753
2090	2.92736e-23	1.15164e-22	0.011592	0.00259427	0.00218919	0.0130272	0.00494883	0.00805435	0.00752992	0.0031744	0.0109462	0.00564815	0.00315598	0.00133354	0.00859585	0.0126258	0.0117141	0.00517882	0.00635834	0.00166103	0.00898194	0.0099069	0.00456231	0.00450775	0.00908911	0.0114297	0.00433255	0.00566983	0.00132843	0.00349543	0.011592	0.0115675	0.00995633	TJP2
2098	1.96681e-13	5.78418e-13	0.00573536	0.00343246	0.00240443	0.00669128	0.00434717	0.0031402	0.0068829	0.00406584	0.00568934	0.00273303	0.000833132	0.0012896	0.00419839	0.00651029	0.00511876	0.00364158	0.00430369	0.00330918	0.00677737	0.00573536	0.00417837	0.00304404	0.00441716	0.00530742	0.00297675	0.00223846	0.00542004	0.00419617	0.00589238	0.0051666	0.00912596	EME2
2117	6.19441e-17	2.03157e-16	0.01111	0.00589712	0.00551396	0.00690852	0.00682283	0.00625123	0.0062774	0.00684802	0.00570616	0.00742209	0.0114308	0.00813851	0.00697708	0.0035066	0.00492611	0.00555817	0.0108508	0.00454698	0.00806113	0.00458211	0.00516796	0.00706443	0.0073397	0.00862994	0.0074991	0.00489997	0.0111392	0.00568322	0.00841497	0.00890593	0.01111	ZMYND15
2119	1.43861e-44	9.77075e-44	0.0288215	0.00490796	0.0048144	0.0125305	0.0112031	0.01496	0.00842916	0.00123868	0.027244	0.00333232	0.0174622	0.0062905	0.00447895	0.0214677	0.015722	0.00480087	0.0220743	0.00851562	0.0140484	0.011652	0.00835474	0.00562332	0.00774977	0.0127642	0.00666412	0.00484578	0.0185891	0.0114853	0.0108984	0.0111636	0.0288215	MCM3AP
2148	2.30855e-32	1.17185e-31	0.0250167	0.00614847	0.00526402	0.0116523	0.00567729	0.00776909	0.0047273	0.000543756	0.0233601	0.00822806	0.00598537	0.00603694	0.00277332	0.0172434	0.0130613	0.00759646	0.0143426	0.00678867	0.0143844	0.0152252	0.00701548	0.00295104	0.00643332	0.0121454	0.0117819	0.00381548	0.0162751	0.010024	0.0075979	0.0104318	0.0250167	FAM193A
2173	2.27974e-28	1.03517e-27	0.0153137	0.0058112	0.00539351	0.00545546	0.0126595	0.00736159	0.00797302	0.00376624	0.0168604	0.014325	0.00718033	0.0151292	0.0024556	0.00288076	0.00921135	0.00447827	0.0107491	0.00659324	0.00999816	0.00636837	0.00750471	0.00549813	0.00471593	0.00625598	0.0114959	0.00313947	0.00570636	0.00703487	0.00722128	0.00633384	0.0153137	SH3BP5L
2204	6.57001e-32	3.28579e-31	0.0235423	0.00711321	0.00572244	0.0142714	0.0107699	0.00820845	0.0133622	0.00265437	0.0347016	0.0108774	0.0167027	0.0117154	0.00439345	0.0148751	0.00436641	0.00693429	0.00794547	0.00437267	0.0187832	0.0156694	0.0108485	0.0037074	0.0113733	0.00950991	0.0078056	0.00609051	0.00720503	0.00884441	0.0118249	0.010085	0.0235423	MYO18A
2212	1.00845e-29	4.7562e-29	0.0213113	0.00701649	0.00578849	0.00842175	0.0125454	0.0120816	0.0109667	0.00445966	0.0318839	0.0152603	0.0194903	0.0172207	0.00912679	0.0142283	0.0117009	0.0070326	0.0103783	0.00749004	0.0161638	0.0121715	0.00881374	0.007275	0.0090908	0.0135313	0.00859392	0.00486906	0.009081	0.00764008	0.00676679	0.013176	0.0213113	REXO1
2224	2.79298e-15	8.71197e-15	0.0126696	0.00232241	0.00249552	0.00513227	0.00351988	0.00233379	0.00537999	0.00127348	0.00166331	0.0070757	0.00723218	0.00429497	0.00256412	0.00888044	0.00160209	0.00330598	0.00746487	0.00373782	0.0116079	0.00656259	0.00104829	0.00286321	0.00677798	0.0101854	0.00629859	0.000708441	0.00815885	0.0046226	0.0058974	0.0106926	0.0126696	COQ8B
2230	1.26273e-17	4.22397e-17	0.00689203	0.00650482	0.00441905	0.0037019	0.00275891	0.0031295	0.00286057	0.00636014	0.00160505	0.00253257	0.000804214	0.000568892	0.0081386	0.00529956	0.0065427	0.00151213	0.00169036	0.00429071	0.00262587	0.00573744	0.0070212	0.00853071	0.00719307	0.00677619	0.00273807	0.00418857	0.00102641	0.00571235	0.00689203	0.00694539	0.00438244	AK8
2234	1.58484e-15	4.98336e-15	0.00747493	0.00698792	0.00445843	0.00541482	0.0140048	0.00887878	0.00602699	0.00224272	0.00481208	0.0115089	0.00862624	0.00853023	0.0056528	0.00579365	0.0106781	0.00478206	0.00784909	0.00497074	0.00807646	0.00534897	0.00610281	0.00485629	0.00406086	0.00747493	0.00251394	0.00216672	0.00103973	0.0052818	0.00476211	0.00650543	0.00559452	FOXO4
2253	1.131e-41	7.21954e-41	0.020843	0.00923686	0.00586632	0.0132291	0.00702277	0.012231	0.00691555	0.00145667	0.0113552	0.0109109	0.0130977	0.00884583	0.00737642	0.0146618	0.0166561	0.00614475	0.00648113	0.00382679	0.0153928	0.011655	0.00914828	0.0102642	0.00920701	0.0109268	0.00713837	0.004104	0.00946128	0.00797646	0.00559586	0.0124932	0.020843	RIPK1
2298	8.10415e-07	1.93491e-06	0.00649075	0.00388031	0.00356622	0.00675407	0.0107151	0.00933503	0.00804179	0.00214281	0.0062861	0.00764332	0.00320043	0.00445027	0.00262911	0.00612703	0.00221103	0.00356863	0.00727066	0.00265524	0.00566884	0.00496311	0.00373547	0.00210932	0.00425227	0.00266368	0.00444729	0.00463122	0.0111405	0.00356974	0.00288531	0.00258569	0.00649075	HIST1H4A
2305	4.1302e-07	9.94104e-07	0.0013217	0.00312892	0.00315872	0.0033192	0.0112925	0.0102965	0.00164708	0.00109025	0.0226772	0.0107667	0.0177604	0.0137692	0.000415493	0.00481343	0.00307907	0.00325653	0.00381389	0.000543755	0.00427979	0.00326667	0.00306663	0.000423779	0.00226126	0.0027121	0.00109793	0.000383359	0.00362369	0.00173263	0.000182462	0.00218974	0.0013217	AP001462.1
2330	2.82549e-19	9.93305e-19	0.0120713	0.00402993	0.00336561	0.0132557	0.00348943	0.00662551	0.00775764	0.00240756	0.00708872	0.00421702	0.00513835	0.00462564	0.00205132	0.0096007	0.00676735	0.00448625	0.00563826	0.00231489	0.00733909	0.0120713	0.00556233	0.00131339	0.00472354	0.00377796	0.00542467	0.0046268	0.00404395	0.00408126	0.0086342	0.00415119	0.0121967	CYP2C19
2359	3.09324e-19	1.08641e-18	0.0118422	0.00487986	0.00197534	0.00967859	0.0103312	0.0147825	0.00858354	0.0072159	0.0160647	0.00919915	0.0151512	0.0119481	0.00866348	0.0116068	0.00733658	0.00185561	0.00367562	0.00146006	0.0114548	0.00707845	0.00766407	0.00780006	0.00768528	0.0112736	0.00179071	0.00427481	0.00133958	0.00355332	0.00825547	0.0103478	0.0118422	AREL1
2419	5.72144e-13	1.65633e-12	0.00685726	0.00469387	0.0044676	0.00534136	0.00704066	0.00688599	0.00255446	0.00608262	0.0100417	0.00579838	0.00979571	0.00755603	7.0636e-05	0.00653877	0.00938186	0.00154741	0.00470979	0.00479272	0.00108036	0.00517165	0.0036411	0.00408768	0.00643593	0.00626103	0.00637265	0.0009272	0.00499074	0.00416701	0.00099585	0.00615651	0.00685726	SNTA1
2435	2.36012e-24	9.5631e-24	0.0147614	0.00575556	0.0046112	0.00716542	0.00542537	0.00598827	0.00956773	0.00413958	0.0194195	0.00184372	0.0113011	0.00565547	0.00328231	0.0138847	0.00911287	0.00421191	0.00940198	0.00348681	0.0113225	0.00529899	0.00743389	0.00516321	0.00308164	0.00848025	0.0098966	0.00595842	0.00315372	0.0066015	0.00781967	0.00801041	0.0147614	USF1
2479	1.71593e-11	4.74433e-11	0.0101452	0.00314078	0.00315194	0.00754711	0.0033044	0.00401325	0.00630318	0.000778314	0.00942857	0.00246551	0.00103656	0.00142088	0.000776462	0.00491659	0.00388512	0.00341818	0.00597505	0.00237182	0.00662683	0.00426811	0.00331096	0.000564692	0.00196281	0.00241947	0.00116029	0.00169614	0.00331938	0.00209438	0.00352039	0.00172261	0.0101452	AL137077.2
2534	1.33804e-12	3.83286e-12	0.00526806	0.00426005	0.00359997	0.00522517	0.00140316	0.00102447	0.0051139	0.00260183	0.00781157	0.00101748	0.000419106	0.000570789	0.0027306	0.00531362	0.00400547	0.00178304	0.00337563	0.00255374	0.00540109	0.00526806	0.0043073	0.00434184	0.0023394	0.00445833	0.00263121	0.00422578	0.00217906	0.00326591	0.00505575	0.00413616	0.00534576	WSCD2
2556	7.37432e-29	3.40005e-28	0.0160394	0.0070861	0.00605837	0.0117147	0.0105858	0.00891432	0.0136811	0.00516831	0.00826931	0.0127489	0.0106584	0.00972427	0.00278925	0.0133196	0.0105359	0.00658466	0.0107551	0.00420562	0.0113213	0.0068822	0.00707119	0.00643948	0.00528555	0.0114023	0.00674602	0.00641383	0.0126168	0.00644543	0.00956218	0.0111562	0.0160394	ENGASE
2651	1.01587e-32	5.20553e-32	0.019318	0.00746453	0.00631788	0.00683384	0.00648055	0.00495237	0.0142691	0.00622032	0.0130061	0.00503309	0.00174513	0.0032899	0.00776077	0.0101756	0.00950483	0.004277	0.0127321	0.00293342	0.0152691	0.00860406	0.00823732	0.00576445	0.00846415	0.00897545	0.00966149	0.0075088	0.00890622	0.0074937	0.00843961	0.00831966	0.019318	C7orf43
2653	2.17999e-18	7.46047e-18	0.0117829	0.00262482	0.000657842	0.0086655	0.000625395	0.00464859	0.00324593	0.0014068	0.0109772	0.00297112	0.00133683	0.00252281	0.00103187	0.012213	0.0133624	0.00204506	0.00470542	0.00245923	0.00392304	0.0117829	0.00441432	0.000693797	0.0046962	0.00848107	0.00107009	0.00116792	0.00920437	0.00441708	0.00193496	0.00527829	0.0131415	TRIM41
2658	2.87617e-07	6.9657e-07	0.00439074	0.00124901	0.00155856	0.00400416	0.00571248	0.00316803	0.00343919	0.00167711	0.0152891	0.00655792	0.0119119	0.00862967	0.00132525	0.00261885	0.00403146	0.00208703	0.00308463	0.000943123	0.00293822	0.00439074	0.00191185	0.00100037	0.00233242	0.00164746	0.00152752	0.00176803	0.000918736	0.00151126	0.0027087	0.00152619	0.00275469	UGT1A6
2660	6.92534e-10	1.81952e-09	0.00499818	0.00284656	0.00198499	0.00589757	0.00185119	0.00207884	0.00338411	0.00248728	0.00210552	0.00175036	0.000554238	0.00077068	0.00238457	0.00457207	0.00508516	0.00274399	0.00353602	0.00167241	0.0028882	0.00499818	0.00345945	0.00214768	0.00273937	0.00306976	0.00232122	0.00212667	0.00261121	0.00188888	0.00443079	0.0037534	0.00549817	SLC26A5
2668	1.06403e-32	5.44901e-32	0.0244317	0.00507329	0.00498456	0.0114164	0.0119155	0.0124424	0.0149231	0.00180276	0.0209712	0.0149481	0.0144171	0.0165416	0.00660115	0.0195116	0.00753889	0.0053775	0.0137976	0.00641853	0.0153882	0.013457	0.00899798	0.0042144	0.0122041	0.0153466	0.0125259	0.00663383	0.0214212	0.00980879	0.00536229	0.0146164	0.0244317	USP25
2727	2.06517e-15	6.47186e-15	0.00742509	0.00355509	0.00271461	0.00267911	0.00367642	0.00302158	0.00305135	0.00023888	0.00744969	0.00488467	0.00772672	0.00345896	0.000582485	0.00742509	0.00462311	0.00336632	0.000439974	0.000806383	0.00472304	0.00487623	0.00470384	0.00499048	0.00346613	0.00576416	0.00113184	0.00245584	0.00158555	0.00319281	0.00316152	0.00548377	0.00763311	ZNF75D
2746	9.58415e-18	3.21562e-17	0.00699274	0.00573854	0.00472258	0.00668372	0.0062939	0.00252174	0.00616366	0.00516984	0.00066072	0.00743087	0.0108129	0.00866658	0.00270587	0.00303846	0.00918557	0.00248568	0.00483976	0.00469999	0.00484081	0.00699274	0.00532047	0.00682411	0.00548088	0.00619682	0.00600958	0.00544061	0.00313651	0.00606368	0.00612806	0.00582404	0.00668171	C1orf167
2756	0.00696357	0.0142683	0.00275552	0.000439634	0.000439351	0.00202866	0.000838268	0.0011781	0.00110993	0.000973693	0.000334118	0.000595707	0.000250181	0.000347883	0.000786485	0.0011048	0.00124586	0.000513427	0.00377197	0.00190332	0.00176247	0.00111646	0.000705797	5.75256e-05	0.000726179	0.00105606	0.00249775	0.000906023	0.00345013	0.00116217	0.0008978	0.00105167	0.00275552	LINC00332
2792	4.20851e-17	1.3884e-16	0.013372	0.00493915	0.00494267	0.00527289	0.00902717	0.0113212	0.00868921	0.00366725	0.0198314	0.00981787	0.00828177	0.00329799	0.00325453	0.013372	0.0106914	0.00383987	0.00924116	0.00680251	0.00972213	0.00864662	0.00558974	0.00341784	0.00570054	0.00938003	0.00792727	0.00393588	0.00719159	0.00702917	0.00248154	0.00812502	0.0106823	ZNF266
2825	8.69059e-06	2.00251e-05	0.00504016	0.00192693	0.00211673	0.00339918	0.00178972	0.00171003	0.00211445	0.00174086	0.00118888	0.00200818	0.00276707	0.00236724	0.00155839	0.0014273	0.00771196	0.00187041	0.00564564	0.00459708	0.00251119	0.00326714	0.00157128	0.000283663	0.00438026	0.00100219	0.00110727	0.00186847	0.00494681	0.00242893	0.0025224	0.000968716	0.00504016	PLA2G2F
2843	5.79447e-17	1.90226e-16	0.00699728	0.00194987	0.00164974	0.00436216	0.0022284	0.00158776	0.00469104	0.00398663	0.00170119	0.00344065	0.00549042	0.00395418	0.00175963	0.00703942	0.0056177	0.000369727	0.00445286	0.00275349	0.000808373	0.00699728	0.00187538	0.00104376	0.00339	0.00598498	0.00146975	0.00132939	0.00404688	0.00423459	0.003679	0.00602767	0.00783539	PLPP6
2857	2.54645e-08	6.37192e-08	0.00390001	0.00235756	0.00217274	0.00434226	0.00211963	0.00264465	0.0040767	0.00104644	0.000460176	0.0021692	0.00048939	0.00104866	0.00173324	0.00337613	0.00411792	0.00302083	0.00159872	0.00193791	0.0023508	0.00390001	0.00284752	0.00122548	0.00256989	0.00338344	0.00241051	0.00109316	0.001097	0.0024873	0.00386565	0.00381011	0.00432661	AC022613.2
2858	6.5517e-11	1.77603e-10	0.00424644	0.00198263	0.00153146	0.00432608	0.00447114	0.005	0.00465349	0.00360164	0.00214678	0.00572677	0.00146313	0.00489594	0.00347281	0.00434077	0.00315989	0.00265131	0.00275922	0.00338998	0.00297386	0.00424644	0.00162664	0.00273653	0.00411429	0.00380211	0.000532859	0.00315216	0.00225094	0.00336041	0.00393966	0.00331797	0.00410106	AC008870.3
2904	4.27694e-22	1.63074e-21	0.0113249	0.0028923	0.00211028	0.00796964	0.0110888	0.0128028	0.00380787	0.00499493	0.0266667	0.0136178	0.0148935	0.0154877	0.00556397	0.0113249	0.00734584	0.00366115	0.00836516	0.00444529	0.00565769	0.00411205	0.00328788	0.00316114	0.00341359	0.00828949	0.00363504	0.00235047	0.00923573	0.00524503	0.00462218	0.00842119	0.0118346	SMCR8
2928	2.07495e-15	6.50128e-15	0.00926644	0.00477627	0.0029461	0.00706782	0.00965754	0.00917626	0.00848266	0.003165	0.0084659	0.00924964	0.00775158	0.00925216	0.00445491	0.00675597	0.0106874	0.000884562	0.0056395	0.00309857	0.00908781	0.00422303	0.00572848	0.0047307	0.00445707	0.00519311	0.00503414	0.00540701	0.004928	0.00402317	0.00393862	0.00502016	0.00926644	SLC29A3
2947	7.2376e-08	1.78692e-07	0.00673459	0.00196841	0.00183462	0.00686539	0.00130726	0.000982254	0.00474601	0.00326287	0.0208818	0.00650688	0.0142794	0.010196	0.00281394	0.00739281	0.00374455	0.00175516	0.00345389	0.00123518	0.00494438	0.00673459	0.0024022	0.0004812	0.00571646	0.00329523	0.00212026	0.00313416	0.00330382	0.00203023	0.00423735	0.00310608	0.00478295	UGT1A7
3014	6.04701e-21	2.2323e-20	0.0135532	0.000695517	0.000733921	0.00581093	0.00334984	0.00383998	0.00758486	0.00304007	0.00342424	0.00544478	0.00789178	0.00469422	0.00577132	0.0105293	0.0115431	0.00133095	0.0034521	0.000989984	0.0129347	0.00856793	0.00257617	0.00221186	0.00561181	0.00682097	0.00040359	0.00376059	0.00596632	0.0032138	0.00623429	0.00595009	0.0135532	TMEM62
3148	3.19425e-08	7.96853e-08	0.0085434	0.0029514	0.00280014	0.00915418	0.00299127	0.00476542	0.00857797	0.00290647	0.0060729	0.00222665	0.000892745	0.00124138	0.00332246	0.0069853	0.0089377	0.0032099	0.0062963	0.00365085	0.0108688	0.00693568	0.00376236	0.00104728	0.00285443	0.00397484	0.00348403	0.0037563	0.00600492	0.00312981	0.00588843	0.00405542	0.0085434	AC138819.1
3198	6.75685e-10	1.77609e-09	0.00731049	0.00319819	0.00249804	0.00525313	0.00490043	0.00493998	0.00812516	0.00100056	0.00795545	0.00483749	0.0015376	0.0039502	0.0011447	0.00439234	0.00697291	0.00243248	0.00578239	0.00173336	0.00496606	0.00731049	0.00328292	0.000547845	0.00373063	0.00228354	0.00160387	0.00268112	0.00487216	0.00239845	0.00537806	0.00160305	0.00830656	ANKFN1
3256	8.41428e-09	2.13286e-08	0.00596036	0.00407791	0.00356951	0.00544735	0.00798814	0.00895237	0.00466319	0.0038829	0.00694422	0.0101476	0.0161307	0.0131261	0.00128747	0.0058307	0.00626343	0.00347842	0.00502157	0.00348436	0.00671537	0.00596681	0.00384014	0.00417916	0.00308178	0.00548553	0.00191739	0.00393295	0.00177748	0.00331058	0.00488568	0.0056556	0.00596036	MYOM1
3273	1.0192e-10	2.74596e-10	0.00740576	0.000534179	0.000427981	0.00126266	0.00231466	0.000990596	0.00130886	0.000584934	0.0032848	0.00203628	0.00119613	0.00186065	0.000154137	0.0049471	0.000793951	0.000621252	0.00276337	0.00179174	0.00390225	0.0028528	0.00166277	0.000914394	0.00160263	0.00296794	0.0024862	0.000248332	0.00371692	0.00230299	0.00227612	0.00305823	0.00740576	TCEANC2
3276	3.82949e-08	9.53054e-08	0.00304859	0.00294301	0.000402092	0.00331103	0.00111014	0.0010093	0.000461951	0.00388859	0.00174439	0.00076682	0.000335443	0.000307308	0.0042635	0.00326469	0.00396439	0.00030671	0.000357493	0.00305118	0.000432829	0.00283096	0.00401266	0.00330912	0.00304859	0.00410026	0.00181407	0.00177625	0.000783943	0.00311581	0.00379849	0.00386082	0.00289409	AC105277.1
3340	9.89297e-08	2.43017e-07	0.00434268	0.002413	0.00194804	0.00158863	0.00165766	0.000508959	0.00122932	0.00293296	0.000367663	0.0017296	0.000478247	0.000665581	0.00326514	0.00286971	0.00305945	0.00284973	0.00197306	0.00126554	0.0020885	0.00274456	0.00272322	0.00437319	0.0028102	0.00434268	0.00247379	0.00226193	0.00194609	0.00292502	0.00344091	0.00387001	0.0030858	AL078459.1
3350	1.52525e-07	3.72462e-07	0.00574128	0.00131181	0.00141912	0.0025726	0.00145046	0.00181325	0.000892867	0.00100724	0.00361336	0.00115426	0.000432889	0.000513744	0.000923147	0.00215511	0.00253429	0.000988954	0.00575624	0.00247389	0.00340661	0.002397	0.00194874	0.0010539	0.00153798	0.00154133	0.00427818	0.00204573	0.00509398	0.00177665	0.00290281	0.00148106	0.00574128	DNAH8
3358	7.51109e-06	1.73501e-05	0.00361944	0.00200101	0.00174794	0.00279706	0.000233445	0.00107266	0.00196675	0.00182945	0.00414581	0.000734948	0.000296824	0.000412741	0.00280792	0.0025072	0.00102193	0.00207622	0.0008972	0.000356247	0.00211895	0.00361944	0.00239479	0.00260771	0.00227703	0.00238048	0.00216532	0.00267433	0.00271592	0.00237729	0.00292819	0.00262659	0.00334619	HIST1H3F
3390	3.40059e-09	8.73271e-09	0.00670072	0.000767272	0.00138038	0.00118303	0.000694497	0.00129626	0.00259275	0.000718057	0.00190319	0.00131553	0.000703734	0.00090839	0.00154854	0.00387968	0.00491438	0.00238052	0.00674175	0.00305531	0.00285184	0.00432821	0.00133236	0.0011278	0.00343004	0.00258027	0.00162577	0.00157886	0.00367472	0.00259206	0.00148307	0.00257213	0.00670072	ZNF587B
3405	2.94054e-11	8.06442e-11	0.00567366	8.92266e-05	0.000613194	0.00556684	0.00178156	0.00205936	0.00178463	0.00138846	0.00362003	0.0042197	0.00555872	0.0052865	0.00315151	0.00392771	0.00170223	0.00113091	0.00432419	0.00344451	0.00448717	0.00567366	0.000875425	0.00183106	0.0039721	0.00394784	0.00345774	0.00275937	0.00675672	0.00290408	0.00522069	0.00423015	0.00512284	MPP3
3443	5.94196e-06	1.37768e-05	0.00538103	0.00274595	0.00158044	0.00414578	0.00415306	0.00283113	0.00575806	0.00151458	0.0145141	0.00315621	0.0015793	0.00210221	0.00131762	0.00309958	0.00246718	0.00158473	0.00311604	0.00144724	0.00900157	0.00104484	0.00261476	0.00129475	0.00394426	0.00236024	0.00235232	0.00383028	0.00251564	0.00180902	0.00355845	0.00207673	0.00538103	AATBC
3474	4.31825e-07	1.03884e-06	0.00413686	0.00398985	0.0031953	0.00544793	0.00627367	0.00567735	0.00562893	0.00298727	0.00364355	0.00473376	0.0019363	0.00269246	0.00258956	0.00387882	0.0054358	0.00245145	0.00234583	0.00220111	0.00712528	0.00280121	0.00359704	0.00320424	0.00189742	0.00367272	0.00197186	0.00125247	0.000159247	0.00238637	0.00413686	0.00371052	0.00388202	MROH7
3478	1.91752e-06	4.52154e-06	0.00611845	0.00129363	0.00137754	0.00320964	0.000423678	0.00111892	0.00239714	0.00028014	0.0104715	0.000627966	0.000254391	0.000328894	0.000197606	0.00278272	0.00206716	0.00170091	0.00508072	0.00210554	0.00602189	0.0038876	0.0021584	3.17975e-05	0.00151082	0.00145712	0.00302739	0.00196137	0.00457958	0.00166077	0.00346583	0.00148125	0.00611845	AC093525.7
3521	6.41386e-09	1.63171e-08	0.00964474	0.0013587	0.00228119	0.0087483	0.00290059	0.00256982	0.00495812	0.000539099	0.0110615	0.0023321	0.000983454	0.00136751	0.00201003	0.00575534	0.00173493	0.00273947	0.00480005	0.0013672	0.00591402	0.00741387	0.00266673	0.00125515	0.00305259	0.00432497	0.00120016	0.00288546	0.00302113	0.000752557	0.00602373	0.00418171	0.00964474	AC011447.3
3563	4.28381e-05	9.63132e-05	0.00324226	0.000884004	0.000833481	0.0033647	0.00108118	0.000667855	0.0026999	0.000525502	0.00701821	0.000790153	0.000322677	0.000448689	0.00063091	0.00262909	0.00161189	0.000226168	0.00366686	0.00102912	0.00187959	0.00324226	0.0016851	0.000839467	0.00142622	0.00142702	0.00174515	0.00166765	0.00286546	0.000865936	0.00320246	0.00135399	0.00280272	AC103923.1
3738	1.0481e-07	2.57312e-07	0.00340549	0.0034757	0.00308145	0.00193703	0.000763611	0.000840309	0.0017094	0.00329163	0.00184047	0.000542653	0.0002279	0.000311664	0.00319948	0.00257497	0.00295017	0.00244292	0.00282534	0.00332465	0.00352131	0.00340549	0.00382859	0.00436662	0.00400214	0.00357485	0.00453234	0.00385622	0.00265085	0.00425936	0.00342026	0.00279103	0.00361784	MYPN
3747	0.001298	0.00275278	0.00206965	0.000971076	0.000918296	0.00133565	0.00208018	0.00186168	0.000760511	0.00182179	0.000295221	0.00165478	0.000259813	0.000351768	0.000809399	0.00253262	0.00164499	0.000604634	0.00427088	0.000954251	0.00103826	0.00222418	0.00151573	0.00212428	0.0021876	0.00176439	0.00204393	0.00105567	0.00888428	0.00147335	0.00198097	0.00159884	0.00206965	TBC1D3L
3755	3.85155e-10	1.01984e-09	0.00548452	0.00305235	0.00256637	0.00597464	0.00346129	0.00350925	0.0053521	0.0036413	0.00556611	0.00300486	0.00389932	0.00299346	0.00364236	0.00444727	0.00395407	0.00210204	0.0010163	0.00207772	0.00410763	0.00548452	0.00352762	0.00252584	0.00427584	0.00368916	0.00112786	0.00108553	0.000324275	0.00246325	0.00448646	0.00391219	0.00399116	WFIKKN1
3773	0.000130901	0.000288939	0.00320455	0.00147584	0.00110174	0.00310636	0.00178072	0.00205959	0.00246126	0.000815895	0.00280503	0.00123519	0.000531456	0.000683815	0.00108215	0.00330872	0.00121713	0.00140845	0.00307878	0.0005151	0.0024782	0.00320455	0.00168948	0.000846893	0.00239217	0.00203321	0.00280122	0.00214597	0.00279397	0.00259027	0.00239136	0.00190598	0.00333463	AC006483.2
3839	0.00617936	0.012691	0.00517558	0.000327759	0.000345106	0.0012733	0.00693686	0.0098083	0.00036689	0.001512	0.0255657	0.00338073	0.0136903	0.00517558	0.00101077	0.00211942	0.000415995	0.000473622	0.00102497	0.000413297	0.000798494	0.001415	0.000313272	0.000313264	0.00122203	0.00115815	0.000920218	0.000498631	0.000691099	0.000947048	0.000833869	0.00111581	0.000796295	RNF224
3972	8.63566e-10	2.26162e-09	0.00909791	0.00272506	0.00205086	0.00991487	0.00112204	0.00217646	0.00208329	0.00143025	0.00632436	0.000715831	0.000347767	0.000483578	0.00220449	0.00657866	0.0028324	0.00221559	0.00432672	0.00151913	0.00365115	0.00633872	0.00339602	0.00152819	0.00191979	0.00278187	0.000622222	0.00267519	0.00265672	0.00257056	0.00577588	0.00281734	0.00909791	MAFA
4097	1.97158e-16	6.36899e-16	0.0107237	0.0023156	0.00162856	0.00898951	0.00303586	0.00335726	0.000173417	0.00313865	0.00423791	0.00288635	0.00151601	0.00176808	0.00281888	0.00822743	0.00395953	0.00160411	0.00643643	0.00117486	0.00342829	0.00697672	0.0013356	0.0020868	0.00487064	0.00499028	0.00391849	0.00118609	0.00309327	0.00293951	0.00690167	0.00443587	0.0107237	ABCC6
4124	1.19763e-06	2.84342e-06	0.00810837	0.00249716	0.00244581	0.00590468	0.00174269	0.00274712	0.00509493	0.00150466	0.0128053	0.00129896	0.000520107	0.00072322	0.0012606	0.00393543	0.00414527	0.00254587	0.00917822	0.00294367	0.00994469	0.00470676	0.00302209	0.000608365	0.00330373	0.0023447	0.00530419	0.00364426	0.00502859	0.00208016	0.00432515	0.00218238	0.00810837	AC024267.1
4188	0.000110761	0.000245261	0.00235614	0.0016145	0.000797843	0.00110126	0.00124568	0.000502259	0.00380208	0.00174531	0.000749834	0.00159117	0.00230898	0.00216341	0.00078489	0.00235614	0.00494419	0.00125528	0.00348142	0.00110255	0.0030719	0.00117562	0.00175906	0.00108529	0.00123002	0.00257644	0.000201963	0.00223111	0.00317237	0.00141597	0.00084969	0.00272977	0.00081967	AP002807.1
4362	5.34599e-12	1.50225e-11	0.00716215	0.000393767	0.000356776	0.0037118	0.00768623	0.00988348	0.00203382	0.000831087	0.0203163	0.0109042	0.0213051	0.0132811	7.80709e-05	0.00361707	0.00157062	0.00189977	0.00442894	0.00183094	0.00273365	0.00441866	0.00199417	0.00143563	0.000834784	0.00287571	0.00158137	0.000193961	0.00024719	0.00201088	0.00179057	0.00279062	0.00716215	TOP3B
4377	3.12586e-07	7.56167e-07	0.0046326	0.00169962	0.00134513	0.00256382	0.00282119	0.00221734	0.0026665	0.00152278	0.00388732	0.0037506	0.00437608	0.00418088	0.00116351	0.00292512	0.00130288	0.00229298	0.00269839	0.00148317	0.00296717	0.0046326	0.00172494	0.000176382	0.0025446	0.0016766	0.00240642	0.00110754	0.00386878	0.00247025	0.00283679	0.00156675	0.00502228	AC073957.3
4415	1.52904e-05	3.4935e-05	0.00498597	0.000669949	7.69593e-05	0.00417347	0.0087925	0.00505593	0.00159089	0.00241774	0.00711239	0.0128456	0.0240366	0.0160975	0.00169004	0.00228344	0.00255929	0.000788488	0.00656103	0.000772825	0.00484798	0.00437085	0.00133965	0.000528285	0.00272011	0.00166185	0.00359026	0.00207174	0.00433672	0.00172116	0.00326508	0.00144474	0.00498597	SLC4A11
4425	5.80304e-09	1.47912e-08	0.00509467	0.00305062	0.00190664	0.00462432	0.000460804	0.000372803	0.00517242	0.00213968	0.00377081	0.000328711	1.24606e-05	0.00016011	0.0025974	0.00417851	0.00489454	0.00242517	0.00159543	0.00192599	0.00254471	0.00374588	0.00318487	0.00428638	0.00174383	0.00511019	0.00120376	0.00362777	0.000805664	0.00218635	0.00509467	0.00546404	0.00362277	AC008397.2
4519	0.00192588	0.00404421	0.00214072	0.000659498	0.00066164	0.00288072	0.000739023	0.000695955	0.00200941	0.00128333	0.00153605	0.000586498	0.000228364	0.000317546	0.000883685	0.00211658	0.0018135	0.000391857	0.00138053	0.00126592	0.00227663	0.00228203	0.000528513	0.000197057	0.00153587	0.00187732	0.00158858	0.000520089	0.00110672	0.00136348	0.00205164	0.0019188	0.00214072	AL355073.2
4620	0.0015937	0.00336287	0.0030262	0.00106662	0.000932796	0.00217593	0.000433466	0.000432174	0.00133369	0.000966806	0.00300305	0.00030313	0.000129368	0.000179889	0.000282915	0.00145867	0.00298779	0.00104094	0.00256311	0.000730388	0.00196057	0.00163741	0.0012315	0.00049714	0.00115544	0.00131459	0.00130915	0.00123424	0.00313999	0.00114371	0.00194803	0.00117888	0.0030262	EHMT2-AS1
4861	0.00752462	0.0153897	0.00412469	0.00206084	0.00213267	0.00455419	0.00100046	0.00209263	0.00456322	0.00195746	0.00606213	0.000504288	2.12687e-05	8.95288e-05	0.00173286	0.00412469	0.00332861	0.00121987	0.000860638	0.00073016	0.0048867	0.00289327	0.00213492	0.00118974	0.00254936	0.0031667	0.000199994	0.00242501	0.000165341	0.00105551	0.00256589	0.00300105	0.00167738	ATP13A5
5139	0.00313577	0.00652525	0.00330497	0.00127848	0.000851941	0.0035257	0.00504668	0.00635215	0.00169821	0.00136302	0.0158813	0.00543794	0.0110956	0.00755979	0.000454839	0.00192106	0.000315068	0.00126477	0.00183575	2.38702e-06	0.00241536	0.00277409	0.00140842	0.000493705	0.00187268	0.00118927	2.61266e-05	0.000988108	0.00148254	0.00121346	0.00161252	0.00112178	0.00330497	AC083973.1
5149	0.013106	0.0264278	0.00197725	8.14694e-05	0.000597	0.00302052	0.000470477	0.000734998	0.00232825	0.000241942	0.00247026	0.00128215	0.00251659	0.00133127	0.00116598	0.00311738	0.00104374	0.000727452	0.000754875	0.00110478	0.00122175	0.00169959	0.000366595	0.000168391	0.000630636	0.000684204	0.000512508	0.000461019	0.00134455	0.00127229	0.00159151	0.00138151	0.00197725	AC073335.2
5358	0.00426049	0.00880776	0.00138215	0.000836228	0.000182015	0.00159427	0.00106614	0.00101924	0.00120743	0.00109559	0.000555638	0.000799739	0.000320402	0.000445525	0.000833334	0.00137476	0.000787737	0.000389103	0.00162726	0.00016151	0.000660175	0.00103561	0.0005493	0.000930491	0.00138215	0.00121262	0.000335958	0.0011627	0.00112027	0.000244627	0.00115938	0.0013136	0.00133693	TMPRSS7
5549	0.00111428	0.00237064	0.00388465	0.000672764	0.000366505	0.000574581	0.0011425	0.000913211	0.00388465	0.000351281	0.000218737	0.000811908	0.00034098	0.00047414	0.000160323	0.00065988	0.00167687	0.000439006	0.000634121	0.000249491	0.00162827	0.000392053	0.000821438	0.00028775	0.000339435	0.000352616	0.0003019	0.000392911	0.000516275	0.000170179	0.000603823	0.000306375	0.0010966	RIMS4
5738	0.00941081	0.0191563	0.00189716	0.0014032	0.00133534	0.00110045	0.000356613	0.000285044	0.00326784	0.00132875	0.00149557	0.000253423	0.000106431	2.58908e-05	0.00165034	0.00186643	0.00126933	0.00146389	0.0014813	0.00186259	0.00218146	0.00189716	0.00145671	0.000987614	0.00139198	0.00134254	0.00190599	0.0017317	0.00211108	0.00209239	0.00186346	0.00142455	0.00199833	AL357033.3
5808	0.000264434	0.00057742	0.00362284	0.00112362	0.000810261	0.00390939	0.000982437	0.00047317	0.000810848	0.0010244	4.37916e-05	0.000604676	0.000297343	0.000329128	0.000778475	0.00362284	0.00236507	0.00165532	0.00221863	0.000412991	0.00212572	0.00191684	0.00168023	0.00152074	0.00132748	0.00184797	0.00118479	0.000371068	0.00424616	0.000770826	0.00213974	0.00211379	0.00250659	AC080129.2
5877	0.0511549	0.0995725	0.000797196	0.000777411	0.000723264	0.000590288	0.00059009	0.000471663	0.000627772	0.000684504	0.000261482	0.000414529	0.000176113	0.000237022	0.000735405	0.00077638	0.000296562	5.31365e-05	0.00214641	0.000633555	0.000682289	0.000735446	0.000636335	0.000882892	0.000708615	0.000766352	0.00122046	0.000790547	0.00161583	0.000760984	0.000797196	0.000673702	0.00109559	INSL4

## Sheet: 5
Top	p.value	FDR	summary.logFC	logFC.1	logFC.2	logFC.3	logFC.4	logFC.6	logFC.7	logFC.8	logFC.9	logFC.10	logFC.11	logFC.12	logFC.13	logFC.14	logFC.15	logFC.16	logFC.17	logFC.18	logFC.19	logFC.20	logFC.21	logFC.22	logFC.23	logFC.24	logFC.25	logFC.26	logFC.27	logFC.28	logFC.29	logFC.30	logFC.31	GeneName
1	0	0	0.368346	0.310681	0.342722	0.289583	0.351945	0.132386	0.334153	0.383595	0.353943	0.133457	0.43758	0.368346	0.334147	0.193618	0.41221	0.342171		0.344425	0.329778	0.320612	0.311461		0.286392	0.250944	0.383279	0.302871		0.359037	0.329088	0.230899	0.383936	DAPL1
1	0	0	2.54572	2.09804	2.06189	2.53483	2.30605	1.41002	2.22804	2.38265	2.82608	0.355587	2.54572	2.06548	2.78492	2.70548	1.91878	2.03759		2.74013	2.30542	2.4067	2.25968		2.51093	2.8219	2.78	2.20277		2.80745	2.41826	2.67301	3.02737	FABP5
1	0	0	1.68714	1.69586	1.68932	1.31302	1.74359	1.08316	1.84367	1.66056	1.47241	0.0323275	1.68714	1.11457	1.7037	1.73455	1.97698	1.66677		1.79867	1.63089	1.64694	1.65476		1.72065	1.43569	1.88409	1.71621		1.86166	1.65786	1.36631	1.83011	LY6D
1	0	0	0.170266	0.1483	0.149532	0.170965	0.138066	0.0575634	0.113464	0.0269616	0.159486	0.119712	0.18418	0.170266	0.128824	0.134965	0.143719	0.159296		0.0945798	0.170115	0.150746	0.146512		0.129792	0.185296	0.098969	0.0730583		0.102125	0.155681	0.185275	0.163879	FAM213A
1	0	0	0.187091	0.168294	0.164693	0.155483	0.162974	0.014076	0.165308	0.161465	0.150169	0.0781794	0.16466	0.119953	0.167668	0.228786	0.186851	0.160937		0.180395	0.167476	0.190803	0.172274		0.192449	0.154659	0.176127	0.189138		0.185858	0.187091	0.177879	0.160583	DSC3
2	0	0	0.493153	0.509469	0.531952	0.507995	0.64654	0.220456	0.622653	0.486451	0.436643	0.279124	0.655143	0.493153	0.536096	0.669852	0.585758	0.656586		0.368269	0.711622	0.328556	0.600808		0.43629	0.679494	0.464135	0.589319		0.303668	0.380017	0.689788	0.653636	ENO1
2	0	0	1.811	2.36668	2.34783	2.32163	2.43457	0.536184	2.32858	2.30861	2.37278	0.0669577	1.811	1.27926	2.53808	2.97464	2.57852	2.36615		2.49357	2.42235	2.29794	2.38043		2.3192	2.68741	2.59258	2.39134		2.58912	2.23596	2.47728	2.14728	S100A2
2	0	0	0.174906	0.134566	0.156544	0.170588	0.156522	0.116539	0.155544	0.196727	0.190184	0.026723	0.174906	0.115417	0.205516	0.250961	0.15525	0.153853		0.159009	0.15253	0.174182	0.145287		0.184275	0.200645	0.19737	0.156335		0.16904	0.174051	0.188693	0.231585	NMU
2	0	0	1.0881	1.05793	1.07207	1.11839	1.05875	0.58951	1.04839	0.991133	0.690045	0.0801394	1.0881	0.648515	1.09166	1.16833	1.10647	1.0514		1.04756	0.959642	1.09668	1.05632		1.06205	0.992277	1.0717	1.02091		1.07542	1.01024	0.959828	1.06716	AQP3
2	0	0	1.70284	0.494523	0.395313	1.55082	0.82595	0.853914	1.68599	1.53281	1.02184	0.154592	1.70284	0.904189	1.28187	1.44926	1.66518	0.371657		0.703212	1.57457	1.38179	0.940977		1.51291	1.49429	1.15527	1.38532		0.852051	1.54593	1.46109	1.84034	GSTP1
2	0	0	1.54004	1.50322	1.45924	1.42796	1.37985	0.397932	1.37857	1.61812	1.54589	1.295	1.55456	1.54004	1.59512	1.69704	1.50539	1.46892		1.23402	1.60408	1.63884	1.55115		1.55485	1.57166	1.13955	1.52386		1.22632	1.51613	1.67978	1.48893	KRT5
2	0	0	0.152079	0.0565088	0.106281	0.0471534	0.177233	0.0390866	0.163092	0.0537323	0.0862357	0.0961045	0.182006	0.152079	0.121006	0.254231	0.153092	0.13653		0.086452	0.167004	0.080272	0.123998		0.101024	0.202201	0.0847946	0.10592		0.0286681	0.041465	0.21643	0.203487	SNRPB
2	0	0	0.408297	0.28069	0.284822	0.408205	0.279798	0.150043	0.235202	0.44142	0.489802	0.0013971	0.305071	0.258479	0.441942	0.373077	0.0702187	0.201127		0.528407	0.186804	0.360367	0.273728		0.408297	0.501501	0.610025	0.301346		0.56503	0.420208	0.410044	0.424977	LGALS7B
3	0	0	0.431888	0.317582	0.294278	0.718	0.639391	0.357086	0.743875	0.567982	0.512722	0.051699	0.717864	0.431888	0.507209	0.646774	0.418081	0.370962		0.470681	0.7629	0.556657	0.531993		0.539473	0.620286	0.616751	0.692575		0.549239	0.681225	0.623052	0.843039	PRDX1
3	0	0	0.934849	1.05562	1.05524	0.807869	1.12421	0.737801	1.15311	1.06708	0.959815	0.185856	1.15367	0.934849	0.990177	0.794784	1.22797	1.08114		1.28297	1.01078	0.949453	0.98636		1.02572	0.970361	1.28661	1.13955		1.30626	1.05378	0.883382	1.15632	CRABP2
3	0	0	0.221267	0.194074	0.167943	0.16314	0.16904	0.0931909	0.235847	0.17954	0.157128	0.0139081	0.221267	0.157539	0.162205	0.144906	0.219389	0.14127		0.215615	0.168243	0.195623	0.193469		0.205495	0.127483	0.201983	0.217625		0.211633	0.210964	0.1121	0.187212	ADH7
3	0	0	0.274543	0.198876	0.206619	0.189848	0.201029	0.0901125	0.214522	0.244053	0.209903	0.0257394	0.274543	0.200076	0.0791281	0.0919598	0.23773	0.212518		0.150987	0.15486	0.195421	0.190831		0.201407	0.117938	0.129607	0.175049		0.147766	0.214471	0.111009	0.202246	PTN
3	0	0	0.468174	0.33603	0.329325	0.361921	0.386477	0.0711483	0.255718	0.317523	0.204886	0.14357	0.468174	0.309195	0.366889	0.701272	0.238424	0.404428		0.295758	0.467466	0.116117	0.38235		0.324576	0.597334	0.408776	0.192816		0.323018	0.314281	0.627274	0.49943	PKM
3	0	0	0.18159	0.131357	0.137274	0.126363	0.140929	0.0726521	0.14504	0.137988	0.109008	0.0163029	0.18159	0.106837	0.133379	0.0425639	0.163101	0.137572		0.120258	0.128446	0.133715	0.134585		0.141458	0.0871252	0.12325	0.110467		0.121399	0.131048	0.0646465	0.124595	CAPNS2
[truncated: 453 more rows]

## Sheet: 6
Top	p.value	FDR	summary.logFC	logFC.1	logFC.2	logFC.3	logFC.4	logFC.5	logFC.7	logFC.8	logFC.9	logFC.10	logFC.11	logFC.12	logFC.13	logFC.14	logFC.15	logFC.16	logFC.17	logFC.18	logFC.19	logFC.20	logFC.21	logFC.22	logFC.23	logFC.24	logFC.25	logFC.26	logFC.27	logFC.28	logFC.29	logFC.30	logFC.31	GeneName
[truncated: 52 more rows]

[truncated: 25 more sheets: 7, 8, 9, 10, 11, 12, 13, 14, 15, 16, 17, 18, 19, 20, 21, 22, 23, 24, 25, 26 …]
