# Supplementary material for: Single-cell RNA sequencing unifies developmental programs of Esophageal and Gastric Intestinal Metaplasia
Source: Cancer Discov. Author manuscript; Available in PMC 2023 Jun 23. (PMC10236154; doi:10.1158/2159-8290.CD-22-0824)
Supplement: Table S5 [file EMS172799-supplement-Table_S5.xlsx]

## Sheet: 20230131_cluster_summary_cn
sample	cluster	major_cn	minor_cn	NumMutations	MeanVAF	ClusterClonalCellFraction
IM:LP6008269-DNA_A02	1	1	0	7	0.15	1
IM:LP6008269-DNA_A02	1	1	1	4901	0.15	1
IM:LP6008269-DNA_A02	1	2	0	37	0.12	1
IM:LP6008269-DNA_A04	1	2	0	6	0.38	1
IM:LP6008269-DNA_A04	1	2	1	8	0.29	1
IM:LP6008269-DNA_A04	1	2	2	6406	0.27	1
IM:LP6008269-DNA_A04	1	3	1	24	0.2	1
IM:LP6008269-DNA_A04	1	3	2	8	0.3	1
IM:LP6008269-DNA_A04	1	4	0	322	0.4	1
IM:LP6008269-DNA_A04	1	4	1	1	0.24	1
IM:LP6008269-DNA_D04	1	1	0	3	0.15	0.3
IM:LP6008269-DNA_D04	1	1	1	3242	0.09	0.3
IM:LP6008269-DNA_D04	1	2	0	68	0.1	0.3
IM:LP6008269-DNA_D04	1	2	1	1	0.05	0.3
IM:LP6008269-DNA_D04	2	1	0	1	0.34	1
IM:LP6008269-DNA_D04	2	1	1	1573	0.3	1
IM:LP6008269-DNA_D04	2	2	0	15	0.49	1
IM:LP6008269-DNA_F01	1	1	0	6	0.12	0.32
IM:LP6008269-DNA_F01	1	1	1	997	0.09	0.32
IM:LP6008269-DNA_F01	2	1	0	12	0.43	1
IM:LP6008269-DNA_F01	2	1	1	3176	0.29	1
IM:LP6008269-DNA_F01	2	2	1	5	0.23	1
IM:LP6008269-DNA_G01	1	1	0	51	0.1	0.43
IM:LP6008269-DNA_G01	1	1	1	4712	0.09	0.43
IM:LP6008269-DNA_G01	1	2	0	24	0.1	0.43
IM:LP6008269-DNA_G01	2	1	0	5	0.24	1
IM:LP6008269-DNA_G01	2	1	1	8878	0.22	1
IM:LP6008269-DNA_G01	2	2	0	12	0.22	1
IM:LP6008269-DNA_H01	1	1	0	1	0.1	0.52
IM:LP6008269-DNA_H01	1	1	1	655	0.07	0.52
IM:LP6008269-DNA_H01	1	2	0	8	0.09	0.52
IM:LP6008269-DNA_H01	2	1	0	2	0.14	1
IM:LP6008269-DNA_H01	2	1	1	806	0.15	1
IM:LP6008269-DNA_H03	1	1	0	3	0.11	0.3
IM:LP6008269-DNA_H03	1	1	1	8468	0.1	0.3
IM:LP6008269-DNA_H03	1	2	0	120	0.1	0.3
IM:LP6008269-DNA_H03	1	2	1	3	0.05	0.3
IM:LP6008269-DNA_H03	2	1	1	2825	0.32	1
IM:LP6008269-DNA_H03	2	2	0	25	0.64	1
IM:LP6008269-DNA_H03	2	2	1	2	0.27	1
IM:LP6008280-DNA_A05	1	2	0	100	0.38	1
IM:LP6008280-DNA_A05	1	2	1	12	0.23	1
IM:LP6008280-DNA_A05	1	2	2	5824	0.25	1
IM:LP6008280-DNA_A05	1	3	1	31	0.14	1
IM:LP6008280-DNA_A05	1	3	2	2	0.27	1
IM:LP6008280-DNA_A05	1	4	0	91	0.31	1
IM:LP6008280-DNA_A05	1	4	2	3	0.21	1
IM:LP6008280-DNA_A06	1	1	0	4	0.15	0.43
IM:LP6008280-DNA_A06	1	1	1	6815	0.09	0.43
IM:LP6008280-DNA_A06	1	2	0	85	0.09	0.43
IM:LP6008280-DNA_A06	1	2	1	4	0.11	0.43
IM:LP6008280-DNA_A06	2	1	0	6	0.25	1
IM:LP6008280-DNA_A06	2	1	1	7846	0.21	1
IM:LP6008280-DNA_A06	2	2	0	22	0.24	1
IM:LP6008280-DNA_A06	2	2	1	3	0.16	1
IM:LP6008280-DNA_A07	1	1	0	4	0.07	0.26
IM:LP6008280-DNA_A07	1	1	1	1969	0.09	0.26
IM:LP6008280-DNA_A07	1	2	0	34	0.11	0.26
IM:LP6008280-DNA_A07	1	2	1	1	0.07	0.26
IM:LP6008280-DNA_A07	2	1	0	1	0.31	1
IM:LP6008280-DNA_A07	2	1	1	5998	0.33	1
IM:LP6008280-DNA_A07	2	2	0	16	0.29	1
IM:LP6008280-DNA_B06	1	1	0	2	0.09	0.25
IM:LP6008280-DNA_B06	1	1	1	1207	0.08	0.25
IM:LP6008280-DNA_B06	1	2	0	17	0.08	0.25
IM:LP6008280-DNA_B06	1	2	1	9	0.09	0.25
IM:LP6008280-DNA_B06	2	1	0	3	0.38	1
IM:LP6008280-DNA_B06	2	1	1	6046	0.31	1
IM:LP6008280-DNA_B06	2	2	0	62	0.52	1
IM:LP6008280-DNA_B06	2	2	1	15	0.24	1
IM:LP6008280-DNA_C06	1	1	0	9	0.11	0.28
IM:LP6008280-DNA_C06	1	1	1	3590	0.09	0.28
IM:LP6008280-DNA_C06	1	2	0	43	0.12	0.28
IM:LP6008280-DNA_C06	2	1	0	5	0.35	1
IM:LP6008280-DNA_C06	2	1	1	10230	0.32	1
IM:LP6008280-DNA_C06	2	2	0	11	0.29	1
IM:LP6008280-DNA_C06	2	2	1	1	0.39	1
IM:LP6008280-DNA_C06	2	3	1	3	0.29	1
IM:LP6008280-DNA_F06	1	1	0	4	0.12	0.25
IM:LP6008280-DNA_F06	1	1	1	2501	0.08	0.25
IM:LP6008280-DNA_F06	1	2	0	64	0.11	0.25
IM:LP6008280-DNA_F06	2	1	0	4	0.38	1
IM:LP6008280-DNA_F06	2	1	1	12601	0.3	1
IM:LP6008280-DNA_F06	2	2	0	39	0.28	1
IM:LP6008280-DNA_F06	2	2	1	5	0.26	1
IM:LP6008280-DNA_G06	1	2	0	26	0.22	1
IM:LP6008280-DNA_G06	1	2	1	2	0.12	1
IM:LP6008280-DNA_G06	1	2	2	2678	0.18	1
IM:LP6008280-DNA_G06	1	3	0	2	0.07	1
IM:LP6008280-DNA_G06	1	3	1	16	0.14	1
IM:LP6008280-DNA_G06	1	4	0	8	0.11	1
IM:LP6008280-DNA_G06	1	4	1	1	0.38	1
IM:LP6008280-DNA_G06	1	4	2	1	0.17	1
IM:LP6008280-DNA_H06	1	1	0	5	0.09	0.35
IM:LP6008280-DNA_H06	1	1	1	16112	0.09	0.35
IM:LP6008280-DNA_H06	1	2	0	254	0.17	0.35
IM:LP6008280-DNA_H06	1	2	1	145	0.13	0.35
IM:LP6008280-DNA_H06	2	1	0	1	0.3	1
IM:LP6008280-DNA_H06	2	1	1	13433	0.26	1
IM:LP6008280-DNA_H06	2	2	0	133	0.27	1
IM:LP6008280-DNA_H06	2	2	1	58	0.25	1
IM:LP6008337-DNA_A01	1	1	0	2	0.09	0.27
IM:LP6008337-DNA_A01	1	1	1	1361	0.08	0.27
IM:LP6008337-DNA_A01	1	2	0	30	0.1	0.27
IM:LP6008337-DNA_A01	2	1	0	8	0.4	1
IM:LP6008337-DNA_A01	2	1	1	4582	0.29	1
IM:LP6008337-DNA_A01	2	2	0	43	0.52	1
IM:LP6008337-DNA_A02	1	1	0	7	0.1	0.24
IM:LP6008337-DNA_A02	1	1	1	2848	0.09	0.24
IM:LP6008337-DNA_A02	1	2	0	56	0.09	0.24
IM:LP6008337-DNA_A02	1	2	1	4	0.07	0.24
IM:LP6008337-DNA_A02	2	1	0	1	0.36	1
IM:LP6008337-DNA_A02	2	1	1	5942	0.35	1
IM:LP6008337-DNA_A02	2	2	0	69	0.52	1
IM:LP6008337-DNA_A02	2	2	1	10	0.42	1
IM:LP6008337-DNA_B01	1	1	0	3	0.25	0.24
IM:LP6008337-DNA_B01	1	1	1	2519	0.09	0.24
IM:LP6008337-DNA_B01	1	2	0	59	0.09	0.24
IM:LP6008337-DNA_B01	1	2	1	2	0.07	0.24
IM:LP6008337-DNA_B01	2	1	0	10	0.58	1
IM:LP6008337-DNA_B01	2	1	1	15443	0.37	1
IM:LP6008337-DNA_B01	2	2	0	202	0.47	1
IM:LP6008337-DNA_B01	2	2	1	13	0.27	1
IM:LP6008337-DNA_B02	1	1	0	8	0.08	0.41
IM:LP6008337-DNA_B02	1	1	1	1871	0.1	0.41
IM:LP6008337-DNA_B02	1	2	0	18	0.08	0.41
IM:LP6008337-DNA_B02	2	1	0	2	0.27	1
IM:LP6008337-DNA_B02	2	1	1	2799	0.25	1
IM:LP6008337-DNA_B02	2	2	0	5	0.21	1
IM:LP6008337-DNA_C01	1	1	0	7	0.18	0.34
IM:LP6008337-DNA_C01	1	1	1	6943	0.09	0.34
IM:LP6008337-DNA_C01	1	2	1	31	0.11	0.34
IM:LP6008337-DNA_C01	2	1	0	8	0.41	1
IM:LP6008337-DNA_C01	2	1	1	11667	0.26	1
IM:LP6008337-DNA_C01	2	2	1	72	0.28	1
IM:LP6008337-DNA_D01	1	1	0	1	0.22	0.4
IM:LP6008337-DNA_D01	1	1	1	1938	0.11	0.4
IM:LP6008337-DNA_D01	1	2	0	39	0.13	0.4
IM:LP6008337-DNA_D01	2	1	0	3	0.43	1
IM:LP6008337-DNA_D01	2	1	1	3615	0.27	1
IM:LP6008337-DNA_D01	2	2	0	37	0.36	1
IM:LP6008337-DNA_D01	2	2	1	1	0.32	1
IM:LP6008337-DNA_D02	1	1	0	8	0.11	0.32
IM:LP6008337-DNA_D02	1	1	1	254	0.09	0.32
IM:LP6008337-DNA_D02	1	2	0	2	0.1	0.32
IM:LP6008337-DNA_D02	2	1	0	4	0.3	1
IM:LP6008337-DNA_D02	2	1	1	2721	0.28	1
IM:LP6008337-DNA_D02	2	2	0	2	0.23	1
IM:LP6008337-DNA_D02	2	2	1	1	0.16	1
IM:LP6008337-DNA_E01	1	1	1	2068	0.1	0.29
IM:LP6008337-DNA_E01	1	2	0	36	0.11	0.29
IM:LP6008337-DNA_E01	2	1	0	1	0.59	1
IM:LP6008337-DNA_E01	2	1	1	12125	0.35	1
IM:LP6008337-DNA_E01	2	2	0	150	0.59	1
IM:LP6008337-DNA_E01	2	2	1	3	0.38	1
IM:LP6008337-DNA_E03	1	1	0	1	0.23	0.33
IM:LP6008337-DNA_E03	1	1	1	1620	0.08	0.33
IM:LP6008337-DNA_E03	1	2	0	43	0.1	0.33
IM:LP6008337-DNA_E03	1	2	1	1	0.08	0.33
IM:LP6008337-DNA_E03	2	1	0	1	0.3	1
IM:LP6008337-DNA_E03	2	1	1	11071	0.27	1
IM:LP6008337-DNA_E03	2	2	0	40	0.23	1
IM:LP6008337-DNA_E03	2	2	1	13	0.26	1
IM:LP6008337-DNA_F01	1	1	0	1	0.13	0.23
IM:LP6008337-DNA_F01	1	1	1	829	0.09	0.23
IM:LP6008337-DNA_F01	1	2	0	14	0.12	0.23
IM:LP6008337-DNA_F01	2	1	0	1	0.71	1
IM:LP6008337-DNA_F01	2	1	1	1643	0.37	1
IM:LP6008337-DNA_F01	2	2	0	8	0.53	1
IM:LP6008337-DNA_G01	1	1	0	14	0.21	0.5
IM:LP6008337-DNA_G01	1	1	1	9666	0.14	0.5
IM:LP6008337-DNA_G01	1	2	0	365	0.18	0.5
IM:LP6008337-DNA_G01	1	2	1	2	0.21	0.5
IM:LP6008337-DNA_G01	2	1	0	3	0.43	1
IM:LP6008337-DNA_G01	2	1	1	6694	0.3	1
IM:LP6008337-DNA_G01	2	2	0	185	0.29	1
IM:LP6008337-DNA_G01	2	2	1	1	0.31	1
IM:LP6008337-DNA_G01	2	3	0	1	0.18	1
IM:LP6008337-DNA_H01	1	1	0	2	0.09	0.29
IM:LP6008337-DNA_H01	1	1	1	1557	0.09	0.29
IM:LP6008337-DNA_H01	2	1	0	8	0.45	1
IM:LP6008337-DNA_H01	2	1	1	3502	0.3	1
E-GM:SLX-21756.idtUDP0001	1	1	0	1	0.06	1
E-GM:SLX-21756.idtUDP0001	1	1	1	1559	0.08	1
E-GM:SLX-21756.idtUDP0001	1	2	0	9	0.08	1
E-GM:SLX-21756.idtUDP0001	1	2	1	3	0.09	1
E-GM:SLX-21756.idtUDP0001	1	3	1	1	0.06	1
E-GM:SLX-21756.idtUDP0002	1	1	0	5	0.09	1
E-GM:SLX-21756.idtUDP0002	1	1	1	485	0.08	1
E-GM:SLX-21756.idtUDP0002	1	2	0	5	0.09	1
E-GM:SLX-21756.idtUDP0002	1	3	1	1	0.06	1
E-GM:SLX-21756.idtUDP0003	1	1	1	335	0.08	1
E-GM:SLX-21756.idtUDP0003	1	2	0	4	0.06	1
E-GM:SLX-21756.idtUDP0005	1	1	0	1	0.12	1
E-GM:SLX-21756.idtUDP0005	1	1	1	370	0.08	1
E-GM:SLX-21756.idtUDP0005	1	2	0	8	0.07	1
E-GM:SLX-21756.idtUDP0007	1	1	0	4	0.07	1
E-GM:SLX-21756.idtUDP0007	1	1	1	875	0.07	1
E-GM:SLX-21756.idtUDP0007	1	2	0	7	0.07	1
E-GM:SLX-21756.idtUDP0007	1	2	1	2	0.06	1
E-GM:SLX-21756.idtUDP0008	1	1	0	2	0.05	1
E-GM:SLX-21756.idtUDP0008	1	1	1	1288	0.07	1
E-GM:SLX-21756.idtUDP0008	1	2	0	17	0.07	1
E-GM:SLX-21756.idtUDP0008	1	2	1	5	0.05	1
E-GM:SLX-21756.idtUDP0010	1	1	0	5	0.08	1
E-GM:SLX-21756.idtUDP0010	1	1	1	686	0.07	1
E-GM:SLX-21756.idtUDP0010	1	2	0	6	0.12	1
E-GM:SLX-21756.idtUDP0010	1	2	1	5	0.07	1
E-GM:SLX-21756.idtUDP0010	1	3	0	1	0.05	1
E-GM:SLX-21756.idtUDP0011	1	1	1	722	0.1	0.29
E-GM:SLX-21756.idtUDP0011	1	2	0	9	0.08	0.29
E-GM:SLX-21756.idtUDP0011	2	1	1	1175	0.33	1
E-GM:SLX-21756.idtUDP0011	2	2	0	5	0.27	1
E-GM:SLX-21756.idtUDP0012	1	1	0	1	0.06	1
E-GM:SLX-21756.idtUDP0012	1	1	1	1401	0.09	1
E-GM:SLX-21756.idtUDP0012	1	2	0	13	0.08	1
E-GM:SLX-21756.idtUDP0012	1	2	1	4	0.09	1
E-GM:SLX-21756.idtUDP0012	1	2	2	1	0.05	1
E-GM:SLX-21756.idtUDP0013	1	1	0	90	0.09	1
E-GM:SLX-21756.idtUDP0013	1	1	1	2869	0.09	1
E-GM:SLX-21756.idtUDP0013	1	2	0	71	0.08	1
E-GM:SLX-21761.idtUDP0039	1	1	0	1	0.05	1
E-GM:SLX-21761.idtUDP0039	1	1	1	3520	0.08	1
E-GM:SLX-21761.idtUDP0039	1	2	0	46	0.09	1
E-GM:SLX-21761.idtUDP0041	1	1	0	1	0.05	1
E-GM:SLX-21761.idtUDP0041	1	1	1	183	0.06	1
E-GM:SLX-21761.idtUDP0041	1	2	0	3	0.05	1
E-GM:SLX-21761.idtUDP0043	1	1	0	1	0.05	1
E-GM:SLX-21761.idtUDP0043	1	1	1	210	0.07	1
E-GM:SLX-21761.idtUDP0043	1	2	0	5	0.06	1
E-GM:SLX-21761.idtUDP0047	1	1	0	12	0.06	1
E-GM:SLX-21761.idtUDP0047	1	1	1	368	0.06	1
E-GM:SLX-21761.idtUDP0047	1	2	0	5	0.06	1
E-GM:SLX-21761.idtUDP0047	1	2	1	2	0.04	1
